# Supplementary material for: Hedgehog dysregulation contributes to tissue-specific inflammaging of resident macrophages
Source: Aging (Albany NY). 2021 Aug 14;13(15):19207–29. doi: 10.18632/aging.203422 (PMC8386529; doi:10.18632/aging.203422)
Supplement: Supplementary Table 2 [file aging-13-203422-s003.xlsx]

## Sheet: Age_effect_NoLPS_DEGs
Supplementary Table 2. Age NoLPS_DEGs logFC old versus young.
Cluster	ENSEMBL_ID	gene_symbol	chr	start	stop	source	strand	gene_type	BMDM_M_No_log2FC	BMDM_F_No_log2FC	BMDM_M_3h_log2FC	BMDM_F_3h_log2FC	BMDM_M_8h_log2FC	BMDM_F_8h_log2FC	PM_M_No_log2FC	PM_F_No_log2FC	PM_M_3h_log2FC	PM_F_3h_log2FC	PM_M_8h_log2FC	PM_F_8h_log2FC	KC_M_No_log2FC	KC_F_No_log2FC	KC_M_3h_log2FC	KC_F_3h_log2FC	KC_M_8h_log2FC	KC_F_8h_log2FC	MG_M_No_log2FC	MG_F_No_log2FC	MG_M_3h_log2FC	MG_F_3h_log2FC
PM-specific	ENSMUSG00000093954.8	Gm16867	chr14	69363504	69503362	HAVANA	-	protein_coding	10.8856	10.893	10.4944	11.1175	14.0291	13.9087	11.0169	13.4735	14.0788	9.53187	13.3306	13.3081	7.59031	8.10939	10.699	6.9845	6.02436	8.33953	11.5137	8.91961	11.8419	9.69432
PM-specific	ENSMUSG00000069306.5	Hist1h4m	chr13	21811746	21812147	HAVANA	+	protein_coding	12.3808	12.4206	7.62725	12.5658	6.17325	12.0981	9.47195	12.8942	12.0503	7.49899	11.6963	8.35531	9.53433	9.75317	9.12123	9.7992	8.71343	9.37146	10.5677	10.8843	10.885	4.20883
PM-specific	ENSMUSG00000096255.1	Dynlt1b	chr17	6430112	6436293	ENSEMBL	+	protein_coding	-1.183	-1.3547	-1.18811	-1.30994	-1.45894	-1.53443	-1.1729	-1.08185	-1.54503	-1.45572	-1.35077	-1.29873	-1.18175	-1.14281	-1.23555	-1.14161	-1.41345	-0.97497	-1.73425	-1.34259	-1.65836	-1.61252
PM-specific	ENSMUSG00000002847.6	Pla1a	chr16	38396119	38433145	ENSEMBL	-	protein_coding	NA	2.91279	NA	NA	NA	NA	NA	NA	NA	NA	NA	NA	NA	NA	NA	NA	NA	NA	NA	NA	NA	NA
PM-specific	ENSMUSG00000029189.10	Sel1l3	chr5	53107083	53213927	HAVANA	-	protein_coding	NA	-1.54813	NA	-1.42954	NA	-1.40785	NA	NA	NA	NA	NA	NA	NA	NA	NA	NA	NA	NA	NA	NA	NA	NA
PM-specific	ENSMUSG00000052560.15	Cpne8	chr15	90487482	90679432	HAVANA	-	protein_coding	NA	2.44968	2.69189	2.54641	NA	2.58452	NA	NA	NA	NA	NA	NA	NA	NA	NA	NA	NA	NA	NA	NA	-1.0302	NA
PM-specific	ENSMUSG00000098975.7	Gm27177	chr14	69582164	69683286	HAVANA	-	antisense	NA	9.622	9.35657	12.7164	11.9231	12.5805	9.89393	9.92292	13.2907	13.1317	12.2462	12.1942	7.07812	4.27383	7.74401	6.49982	6.43076	5.21246	4.88462	5.33825	8.77649	7.16725
PM-specific	ENSMUSG00000110386.1	Gm42031	chr8	85125872	85132289	HAVANA	-	lincRNA	NA	NA	NA	NA	NA	NA	-4.28269	-3.99242	-3.99346	-3.24136	-4.10235	-3.25176	NA	NA	NA	NA	NA	NA	-2.59251	-3.0987	-2.40712	-2.36669
PM-specific	ENSMUSG00000105703.1	Gm43305	chr14	54292443	54297343	HAVANA	-	TEC	NA	NA	NA	NA	NA	NA	-3.61119	-2.91343	-2.69127	-1.90104	-2.66842	-2.02799	NA	NA	NA	NA	NA	NA	-1.59281	-1.0073	-0.980536	-1.00587
PM-specific	ENSMUSG00000029596.13	Sdsl	chr5	120458186	120472810	HAVANA	-	protein_coding	NA	NA	NA	NA	NA	NA	2.24107	NA	1.97988	1.8178	2.24854	NA	NA	NA	NA	NA	NA	NA	NA	NA	NA	NA
PM-specific	ENSMUSG00000092837.1	Rpph1	chr14	50807449	50807767	ENSEMBL	-	ribozyme	NA	NA	NA	NA	NA	NA	1.48554	NA	NA	NA	NA	NA	NA	NA	NA	NA	NA	NA	NA	NA	NA	NA
PM-specific	ENSMUSG00000079808.3	AC168977.1	GL456212.1	128555	150452	ENSEMBL	-	protein_coding	NA	NA	NA	NA	NA	NA	2.60229	4.78322	NA	4.1986	NA	4.18179	5.33194	3.06775	3.01749	3.6576	2.85239	2.71169	NA	NA	NA	NA
PM-specific	ENSMUSG00000036103.8	Colec12	chr18	9707648	9877995	ENSEMBL	+	protein_coding	NA	NA	NA	NA	NA	NA	-1.20648	NA	-1.224	NA	-2.02233	NA	NA	NA	NA	NA	NA	NA	NA	NA	-0.845058	NA
PM-specific	ENSMUSG00000052477.15	C130026I21Rik	chr1	84992690	85270566	HAVANA	-	protein_coding	NA	NA	NA	NA	NA	NA	1.75576	3.19239	NA	2.43505	NA	2.9798	2.86727	2.66619	1.98228	2.13397	2.56126	2.33491	NA	1.34881	NA	1.33024
PM-specific	ENSMUSG00000045326.13	Fndc7	chr3	108853678	108890008	HAVANA	-	protein_coding	NA	NA	NA	NA	NA	NA	1.48488	NA	NA	NA	NA	NA	NA	NA	NA	NA	NA	NA	NA	NA	NA	NA
PM-specific	ENSMUSG00000079190.3	AC133103.1	GL456211.1	167446	196478	ENSEMBL	+	protein_coding	NA	NA	NA	NA	NA	NA	2.62887	4.3802	NA	3.764	NA	3.98161	4.26779	3.62636	4.09616	4.61654	4.2742	4.48455	NA	NA	NA	NA
PM-specific	ENSMUSG00000036136.9	Fam110c	chr12	31073861	31080251	HAVANA	+	protein_coding	NA	NA	NA	NA	NA	NA	2.93102	3.62607	NA	NA	NA	3.03302	NA	NA	NA	NA	NA	NA	NA	NA	NA	NA
PM-specific	ENSMUSG00000099693.1	Gm29284	chr1	84990638	84993032	HAVANA	-	unprocessed_pseudogene	NA	NA	NA	NA	NA	NA	5.26759	4.56872	NA	9.12912	NA	7.9311	NA	NA	NA	NA	NA	NA	NA	NA	NA	NA
PM-specific	ENSMUSG00000069305.3	Hist1h4n	chr13	21831767	21832196	HAVANA	-	protein_coding	NA	NA	NA	NA	NA	NA	NA	-1.16392	-1.68075	-1.16003	-1.06123	-1.00919	-1.91893	-2.01362	-2.13062	-1.5896	-2.62634	-1.60701	-1.54677	-1.21774	-1.46839	-1.88155
PM-specific	ENSMUSG00000058317.11	Ube2e2	chr14	18573575	18894267	HAVANA	-	protein_coding	NA	NA	NA	NA	NA	NA	NA	0.986813	NA	NA	NA	NA	NA	NA	NA	NA	NA	NA	NA	NA	NA	NA
PM-specific	ENSMUSG00000025037.6	Maoa	chrX	16619698	16687818	HAVANA	+	protein_coding	NA	NA	NA	NA	NA	NA	NA	2.86937	NA	NA	NA	NA	NA	NA	NA	NA	NA	NA	NA	NA	NA	NA
PM-specific	ENSMUSG00000029311.16	Hsd17b11	chr5	103989762	104021919	HAVANA	-	protein_coding	NA	NA	NA	NA	NA	NA	NA	0.934713	NA	NA	NA	NA	NA	NA	NA	NA	NA	NA	0.87973	NA	NA	NA
PM-specific	ENSMUSG00000087659.7	Gm12606	chr4	89235699	89273403	HAVANA	-	lincRNA	NA	NA	NA	NA	NA	NA	NA	2.69981	NA	NA	NA	NA	NA	NA	NA	NA	NA	NA	NA	NA	NA	NA
PM-specific	ENSMUSG00000089844.7	A530032D15Rik	chr1	85083069	85109853	HAVANA	-	protein_coding	NA	NA	NA	NA	NA	NA	NA	1.94253	NA	NA	NA	1.87694	NA	2.90151	NA	2.32392	NA	2.45292	NA	NA	1.99114	1.87639
PM-specific	ENSMUSG00000040640.10	Erc2	chr14	27622428	28478537	HAVANA	+	protein_coding	NA	NA	NA	NA	NA	NA	NA	-1.98914	NA	NA	NA	-2.25688	NA	NA	NA	NA	NA	NA	NA	NA	NA	NA
PM-specific	ENSMUSG00000097589.9	Dleu2	chr14	61602839	61682373	HAVANA	-	processed_transcript	NA	NA	NA	NA	NA	NA	NA	-0.800557	NA	NA	NA	-1.07842	NA	NA	NA	NA	NA	NA	NA	NA	NA	NA
PM-specific	ENSMUSG00000006235.6	Epor	chr9	21958897	21963506	HAVANA	-	protein_coding	NA	NA	NA	NA	NA	NA	NA	-2.06232	NA	NA	NA	NA	NA	NA	NA	NA	NA	NA	NA	NA	NA	NA
PM-specific	ENSMUSG00000052212.6	Cd177	chr7	24743983	24760311	HAVANA	-	protein_coding	NA	NA	NA	NA	NA	NA	NA	1.30184	NA	1.5435	NA	NA	NA	NA	NA	NA	NA	NA	NA	NA	NA	NA
PM-specific	ENSMUSG00000028972.11	Car6	chr4	150187015	150201332	HAVANA	-	protein_coding	NA	NA	NA	NA	NA	NA	NA	-1.21501	NA	NA	NA	NA	NA	NA	NA	NA	NA	NA	NA	NA	NA	NA
PM-specific	ENSMUSG00000112022.1	AC157515.1	chr12	55142109	55151007	HAVANA	-	unprocessed_pseudogene	NA	NA	NA	NA	NA	NA	NA	-7.88136	NA	NA	-7.85876	NA	NA	NA	NA	NA	NA	NA	NA	NA	NA	NA
PM-specific	ENSMUSG00000031355.16	Arhgap6	chrX	168795099	169304435	HAVANA	+	protein_coding	NA	NA	NA	NA	NA	NA	NA	-0.980737	NA	NA	NA	NA	NA	NA	NA	NA	NA	NA	NA	NA	NA	NA
PM-specific	ENSMUSG00000044646.14	Zbtb7c	chr18	75820178	76148561	ENSEMBL	+	protein_coding	NA	NA	NA	NA	NA	NA	NA	1.17402	NA	1.25012	NA	NA	NA	NA	NA	NA	NA	NA	NA	NA	NA	NA
PM-specific	ENSMUSG00000095609.1	Gm21188	chr13	120034759	120035331	ENSEMBL	-	protein_coding	NA	NA	NA	NA	NA	NA	NA	1.32926	NA	NA	NA	2.04618	NA	NA	NA	NA	NA	NA	NA	NA	NA	2.92842
PM-specific	ENSMUSG00000044734.16	Serpinb1a	chr13	32842092	32851185	HAVANA	-	protein_coding	NA	NA	NA	NA	NA	NA	NA	1.50186	NA	NA	NA	NA	NA	NA	NA	NA	NA	NA	NA	NA	NA	NA
PM-specific	ENSMUSG00000069792.5	Wfdc17	chr11	83703991	83706268	HAVANA	+	protein_coding	NA	NA	NA	NA	NA	NA	NA	0.955217	NA	NA	NA	NA	NA	NA	NA	NA	NA	NA	-1.1851	-0.891891	-1.0221	NA
PM-specific	ENSMUSG00000105044.1	Gm10416	chr5	109833501	109834145	HAVANA	-	TEC	NA	NA	NA	NA	NA	NA	NA	-2.58465	NA	NA	NA	NA	NA	NA	NA	NA	NA	NA	NA	NA	NA	NA
PM-specific	ENSMUSG00000096802.1	Gm15433	chr1	84963669	84964559	HAVANA	+	processed_pseudogene	NA	NA	NA	3.70898	3.53108	4.46241	NA	2.62527	NA	NA	NA	NA	NA	NA	NA	NA	NA	NA	NA	NA	2.75448	2.91182
PM-specific	ENSMUSG00000030144.4	Clec4d	chr6	123262111	123275265	HAVANA	+	protein_coding	NA	NA	NA	NA	NA	NA	NA	NA	NA	NA	NA	NA	NA	1.03727	NA	1.05395	NA	1.21504	NA	NA	NA	NA
PM-specific	ENSMUSG00000034591.5	Slc41a2	chr10	83230848	83337882	HAVANA	-	protein_coding	NA	NA	NA	NA	NA	NA	NA	NA	NA	NA	NA	NA	NA	0.997003	NA	1.17722	NA	NA	NA	NA	NA	NA
PM-specific	ENSMUSG00000018417.14	Myo1b	chr1	51749765	51916071	HAVANA	-	protein_coding	NA	NA	NA	NA	NA	NA	NA	NA	NA	NA	NA	NA	NA	-1.94279	NA	NA	NA	NA	NA	NA	NA	NA
PM-specific	ENSMUSG00000029605.16	Oas1b	chr5	120812635	120824163	HAVANA	+	polymorphic_pseudogene	NA	NA	NA	NA	NA	NA	NA	NA	NA	NA	NA	NA	NA	-1.45319	NA	NA	NA	NA	NA	NA	NA	NA
PM-specific	ENSMUSG00000039239.14	Tgfb2	chr1	186622792	186705989	HAVANA	-	protein_coding	NA	NA	NA	NA	NA	NA	NA	NA	NA	NA	NA	NA	NA	NA	NA	NA	NA	NA	-1.22807	-1.12181	-0.866327	NA
PM-specific	ENSMUSG00000038764.14	Ptpn3	chr4	57190841	57301837	HAVANA	-	protein_coding	NA	NA	NA	NA	NA	NA	NA	NA	NA	NA	NA	NA	NA	NA	NA	NA	NA	NA	-1.60726	NA	-1.25019	NA
PM-specific	ENSMUSG00000019122.8	Ccl9	chr11	83572919	83578636	HAVANA	-	protein_coding	NA	NA	NA	NA	NA	NA	NA	NA	NA	NA	NA	1.33533	NA	NA	NA	NA	NA	NA	-2.27316	-2.26374	-1.74031	-1.72681
PM-specific	ENSMUSG00000042616.8	Oscp1	chr4	126058565	126092195	HAVANA	+	protein_coding	NA	NA	NA	NA	NA	NA	NA	NA	NA	NA	NA	NA	NA	NA	NA	NA	NA	NA	-1.38575	-0.896352	-1.7864	NA
PM-specific	ENSMUSG00000035042.2	Ccl5	chr11	83525778	83530518	HAVANA	-	protein_coding	NA	NA	NA	NA	NA	NA	NA	NA	NA	NA	NA	NA	NA	NA	NA	NA	NA	NA	1.60231	1.51038	NA	NA
PM-specific	ENSMUSG00000021215.15	Net1	chr13	3882018	3918220	HAVANA	-	protein_coding	NA	NA	NA	NA	NA	NA	NA	NA	NA	NA	NA	NA	NA	NA	NA	NA	NA	NA	-1.03383	NA	-0.928769	NA
PM-specific	ENSMUSG00000058672.7	Tubb2a	chr13	34074274	34078007	HAVANA	-	protein_coding	NA	NA	NA	NA	NA	NA	NA	NA	NA	NA	NA	NA	NA	NA	NA	NA	NA	NA	-0.95847	NA	-1.17206	NA
PM-specific	ENSMUSG00000054951.2	9130008F23Rik	chr17	40875482	40880558	ENSEMBL	-	protein_coding	NA	NA	NA	NA	NA	NA	NA	NA	NA	NA	NA	NA	NA	NA	NA	NA	NA	NA	-1.59752	NA	-1.49637	NA
PM-specific	ENSMUSG00000041797.7	Abca9	chr11	110100749	110168196	HAVANA	-	protein_coding	NA	NA	NA	NA	NA	NA	NA	NA	NA	NA	NA	NA	NA	NA	NA	NA	NA	NA	-1.20533	-0.823795	-1.11077	NA
PM-specific	ENSMUSG00000032232.14	Cgnl1	chr9	71626509	71771602	HAVANA	-	protein_coding	NA	NA	NA	NA	NA	NA	NA	NA	NA	NA	NA	NA	NA	NA	NA	NA	NA	NA	-1.47521	-0.986729	-1.49857	-0.918302
PM-specific	ENSMUSG00000029810.15	Tmem176b	chr6	48833818	48841496	HAVANA	-	protein_coding	NA	NA	NA	NA	NA	NA	NA	NA	NA	NA	NA	NA	NA	NA	NA	NA	NA	NA	-1.50816	NA	-1.48391	NA
PM-specific	ENSMUSG00000040907.15	Atp1a3	chr7	24978167	25005958	HAVANA	-	protein_coding	NA	NA	NA	NA	NA	NA	NA	NA	NA	NA	NA	NA	NA	NA	NA	NA	NA	NA	1.20007	NA	NA	NA
PM-specific	ENSMUSG00000034220.7	Gpc1	chr1	92831645	92860779	HAVANA	+	protein_coding	NA	NA	NA	NA	NA	NA	NA	NA	NA	NA	NA	NA	NA	NA	NA	NA	NA	NA	-1.28177	NA	-1.41314	-0.922911
PM-specific	ENSMUSG00000039197.9	Adk	chr14	21052574	21448568	ENSEMBL	+	protein_coding	NA	NA	NA	NA	NA	NA	NA	NA	NA	NA	NA	NA	NA	NA	NA	NA	NA	NA	-0.82744	NA	NA	NA
PM-specific	ENSMUSG00000039611.2	Tmem246	chr4	49584506	49597876	HAVANA	-	protein_coding	NA	NA	NA	NA	NA	NA	NA	NA	NA	NA	NA	NA	NA	NA	NA	NA	NA	NA	-1.68053	NA	-1.20448	NA
PM-specific	ENSMUSG00000023800.14	Tiam2	chr17	3326573	3519397	ENSEMBL	+	protein_coding	NA	NA	NA	NA	NA	NA	NA	NA	NA	NA	NA	NA	NA	NA	NA	NA	NA	NA	-1.41076	NA	-0.991847	NA
PM-specific	ENSMUSG00000022102.13	Dok2	chr14	70766036	70778495	HAVANA	+	protein_coding	NA	NA	NA	NA	NA	NA	NA	NA	NA	NA	NA	NA	NA	NA	NA	NA	NA	NA	-1.1341	-1.17645	-0.931633	-1.17538
PM-specific	ENSMUSG00000021365.14	Nedd9	chr13	41309916	41487320	ENSEMBL	-	protein_coding	NA	NA	NA	NA	NA	NA	NA	NA	NA	NA	NA	NA	NA	NA	NA	NA	NA	NA	-0.960311	NA	-0.882446	NA
PM-specific	ENSMUSG00000074115.5	Saa1	chr7	46740497	46742980	HAVANA	-	protein_coding	NA	NA	NA	NA	NA	NA	NA	NA	NA	NA	NA	NA	NA	NA	NA	NA	NA	NA	-5.86441	NA	-5.38847	NA
PM-specific	ENSMUSG00000032554.15	Trf	chr9	103204001	103230444	HAVANA	-	protein_coding	NA	NA	NA	NA	NA	NA	NA	NA	NA	NA	NA	NA	NA	NA	NA	NA	NA	NA	-1.15212	NA	-1.44928	NA
PM-specific	ENSMUSG00000018340.13	Anxa6	chr11	54979108	55033445	HAVANA	-	protein_coding	NA	NA	NA	NA	NA	NA	NA	NA	NA	NA	NA	-1.09056	NA	NA	NA	NA	NA	NA	-0.847079	NA	-0.97743	NA
PM-specific	ENSMUSG00000033467.12	Crlf2	chr5	109554709	109558993	HAVANA	-	protein_coding	NA	NA	NA	NA	NA	NA	NA	NA	NA	NA	NA	NA	NA	NA	NA	NA	NA	NA	0.810547	0.817684	0.82908	NA
PM-specific	ENSMUSG00000028647.13	Mycbp	chr4	123904832	123912269	HAVANA	+	protein_coding	NA	NA	NA	NA	NA	NA	NA	NA	NA	NA	NA	NA	NA	NA	NA	NA	NA	NA	-0.817408	NA	NA	NA
PM-specific	ENSMUSG00000026579.8	F5	chr1	164151838	164220277	HAVANA	+	protein_coding	NA	NA	NA	NA	NA	NA	NA	NA	NA	NA	NA	NA	NA	NA	NA	NA	NA	NA	-1.41148	-1.10709	-1.62849	NA
PM-specific	ENSMUSG00000023832.13	Acat2	chr17	12942890	12960747	HAVANA	-	protein_coding	NA	NA	NA	NA	NA	NA	NA	NA	NA	NA	NA	NA	NA	NA	NA	NA	NA	NA	-0.940538	NA	-0.83628	NA
PM-specific	ENSMUSG00000019874.11	Fabp7	chr10	57784881	57788450	HAVANA	+	protein_coding	NA	NA	NA	NA	NA	NA	NA	NA	NA	1.24272	NA	1.76432	NA	NA	NA	NA	NA	NA	-1.04994	-1.03457	-0.960438	-0.91992
PM-specific	ENSMUSG00000024087.3	Cyp1b1	chr17	79706953	79715041	ENSEMBL	-	protein_coding	NA	NA	NA	NA	NA	NA	NA	NA	NA	-1.91227	NA	-1.75378	NA	NA	NA	NA	NA	NA	-1.52458	-1.59829	-1.69004	-1.53401
PM-specific	ENSMUSG00000040026.8	Saa3	chr7	46711998	46715700	HAVANA	-	protein_coding	NA	NA	NA	NA	NA	NA	NA	NA	NA	NA	NA	NA	NA	NA	NA	NA	NA	NA	-2.08664	NA	NA	NA
PM-specific	ENSMUSG00000060550.15	H2-Q7	chr17	35439155	35443773	HAVANA	+	protein_coding	NA	NA	NA	NA	NA	NA	NA	NA	NA	NA	NA	NA	NA	NA	NA	NA	NA	NA	1.01094	1.2752	NA	1.08349
PM-specific	ENSMUSG00000040152.8	Thbs1	chr2	118111876	118127133	HAVANA	+	protein_coding	NA	NA	NA	NA	NA	NA	NA	NA	NA	NA	NA	NA	NA	NA	NA	NA	NA	NA	-1.44365	-1.07283	-1.58226	NA
PM-specific	ENSMUSG00000031373.4	Car5b	chrX	163976822	164027997	HAVANA	-	protein_coding	NA	NA	NA	NA	NA	NA	NA	NA	NA	NA	NA	NA	NA	NA	NA	NA	NA	NA	-1.07091	-0.811572	-1.09688	-0.819707
PM-specific	ENSMUSG00000055172.10	C1ra	chr6	124512405	124523443	HAVANA	+	protein_coding	NA	NA	NA	NA	NA	NA	NA	NA	NA	NA	NA	1.26157	NA	NA	NA	NA	NA	NA	-1.61534	NA	-1.77932	NA
PM-specific	ENSMUSG00000001870.15	Ltbp1	chr17	75005568	75392512	HAVANA	+	protein_coding	NA	NA	NA	NA	NA	NA	NA	NA	NA	NA	NA	NA	NA	NA	NA	NA	NA	NA	-1.19378	NA	-1.22816	NA
PM-specific	ENSMUSG00000008318.10	Relt	chr7	100845847	100863446	HAVANA	-	protein_coding	NA	NA	NA	NA	NA	NA	NA	NA	NA	NA	NA	NA	NA	NA	NA	NA	NA	NA	-0.981461	-1.02629	-1.37255	NA
PM-specific	ENSMUSG00000038776.13	Ephx1	chr1	180976210	181020904	HAVANA	-	protein_coding	NA	NA	NA	NA	NA	NA	NA	NA	NA	NA	NA	NA	NA	NA	NA	NA	1.12646	NA	-0.910875	NA	-1.22859	NA
PM-specific	ENSMUSG00000001300.16	Efnb2	chr8	8617434	8661242	HAVANA	-	protein_coding	NA	NA	NA	NA	NA	NA	NA	NA	NA	NA	NA	NA	NA	NA	NA	NA	NA	NA	-1.24546	NA	NA	NA
PM-specific	ENSMUSG00000014158.12	Trpv4	chr5	114622152	114658421	HAVANA	-	protein_coding	NA	NA	NA	NA	NA	NA	NA	NA	NA	NA	NA	NA	NA	NA	NA	NA	NA	NA	-0.894983	NA	-1.02271	NA
PM-specific	ENSMUSG00000021638.12	Ocln	chr13	100496507	100552718	HAVANA	-	protein_coding	NA	NA	NA	NA	NA	NA	NA	NA	NA	NA	NA	NA	NA	NA	NA	NA	NA	NA	-1.08268	NA	-1.02103	NA
PM-specific	ENSMUSG00000046245.13	Pilra	chr5	137821952	137836281	HAVANA	-	protein_coding	NA	NA	NA	NA	NA	NA	NA	NA	NA	NA	NA	NA	NA	NA	NA	NA	NA	NA	-1.02471	NA	-1.05648	NA
PM-specific	ENSMUSG00000026235.14	Epha4	chr1	77367185	77515088	HAVANA	-	protein_coding	NA	NA	NA	NA	NA	NA	NA	NA	NA	NA	NA	NA	NA	NA	NA	NA	NA	NA	-1.01384	NA	NA	NA
PM-specific	ENSMUSG00000030088.15	Aldh1l1	chr6	90486427	90600203	HAVANA	+	protein_coding	NA	NA	NA	NA	NA	NA	NA	NA	NA	NA	NA	NA	NA	NA	NA	NA	NA	NA	-1.23561	NA	-1.03374	NA
PM-specific	ENSMUSG00000056592.14	Zfp658	chr7	43562256	43575461	HAVANA	+	protein_coding	NA	NA	NA	NA	NA	NA	NA	NA	NA	NA	NA	NA	NA	NA	NA	NA	NA	NA	1.00434	NA	NA	NA
PM-specific	ENSMUSG00000047409.13	Ctdspl	chr9	118926453	119043998	HAVANA	+	protein_coding	NA	NA	NA	NA	NA	NA	NA	NA	NA	NA	NA	NA	NA	NA	NA	NA	NA	NA	-0.967363	NA	-1.16407	NA
PM-specific	ENSMUSG00000060591.9	Ifitm2	chr7	140954837	140955987	HAVANA	-	protein_coding	NA	NA	NA	NA	NA	NA	NA	NA	NA	NA	NA	NA	NA	NA	NA	NA	NA	NA	-1.17932	NA	-1.18975	NA
PM-specific	ENSMUSG00000040964.16	Arhgef10l	chr4	140514485	140666012	HAVANA	-	protein_coding	NA	NA	NA	NA	NA	NA	NA	NA	NA	NA	NA	NA	NA	NA	NA	NA	NA	NA	-0.984761	NA	NA	-1.26271
PM-specific	ENSMUSG00000060594.6	Layn	chr9	51054640	51077094	HAVANA	-	protein_coding	NA	NA	NA	NA	NA	NA	NA	NA	NA	NA	NA	NA	NA	NA	NA	NA	NA	NA	-0.857964	NA	NA	NA
PM-specific	ENSMUSG00000031788.14	Kifc3	chr8	95099828	95202812	HAVANA	-	protein_coding	NA	NA	NA	NA	NA	NA	NA	NA	NA	NA	NA	NA	NA	NA	NA	NA	NA	NA	-0.843818	NA	-1.2391	NA
PM-specific	ENSMUSG00000020178.6	Adora2a	chr10	75316877	75334784	HAVANA	+	protein_coding	NA	NA	NA	NA	NA	NA	NA	NA	NA	NA	NA	NA	NA	NA	NA	NA	NA	NA	1.47643	NA	NA	NA
PM-specific	ENSMUSG00000090639.1	Gm20425	chr9	103190208	103230307	HAVANA	-	protein_coding	NA	NA	NA	NA	NA	NA	NA	NA	NA	NA	NA	NA	NA	NA	NA	NA	NA	NA	-1.23403	NA	NA	NA
PM-specific	ENSMUSG00000079845.8	Xlr4a	chrX	73074345	73082478	HAVANA	-	protein_coding	NA	NA	NA	NA	NA	NA	NA	NA	NA	NA	NA	NA	NA	NA	NA	NA	NA	NA	1.28509	1.469	NA	NA
PM-specific	ENSMUSG00000017002.14	Slpi	chr2	164354070	164389095	HAVANA	-	protein_coding	NA	NA	NA	NA	NA	NA	NA	NA	NA	NA	NA	NA	NA	NA	NA	NA	NA	NA	-1.27408	NA	NA	NA
PM-specific	ENSMUSG00000044303.6	Cdkn2a	chr4	89274471	89294653	HAVANA	-	protein_coding	NA	NA	NA	NA	NA	NA	NA	NA	NA	NA	NA	NA	NA	NA	NA	NA	NA	NA	2.04306	3.31049	2.1769	2.73622
PM-specific	ENSMUSG00000044674.6	Fzd1	chr5	4753839	4758035	HAVANA	-	protein_coding	NA	NA	NA	NA	NA	NA	NA	NA	NA	NA	NA	NA	NA	NA	NA	1.99828	NA	NA	-1.08493	NA	-0.995745	NA
PM-specific	ENSMUSG00000036273.15	Lrrk2	chr15	91673175	91816120	HAVANA	+	protein_coding	NA	NA	NA	NA	NA	NA	NA	NA	NA	NA	NA	NA	NA	NA	NA	NA	NA	NA	-1.11603	NA	NA	NA
PM-specific	ENSMUSG00000080848.3	Gm9385	chr9	116040593	116041064	HAVANA	-	processed_pseudogene	NA	NA	NA	NA	NA	NA	NA	NA	NA	NA	NA	NA	NA	NA	NA	NA	NA	NA	0.88164	NA	NA	NA
PM-specific	ENSMUSG00000034926.3	Dhcr24	chr4	106561038	106589113	HAVANA	+	protein_coding	NA	NA	NA	NA	NA	NA	NA	NA	NA	NA	NA	NA	NA	NA	NA	NA	NA	NA	-0.850729	NA	-0.951115	-0.973882
PM-specific	ENSMUSG00000066684.10	Pilrb1	chr5	137852147	137858106	HAVANA	-	protein_coding	NA	NA	NA	NA	NA	NA	NA	NA	NA	NA	NA	NA	NA	NA	NA	NA	NA	NA	-1.04008	NA	-1.04845	NA
PM-specific	ENSMUSG00000038860.15	Garnl3	chr2	32986224	33131654	HAVANA	-	protein_coding	NA	NA	NA	NA	NA	NA	NA	NA	NA	NA	NA	NA	NA	NA	NA	NA	NA	NA	-0.820661	NA	-1.0656	NA
PM-specific	ENSMUSG00000048772.15	Tmem53	chr4	117251951	117268582	HAVANA	+	protein_coding	NA	NA	NA	NA	NA	NA	NA	NA	NA	NA	NA	NA	NA	NA	NA	NA	NA	NA	-1.07295	NA	-1.05445	NA
PM-specific	ENSMUSG00000038527.9	C1rl	chr6	124493113	124510643	HAVANA	+	protein_coding	NA	NA	NA	NA	NA	NA	NA	NA	NA	NA	NA	NA	NA	NA	NA	NA	NA	NA	-0.87075	NA	-1.10233	NA
PM-specific	ENSMUSG00000018500.2	Adora2b	chr11	62248984	62266453	HAVANA	+	protein_coding	NA	NA	NA	NA	NA	NA	NA	NA	NA	NA	NA	NA	NA	NA	NA	NA	NA	NA	-0.96988	-1.02932	NA	NA
PM-specific	ENSMUSG00000095054.1	Gm13146	chr4	147187708	147188487	HAVANA	+	processed_pseudogene	NA	NA	NA	NA	NA	NA	NA	NA	NA	NA	NA	NA	NA	NA	NA	NA	NA	NA	1.84983	NA	NA	NA
PM-specific	ENSMUSG00000095620.7	2010005H15Rik	chr16	36221468	36257444	HAVANA	+	protein_coding	NA	NA	NA	NA	NA	NA	NA	NA	NA	NA	NA	NA	NA	NA	NA	NA	NA	NA	-2.35224	NA	-2.46502	NA
PM-specific	ENSMUSG00000003355.6	Fkbp11	chr15	98724373	98728198	ENSEMBL	-	protein_coding	NA	NA	NA	NA	NA	NA	NA	NA	NA	NA	NA	NA	NA	NA	NA	NA	NA	NA	-0.987419	NA	NA	NA
PM-specific	ENSMUSG00000026833.18	Olfm1	chr2	28192992	28230736	HAVANA	+	protein_coding	NA	NA	NA	NA	NA	NA	NA	NA	NA	NA	NA	NA	NA	NA	NA	NA	NA	NA	-0.9156	NA	NA	NA
PM-specific	ENSMUSG00000032507.15	Fbxl2	chr9	113963637	114046191	HAVANA	-	protein_coding	NA	NA	NA	NA	NA	NA	NA	NA	NA	NA	NA	NA	NA	NA	NA	NA	NA	NA	-0.862615	NA	-1.07623	NA
PM-specific	ENSMUSG00000030142.10	Clec4e	chr6	123281789	123289870	HAVANA	-	protein_coding	NA	NA	NA	NA	NA	NA	NA	NA	NA	NA	NA	NA	NA	NA	NA	NA	NA	NA	0.861161	NA	NA	NA
PM-specific	ENSMUSG00000073716.6	Gm13241	chr4	146475332	146476111	HAVANA	+	processed_pseudogene	NA	NA	NA	NA	NA	NA	NA	NA	NA	NA	NA	NA	NA	NA	NA	NA	NA	NA	1.29485	NA	NA	NA
PM-specific	ENSMUSG00000075256.9	Cerkl	chr2	79330543	79456785	HAVANA	-	protein_coding	NA	NA	NA	NA	NA	NA	NA	NA	NA	NA	NA	NA	NA	NA	NA	NA	NA	NA	-1.14822	NA	NA	NA
PM-specific	ENSMUSG00000069899.3	Gm12166	chr11	46051354	46052321	HAVANA	-	protein_coding	NA	NA	NA	NA	NA	NA	NA	NA	NA	NA	NA	NA	NA	NA	NA	NA	NA	NA	-0.893389	NA	NA	NA
PM-specific	ENSMUSG00000048164.8	Gm7204	chr16	48218605	48219204	ENSEMBL	+	processed_pseudogene	NA	NA	NA	NA	NA	NA	NA	NA	NA	NA	NA	NA	NA	NA	NA	NA	NA	NA	1.07833	NA	NA	NA
PM-specific	ENSMUSG00000029490.3	Mfsd7a	chr5	108441054	108448891	ENSEMBL	-	protein_coding	NA	NA	NA	NA	NA	NA	NA	NA	NA	NA	NA	NA	NA	NA	NA	NA	NA	NA	0.928768	NA	NA	NA
PM-specific	ENSMUSG00000035105.5	Egln3	chr12	54178981	54203860	HAVANA	-	protein_coding	NA	NA	NA	NA	NA	NA	NA	NA	NA	NA	NA	NA	NA	NA	NA	NA	NA	NA	NA	1.23648	NA	NA
PM-specific	ENSMUSG00000099647.1	Gm5776	chr7	54412158	54412478	HAVANA	-	processed_pseudogene	NA	NA	NA	NA	NA	NA	NA	NA	NA	NA	NA	NA	NA	NA	NA	NA	NA	NA	NA	-5.45484	NA	NA
PM-specific	ENSMUSG00000067768.12	Xlr4b	chrX	73214333	73222453	HAVANA	+	protein_coding	NA	NA	NA	NA	NA	NA	NA	NA	NA	NA	NA	NA	NA	NA	NA	NA	NA	NA	NA	1.26721	NA	NA
PM-specific	ENSMUSG00000037661.14	Gpr160	chr3	30855950	30897192	HAVANA	+	protein_coding	NA	NA	NA	NA	NA	NA	NA	NA	NA	NA	NA	NA	NA	NA	NA	NA	NA	NA	NA	0.896584	NA	NA
PM-specific	ENSMUSG00000019842.6	Traf3ip2	chr10	39612934	39655307	HAVANA	+	protein_coding	NA	NA	NA	NA	NA	NA	NA	NA	NA	NA	NA	NA	NA	NA	NA	NA	NA	NA	NA	-1.05802	-1.05167	-0.902613
Microglia-specific age-repressed	ENSMUSG00000073643.11	Wdfy1	chr1	79702262	79776143	HAVANA	-	protein_coding	-1.95572	-2.15495	-1.85453	-2.07993	-2.14868	-1.86052	-2.01658	-1.74882	-2.10146	-1.93628	-2.19344	-1.90087	-1.91837	-1.75323	-1.70507	-1.70214	-1.78822	-1.69556	-2.05525	-2.14586	-2.00324	-2.06272
Microglia-specific age-repressed	ENSMUSG00000021796.14	Bmpr1a	chr14	34410734	34503341	HAVANA	-	protein_coding	2.58165	3.06147	2.62106	3.31734	2.64968	3.23498	NA	NA	NA	NA	NA	NA	NA	NA	NA	NA	NA	NA	NA	NA	NA	NA
Microglia-specific age-repressed	ENSMUSG00000022425.15	Enpp2	chr15	54838898	54920146	HAVANA	-	protein_coding	NA	2.67719	NA	NA	NA	NA	NA	NA	NA	NA	NA	NA	NA	NA	NA	NA	NA	NA	-1.70278	-1.0628	-1.87678	-1.08748
Microglia-specific age-repressed	ENSMUSG00000027832.5	Ptx3	chr3	66219910	66225805	HAVANA	+	protein_coding	NA	3.3706	NA	NA	NA	NA	NA	NA	NA	3.16905	NA	NA	NA	NA	NA	NA	NA	NA	-3.0547	-1.99589	-2.91919	-1.59509
Microglia-specific age-repressed	ENSMUSG00000025453.16	Nnt	chr13	119335448	119408997	HAVANA	-	protein_coding	NA	NA	NA	NA	NA	NA	-1.55633	-1.19834	-1.26109	-1.67428	-1.07368	NA	NA	NA	NA	NA	NA	NA	-1.15748	-1.24122	-1.14739	-1.50406
Microglia-specific age-repressed	ENSMUSG00000073791.11	Efcab7	chr4	99829198	99912788	HAVANA	+	protein_coding	NA	NA	NA	NA	NA	NA	-1.51209	-1.51309	NA	NA	-1.90376	-2.33949	NA	NA	NA	NA	NA	NA	-1.48846	-1.86294	-1.972	-2.04765
Microglia-specific age-repressed	ENSMUSG00000039578.16	Ccser1	chr6	61180324	62382865	HAVANA	+	protein_coding	NA	NA	NA	NA	NA	NA	NA	5.00944	NA	5.01959	NA	4.69869	NA	NA	NA	NA	NA	NA	-2.52055	-1.13166	-1.88049	-1.6804
Microglia-specific age-repressed	ENSMUSG00000022199.10	Slc22a17	chr14	54906727	54913132	ENSEMBL	-	protein_coding	NA	NA	NA	NA	NA	NA	NA	-1.32784	NA	NA	NA	NA	NA	NA	NA	NA	NA	NA	-1.78208	NA	-1.77117	NA
Microglia-specific age-repressed	ENSMUSG00000052698.15	Tln2	chr9	67217087	67559703	HAVANA	-	protein_coding	NA	NA	NA	NA	NA	NA	NA	-1.77999	NA	NA	NA	-1.78692	NA	NA	NA	NA	NA	NA	-0.912335	-0.911151	-1.22539	-0.952533
Microglia-specific age-repressed	ENSMUSG00000025085.16	Ablim1	chr19	57032733	57314919	HAVANA	-	protein_coding	NA	NA	NA	NA	NA	NA	NA	2.05629	NA	NA	NA	NA	NA	NA	NA	NA	NA	NA	NA	NA	-1.02156	NA
Microglia-specific age-repressed	ENSMUSG00000016024.9	Lbp	chr2	158306493	158332852	HAVANA	+	protein_coding	NA	NA	NA	NA	NA	NA	NA	1.65938	NA	1.70486	NA	1.9923	NA	NA	NA	NA	NA	NA	-2.34325	-1.38165	-2.24197	-1.50758
Microglia-specific age-repressed	ENSMUSG00000029409.7	U90926	chr5	92209893	92215408	HAVANA	-	protein_coding	NA	NA	NA	NA	NA	NA	NA	2.99319	NA	NA	NA	NA	NA	NA	NA	NA	NA	NA	-1.52221	NA	NA	NA
Microglia-specific age-repressed	ENSMUSG00000023019.12	Gpd1	chr15	99717515	99725005	HAVANA	+	protein_coding	NA	NA	NA	NA	NA	NA	NA	1.70361	NA	NA	NA	NA	NA	NA	NA	NA	NA	NA	-1.13371	NA	NA	NA
Microglia-specific age-repressed	ENSMUSG00000001247.16	Lsr	chr7	30957770	30973464	HAVANA	-	protein_coding	NA	NA	NA	NA	NA	NA	NA	-0.947585	NA	NA	NA	NA	NA	NA	NA	NA	NA	NA	-1.89796	-1.20361	-1.65913	-1.17813
Microglia-specific age-repressed	ENSMUSG00000031520.6	Vegfc	chr8	54077606	54187096	HAVANA	+	protein_coding	NA	NA	NA	NA	NA	NA	NA	NA	NA	NA	NA	NA	-2.47584	NA	-2.07178	NA	-1.83456	NA	NA	NA	NA	NA
Microglia-specific age-repressed	ENSMUSG00000035783.8	Acta2	chr19	34241090	34255336	ENSEMBL	-	protein_coding	NA	NA	NA	NA	NA	NA	NA	NA	NA	NA	NA	NA	2.25461	NA	NA	2.30165	NA	2.10785	-1.37481	-1.36545	-1.47714	-1.25193
Microglia-specific age-repressed	ENSMUSG00000039470.15	Zdhhc2	chr8	40423815	40510268	HAVANA	+	protein_coding	NA	NA	NA	NA	NA	NA	NA	NA	-1.56814	NA	NA	NA	NA	NA	NA	NA	NA	NA	-1.64822	-1.70795	-1.50095	-1.10667
Microglia-specific age-repressed	ENSMUSG00000026042.16	Col5a2	chr1	45374321	45503282	HAVANA	-	protein_coding	NA	NA	NA	NA	NA	NA	NA	NA	NA	NA	NA	NA	NA	NA	NA	NA	NA	NA	-2.70191	-2.20797	-2.75066	-2.23347
Microglia-specific age-repressed	ENSMUSG00000002808.7	Epdr1	chr13	19591706	19619927	HAVANA	-	protein_coding	NA	NA	NA	NA	NA	NA	NA	NA	NA	NA	NA	NA	NA	NA	NA	NA	NA	NA	-1.70386	-1.41613	-1.59857	-1.23542
Microglia-specific age-repressed	ENSMUSG00000047230.6	Cldn2	chrX	139800828	139811386	HAVANA	+	protein_coding	NA	NA	NA	NA	NA	NA	NA	NA	NA	NA	NA	NA	NA	NA	NA	NA	NA	NA	-2.66191	-1.33273	-2.67622	-1.29567
Microglia-specific age-repressed	ENSMUSG00000025083.17	Afap1l2	chr19	56912361	57008228	HAVANA	-	protein_coding	NA	NA	NA	NA	NA	NA	NA	NA	NA	NA	NA	NA	NA	NA	NA	NA	NA	NA	-2.09115	-1.32082	-2.01815	-1.55091
Microglia-specific age-repressed	ENSMUSG00000027820.12	Mme	chr3	63241537	63386030	HAVANA	+	protein_coding	NA	NA	NA	NA	NA	NA	NA	NA	NA	NA	NA	NA	NA	NA	NA	NA	NA	NA	-2.93172	-2.6683	-3.13068	-2.81618
Microglia-specific age-repressed	ENSMUSG00000031351.15	Zfp185	chrX	72987339	73031543	HAVANA	+	protein_coding	NA	NA	NA	NA	NA	NA	NA	NA	NA	NA	NA	NA	NA	NA	NA	NA	NA	NA	-2.11745	-0.991538	-1.8924	NA
Microglia-specific age-repressed	ENSMUSG00000027702.7	Lrrc34	chr3	30624267	30647869	HAVANA	-	protein_coding	NA	NA	NA	NA	NA	NA	NA	NA	NA	NA	NA	NA	NA	NA	NA	NA	NA	NA	-2.2037	-1.66839	-1.55761	-1.36183
Microglia-specific age-repressed	ENSMUSG00000049128.7	Ivl	chr3	92570902	92573735	HAVANA	-	protein_coding	NA	NA	NA	NA	NA	NA	NA	NA	NA	NA	NA	NA	NA	NA	NA	NA	NA	NA	-3.38492	-2.23179	-3.51871	-2.4612
Microglia-specific age-repressed	ENSMUSG00000031089.7	Slc6a14	chrX	21714896	21742355	HAVANA	+	protein_coding	NA	NA	NA	NA	NA	NA	NA	NA	NA	NA	NA	NA	NA	NA	NA	NA	NA	NA	-5.20989	-3.55207	-6.12351	-3.08248
Microglia-specific age-repressed	ENSMUSG00000031428.11	Zcchc18	chrX	136993155	136998472	HAVANA	+	protein_coding	NA	NA	NA	NA	NA	NA	NA	NA	NA	NA	NA	NA	NA	NA	NA	NA	NA	NA	-2.19353	-0.96699	-2.02769	NA
Microglia-specific age-repressed	ENSMUSG00000048416.15	Mlf1	chr3	67374097	67400003	HAVANA	+	protein_coding	NA	NA	NA	NA	NA	NA	NA	NA	NA	NA	NA	NA	NA	NA	NA	NA	NA	NA	-1.92348	-1.3079	-1.94154	-1.42478
Microglia-specific age-repressed	ENSMUSG00000039954.8	Stk32a	chr18	43207697	43317481	ENSEMBL	+	protein_coding	NA	NA	NA	NA	NA	NA	NA	NA	NA	NA	NA	NA	NA	NA	NA	NA	NA	NA	-1.90529	-1.34525	-1.82707	-0.993753
Microglia-specific age-repressed	ENSMUSG00000025151.16	Maged1	chrX	94535474	94542143	HAVANA	-	protein_coding	NA	NA	NA	NA	NA	NA	NA	NA	NA	NA	NA	NA	NA	NA	NA	NA	NA	NA	-0.872713	NA	-0.851152	NA
Microglia-specific age-repressed	ENSMUSG00000031517.8	Gpm6a	chr8	54954843	55060871	HAVANA	+	protein_coding	NA	NA	NA	NA	NA	NA	NA	NA	NA	NA	NA	NA	NA	NA	NA	NA	NA	NA	-2.22999	-1.10062	-2.281	-1.21663
Microglia-specific age-repressed	ENSMUSG00000019892.13	Lrriq1	chr10	103046031	103236322	HAVANA	-	protein_coding	NA	NA	NA	NA	NA	NA	NA	NA	NA	NA	NA	NA	NA	NA	NA	NA	NA	NA	-1.98527	-1.47289	-2.33456	-1.22968
Microglia-specific age-repressed	ENSMUSG00000039519.6	Cyp7b1	chr3	18071950	18243338	HAVANA	-	protein_coding	NA	NA	NA	NA	NA	NA	NA	NA	NA	NA	NA	NA	NA	NA	NA	NA	NA	NA	-2.12209	-1.38761	-1.94496	-1.34595
Microglia-specific age-repressed	ENSMUSG00000064246.10	Chil1	chr1	134182176	134190181	HAVANA	+	protein_coding	NA	NA	NA	NA	NA	NA	NA	NA	NA	NA	NA	NA	NA	NA	NA	NA	NA	NA	-2.79446	-1.2289	-2.99596	-1.28607
Microglia-specific age-repressed	ENSMUSG00000024867.14	Pip5k1b	chr19	24294794	24555872	HAVANA	-	protein_coding	NA	NA	NA	NA	NA	NA	NA	NA	NA	NA	NA	NA	NA	NA	NA	NA	NA	NA	-1.87077	-1.1255	-1.7861	-0.828441
Microglia-specific age-repressed	ENSMUSG00000035274.13	Tpbg	chr9	85842380	85847040	HAVANA	+	protein_coding	NA	NA	NA	NA	NA	NA	NA	NA	NA	NA	NA	NA	NA	NA	NA	NA	NA	NA	-1.34224	-0.912182	NA	NA
Microglia-specific age-repressed	ENSMUSG00000079592.9	C1qtnf5	chr9	44107245	44109187	HAVANA	+	protein_coding	NA	NA	NA	NA	NA	NA	NA	NA	NA	NA	NA	NA	NA	NA	NA	NA	NA	NA	-2.20271	-1.16321	-2.17444	-1.201
Microglia-specific age-repressed	ENSMUSG00000001827.12	Folr1	chr7	101858331	101870788	HAVANA	-	protein_coding	NA	NA	NA	NA	NA	NA	NA	NA	NA	NA	NA	NA	NA	NA	NA	NA	NA	NA	-2.06413	-1.09443	-2.26781	-1.20796
Microglia-specific age-repressed	ENSMUSG00000055022.14	Cntn1	chr15	92051165	92341967	HAVANA	+	protein_coding	NA	NA	NA	NA	NA	NA	NA	NA	NA	NA	NA	NA	NA	NA	NA	NA	NA	NA	-2.53791	-1.71189	-2.33076	-1.38799
Microglia-specific age-repressed	ENSMUSG00000022783.11	Spag6l	chr16	16753016	16829456	HAVANA	-	protein_coding	NA	NA	NA	NA	NA	NA	NA	NA	NA	NA	NA	NA	NA	NA	NA	NA	NA	NA	-1.74426	-1.57534	-2.20846	-1.34212
Microglia-specific age-repressed	ENSMUSG00000072964.14	Bhlhb9	chrX	135797594	135891081	HAVANA	+	protein_coding	NA	NA	NA	NA	NA	NA	NA	NA	NA	NA	NA	NA	NA	NA	NA	NA	NA	NA	-1.06532	NA	-0.953239	NA
Microglia-specific age-repressed	ENSMUSG00000057715.13	A830018L16Rik	chr1	11414105	11975901	HAVANA	+	protein_coding	NA	NA	NA	NA	NA	NA	NA	NA	NA	NA	NA	NA	NA	NA	NA	NA	NA	NA	-2.32614	-1.2584	-3.72496	-1.56893
Microglia-specific age-repressed	ENSMUSG00000032332.17	Col12a1	chr9	79598991	79718831	HAVANA	-	protein_coding	NA	NA	NA	NA	NA	NA	NA	NA	NA	NA	NA	NA	NA	NA	NA	NA	NA	NA	-1.77164	-1.68198	-2.0435	-1.53382
Microglia-specific age-repressed	ENSMUSG00000071550.13	Cfap44	chr16	44394796	44482428	HAVANA	+	protein_coding	NA	NA	NA	NA	NA	NA	NA	NA	NA	NA	NA	NA	NA	NA	NA	NA	NA	NA	-2.45968	-1.47029	-1.53229	-1.94169
Microglia-specific age-repressed	ENSMUSG00000051043.16	Gprc5c	chr11	114851152	114872617	HAVANA	+	protein_coding	NA	NA	NA	NA	NA	NA	NA	NA	NA	NA	NA	NA	NA	NA	NA	NA	NA	NA	-1.34122	-0.992122	NA	NA
Microglia-specific age-repressed	ENSMUSG00000059810.18	Rgs3	chr4	62559847	62704001	HAVANA	+	protein_coding	NA	NA	NA	NA	NA	NA	NA	NA	NA	NA	NA	NA	NA	NA	NA	NA	NA	NA	-1.27227	NA	-0.977729	NA
Microglia-specific age-repressed	ENSMUSG00000033998.9	Kcnk1	chr8	125995170	126030685	HAVANA	+	protein_coding	NA	NA	NA	NA	NA	NA	NA	NA	NA	NA	NA	NA	NA	NA	NA	NA	NA	NA	-1.82973	-1.46814	-2.01513	-1.05657
Microglia-specific age-repressed	ENSMUSG00000019590.16	Cyb561	chr11	105933702	105953336	HAVANA	-	protein_coding	NA	NA	NA	NA	NA	NA	NA	NA	NA	NA	NA	NA	NA	NA	NA	NA	NA	NA	-1.56097	NA	-1.77604	-0.970972
Microglia-specific age-repressed	ENSMUSG00000049303.10	Syt12	chr19	4445908	4477447	HAVANA	-	protein_coding	NA	NA	NA	NA	NA	NA	NA	NA	NA	NA	NA	NA	NA	NA	NA	NA	NA	NA	-2.15762	-1.06209	-2.22736	-1.18037
Microglia-specific age-repressed	ENSMUSG00000016918.15	Sulf1	chr1	12692277	12861192	HAVANA	+	protein_coding	NA	NA	NA	NA	NA	NA	NA	NA	NA	NA	NA	NA	NA	NA	NA	NA	NA	NA	-1.8704	-1.24703	-2.00882	-1.26023
Microglia-specific age-repressed	ENSMUSG00000027656.7	Wisp2	chr2	163820861	163833146	HAVANA	+	protein_coding	NA	NA	NA	NA	NA	NA	NA	NA	NA	NA	NA	NA	NA	NA	NA	NA	NA	NA	-2.59919	-2.48658	-3.22978	-2.72514
Microglia-specific age-repressed	ENSMUSG00000073102.7	Drc1	chr5	30281388	30366695	HAVANA	+	protein_coding	NA	NA	NA	NA	NA	NA	NA	NA	NA	NA	NA	NA	NA	NA	NA	NA	NA	NA	-2.12011	-1.24223	-2.75397	-1.84577
Microglia-specific age-repressed	ENSMUSG00000024910.4	Ctsw	chr19	5465240	5468498	ENSEMBL	-	protein_coding	NA	NA	NA	NA	NA	NA	NA	NA	NA	NA	NA	NA	NA	NA	NA	NA	NA	NA	-2.27438	-1.87137	-1.72738	-1.3045
Microglia-specific age-repressed	ENSMUSG00000048482.14	Bdnf	chr2	109674700	109727007	HAVANA	+	protein_coding	NA	NA	NA	NA	NA	NA	NA	NA	NA	NA	NA	NA	NA	NA	NA	NA	NA	NA	-1.95952	-1.05528	-1.88774	-1.53934
Microglia-specific age-repressed	ENSMUSG00000030235.17	Slco1c1	chr6	141524368	141570177	HAVANA	+	protein_coding	NA	NA	NA	NA	NA	NA	NA	NA	NA	NA	NA	NA	NA	NA	NA	NA	NA	NA	-2.24696	-1.54721	-3.54409	-1.462
Microglia-specific age-repressed	ENSMUSG00000060176.3	Kif27	chr13	58287516	58354862	ENSEMBL	-	protein_coding	NA	NA	NA	NA	NA	NA	NA	NA	NA	NA	NA	NA	NA	NA	NA	NA	NA	NA	-1.56893	-1.50724	-1.17475	NA
Microglia-specific age-repressed	ENSMUSG00000024924.14	Vldlr	chr19	27216484	27254231	HAVANA	+	protein_coding	NA	NA	NA	NA	NA	NA	NA	NA	NA	NA	NA	NA	NA	NA	NA	NA	NA	NA	-1.6603	-0.936343	-1.93597	-1.06066
Microglia-specific age-repressed	ENSMUSG00000039676.3	Capsl	chr15	9436028	9466035	ENSEMBL	+	protein_coding	NA	NA	NA	NA	NA	NA	NA	NA	NA	NA	NA	NA	NA	NA	NA	NA	NA	NA	-1.93031	-1.59912	-1.56865	NA
Microglia-specific age-repressed	ENSMUSG00000022324.14	Matn2	chr15	34306680	34436242	ENSEMBL	+	protein_coding	NA	NA	NA	NA	NA	NA	NA	NA	NA	NA	NA	NA	NA	NA	NA	NA	NA	NA	-1.98919	-1.19867	-2.24113	-1.31879
Microglia-specific age-repressed	ENSMUSG00000034227.7	Foxj1	chr11	116330704	116335399	HAVANA	-	protein_coding	NA	NA	NA	NA	NA	NA	NA	NA	NA	NA	NA	NA	NA	NA	NA	NA	NA	NA	-1.56392	-1.18713	-1.52776	-1.0255
Microglia-specific age-repressed	ENSMUSG00000021696.8	Elovl7	chr13	108214404	108287105	ENSEMBL	+	protein_coding	NA	NA	NA	NA	NA	NA	NA	NA	NA	NA	NA	NA	NA	NA	NA	NA	NA	NA	-1.88562	-1.10295	-1.98792	-1.14332
Microglia-specific age-repressed	ENSMUSG00000028294.15	Cfap206	chr4	34688559	34730206	HAVANA	-	protein_coding	NA	NA	NA	NA	NA	NA	NA	NA	NA	NA	NA	NA	NA	NA	NA	NA	NA	NA	-1.93398	NA	-1.58106	-1.29765
Microglia-specific age-repressed	ENSMUSG00000039552.14	Rsph4a	chr10	33905111	33916021	HAVANA	+	protein_coding	NA	NA	NA	NA	NA	NA	NA	NA	NA	NA	NA	NA	NA	NA	NA	NA	NA	NA	-2.2128	-1.59614	-2.19598	NA
Microglia-specific age-repressed	ENSMUSG00000036949.16	Slc39a12	chr2	14388316	14494977	HAVANA	+	protein_coding	NA	NA	NA	NA	NA	NA	NA	NA	NA	NA	NA	NA	NA	NA	NA	NA	NA	NA	-1.75072	-1.22287	-1.95208	-1.17486
Microglia-specific age-repressed	ENSMUSG00000039114.15	Nrn1	chr13	36725625	36734477	HAVANA	-	protein_coding	NA	NA	NA	NA	NA	NA	NA	NA	NA	NA	NA	NA	NA	NA	NA	NA	NA	NA	-2.54869	-1.35249	-2.27926	NA
Microglia-specific age-repressed	ENSMUSG00000022203.6	Efs	chr14	54916543	54926788	ENSEMBL	-	protein_coding	NA	NA	NA	NA	NA	NA	NA	NA	NA	NA	NA	NA	NA	NA	NA	NA	NA	NA	-1.70365	-0.881544	-1.46623	NA
Microglia-specific age-repressed	ENSMUSG00000031760.9	Mt3	chr8	94152607	94154146	HAVANA	+	protein_coding	NA	NA	NA	NA	NA	NA	NA	NA	NA	NA	NA	NA	NA	NA	NA	NA	NA	NA	-1.69541	NA	-1.44629	-0.915358
Microglia-specific age-repressed	ENSMUSG00000051359.14	Ncald	chr15	37366175	37792570	HAVANA	-	protein_coding	NA	NA	NA	NA	NA	NA	NA	NA	NA	NA	NA	NA	NA	NA	NA	NA	NA	NA	-1.75553	NA	-1.27881	NA
Microglia-specific age-repressed	ENSMUSG00000041380.13	Htr2c	chrX	146962513	147197277	HAVANA	+	protein_coding	NA	NA	NA	NA	NA	NA	NA	NA	NA	NA	NA	NA	NA	NA	NA	NA	NA	NA	-2.35426	-1.23436	-2.66962	-1.40502
Microglia-specific age-repressed	ENSMUSG00000041809.5	Efhc1	chr1	20951626	20990841	HAVANA	+	protein_coding	NA	NA	NA	NA	NA	NA	NA	NA	NA	NA	NA	NA	NA	NA	NA	NA	NA	NA	-1.66309	-0.920397	-2.02166	NA
Microglia-specific age-repressed	ENSMUSG00000067818.6	Myl9	chr2	156775420	156781658	HAVANA	+	protein_coding	NA	NA	NA	NA	NA	NA	NA	NA	NA	NA	NA	NA	NA	NA	NA	NA	NA	NA	-1.90658	-1.59562	-1.45661	-1.29686
Microglia-specific age-repressed	ENSMUSG00000035032.12	Nek11	chr9	105162156	105395524	HAVANA	-	protein_coding	NA	NA	NA	NA	NA	NA	NA	NA	NA	NA	NA	NA	NA	NA	NA	NA	NA	NA	-1.99816	NA	-1.45885	NA
Microglia-specific age-repressed	ENSMUSG00000041957.15	Pkp2	chr16	16213318	16272712	HAVANA	+	protein_coding	NA	NA	NA	NA	NA	NA	NA	NA	NA	NA	NA	NA	NA	NA	NA	NA	NA	NA	-0.849324	NA	NA	NA
Microglia-specific age-repressed	ENSMUSG00000013419.7	Zfp651	chr9	121759330	121771742	HAVANA	+	protein_coding	NA	NA	NA	NA	NA	NA	NA	NA	NA	NA	NA	NA	NA	NA	NA	NA	NA	NA	-1.20508	NA	NA	NA
Microglia-specific age-repressed	ENSMUSG00000035390.16	Brsk1	chr7	4690604	4715997	HAVANA	+	protein_coding	NA	NA	NA	NA	NA	NA	NA	NA	NA	NA	NA	NA	NA	NA	NA	NA	NA	NA	-2.35627	NA	NA	-1.39541
Microglia-specific age-repressed	ENSMUSG00000018648.15	Dusp14	chr11	84048041	84069261	HAVANA	-	protein_coding	NA	NA	NA	NA	NA	NA	NA	NA	NA	NA	NA	NA	NA	NA	NA	NA	NA	NA	-1.38608	-0.865587	-0.939972	NA
Microglia-specific age-repressed	ENSMUSG00000046192.4	Iqub	chr6	24444865	24515067	HAVANA	-	protein_coding	NA	NA	NA	NA	NA	NA	NA	NA	NA	NA	NA	NA	NA	NA	NA	NA	NA	NA	-1.33794	-1.00869	-1.98486	-1.30888
Microglia-specific age-repressed	ENSMUSG00000018849.6	Wwc1	chr11	35838400	35980527	HAVANA	-	protein_coding	NA	NA	NA	NA	NA	NA	NA	NA	NA	NA	NA	NA	NA	NA	NA	NA	NA	NA	-1.91445	-1.47807	-1.96104	-1.30218
Microglia-specific age-repressed	ENSMUSG00000019851.8	Perp	chr10	18845020	18857073	HAVANA	+	protein_coding	NA	NA	NA	NA	NA	NA	NA	NA	NA	NA	NA	NA	NA	NA	NA	NA	NA	NA	-1.51764	-0.906356	-1.54567	-0.940012
Microglia-specific age-repressed	ENSMUSG00000038555.7	Reep2	chr18	34840589	34847463	ENSEMBL	+	protein_coding	NA	NA	NA	NA	NA	NA	NA	NA	NA	NA	NA	NA	NA	NA	NA	NA	NA	NA	-1.47389	-1.29547	-1.74507	-0.983021
Microglia-specific age-repressed	ENSMUSG00000034739.17	Mfrp	chr9	44101729	44109187	HAVANA	+	protein_coding	NA	NA	NA	NA	NA	NA	NA	NA	NA	NA	NA	NA	NA	NA	NA	NA	NA	NA	-1.80995	-1.14846	-1.63136	-1.38368
Microglia-specific age-repressed	ENSMUSG00000029378.5	Areg	chr5	91139599	91148432	HAVANA	+	protein_coding	NA	NA	NA	NA	NA	NA	NA	NA	NA	NA	NA	NA	NA	NA	NA	NA	NA	NA	-2.00374	NA	1.04437	0.923072
Microglia-specific age-repressed	ENSMUSG00000031786.7	Drc7	chr8	95055103	95078141	HAVANA	+	protein_coding	NA	NA	NA	NA	NA	NA	NA	NA	NA	NA	NA	NA	NA	NA	NA	NA	NA	NA	-1.8211	-1.19369	-2.74703	NA
Microglia-specific age-repressed	ENSMUSG00000039646.5	Vasn	chr16	4639941	4650802	HAVANA	+	protein_coding	NA	NA	NA	NA	NA	NA	NA	NA	NA	NA	NA	NA	NA	NA	NA	NA	NA	NA	-1.33398	NA	NA	NA
Microglia-specific age-repressed	ENSMUSG00000032373.15	Car12	chr9	66713686	66766845	HAVANA	+	protein_coding	NA	NA	NA	NA	NA	NA	NA	NA	NA	NA	NA	NA	NA	NA	NA	NA	NA	NA	-2.16974	-1.13639	-2.77548	NA
Microglia-specific age-repressed	ENSMUSG00000052397.8	Ezr	chr17	6738041	6782784	HAVANA	-	protein_coding	NA	NA	NA	NA	NA	NA	NA	NA	NA	NA	NA	NA	NA	NA	NA	NA	NA	NA	-0.88772	NA	NA	NA
Microglia-specific age-repressed	ENSMUSG00000027298.17	Tyro3	chr2	119797733	119818104	HAVANA	+	protein_coding	NA	NA	NA	NA	NA	NA	NA	NA	NA	NA	NA	NA	NA	NA	NA	NA	NA	NA	-1.46459	-0.847871	-0.978941	-0.858194
Microglia-specific age-repressed	ENSMUSG00000026546.16	Cfap45	chr1	172520801	172545870	HAVANA	+	protein_coding	NA	NA	NA	NA	NA	NA	NA	NA	NA	NA	NA	NA	NA	NA	NA	NA	NA	NA	-1.6595	-1.08066	-1.85001	-1.23421
Microglia-specific age-repressed	ENSMUSG00000031202.5	Rab39b	chrX	75572046	75578231	HAVANA	-	protein_coding	NA	NA	NA	NA	NA	NA	NA	NA	NA	NA	NA	NA	NA	NA	NA	NA	NA	NA	-1.63707	-1.1577	-1.77862	-0.945147
Microglia-specific age-repressed	ENSMUSG00000024909.14	Efemp2	chr19	5473973	5481853	HAVANA	+	protein_coding	NA	NA	NA	NA	NA	NA	NA	NA	NA	NA	NA	NA	NA	NA	NA	NA	NA	NA	-1.28196	NA	-1.31072	-0.926594
Microglia-specific age-repressed	ENSMUSG00000022206.6	Npr3	chr15	11839896	11905674	ENSEMBL	-	protein_coding	NA	NA	NA	NA	NA	NA	NA	NA	NA	NA	NA	NA	NA	NA	NA	NA	NA	NA	-1.61455	-1.03698	-1.88776	-0.916326
Microglia-specific age-repressed	ENSMUSG00000039202.12	Abhd2	chr7	79273199	79365508	HAVANA	+	protein_coding	NA	NA	NA	NA	NA	NA	NA	NA	NA	NA	NA	NA	NA	NA	NA	NA	NA	NA	-0.91287	NA	-1.07818	NA
Microglia-specific age-repressed	ENSMUSG00000023232.17	Serinc2	chr4	130253495	130279205	HAVANA	-	protein_coding	NA	NA	NA	NA	NA	NA	NA	NA	NA	NA	NA	NA	NA	NA	NA	NA	NA	NA	-1.49353	-1.1148	-1.44014	-0.935277
Microglia-specific age-repressed	ENSMUSG00000028572.13	Hook1	chr4	95967240	96025413	HAVANA	+	protein_coding	NA	NA	NA	NA	NA	NA	NA	NA	NA	NA	NA	NA	NA	NA	NA	NA	NA	NA	-1.73314	-1.08881	-1.672	-1.29647
Microglia-specific age-repressed	ENSMUSG00000044835.15	Ankrd45	chr1	161142691	161170498	HAVANA	+	protein_coding	NA	NA	NA	NA	NA	NA	NA	NA	NA	NA	NA	NA	NA	NA	NA	NA	NA	NA	-1.76886	-1.02983	-1.9289	-1.02197
Microglia-specific age-repressed	ENSMUSG00000031548.7	Sfrp1	chr8	23411502	23449632	HAVANA	+	protein_coding	NA	NA	NA	NA	NA	NA	NA	NA	NA	NA	NA	NA	NA	NA	NA	NA	NA	NA	-2.49664	-1.53248	-2.94793	-1.48908
Microglia-specific age-repressed	ENSMUSG00000030102.11	Itpr1	chr6	108213096	108551109	HAVANA	+	protein_coding	NA	NA	NA	NA	NA	NA	NA	NA	NA	NA	NA	NA	NA	NA	NA	NA	NA	NA	-0.953006	NA	-1.09864	NA
Microglia-specific age-repressed	ENSMUSG00000052387.15	Trpm3	chr19	22139119	22989884	ENSEMBL	+	protein_coding	NA	NA	NA	NA	NA	NA	NA	NA	NA	NA	NA	NA	NA	NA	NA	NA	NA	NA	-2.09651	-1.32017	-2.18355	-1.25515
Microglia-specific age-repressed	ENSMUSG00000020297.10	Nsg2	chr11	32000463	32059202	HAVANA	+	protein_coding	NA	NA	NA	NA	NA	NA	NA	NA	NA	NA	NA	NA	NA	NA	NA	NA	NA	NA	-2.30768	-1.55478	-1.82862	-1.56928
Microglia-specific age-repressed	ENSMUSG00000056174.8	Col8a2	chr4	126286793	126314330	HAVANA	+	protein_coding	NA	NA	NA	NA	NA	NA	NA	NA	NA	NA	NA	NA	NA	NA	NA	NA	NA	NA	-1.89267	-1.03346	-2.27136	NA
Microglia-specific age-repressed	ENSMUSG00000029093.14	Sorcs2	chr5	36017180	36398139	HAVANA	-	protein_coding	NA	NA	NA	NA	NA	NA	NA	NA	NA	NA	NA	NA	NA	NA	NA	NA	NA	NA	-1.87694	-1.03562	-1.71465	NA
Microglia-specific age-repressed	ENSMUSG00000021950.15	Anxa8	chr14	34085981	34100571	HAVANA	+	protein_coding	NA	NA	NA	NA	NA	NA	NA	NA	NA	NA	NA	NA	NA	NA	NA	NA	NA	NA	-3.12154	NA	-2.82324	NA
Microglia-specific age-repressed	ENSMUSG00000001663.10	Gstt1	chr10	75783813	75798584	HAVANA	-	protein_coding	NA	NA	NA	NA	NA	NA	NA	NA	NA	NA	NA	NA	NA	NA	NA	NA	NA	NA	-2.26159	NA	-2.34023	NA
Microglia-specific age-repressed	ENSMUSG00000027676.11	Ccdc39	chr3	33812362	33844310	HAVANA	-	protein_coding	NA	NA	NA	NA	NA	NA	NA	NA	NA	NA	NA	NA	NA	NA	NA	NA	NA	NA	-1.56639	NA	-1.69377	-1.04015
Microglia-specific age-repressed	ENSMUSG00000034467.7	Dynlrb2	chr8	116504974	116515915	HAVANA	+	protein_coding	NA	NA	NA	NA	NA	NA	NA	NA	NA	NA	NA	NA	NA	NA	NA	NA	NA	NA	-2.47116	NA	-2.31037	NA
Microglia-specific age-repressed	ENSMUSG00000042515.13	Mum1l1	chrX	139210042	139238335	HAVANA	+	protein_coding	NA	NA	NA	NA	NA	NA	NA	NA	NA	NA	NA	NA	NA	NA	NA	NA	NA	NA	-1.50376	-0.995236	-2.35535	-1.08952
Microglia-specific age-repressed	ENSMUSG00000021848.15	Otx2	chr14	48657679	48667644	HAVANA	-	protein_coding	NA	NA	NA	NA	NA	NA	NA	NA	NA	NA	NA	NA	NA	NA	NA	NA	NA	NA	-1.6478	-0.961502	-1.41457	NA
Microglia-specific age-repressed	ENSMUSG00000057969.15	Sema3b	chr9	107597674	107609229	HAVANA	-	protein_coding	NA	NA	NA	NA	NA	NA	NA	NA	NA	NA	NA	NA	NA	NA	NA	NA	NA	NA	-1.50703	NA	-1.64753	NA
Microglia-specific age-repressed	ENSMUSG00000027257.13	Pacsin3	chr2	91255954	91264679	HAVANA	+	protein_coding	NA	NA	NA	NA	NA	NA	NA	NA	NA	NA	NA	NA	NA	NA	NA	NA	NA	NA	-1.35933	NA	-1.14807	NA
Microglia-specific age-repressed	ENSMUSG00000034687.8	Fras1	chr5	96373955	96784728	HAVANA	+	protein_coding	NA	NA	NA	NA	NA	NA	NA	NA	NA	NA	NA	NA	NA	NA	NA	NA	NA	NA	-1.37608	-1.20536	-1.75162	-1.38053
Microglia-specific age-repressed	ENSMUSG00000024665.7	Fads2	chr19	10064164	10101503	ENSEMBL	-	protein_coding	NA	NA	NA	NA	NA	NA	NA	NA	NA	NA	NA	NA	NA	NA	NA	NA	NA	NA	-1.98814	-1.4768	-1.87139	-1.44245
Microglia-specific age-repressed	ENSMUSG00000044033.16	Ccdc141	chr2	77009902	77170636	HAVANA	-	protein_coding	NA	NA	NA	NA	NA	NA	NA	NA	NA	NA	NA	NA	NA	NA	NA	NA	NA	NA	-1.6905	-1.18896	-1.82553	-0.95485
Microglia-specific age-repressed	ENSMUSG00000029386.15	Tctn2	chr5	124598749	124627738	HAVANA	+	processed_transcript	NA	NA	NA	NA	NA	NA	NA	NA	NA	NA	NA	NA	NA	NA	NA	NA	NA	NA	-1.4531	-0.82306	-1.70174	-0.936392
Microglia-specific age-repressed	ENSMUSG00000012428.9	Steap4	chr5	7960457	7982213	HAVANA	+	protein_coding	NA	NA	NA	NA	NA	NA	NA	NA	NA	NA	NA	NA	NA	NA	NA	NA	NA	NA	-2.67656	-1.51053	-2.51874	NA
Microglia-specific age-repressed	ENSMUSG00000079037.9	Prnp	chr2	131909928	131938429	HAVANA	+	protein_coding	NA	NA	NA	NA	NA	NA	NA	NA	NA	NA	NA	NA	NA	NA	NA	NA	NA	0.877608	-1.24447	NA	-1.30435	NA
Microglia-specific age-repressed	ENSMUSG00000044393.15	Dsg2	chr18	20558074	20604521	HAVANA	+	protein_coding	NA	NA	NA	NA	NA	NA	NA	NA	NA	NA	NA	NA	NA	NA	NA	NA	NA	NA	-1.42127	NA	-1.6505	-1.22895
Microglia-specific age-repressed	ENSMUSG00000039323.18	Igfbp2	chr1	72824503	72852474	HAVANA	+	protein_coding	NA	NA	NA	NA	NA	NA	NA	NA	NA	NA	NA	NA	NA	NA	NA	NA	NA	NA	-1.40075	-1.33974	-1.39348	-1.36091
Microglia-specific age-repressed	ENSMUSG00000027171.10	Prrg4	chr2	104830741	104849876	HAVANA	-	protein_coding	NA	NA	NA	NA	NA	NA	NA	NA	NA	NA	NA	NA	NA	NA	NA	NA	NA	NA	-1.26193	-0.804926	-1.21312	NA
Microglia-specific age-repressed	ENSMUSG00000028273.15	Pdlim5	chr3	142239590	142395696	HAVANA	-	protein_coding	NA	NA	NA	NA	NA	NA	NA	NA	NA	NA	NA	NA	NA	NA	NA	NA	NA	NA	-0.89512	NA	-0.848791	NA
Microglia-specific age-repressed	ENSMUSG00000038816.14	Ctnnal1	chr4	56810935	56865188	HAVANA	-	protein_coding	NA	NA	NA	NA	NA	NA	NA	NA	NA	NA	NA	NA	NA	NA	NA	NA	NA	NA	-1.47571	-0.920894	-1.16256	-0.84103
Microglia-specific age-repressed	ENSMUSG00000022865.13	Cxadr	chr16	78301496	78359785	HAVANA	+	protein_coding	NA	NA	NA	NA	NA	NA	NA	NA	NA	NA	NA	NA	NA	NA	NA	NA	NA	NA	-1.69873	-1.09215	-2.03195	-1.1421
Microglia-specific age-repressed	ENSMUSG00000026308.8	Klhl30	chr1	91351016	91362416	HAVANA	+	protein_coding	NA	NA	NA	NA	NA	NA	NA	NA	NA	NA	NA	NA	NA	NA	NA	NA	NA	NA	-1.64062	-1.25674	-0.915234	-1.587
Microglia-specific age-repressed	ENSMUSG00000039252.11	Lgi2	chr5	52533517	52566462	HAVANA	-	protein_coding	NA	NA	NA	NA	NA	NA	NA	NA	NA	NA	NA	NA	NA	NA	NA	NA	NA	NA	-2.5804	-2.34342	-3.52194	-2.01003
Microglia-specific age-repressed	ENSMUSG00000032346.7	Ooep	chr9	78376109	78378725	HAVANA	-	protein_coding	NA	NA	NA	NA	NA	NA	NA	NA	NA	NA	NA	NA	NA	NA	NA	NA	NA	NA	-2.00367	-1.14995	-1.85457	-1.11604
Microglia-specific age-repressed	ENSMUSG00000032246.14	Calml4	chr9	62858080	62875921	HAVANA	+	protein_coding	NA	NA	NA	NA	NA	NA	NA	NA	NA	NA	NA	NA	NA	NA	NA	NA	NA	NA	-2.13888	NA	-2.63552	NA
Microglia-specific age-repressed	ENSMUSG00000020000.7	Moxd1	chr10	24223517	24302790	HAVANA	+	protein_coding	NA	NA	NA	NA	NA	NA	NA	NA	NA	NA	NA	NA	NA	NA	NA	NA	NA	NA	-2.49735	NA	-2.63478	NA
Microglia-specific age-repressed	ENSMUSG00000041220.10	Elovl6	chr3	129532355	129638495	HAVANA	+	protein_coding	NA	NA	NA	NA	NA	NA	NA	NA	NA	NA	NA	NA	NA	NA	NA	NA	NA	NA	-1.16067	-0.883177	-1.20838	-0.87848
Microglia-specific age-repressed	ENSMUSG00000000881.12	Dlg3	chrX	100767722	100818410	HAVANA	+	protein_coding	NA	NA	NA	NA	NA	NA	NA	NA	NA	NA	NA	NA	NA	NA	NA	NA	NA	NA	-0.881812	NA	-0.865747	NA
Microglia-specific age-repressed	ENSMUSG00000032224.15	Fam81a	chr9	70088511	70142560	HAVANA	-	protein_coding	NA	NA	NA	NA	NA	NA	NA	NA	NA	NA	NA	NA	NA	NA	NA	NA	NA	NA	-1.81738	-1.46845	-1.78165	-1.40724
Microglia-specific age-repressed	ENSMUSG00000015405.15	Ace2	chrX	164139332	164188420	HAVANA	+	protein_coding	NA	NA	NA	NA	NA	NA	NA	NA	NA	NA	NA	NA	NA	NA	NA	NA	NA	NA	-1.87844	-1.29027	-2.13872	-1.60423
Microglia-specific age-repressed	ENSMUSG00000028150.14	Rorc	chr3	94372794	94398276	HAVANA	+	protein_coding	NA	NA	NA	NA	NA	NA	NA	NA	NA	NA	NA	NA	NA	NA	NA	NA	NA	NA	-2.64202	NA	-1.93753	NA
Microglia-specific age-repressed	ENSMUSG00000031239.5	Itm2a	chrX	107397099	107403376	HAVANA	-	protein_coding	NA	NA	NA	NA	NA	NA	NA	NA	NA	NA	NA	NA	NA	NA	NA	NA	NA	NA	-1.85926	NA	-2.01196	NA
Microglia-specific age-repressed	ENSMUSG00000001763.14	Tspan33	chr6	29694222	29718559	HAVANA	+	protein_coding	NA	NA	NA	NA	NA	NA	NA	NA	NA	NA	NA	NA	NA	NA	NA	NA	NA	NA	-1.74216	NA	-1.43228	NA
Microglia-specific age-repressed	ENSMUSG00000056870.9	Gulp1	chr1	44551511	44796838	HAVANA	+	protein_coding	NA	NA	NA	NA	NA	NA	NA	NA	NA	NA	NA	NA	NA	NA	NA	NA	NA	NA	-1.68684	-1.02209	-1.447	NA
Microglia-specific age-repressed	ENSMUSG00000053783.5	1700016K19Rik	chr11	75999912	76003569	HAVANA	+	protein_coding	NA	NA	NA	NA	NA	NA	NA	NA	NA	NA	NA	NA	NA	NA	NA	NA	NA	NA	-2.19111	NA	-3.25665	NA
Microglia-specific age-repressed	ENSMUSG00000060961.14	Slc4a4	chr5	88886818	89239653	HAVANA	+	protein_coding	NA	NA	NA	NA	NA	NA	NA	NA	NA	NA	NA	NA	NA	NA	NA	NA	NA	NA	-2.37897	NA	-3.16498	-1.46964
Microglia-specific age-repressed	ENSMUSG00000059049.14	Frem1	chr4	82897920	83052339	HAVANA	-	protein_coding	NA	NA	NA	NA	NA	NA	NA	NA	NA	NA	NA	NA	NA	NA	NA	NA	NA	NA	-1.88586	NA	-2.24246	NA
Microglia-specific age-repressed	ENSMUSG00000054196.6	Cthrc1	chr15	39076932	39087121	HAVANA	+	protein_coding	NA	NA	NA	NA	NA	NA	NA	NA	NA	NA	NA	NA	NA	NA	NA	NA	NA	NA	-1.25436	-1.23553	-1.1851	-1.04883
Microglia-specific age-repressed	ENSMUSG00000022949.9	Clic6	chr16	92485736	92541243	HAVANA	+	protein_coding	NA	NA	NA	NA	NA	NA	NA	NA	NA	NA	NA	NA	NA	NA	NA	NA	NA	NA	-1.70879	-1.1028	-1.91411	-1.09379
Microglia-specific age-repressed	ENSMUSG00000032324.11	Tspan3	chr9	56131725	56165477	HAVANA	-	protein_coding	NA	NA	NA	NA	NA	NA	NA	NA	NA	NA	NA	NA	NA	NA	NA	NA	NA	NA	-0.920202	NA	-0.991144	NA
Microglia-specific age-repressed	ENSMUSG00000022594.14	Lynx1	chr15	74747852	74753046	HAVANA	-	protein_coding	NA	NA	NA	NA	NA	NA	NA	NA	NA	NA	NA	NA	NA	NA	NA	NA	NA	NA	-1.6801	NA	-1.49567	-1.40985
Microglia-specific age-repressed	ENSMUSG00000026241.5	Nppc	chr1	86666291	86670571	HAVANA	-	protein_coding	NA	NA	NA	NA	NA	NA	NA	NA	NA	NA	NA	NA	NA	NA	NA	NA	NA	NA	-2.31517	NA	-1.91009	NA
Microglia-specific age-repressed	ENSMUSG00000032006.15	Pdgfd	chr9	6168584	6378850	HAVANA	+	protein_coding	NA	NA	NA	NA	NA	NA	NA	NA	NA	NA	NA	NA	NA	NA	NA	NA	NA	NA	-1.6483	-1.31102	-1.7203	-1.21217
Microglia-specific age-repressed	ENSMUSG00000039419.17	Cntnap2	chr6	45059357	47304213	HAVANA	+	protein_coding	NA	NA	NA	NA	NA	NA	NA	NA	NA	NA	NA	NA	NA	NA	NA	NA	NA	NA	-1.61735	NA	-1.63842	-0.992935
Microglia-specific age-repressed	ENSMUSG00000036570.14	Fxyd1	chr7	31051678	31057199	HAVANA	-	protein_coding	NA	NA	NA	NA	NA	NA	NA	NA	NA	NA	NA	NA	NA	NA	NA	NA	NA	NA	-2.02917	-1.39278	-1.80333	-1.6159
Microglia-specific age-repressed	ENSMUSG00000015090.13	Ptgds	chr2	25466709	25470046	HAVANA	-	protein_coding	NA	NA	NA	NA	NA	NA	NA	NA	NA	NA	NA	NA	NA	NA	NA	NA	NA	NA	-1.37098	NA	-1.37071	NA
Microglia-specific age-repressed	ENSMUSG00000002831.13	Plin4	chr17	56100591	56109803	HAVANA	-	protein_coding	NA	NA	NA	NA	NA	NA	NA	NA	NA	NA	NA	NA	NA	NA	NA	NA	NA	NA	-2.05383	-1.24744	-2.49876	-1.34562
Microglia-specific age-repressed	ENSMUSG00000028047.11	Thbs3	chr3	89215180	89226837	HAVANA	+	protein_coding	NA	NA	NA	NA	NA	NA	NA	NA	NA	NA	NA	NA	NA	NA	NA	NA	NA	NA	-1.64334	-1.30231	-1.40457	-1.21192
Microglia-specific age-repressed	ENSMUSG00000028789.16	Azin2	chr4	128930233	128962442	HAVANA	-	protein_coding	NA	NA	NA	NA	NA	NA	NA	NA	NA	NA	NA	NA	NA	NA	NA	NA	NA	NA	-1.40348	NA	-1.41075	NA
Microglia-specific age-repressed	ENSMUSG00000060227.15	Casc4	chr2	121866970	121936220	HAVANA	+	protein_coding	NA	NA	NA	NA	NA	NA	NA	NA	NA	NA	NA	NA	NA	NA	NA	NA	NA	NA	-1.07161	-0.940023	-1.2671	NA
Microglia-specific age-repressed	ENSMUSG00000032086.12	Bace1	chr9	45838580	45864399	HAVANA	+	protein_coding	NA	NA	NA	NA	NA	NA	NA	NA	NA	NA	NA	NA	NA	NA	NA	NA	NA	NA	-1.08666	NA	-1.05914	-0.942826
Microglia-specific age-repressed	ENSMUSG00000089661.9	Mia	chr7	27179742	27181157	HAVANA	-	protein_coding	NA	NA	NA	NA	NA	NA	NA	NA	NA	NA	NA	NA	NA	NA	NA	NA	NA	NA	-2.31551	NA	-1.58467	-1.96328
Microglia-specific age-repressed	ENSMUSG00000110332.1	Gm45396	chr8	90816145	90817393	HAVANA	-	protein_coding	NA	NA	NA	NA	NA	NA	NA	NA	NA	NA	NA	NA	NA	NA	NA	NA	NA	NA	-1.71726	NA	-1.57156	NA
Microglia-specific age-repressed	ENSMUSG00000015222.17	Map2	chr1	66175273	66442583	HAVANA	+	protein_coding	NA	NA	NA	NA	NA	NA	NA	NA	NA	NA	NA	NA	NA	NA	NA	NA	NA	NA	-1.39255	-1.31593	-1.58869	-1.16386
Microglia-specific age-repressed	ENSMUSG00000022037.14	Clu	chr14	65968483	65981548	HAVANA	+	protein_coding	NA	NA	NA	NA	NA	NA	NA	NA	NA	NA	NA	NA	NA	NA	NA	NA	NA	NA	-1.64655	-1.21311	-1.68223	-1.13395
Microglia-specific age-repressed	ENSMUSG00000024500.18	Ppp2r2b	chr18	42637432	43059471	HAVANA	-	protein_coding	NA	NA	NA	NA	NA	NA	NA	NA	NA	NA	NA	NA	NA	NA	NA	NA	NA	NA	-2.01987	-1.52552	-3.051	-1.39135
Microglia-specific age-repressed	ENSMUSG00000024597.10	Slc12a2	chr18	57878678	57946821	ENSEMBL	+	protein_coding	NA	NA	NA	NA	NA	NA	NA	NA	NA	NA	NA	NA	NA	NA	NA	NA	NA	NA	-1.05717	NA	-1.345	NA
Microglia-specific age-repressed	ENSMUSG00000061718.12	Ppp1r1b	chr11	98348404	98357796	HAVANA	+	protein_coding	NA	NA	NA	NA	NA	NA	NA	NA	NA	NA	NA	NA	NA	NA	NA	NA	NA	NA	-2.7285	-1.96421	-2.43358	-1.92621
Microglia-specific age-repressed	ENSMUSG00000024736.14	Tmem132a	chr19	10857822	10869940	HAVANA	-	protein_coding	NA	NA	NA	NA	NA	NA	NA	NA	NA	NA	NA	NA	NA	NA	NA	NA	NA	NA	-0.972734	NA	-1.01922	-0.803006
Microglia-specific age-repressed	ENSMUSG00000038119.15	Cdon	chr9	35421128	35507652	HAVANA	+	protein_coding	NA	NA	NA	NA	NA	NA	NA	NA	NA	NA	NA	NA	NA	NA	NA	NA	NA	NA	-2.15283	-1.28329	-2.24761	NA
Microglia-specific age-repressed	ENSMUSG00000046442.4	Ppm1e	chr11	87226906	87359023	HAVANA	-	protein_coding	NA	NA	NA	NA	NA	NA	NA	NA	NA	NA	NA	NA	NA	NA	NA	NA	NA	NA	-1.25806	-1.06818	-1.47464	-1.469
Microglia-specific age-repressed	ENSMUSG00000031112.10	Stk26	chrX	50841047	50893097	HAVANA	+	protein_coding	NA	NA	NA	NA	NA	NA	NA	NA	NA	NA	NA	NA	NA	NA	NA	NA	NA	NA	-1.6227	-1.26838	-1.51437	NA
Microglia-specific age-repressed	ENSMUSG00000026051.8	1500015O10Rik	chr1	43730602	43742578	HAVANA	+	protein_coding	NA	NA	NA	NA	NA	NA	NA	NA	NA	NA	NA	NA	NA	NA	NA	NA	NA	NA	-1.79911	-1.0961	-1.84177	-1.15427
Microglia-specific age-repressed	ENSMUSG00000094708.1	Gm10359	chr5	105862701	105863702	HAVANA	-	processed_pseudogene	NA	NA	NA	NA	NA	NA	NA	NA	NA	NA	NA	NA	NA	NA	NA	NA	NA	NA	-6.80545	NA	NA	-6.26753
Microglia-specific age-repressed	ENSMUSG00000067242.11	Lgi1	chr19	38264536	38312214	HAVANA	+	protein_coding	NA	NA	NA	NA	NA	NA	NA	NA	NA	NA	NA	NA	NA	NA	NA	NA	NA	NA	-2.13366	NA	-1.96348	NA
Microglia-specific age-repressed	ENSMUSG00000045284.9	Dcaf12l1	chrX	44786570	44790197	HAVANA	-	protein_coding	NA	NA	NA	NA	NA	NA	NA	NA	NA	NA	NA	NA	NA	NA	NA	NA	NA	NA	-1.85297	-1.47739	-1.84485	NA
Microglia-specific age-repressed	ENSMUSG00000022894.5	Adamts5	chr16	85858170	85901125	ENSEMBL	-	protein_coding	NA	NA	NA	NA	NA	NA	NA	NA	NA	NA	NA	NA	NA	NA	NA	NA	NA	NA	-2.81969	NA	-3.29841	NA
Microglia-specific age-repressed	ENSMUSG00000038963.15	Slco4a1	chr2	180456245	180474867	HAVANA	+	protein_coding	NA	NA	NA	NA	NA	NA	NA	NA	NA	NA	NA	NA	NA	NA	NA	NA	NA	NA	-0.884686	NA	NA	-0.985578
Microglia-specific age-repressed	ENSMUSG00000048644.8	Ctxn1	chr8	4257660	4259274	HAVANA	-	protein_coding	NA	NA	NA	NA	NA	NA	NA	NA	NA	NA	NA	NA	NA	NA	NA	NA	NA	NA	-1.7966	NA	-1.66574	-1.20346
Microglia-specific age-repressed	ENSMUSG00000019856.14	Fam184a	chr10	53633145	53751123	HAVANA	-	protein_coding	NA	NA	NA	NA	NA	NA	NA	NA	NA	NA	NA	NA	NA	NA	NA	NA	NA	NA	-1.79074	-1.19027	-1.91348	-1.22884
Microglia-specific age-repressed	ENSMUSG00000039542.16	Ncam1	chr9	49502136	49798925	HAVANA	-	protein_coding	NA	NA	NA	NA	NA	NA	NA	NA	NA	NA	NA	NA	NA	NA	NA	NA	NA	NA	-1.30361	-1.24346	-1.49916	-1.14051
Microglia-specific age-repressed	ENSMUSG00000058488.7	Kl	chr5	150952607	150993817	HAVANA	+	protein_coding	NA	NA	NA	NA	NA	NA	NA	NA	NA	NA	NA	NA	NA	NA	NA	NA	NA	NA	-1.98346	NA	-1.80185	-1.65502
Microglia-specific age-repressed	ENSMUSG00000027983.13	Cyp2u1	chr3	131288441	131303227	HAVANA	-	protein_coding	NA	NA	NA	NA	NA	NA	NA	NA	NA	NA	NA	NA	NA	NA	NA	NA	NA	NA	-1.25174	NA	-1.05723	-0.932612
Microglia-specific age-repressed	ENSMUSG00000041548.4	Hspb8	chr5	116408491	116422864	HAVANA	-	protein_coding	NA	NA	NA	NA	NA	NA	NA	NA	NA	NA	NA	NA	NA	NA	NA	NA	NA	NA	-1.45185	-0.896732	-1.36707	NA
Microglia-specific age-repressed	ENSMUSG00000022297.14	Fzd6	chr15	39006280	39038186	ENSEMBL	+	protein_coding	NA	NA	NA	NA	NA	NA	NA	NA	NA	NA	NA	NA	NA	NA	NA	NA	NA	NA	-1.34838	-0.919652	-1.39007	-0.982091
Microglia-specific age-repressed	ENSMUSG00000029675.12	Eln	chr5	134702593	134747323	HAVANA	-	protein_coding	NA	NA	NA	NA	NA	NA	NA	NA	NA	NA	NA	NA	NA	NA	NA	NA	NA	NA	-2.52509	-2.09158	-3.03142	-2.97488
Microglia-specific age-repressed	ENSMUSG00000045954.7	Sdpr	chr1	51289126	51302960	HAVANA	+	protein_coding	NA	NA	NA	NA	NA	NA	NA	NA	NA	NA	NA	NA	NA	NA	NA	NA	NA	NA	-1.43462	-1.54933	-1.41237	-1.62324
Microglia-specific age-repressed	ENSMUSG00000000296.8	Tpd52l1	chr10	31332376	31445958	HAVANA	-	protein_coding	NA	NA	NA	NA	NA	NA	NA	NA	NA	NA	NA	NA	NA	NA	NA	NA	NA	NA	-2.10594	NA	-2.07149	NA
Microglia-specific age-repressed	ENSMUSG00000026649.14	Cfap126	chr1	171113918	171126967	HAVANA	+	protein_coding	NA	NA	NA	NA	NA	NA	NA	NA	NA	NA	NA	NA	NA	NA	NA	NA	NA	NA	-1.70205	NA	-1.67155	-1.08473
Microglia-specific age-repressed	ENSMUSG00000027919.5	Lce1g	chr3	92750148	92752338	HAVANA	-	protein_coding	NA	NA	NA	NA	NA	NA	NA	NA	NA	NA	NA	NA	NA	NA	NA	NA	NA	NA	-1.85366	-1.76247	-1.96118	-2.39338
Microglia-specific age-repressed	ENSMUSG00000048583.16	Igf2	chr7	142650766	142666816	HAVANA	-	protein_coding	NA	NA	NA	NA	NA	NA	NA	NA	NA	NA	NA	NA	NA	NA	NA	NA	NA	NA	-2.19817	-1.44753	-2.34707	-1.54331
Microglia-specific age-repressed	ENSMUSG00000050334.12	C130071C03Rik	chr13	83721381	83884194	HAVANA	+	lincRNA	NA	NA	NA	NA	NA	NA	NA	NA	NA	NA	NA	NA	NA	NA	NA	NA	NA	NA	-1.82318	-1.16407	-1.37905	NA
Microglia-specific age-repressed	ENSMUSG00000038859.7	Baiap2l1	chr5	144264526	144358112	HAVANA	-	protein_coding	NA	NA	NA	NA	NA	NA	NA	NA	NA	NA	NA	NA	NA	NA	NA	NA	NA	NA	-1.34971	-0.945431	-1.32104	NA
Microglia-specific age-repressed	ENSMUSG00000068617.4	Efcab1	chr16	14906637	14925879	ENSEMBL	+	protein_coding	NA	NA	NA	NA	NA	NA	NA	NA	NA	NA	NA	NA	NA	NA	NA	NA	NA	NA	-1.74237	-1.09849	-1.50268	-1.16395
Microglia-specific age-repressed	ENSMUSG00000010136.14	Pifo	chr3	105996957	106014646	HAVANA	-	protein_coding	NA	NA	NA	NA	NA	NA	NA	NA	NA	NA	NA	NA	NA	NA	NA	NA	NA	NA	-1.3886	-1.24516	-1.92293	-1.1124
Microglia-specific age-repressed	ENSMUSG00000033585.5	Ndn	chr7	62346569	62350262	HAVANA	+	protein_coding	NA	NA	NA	NA	NA	NA	NA	NA	NA	NA	NA	NA	NA	NA	NA	NA	NA	NA	-1.94922	-1.52917	-2.08922	-1.24039
Microglia-specific age-repressed	ENSMUSG00000062184.11	Hs6st2	chrX	51387212	51681856	HAVANA	-	protein_coding	NA	NA	NA	NA	NA	NA	NA	NA	NA	NA	NA	NA	NA	NA	NA	NA	NA	NA	-1.62456	-1.30924	-1.81785	-1.20753
Microglia-specific age-repressed	ENSMUSG00000068196.4	Col8a1	chr16	57624258	57754737	HAVANA	-	protein_coding	NA	NA	NA	NA	NA	NA	NA	NA	NA	NA	NA	NA	NA	NA	NA	NA	NA	NA	-1.48308	-1.01983	-1.45001	-0.935962
Microglia-specific age-repressed	ENSMUSG00000027499.12	Pkia	chr3	7366669	7445366	HAVANA	+	protein_coding	NA	NA	NA	NA	NA	NA	NA	NA	NA	NA	NA	NA	NA	NA	NA	NA	NA	NA	-1.37058	-1.21413	-1.32473	-1.18865
Microglia-specific age-repressed	ENSMUSG00000046844.6	Vat1l	chr8	114205612	114374071	HAVANA	+	protein_coding	NA	NA	NA	NA	NA	NA	NA	NA	NA	NA	NA	NA	NA	NA	NA	NA	NA	NA	-1.81048	-1.09873	-1.95576	-1.09412
Microglia-specific age-repressed	ENSMUSG00000041831.15	Sytl3	chr17	6673458	6738042	HAVANA	+	protein_coding	NA	NA	NA	NA	NA	NA	NA	NA	NA	NA	NA	NA	NA	NA	NA	NA	NA	NA	-1.8312	NA	-2.03066	-1.28874
Microglia-specific age-repressed	ENSMUSG00000015354.8	Pcolce2	chr9	95637601	95698096	HAVANA	+	protein_coding	NA	NA	NA	NA	NA	NA	NA	NA	NA	NA	NA	NA	NA	NA	NA	NA	NA	NA	-1.59042	-0.969614	-1.66297	NA
Microglia-specific age-repressed	ENSMUSG00000024253.8	Dync2li1	chr17	84626496	84655558	ENSEMBL	+	protein_coding	NA	NA	NA	NA	NA	NA	NA	NA	NA	NA	NA	NA	NA	NA	NA	NA	NA	NA	-1.32434	NA	-1.59814	NA
Microglia-specific age-repressed	ENSMUSG00000017723.11	Wfdc2	chr2	164562413	164568510	HAVANA	+	protein_coding	NA	NA	NA	NA	NA	NA	NA	NA	NA	NA	NA	NA	NA	NA	NA	NA	NA	NA	-1.9021	NA	-2.01488	NA
Microglia-specific age-repressed	ENSMUSG00000037060.3	Prkcdbp	chr7	105480083	105482300	HAVANA	-	protein_coding	NA	NA	NA	NA	NA	NA	NA	NA	NA	NA	NA	NA	NA	NA	NA	NA	NA	NA	-1.34641	NA	-0.869909	NA
Microglia-specific age-repressed	ENSMUSG00000046402.10	Rbp1	chr9	98422961	98446575	HAVANA	+	protein_coding	NA	NA	NA	NA	NA	NA	NA	NA	NA	NA	NA	NA	NA	NA	NA	NA	NA	NA	-1.75157	NA	-1.65839	NA
Microglia-specific age-repressed	ENSMUSG00000025268.15	Maged2	chrX	150806370	150814345	HAVANA	-	protein_coding	NA	NA	NA	NA	NA	NA	NA	NA	NA	-1.59557	NA	-1.25816	NA	NA	NA	-1.09347	NA	NA	-0.943086	NA	-0.923694	NA
Microglia-specific age-repressed	ENSMUSG00000074227.12	Spint2	chr7	29256323	29281912	HAVANA	-	protein_coding	NA	NA	NA	NA	NA	NA	NA	NA	NA	1.99823	NA	NA	NA	NA	NA	NA	NA	NA	-1.62753	NA	-1.58369	-1.05305
Microglia-specific age-repressed	ENSMUSG00000042834.14	Nrep	chr18	33437019	33464029	ENSEMBL	-	protein_coding	NA	NA	NA	NA	NA	NA	NA	NA	NA	NA	NA	NA	NA	NA	NA	NA	NA	NA	-1.06975	NA	-0.931264	NA
Microglia-specific age-repressed	ENSMUSG00000021994.14	Wnt5a	chr14	28504750	28527447	HAVANA	+	protein_coding	NA	NA	NA	NA	NA	NA	NA	NA	NA	NA	NA	NA	NA	NA	NA	NA	NA	NA	-2.29792	NA	-1.68621	NA
Microglia-specific age-repressed	ENSMUSG00000048108.13	Tmem72	chr6	116679063	116716913	HAVANA	-	protein_coding	NA	NA	NA	NA	NA	NA	NA	NA	NA	NA	NA	NA	NA	NA	NA	NA	NA	NA	-1.63989	-1.22565	-1.99163	-1.18228
Microglia-specific age-repressed	ENSMUSG00000034394.14	Lif	chr11	4257557	4272514	HAVANA	+	protein_coding	NA	NA	NA	NA	NA	NA	NA	NA	NA	NA	NA	NA	NA	NA	NA	NA	NA	NA	-0.88301	NA	NA	NA
Microglia-specific age-repressed	ENSMUSG00000040714.14	Klc3	chr7	19394437	19404104	HAVANA	-	protein_coding	NA	NA	NA	NA	NA	NA	NA	NA	NA	NA	NA	NA	NA	NA	NA	NA	NA	NA	-1.82677	NA	-1.19902	-1.22042
Microglia-specific age-repressed	ENSMUSG00000021835.14	Bmp4	chr14	46383520	46390669	HAVANA	-	protein_coding	NA	NA	NA	NA	NA	NA	NA	NA	NA	NA	NA	NA	NA	NA	NA	NA	NA	NA	-1.54343	NA	NA	NA
Microglia-specific age-repressed	ENSMUSG00000036598.4	Ccdc113	chr8	95534085	95558890	HAVANA	+	protein_coding	NA	NA	NA	NA	NA	NA	NA	NA	NA	NA	NA	NA	NA	NA	NA	NA	NA	NA	-2.09385	NA	-1.41946	NA
Microglia-specific age-repressed	ENSMUSG00000063428.8	Ddo	chr10	40630011	40681847	HAVANA	+	protein_coding	NA	NA	NA	NA	NA	NA	NA	NA	NA	NA	NA	NA	NA	NA	NA	NA	NA	NA	-1.59591	NA	-1.74468	NA
Microglia-specific age-repressed	ENSMUSG00000055254.14	Ntrk2	chr13	58806596	59133970	ENSEMBL	+	protein_coding	NA	NA	NA	NA	NA	NA	NA	NA	NA	NA	NA	NA	NA	NA	NA	NA	NA	NA	-2.03368	NA	-2.41933	NA
Microglia-specific age-repressed	ENSMUSG00000022816.11	Fstl1	chr16	37776873	37836514	HAVANA	+	protein_coding	NA	NA	NA	NA	NA	NA	NA	NA	NA	NA	NA	NA	NA	NA	NA	NA	NA	NA	-1.63306	NA	-1.80807	NA
Microglia-specific age-repressed	ENSMUSG00000028937.14	Acot7	chr4	152178134	152271855	HAVANA	+	protein_coding	NA	NA	NA	NA	NA	NA	NA	NA	NA	NA	NA	NA	NA	NA	NA	NA	NA	NA	-0.861976	NA	-0.830974	NA
Microglia-specific age-repressed	ENSMUSG00000026888.14	Grb14	chr2	64912476	65024987	HAVANA	-	protein_coding	NA	NA	NA	NA	NA	NA	NA	NA	NA	NA	NA	NA	NA	NA	NA	NA	NA	NA	-1.80573	NA	-1.99059	-1.24986
Microglia-specific age-repressed	ENSMUSG00000027562.12	Car2	chr3	14886273	14900770	HAVANA	+	protein_coding	NA	NA	NA	NA	NA	NA	NA	NA	NA	NA	NA	NA	NA	NA	NA	NA	NA	NA	-1.56089	NA	-1.59831	NA
Microglia-specific age-repressed	ENSMUSG00000026904.17	Slc4a10	chr2	62046462	62326730	HAVANA	+	protein_coding	NA	NA	NA	NA	NA	NA	NA	NA	NA	NA	NA	NA	NA	NA	NA	NA	NA	NA	-1.6299	NA	-1.80302	NA
Microglia-specific age-repressed	ENSMUSG00000027797.15	Dclk1	chr3	55242364	55539068	HAVANA	+	protein_coding	NA	NA	NA	NA	NA	NA	NA	NA	NA	NA	NA	NA	NA	NA	NA	NA	NA	NA	-1.40767	-1.09865	-1.73932	-1.10954
Microglia-specific age-repressed	ENSMUSG00000007097.14	Atp1a2	chr1	172271709	172298064	HAVANA	-	protein_coding	NA	NA	NA	NA	NA	NA	NA	NA	NA	NA	NA	NA	NA	NA	NA	NA	NA	NA	-1.77077	NA	-2.09916	NA
Microglia-specific age-repressed	ENSMUSG00000026822.14	Lcn2	chr2	32384633	32388252	HAVANA	-	protein_coding	NA	NA	NA	NA	NA	NA	NA	NA	NA	NA	NA	NA	NA	NA	NA	NA	NA	NA	-2.27286	NA	-2.36038	NA
Microglia-specific age-repressed	ENSMUSG00000002900.16	Lamb1	chr12	31265234	31329644	HAVANA	+	protein_coding	NA	NA	NA	NA	NA	NA	NA	NA	NA	NA	NA	NA	NA	NA	NA	NA	NA	NA	-1.0945	-0.912657	-0.884602	NA
Microglia-specific age-repressed	ENSMUSG00000020937.14	Plcd3	chr11	103070304	103101658	HAVANA	-	protein_coding	NA	NA	NA	NA	NA	NA	NA	NA	NA	NA	NA	NA	NA	NA	NA	NA	NA	NA	-1.74444	NA	NA	NA
Microglia-specific age-repressed	ENSMUSG00000020844.6	Nxn	chr11	76257198	76399140	HAVANA	-	protein_coding	NA	NA	NA	NA	NA	NA	NA	NA	NA	NA	NA	NA	NA	NA	NA	NA	NA	NA	-1.61255	NA	-1.54943	-1.09267
Microglia-specific age-repressed	ENSMUSG00000049907.8	Rasl11b	chr5	74195286	74199481	HAVANA	+	protein_coding	NA	NA	NA	NA	NA	NA	NA	NA	NA	NA	NA	NA	NA	NA	NA	NA	NA	NA	-2.03651	NA	-1.80445	NA
Microglia-specific age-repressed	ENSMUSG00000032221.14	Mns1	chr9	72438011	72462025	HAVANA	+	protein_coding	NA	NA	NA	NA	NA	NA	NA	NA	NA	NA	NA	NA	NA	NA	NA	NA	NA	NA	-1.64024	-1.29684	-1.6251	NA
Microglia-specific age-repressed	ENSMUSG00000027546.15	Atp9a	chr2	168634438	168742409	HAVANA	-	protein_coding	NA	NA	NA	NA	NA	NA	NA	NA	NA	NA	NA	NA	NA	NA	NA	NA	NA	NA	-1.46431	-0.993866	-1.40882	-0.939442
Microglia-specific age-repressed	ENSMUSG00000027070.14	Lrp2	chr2	69424340	69586065	HAVANA	-	protein_coding	NA	NA	NA	NA	NA	NA	NA	NA	NA	NA	NA	NA	NA	NA	NA	NA	NA	NA	-1.29388	-1.05092	-1.68696	-1.11808
Microglia-specific age-repressed	ENSMUSG00000038871.5	Bpgm	chr6	34476207	34505613	HAVANA	+	protein_coding	NA	NA	NA	NA	NA	NA	NA	NA	NA	NA	NA	NA	NA	NA	NA	NA	NA	NA	-0.998775	NA	-1.15897	-1.03634
Microglia-specific age-repressed	ENSMUSG00000022197.15	Pdzd2	chr15	12359711	12739924	HAVANA	-	protein_coding	NA	NA	NA	NA	NA	NA	NA	NA	NA	NA	NA	NA	NA	NA	NA	NA	NA	NA	-2.01567	NA	-2.26365	NA
Microglia-specific age-repressed	ENSMUSG00000021876.14	Rnase4	chr14	51091077	51106151	ENSEMBL	+	protein_coding	NA	NA	NA	NA	NA	NA	NA	NA	NA	NA	NA	NA	NA	NA	NA	NA	NA	NA	-1.14833	-0.814647	-1.0731	-0.865927
Microglia-specific age-repressed	ENSMUSG00000045659.18	Plekha7	chr7	116123485	116308376	HAVANA	-	protein_coding	NA	NA	NA	NA	NA	NA	NA	NA	NA	NA	NA	NA	NA	NA	NA	NA	NA	NA	-1.76833	-1.24237	-1.98107	NA
Microglia-specific age-repressed	ENSMUSG00000026686.14	Lmx1a	chr1	167689237	167848741	HAVANA	+	protein_coding	NA	NA	NA	NA	NA	NA	NA	NA	NA	NA	NA	NA	NA	NA	NA	NA	NA	NA	-1.58609	NA	-1.64622	-1.14123
Microglia-specific age-repressed	ENSMUSG00000027470.9	Mylk2	chr2	152911352	152923068	HAVANA	+	protein_coding	NA	NA	NA	NA	NA	NA	NA	NA	NA	NA	NA	NA	NA	NA	NA	NA	NA	NA	-1.83929	NA	-1.71066	-1.46727
Microglia-specific age-repressed	ENSMUSG00000022010.19	Tsc22d1	chr14	76414961	76507765	HAVANA	+	protein_coding	NA	NA	NA	NA	NA	NA	NA	NA	NA	NA	NA	NA	NA	NA	NA	NA	NA	NA	-0.959114	NA	-1.03005	NA
Microglia-specific age-repressed	ENSMUSG00000039601.15	Rcan2	chr17	43801851	44039516	ENSEMBL	+	protein_coding	NA	NA	NA	NA	NA	NA	NA	NA	NA	NA	NA	NA	NA	NA	NA	NA	NA	NA	-1.69451	-1.15448	-1.86841	NA
Microglia-specific age-repressed	ENSMUSG00000020646.17	Mboat2	chr12	24830879	24964397	HAVANA	+	protein_coding	NA	NA	NA	NA	NA	NA	NA	NA	NA	NA	NA	NA	NA	NA	NA	NA	NA	NA	-1.40631	-1.01378	-1.22975	NA
Microglia-specific age-repressed	ENSMUSG00000003617.16	Cp	chr3	19957054	20009145	HAVANA	+	protein_coding	NA	NA	NA	NA	NA	NA	NA	NA	NA	NA	NA	NA	NA	NA	NA	NA	NA	NA	-2.04974	NA	-2.16735	NA
Microglia-specific age-repressed	ENSMUSG00000010080.15	Epn3	chr11	94489599	94499974	HAVANA	-	protein_coding	NA	NA	NA	NA	NA	NA	NA	NA	NA	NA	NA	NA	NA	NA	NA	NA	NA	NA	-2.04225	NA	-1.962	-1.56928
Microglia-specific age-repressed	ENSMUSG00000023972.9	Ptk7	chr17	46564451	46629504	ENSEMBL	-	protein_coding	NA	NA	NA	NA	NA	NA	NA	NA	NA	NA	NA	NA	NA	NA	NA	NA	NA	NA	-1.61024	NA	-1.21916	NA
Microglia-specific age-repressed	ENSMUSG00000029155.16	Spata18	chr5	73651379	73679512	HAVANA	+	protein_coding	NA	NA	NA	NA	NA	NA	NA	NA	NA	NA	NA	NA	NA	NA	NA	NA	NA	NA	-1.96915	-1.64418	-2.33467	-2.13358
Microglia-specific age-repressed	ENSMUSG00000005124.9	Wisp1	chr15	66891320	66923201	HAVANA	+	protein_coding	NA	NA	NA	NA	NA	NA	NA	NA	NA	NA	NA	NA	NA	NA	NA	NA	NA	NA	-1.34981	-1.32	-1.19992	-1.32935
Microglia-specific age-repressed	ENSMUSG00000020799.16	Tekt1	chr11	72344722	72362442	HAVANA	-	protein_coding	NA	NA	NA	NA	NA	NA	NA	NA	NA	NA	NA	NA	NA	NA	NA	NA	NA	NA	-2.23444	NA	-2.3589	NA
Microglia-specific age-repressed	ENSMUSG00000097183.2	Gm17501	chr3	145650312	145677580	HAVANA	+	lincRNA	NA	NA	NA	NA	NA	NA	NA	NA	NA	NA	NA	NA	NA	NA	NA	NA	NA	NA	-1.66456	-1.15263	-1.57754	NA
Microglia-specific age-repressed	ENSMUSG00000022505.8	Emp2	chr16	10281749	10313968	HAVANA	-	protein_coding	NA	NA	NA	NA	NA	1.35481	NA	NA	NA	NA	NA	NA	NA	NA	NA	NA	NA	NA	-1.0422	NA	-1.26481	NA
Microglia-specific age-repressed	ENSMUSG00000061859.16	Patj	chr4	98395785	98719603	HAVANA	+	protein_coding	NA	NA	NA	NA	NA	NA	NA	NA	NA	NA	NA	NA	NA	NA	NA	NA	NA	NA	-0.951965	NA	-0.986863	-1.1253
Microglia-specific age-repressed	ENSMUSG00000053702.16	Nebl	chr2	17343909	17731464	HAVANA	-	protein_coding	NA	NA	NA	NA	NA	NA	NA	NA	NA	NA	NA	NA	NA	NA	NA	NA	NA	NA	-1.38272	NA	-1.38822	NA
Microglia-specific age-repressed	ENSMUSG00000028364.15	Tnc	chr4	63959785	64047015	HAVANA	-	protein_coding	NA	NA	NA	NA	NA	NA	NA	NA	NA	NA	NA	NA	NA	NA	NA	NA	NA	NA	-1.75594	-1.56837	-1.8301	-1.43433
Microglia-specific age-repressed	ENSMUSG00000046694.6	Fam46b	chr4	133480132	133487938	HAVANA	+	protein_coding	NA	NA	NA	NA	NA	NA	NA	NA	NA	NA	NA	NA	NA	NA	NA	NA	NA	NA	-1.67482	NA	NA	NA
Microglia-specific age-repressed	ENSMUSG00000025420.13	Katnal2	chr18	76977148	77047308	HAVANA	-	protein_coding	NA	NA	NA	NA	NA	NA	NA	NA	NA	NA	NA	NA	NA	NA	NA	NA	NA	NA	-1.86056	-1.32982	-2.23478	NA
Microglia-specific age-repressed	ENSMUSG00000038677.13	Scube3	chr17	28142316	28174852	HAVANA	+	protein_coding	NA	NA	NA	NA	NA	NA	NA	NA	NA	NA	NA	NA	NA	NA	NA	NA	NA	NA	-1.31203	-0.975513	-1.24262	-1.03845
Microglia-specific age-repressed	ENSMUSG00000032062.2	2310030G06Rik	chr9	50739691	50746536	HAVANA	-	protein_coding	NA	NA	NA	NA	NA	NA	NA	NA	NA	NA	NA	NA	NA	NA	NA	NA	NA	NA	-1.51554	-1.1958	-1.89207	-1.67424
Microglia-specific age-repressed	ENSMUSG00000029769.16	Ccdc136	chr6	29396309	29426994	HAVANA	+	protein_coding	NA	NA	NA	NA	NA	NA	NA	NA	NA	NA	NA	NA	NA	NA	NA	NA	NA	NA	-1.74197	-1.20026	-1.40881	-1.1602
Microglia-specific age-repressed	ENSMUSG00000058914.12	C1qtnf3	chr15	10952332	10980150	HAVANA	+	protein_coding	NA	NA	NA	NA	NA	NA	NA	NA	NA	NA	NA	NA	NA	NA	NA	NA	NA	NA	-1.45472	-1.52828	-1.50391	-1.09441
Microglia-specific age-repressed	ENSMUSG00000047205.12	Dusp18	chr11	3895240	3901296	HAVANA	+	protein_coding	NA	NA	NA	NA	NA	NA	NA	NA	NA	NA	NA	NA	NA	NA	NA	NA	NA	NA	-0.818348	NA	-1.2501	NA
Microglia-specific age-repressed	ENSMUSG00000035578.15	Iqcg	chr16	33015385	33056218	HAVANA	-	protein_coding	NA	NA	NA	NA	NA	NA	NA	NA	NA	NA	NA	NA	NA	NA	NA	NA	NA	NA	-1.37358	NA	-1.61908	NA
Microglia-specific age-repressed	ENSMUSG00000054555.11	Adam12	chr7	133883199	134232146	HAVANA	-	protein_coding	NA	NA	NA	NA	NA	NA	NA	NA	NA	NA	NA	NA	NA	NA	NA	NA	NA	NA	-1.22796	-1.2233	-1.2424	-0.881496
Microglia-specific age-repressed	ENSMUSG00000035984.14	Nme5	chr18	34562634	34579115	HAVANA	-	protein_coding	NA	NA	NA	NA	NA	NA	NA	NA	NA	NA	NA	NA	NA	NA	NA	NA	NA	NA	-1.66819	NA	-1.35014	NA
Microglia-specific age-repressed	ENSMUSG00000038879.7	Nipal2	chr15	34572799	34678706	ENSEMBL	-	protein_coding	NA	NA	NA	NA	NA	NA	NA	NA	NA	NA	NA	NA	NA	NA	NA	NA	NA	NA	-1.93878	NA	-1.33527	NA
Microglia-specific age-repressed	ENSMUSG00000026674.9	Ddr2	chr1	169972307	170110762	HAVANA	-	protein_coding	NA	NA	NA	NA	NA	NA	NA	NA	NA	NA	NA	NA	NA	NA	NA	NA	NA	NA	-1.44854	-1.12549	-1.55145	-1.11256
Microglia-specific age-repressed	ENSMUSG00000044676.10	Zfp612	chr8	110079746	110092741	HAVANA	+	protein_coding	NA	NA	NA	NA	NA	NA	NA	NA	NA	NA	NA	NA	NA	NA	NA	NA	NA	NA	-1.2674	-1.39841	-1.54993	-1.09376
Microglia-specific age-repressed	ENSMUSG00000032085.5	Tagln	chr9	45929619	45936058	HAVANA	-	protein_coding	NA	NA	NA	NA	NA	NA	NA	NA	NA	NA	NA	NA	NA	NA	NA	NA	NA	NA	-1.28477	-1.2496	-1.30561	-1.15919
Microglia-specific age-repressed	ENSMUSG00000043613.8	Mmp3	chr9	7445822	7455975	HAVANA	+	protein_coding	NA	NA	NA	NA	NA	NA	NA	NA	NA	NA	NA	NA	NA	NA	NA	NA	NA	NA	-2.27369	NA	-2.29122	NA
Microglia-specific age-repressed	ENSMUSG00000027204.13	Fbn1	chr2	125300594	125507993	HAVANA	-	protein_coding	NA	NA	NA	NA	NA	NA	NA	NA	NA	NA	NA	NA	NA	NA	NA	NA	NA	NA	-1.16231	-1.02417	-1.39452	-0.897213
Microglia-specific age-repressed	ENSMUSG00000030306.14	Tmtc1	chr6	148232430	148444389	HAVANA	-	protein_coding	NA	NA	NA	NA	NA	NA	NA	NA	NA	NA	NA	NA	NA	NA	NA	NA	NA	NA	-1.70712	NA	-1.89846	-1.12815
Microglia-specific age-repressed	ENSMUSG00000012126.16	Ubxn11	chr4	134102570	134127593	HAVANA	+	protein_coding	NA	NA	NA	NA	NA	NA	NA	NA	NA	NA	NA	NA	NA	NA	NA	NA	NA	NA	-1.39991	NA	-1.35788	NA
Microglia-specific age-repressed	ENSMUSG00000020904.11	Cfap52	chr11	67924806	67965651	HAVANA	-	protein_coding	NA	NA	NA	NA	NA	NA	NA	NA	NA	NA	NA	NA	NA	NA	NA	NA	NA	NA	-1.38001	-1.07147	-1.71632	NA
Microglia-specific age-repressed	ENSMUSG00000033308.16	Dpyd	chr3	118562129	119432924	HAVANA	+	protein_coding	NA	NA	NA	NA	NA	NA	NA	NA	NA	NA	NA	NA	NA	NA	NA	NA	NA	NA	-1.45512	-1.19451	-2.10895	NA
Microglia-specific age-repressed	ENSMUSG00000050074.12	Spink8	chr9	109812280	109826633	HAVANA	+	protein_coding	NA	NA	NA	NA	NA	NA	NA	NA	NA	NA	NA	NA	NA	NA	NA	NA	NA	NA	-2.27382	NA	-2.35915	NA
Microglia-specific age-repressed	ENSMUSG00000061808.3	Ttr	chr18	20665250	20674324	ENSEMBL	+	protein_coding	NA	NA	NA	NA	NA	NA	NA	NA	NA	NA	NA	NA	NA	NA	NA	NA	NA	NA	-1.74061	NA	-1.70372	NA
Microglia-specific age-repressed	ENSMUSG00000020325.10	Fstl3	chr10	79777272	79782630	HAVANA	+	protein_coding	NA	NA	NA	NA	NA	NA	NA	NA	NA	NA	NA	NA	NA	NA	NA	NA	NA	NA	-0.900007	-1.20041	-1.03104	-0.88384
Microglia-specific age-repressed	ENSMUSG00000102252.5	Snrpn	chr7	59982495	60140219	HAVANA	-	protein_coding	NA	NA	NA	NA	NA	NA	NA	NA	NA	NA	NA	NA	NA	NA	NA	NA	NA	NA	-1.48182	NA	-1.35323	NA
Microglia-specific age-repressed	ENSMUSG00000020467.15	Efemp1	chr11	28853204	28926743	HAVANA	+	protein_coding	NA	NA	NA	NA	NA	NA	NA	NA	NA	NA	NA	NA	NA	NA	NA	NA	NA	NA	-2.6426	-2.32296	-5.81737	-3.25582
Microglia-specific age-repressed	ENSMUSG00000039851.11	4932438H23Rik	chr16	91053935	91095122	HAVANA	-	protein_coding	NA	NA	NA	NA	NA	NA	NA	NA	NA	NA	NA	NA	NA	NA	NA	NA	NA	NA	-1.40878	NA	-1.42026	NA
Microglia-specific age-repressed	ENSMUSG00000075590.2	Nrbp2	chr15	76085595	76090013	ENSEMBL	-	protein_coding	NA	NA	NA	NA	NA	NA	NA	NA	NA	NA	NA	NA	NA	NA	NA	NA	NA	NA	-1.72779	-1.27655	-1.80266	NA
Microglia-specific age-repressed	ENSMUSG00000030562.17	Nox4	chr7	87246096	87398710	HAVANA	+	protein_coding	NA	NA	NA	NA	NA	NA	NA	NA	NA	NA	NA	NA	NA	NA	NA	NA	NA	NA	-2.29776	-1.7323	-2.39352	-1.63808
Microglia-specific age-repressed	ENSMUSG00000037419.9	Endod1	chr9	14353990	14381507	HAVANA	-	protein_coding	NA	NA	NA	NA	NA	NA	NA	NA	NA	NA	NA	NA	NA	NA	NA	NA	NA	NA	-0.891363	NA	-1.09722	NA
Microglia-specific age-repressed	ENSMUSG00000030111.9	A2m	chr6	121635376	121679227	HAVANA	+	protein_coding	NA	NA	NA	NA	NA	NA	NA	NA	NA	NA	NA	NA	NA	NA	NA	NA	NA	NA	-2.19462	NA	-3.00954	NA
Microglia-specific age-repressed	ENSMUSG00000029371.7	Cxcl5	chr5	90759360	90761624	HAVANA	+	protein_coding	NA	NA	NA	2.9827	NA	3.14137	NA	NA	NA	NA	NA	NA	NA	NA	NA	NA	NA	NA	-1.66599	-1.23334	-1.79539	-1.19644
Microglia-specific age-repressed	ENSMUSG00000030849.18	Fgfr2	chr7	130162451	133123350	HAVANA	-	protein_coding	NA	NA	NA	NA	NA	NA	NA	NA	NA	NA	NA	NA	NA	NA	NA	NA	NA	NA	-1.63781	NA	-1.72903	NA
Microglia-specific age-repressed	ENSMUSG00000048450.10	Msx1	chr5	37820485	37824583	HAVANA	-	protein_coding	NA	NA	NA	NA	NA	NA	NA	NA	NA	NA	NA	NA	NA	NA	NA	NA	NA	NA	-1.84972	NA	-1.61933	NA
Microglia-specific age-repressed	ENSMUSG00000024033.9	Rsph1	chr17	31255019	31277356	ENSEMBL	-	protein_coding	NA	NA	NA	NA	NA	NA	NA	NA	NA	NA	NA	NA	NA	NA	NA	NA	NA	NA	-1.3425	-1.0479	-1.60612	-1.22569
Microglia-specific age-repressed	ENSMUSG00000024998.17	Plce1	chr19	38481109	38785030	HAVANA	+	protein_coding	NA	NA	NA	NA	NA	NA	NA	NA	NA	NA	NA	NA	NA	NA	NA	NA	NA	NA	-1.33605	NA	-1.66885	NA
Microglia-specific age-repressed	ENSMUSG00000090263.1	D730045A05Rik	chr18	74017907	74020088	HAVANA	+	lincRNA	NA	NA	NA	NA	NA	NA	NA	NA	NA	NA	NA	NA	NA	NA	NA	NA	NA	NA	-2.80699	NA	NA	NA
Microglia-specific age-repressed	ENSMUSG00000097451.10	Rian	chr12	109603940	109661716	HAVANA	+	processed_transcript	NA	NA	NA	NA	NA	NA	NA	NA	NA	NA	NA	NA	NA	NA	NA	NA	NA	NA	-1.66782	-1.84761	-1.40079	NA
Microglia-specific age-repressed	ENSMUSG00000036854.14	Hspb6	chr7	30552178	30555443	HAVANA	+	protein_coding	NA	NA	NA	NA	NA	NA	NA	NA	NA	NA	NA	NA	NA	NA	NA	NA	NA	NA	-1.54422	-1.27142	-1.76794	-1.27013
Microglia-specific age-repressed	ENSMUSG00000021253.7	Tgfb3	chr12	86056745	86079041	HAVANA	-	protein_coding	NA	NA	NA	NA	NA	NA	NA	NA	NA	NA	NA	NA	NA	NA	NA	NA	NA	NA	-1.71871	-1.38395	-1.48215	-1.41144
Microglia-specific age-repressed	ENSMUSG00000025203.5	Scd2	chr19	44293676	44306864	ENSEMBL	+	protein_coding	NA	NA	NA	NA	NA	NA	NA	NA	NA	NA	NA	NA	NA	NA	NA	NA	NA	NA	-1.32181	NA	-1.70379	-1.04821
Microglia-specific age-repressed	ENSMUSG00000042523.12	Dnal1	chr12	84114366	84147498	HAVANA	+	protein_coding	NA	NA	NA	NA	NA	NA	NA	NA	NA	NA	NA	NA	NA	NA	NA	NA	NA	NA	-0.92286	NA	-0.91447	NA
Microglia-specific age-repressed	ENSMUSG00000064080.12	Fbln2	chr6	91212455	91272540	HAVANA	+	protein_coding	NA	NA	NA	NA	NA	NA	NA	NA	NA	NA	NA	NA	NA	NA	NA	NA	NA	NA	-1.79069	-1.39291	-1.70116	-1.22008
Microglia-specific age-repressed	ENSMUSG00000021763.16	BC067074	chr13	113317084	113379711	HAVANA	+	protein_coding	NA	NA	NA	NA	NA	NA	NA	NA	NA	NA	NA	NA	NA	NA	NA	NA	NA	NA	-1.21358	-1.55695	-1.8197	-1.20095
Microglia-specific age-repressed	ENSMUSG00000055809.7	Dnaaf3	chr7	4522933	4532453	HAVANA	-	protein_coding	NA	NA	NA	NA	NA	NA	NA	NA	NA	NA	NA	NA	NA	NA	NA	NA	NA	NA	-1.27012	NA	-0.949177	NA
Microglia-specific age-repressed	ENSMUSG00000027419.9	Pcsk2	chr2	143546156	143816285	HAVANA	+	protein_coding	NA	NA	NA	NA	NA	NA	NA	NA	NA	NA	NA	NA	NA	NA	NA	NA	NA	NA	-1.73083	NA	-1.67695	NA
Microglia-specific age-repressed	ENSMUSG00000027894.14	Slc6a17	chr3	107467543	107518018	HAVANA	-	protein_coding	NA	NA	NA	NA	NA	NA	NA	NA	NA	NA	NA	NA	NA	NA	NA	NA	NA	NA	-1.10103	NA	-1.43398	NA
Microglia-specific age-repressed	ENSMUSG00000032014.6	Oaf	chr9	43221235	43239911	HAVANA	-	protein_coding	NA	NA	NA	NA	NA	NA	NA	NA	NA	NA	NA	NA	NA	NA	NA	NA	NA	NA	-1.06123	NA	NA	NA
Microglia-specific age-repressed	ENSMUSG00000023043.6	Krt18	chr15	102028216	102032026	ENSEMBL	+	protein_coding	NA	NA	NA	NA	NA	NA	NA	NA	NA	NA	NA	NA	NA	NA	NA	NA	NA	NA	-1.30072	-0.975176	-1.18864	-0.925346
Microglia-specific age-repressed	ENSMUSG00000100826.6	Snhg14	chr7	59307924	59975759	HAVANA	-	processed_transcript	NA	NA	NA	NA	NA	NA	NA	NA	NA	NA	NA	NA	NA	NA	NA	NA	NA	NA	-1.32507	NA	-1.00417	NA
Microglia-specific age-repressed	ENSMUSG00000044667.12	Plppr4	chr3	117319139	117360876	HAVANA	-	protein_coding	NA	NA	NA	NA	NA	NA	NA	NA	NA	NA	NA	NA	NA	NA	NA	NA	NA	NA	-2.37546	NA	-2.59922	NA
Microglia-specific age-repressed	ENSMUSG00000048706.3	Lurap1l	chr4	80910646	80955628	HAVANA	+	protein_coding	NA	NA	NA	NA	NA	NA	NA	NA	NA	NA	NA	NA	NA	NA	NA	NA	NA	NA	-1.23342	NA	-1.31576	NA
Microglia-specific age-repressed	ENSMUSG00000027016.17	Zfp385b	chr2	77410634	77819639	HAVANA	-	protein_coding	NA	NA	NA	NA	NA	NA	NA	NA	NA	NA	NA	NA	NA	NA	NA	NA	NA	NA	-1.51232	NA	-1.97963	NA
Microglia-specific age-repressed	ENSMUSG00000030587.5	2200002D01Rik	chr7	29246561	29248466	HAVANA	-	protein_coding	NA	NA	NA	NA	NA	NA	NA	NA	NA	NA	NA	NA	NA	NA	NA	NA	NA	NA	-1.34168	NA	-1.138	-1.33996
Microglia-specific age-repressed	ENSMUSG00000043969.4	Emx2	chr19	59458372	59465357	HAVANA	+	protein_coding	NA	NA	NA	NA	NA	NA	NA	NA	NA	NA	NA	NA	NA	NA	NA	NA	NA	NA	-1.98716	-3.44934	-2.87514	-2.24243
Microglia-specific age-repressed	ENSMUSG00000032009.8	Sesn3	chr9	14275067	14333101	HAVANA	+	protein_coding	NA	NA	NA	NA	NA	NA	NA	NA	NA	NA	NA	NA	NA	NA	NA	NA	NA	NA	-1.28664	NA	-1.17411	NA
Microglia-specific age-repressed	ENSMUSG00000016128.14	Stard13	chr5	151037510	151233836	HAVANA	-	protein_coding	NA	NA	NA	NA	NA	NA	NA	NA	NA	NA	NA	NA	NA	NA	NA	NA	NA	NA	-1.25132	NA	-1.19421	NA
Microglia-specific age-repressed	ENSMUSG00000051379.12	Flrt3	chr2	140650914	140671469	HAVANA	-	protein_coding	NA	NA	NA	NA	NA	NA	NA	NA	NA	NA	NA	NA	NA	NA	NA	NA	NA	NA	-1.02965	NA	NA	NA
Microglia-specific age-repressed	ENSMUSG00000033419.15	Snap91	chr9	86765923	86880654	HAVANA	-	protein_coding	NA	NA	NA	NA	NA	NA	NA	NA	NA	NA	NA	NA	NA	NA	NA	NA	NA	NA	-1.87594	-1.69928	-2.43178	-1.5124
Microglia-specific age-repressed	ENSMUSG00000022261.5	Sdc2	chr15	32920723	33034730	HAVANA	+	protein_coding	NA	NA	NA	NA	NA	NA	NA	NA	NA	NA	NA	NA	NA	NA	NA	NA	NA	NA	-1.73284	-1.25877	-1.76105	NA
Microglia-specific age-repressed	ENSMUSG00000090336.4	4932443I19Rik	chr8	13705889	13743414	HAVANA	+	protein_coding	NA	NA	NA	NA	NA	NA	NA	NA	NA	NA	NA	NA	NA	NA	NA	NA	NA	NA	-2.82288	NA	-2.13853	NA
Microglia-specific age-repressed	ENSMUSG00000026620.11	Mark1	chr1	184896789	184999570	HAVANA	-	protein_coding	NA	NA	NA	NA	NA	NA	NA	NA	NA	NA	NA	NA	NA	NA	NA	NA	NA	NA	-1.32058	NA	-1.73495	NA
Microglia-specific age-repressed	ENSMUSG00000027030.15	Stk39	chr2	68210445	68472268	HAVANA	-	protein_coding	NA	NA	NA	NA	NA	NA	NA	NA	NA	NA	NA	NA	NA	NA	NA	NA	NA	NA	-1.31477	-1.04914	-1.43745	NA
Microglia-specific age-repressed	ENSMUSG00000046598.14	Bdh1	chr16	31422280	31458901	HAVANA	+	protein_coding	NA	NA	NA	NA	NA	NA	NA	NA	NA	NA	NA	NA	NA	NA	NA	NA	NA	NA	-1.07126	NA	-1.37094	NA
Microglia-specific age-repressed	ENSMUSG00000022098.9	Bmp1	chr14	70474557	70520260	ENSEMBL	-	protein_coding	NA	NA	NA	NA	NA	NA	NA	NA	NA	NA	NA	NA	NA	NA	NA	NA	NA	NA	-1.96245	NA	-2.03525	NA
Microglia-specific age-repressed	ENSMUSG00000033053.3	1700028P14Rik	chr19	23558760	23652812	ENSEMBL	-	protein_coding	NA	NA	NA	NA	NA	NA	NA	NA	NA	NA	NA	NA	NA	NA	NA	NA	NA	NA	-4.1733	NA	-2.33683	NA
Microglia-specific age-repressed	ENSMUSG00000036814.13	Slc6a20a	chr9	123634770	123678885	HAVANA	-	protein_coding	NA	NA	NA	NA	NA	NA	NA	NA	NA	NA	NA	NA	NA	NA	NA	NA	NA	NA	-2.81829	NA	-4.32248	NA
Microglia-specific age-repressed	ENSMUSG00000021751.13	Acox2	chr14	8225511	8259353	HAVANA	-	protein_coding	NA	NA	NA	NA	NA	NA	NA	NA	NA	NA	NA	NA	NA	NA	NA	NA	NA	NA	-1.82571	NA	-2.16303	NA
Microglia-specific age-repressed	ENSMUSG00000014602.15	Kif1a	chr1	93015464	93101951	HAVANA	-	protein_coding	NA	NA	NA	NA	NA	NA	NA	NA	NA	NA	NA	NA	NA	NA	NA	NA	NA	NA	-1.17921	NA	-1.07903	NA
Microglia-specific age-repressed	ENSMUSG00000040147.14	Maob	chrX	16709282	16817366	HAVANA	-	protein_coding	NA	NA	NA	NA	NA	NA	NA	NA	NA	NA	NA	NA	NA	NA	NA	NA	NA	NA	-1.79494	NA	-2.20189	NA
Microglia-specific age-repressed	ENSMUSG00000041889.7	Shisa4	chr1	135371057	135375237	HAVANA	-	protein_coding	NA	NA	NA	NA	NA	NA	NA	NA	NA	NA	NA	NA	NA	NA	NA	NA	NA	NA	-1.3429	NA	-1.24726	-1.19678
Microglia-specific age-repressed	ENSMUSG00000038521.17	C1s1	chr6	124530345	124542359	HAVANA	-	protein_coding	NA	NA	NA	NA	NA	NA	NA	NA	NA	NA	NA	NA	NA	NA	NA	NA	NA	NA	-1.78207	NA	-2.32562	NA
Microglia-specific age-repressed	ENSMUSG00000027570.15	Col9a3	chr2	180597790	180622189	HAVANA	+	protein_coding	NA	NA	NA	NA	NA	NA	NA	NA	NA	NA	NA	NA	NA	NA	NA	NA	NA	NA	-1.49067	NA	-1.44071	NA
Microglia-specific age-repressed	ENSMUSG00000024302.16	Dtna	chr18	23415135	23659715	HAVANA	+	protein_coding	NA	NA	NA	NA	NA	NA	NA	NA	NA	NA	NA	NA	NA	NA	NA	NA	NA	NA	-1.36368	NA	-1.34955	NA
Microglia-specific age-repressed	ENSMUSG00000037784.14	Dzip1l	chr9	99629496	99669256	HAVANA	+	protein_coding	NA	NA	NA	NA	NA	NA	NA	NA	NA	NA	NA	NA	NA	NA	NA	NA	NA	NA	-1.41719	-1.25383	-1.3683	-1.50875
Microglia-specific age-repressed	ENSMUSG00000044550.11	Tceal3	chrX	136590842	136668378	HAVANA	+	protein_coding	NA	NA	NA	NA	NA	NA	NA	NA	NA	NA	NA	NA	NA	NA	NA	NA	NA	NA	-2.86595	NA	-1.73722	NA
Microglia-specific age-repressed	ENSMUSG00000031778.13	Cx3cl1	chr8	94772009	94782427	HAVANA	+	protein_coding	NA	NA	NA	NA	NA	NA	NA	NA	NA	NA	NA	NA	NA	NA	NA	NA	NA	NA	-1.13841	-0.923273	-1.12185	NA
Microglia-specific age-repressed	ENSMUSG00000031274.16	Col4a5	chrX	141475385	141689234	HAVANA	+	protein_coding	NA	NA	NA	NA	NA	NA	NA	NA	NA	NA	NA	NA	NA	NA	NA	NA	NA	NA	-1.4797	-1.41857	-1.59358	-1.31668
Microglia-specific age-repressed	ENSMUSG00000042429.8	Adora1	chr1	134199223	134235431	HAVANA	-	protein_coding	NA	NA	NA	NA	NA	NA	NA	NA	NA	NA	NA	NA	NA	NA	NA	NA	NA	NA	-1.22288	NA	-1.20305	NA
Microglia-specific age-repressed	ENSMUSG00000026443.3	Lrrn2	chr1	132880273	132940005	HAVANA	+	protein_coding	NA	NA	NA	NA	NA	NA	NA	NA	NA	NA	NA	NA	NA	NA	NA	NA	NA	NA	-1.92542	NA	-2.17349	NA
Microglia-specific age-repressed	ENSMUSG00000031558.15	Slit2	chr5	47983138	48307733	HAVANA	+	protein_coding	NA	NA	NA	NA	NA	NA	NA	NA	NA	NA	NA	NA	NA	NA	NA	NA	NA	NA	-1.70247	NA	-1.95726	NA
Microglia-specific age-repressed	ENSMUSG00000027460.7	Angpt4	chr2	151911210	151945337	HAVANA	+	protein_coding	NA	NA	NA	NA	NA	NA	NA	NA	NA	NA	NA	NA	NA	NA	NA	NA	NA	NA	-1.29029	-1.19904	-1.17786	NA
Microglia-specific age-repressed	ENSMUSG00000055980.2	Irs1	chr1	82233101	82291416	HAVANA	-	protein_coding	NA	NA	NA	NA	NA	NA	NA	NA	NA	NA	NA	NA	NA	NA	NA	NA	NA	NA	-1.3225	NA	-1.44409	-1.0265
Microglia-specific age-repressed	ENSMUSG00000002265.16	Peg3	chr7	6703892	6730431	HAVANA	-	protein_coding	NA	NA	NA	NA	NA	NA	NA	NA	NA	NA	NA	NA	NA	NA	NA	NA	NA	NA	-1.68354	NA	-1.75974	NA
Microglia-specific age-repressed	ENSMUSG00000025348.9	Itga7	chr10	128933818	128958282	HAVANA	+	protein_coding	NA	NA	NA	NA	NA	NA	NA	NA	NA	NA	NA	NA	NA	NA	NA	NA	NA	NA	-1.10163	NA	-1.1543	NA
Microglia-specific age-repressed	ENSMUSG00000038370.6	Pcp4l1	chr1	171173262	171196268	HAVANA	-	protein_coding	NA	NA	NA	NA	NA	NA	NA	NA	NA	NA	NA	NA	NA	NA	NA	NA	NA	NA	-1.52322	NA	-1.58554	NA
Microglia-specific age-repressed	ENSMUSG00000057880.12	Abat	chr16	8513429	8621568	HAVANA	+	protein_coding	NA	NA	NA	NA	NA	NA	NA	NA	NA	NA	NA	NA	NA	NA	NA	NA	NA	NA	-1.19988	-1.10064	-1.11179	-0.993666
Microglia-specific age-repressed	ENSMUSG00000056598.16	Drc3	chr11	60353329	60394341	HAVANA	+	protein_coding	NA	NA	NA	NA	NA	NA	NA	NA	NA	NA	NA	NA	NA	NA	NA	NA	NA	NA	-1.52171	NA	-2.10009	NA
Microglia-specific age-repressed	ENSMUSG00000022629.16	Kif21a	chr15	90933276	91049948	ENSEMBL	-	protein_coding	NA	NA	NA	NA	NA	NA	NA	NA	NA	NA	NA	NA	NA	NA	NA	NA	NA	NA	-1.4429	NA	-1.40217	NA
Microglia-specific age-repressed	ENSMUSG00000028655.11	Mfsd2a	chr4	122946850	122961188	HAVANA	-	protein_coding	NA	NA	NA	NA	NA	NA	NA	NA	NA	NA	NA	NA	NA	NA	NA	NA	NA	NA	-1.51274	NA	NA	NA
Microglia-specific age-repressed	ENSMUSG00000045287.6	Rtn4rl1	chr11	75193783	75267769	HAVANA	+	protein_coding	NA	NA	NA	NA	NA	NA	NA	NA	NA	NA	NA	NA	NA	NA	NA	NA	NA	NA	-1.00951	NA	-1.58055	-1.50382
Microglia-specific age-repressed	ENSMUSG00000033805.12	Ephx4	chr5	107402736	107430035	HAVANA	+	protein_coding	NA	NA	NA	NA	NA	NA	NA	NA	NA	NA	NA	NA	NA	NA	NA	NA	NA	NA	-2.06445	-2.01333	NA	NA
Microglia-specific age-repressed	ENSMUSG00000004558.14	Ndrg2	chr14	51905271	51913488	ENSEMBL	-	protein_coding	NA	NA	NA	NA	NA	NA	NA	NA	NA	NA	NA	NA	NA	NA	NA	NA	NA	NA	-1.16327	NA	-1.13445	NA
Microglia-specific age-repressed	ENSMUSG00000049176.14	Frmpd4	chrX	167471309	168577231	HAVANA	-	protein_coding	NA	NA	NA	NA	NA	NA	NA	NA	NA	NA	NA	NA	NA	NA	NA	NA	NA	NA	-1.64318	NA	-2.11202	NA
Microglia-specific age-repressed	ENSMUSG00000057286.6	St6galnac2	chr11	116675303	116694868	HAVANA	-	protein_coding	NA	NA	NA	NA	NA	NA	NA	NA	NA	NA	NA	NA	NA	NA	NA	NA	NA	NA	-1.48523	NA	-1.62242	NA
Microglia-specific age-repressed	ENSMUSG00000042745.9	Id1	chr2	152736251	152737410	HAVANA	+	protein_coding	NA	NA	NA	NA	NA	NA	NA	NA	NA	NA	NA	NA	NA	NA	NA	NA	NA	NA	-1.2295	NA	-1.46376	-0.917733
Microglia-specific age-repressed	ENSMUSG00000054889.9	Dsp	chr13	38151328	38198577	HAVANA	+	protein_coding	NA	NA	NA	NA	NA	NA	NA	NA	NA	NA	NA	NA	NA	NA	NA	NA	NA	NA	-1.44596	NA	-1.44009	NA
Microglia-specific age-repressed	ENSMUSG00000025885.18	Myo5b	chr18	74440936	74771493	HAVANA	+	protein_coding	NA	NA	NA	NA	NA	NA	NA	NA	NA	NA	NA	NA	NA	NA	NA	NA	NA	NA	-1.39492	NA	-1.56414	NA
Microglia-specific age-repressed	ENSMUSG00000023960.13	Enpp5	chr17	44078813	44086567	HAVANA	+	protein_coding	NA	NA	NA	NA	NA	NA	NA	NA	NA	NA	1.40821	2.25546	NA	NA	NA	NA	NA	NA	-1.32268	NA	-1.70083	NA
Microglia-specific age-repressed	ENSMUSG00000036466.17	Megf11	chr9	64385626	64709205	HAVANA	+	protein_coding	NA	NA	NA	NA	NA	NA	NA	NA	NA	NA	NA	NA	NA	NA	NA	NA	NA	NA	-1.61991	NA	-2.0402	NA
Microglia-specific age-repressed	ENSMUSG00000015709.9	Arnt2	chr7	84246278	84410176	HAVANA	-	protein_coding	NA	NA	NA	NA	NA	NA	NA	NA	NA	NA	NA	NA	NA	NA	NA	NA	NA	NA	-1.38531	NA	-1.62606	NA
Microglia-specific age-repressed	ENSMUSG00000026721.15	Rabgap1l	chr1	160219174	160793211	HAVANA	-	protein_coding	NA	NA	NA	NA	NA	NA	NA	NA	NA	-1.3469	NA	-1.706	NA	NA	NA	NA	NA	NA	-0.948518	-0.806642	-1.303	NA
Microglia-specific age-repressed	ENSMUSG00000100916.3	Lhb	chr7	45420820	45421897	HAVANA	+	protein_coding	NA	NA	NA	NA	NA	NA	NA	NA	NA	NA	NA	NA	NA	NA	NA	NA	NA	NA	-3.91725	NA	NA	NA
Microglia-specific age-repressed	ENSMUSG00000024211.15	Grm8	chr6	27275119	28135178	HAVANA	-	protein_coding	NA	NA	NA	NA	NA	NA	NA	NA	NA	NA	NA	NA	NA	NA	NA	NA	NA	NA	-1.7242	-1.31636	-2.18405	NA
Microglia-specific age-repressed	ENSMUSG00000032334.10	Loxl1	chr9	58287738	58313186	HAVANA	-	protein_coding	NA	NA	NA	NA	NA	NA	NA	NA	NA	NA	NA	NA	NA	NA	NA	NA	NA	NA	-1.65535	NA	-1.55781	-1.42673
Microglia-specific age-repressed	ENSMUSG00000024529.13	Lox	chr18	52516069	52529867	ENSEMBL	-	protein_coding	NA	NA	NA	NA	NA	NA	NA	NA	NA	NA	NA	NA	NA	NA	NA	NA	NA	NA	-1.38115	-1.10452	-1.07052	NA
Microglia-specific age-repressed	ENSMUSG00000018339.11	Gpx3	chr11	54902453	54910377	HAVANA	+	protein_coding	NA	NA	NA	NA	NA	NA	NA	NA	NA	NA	NA	NA	NA	NA	NA	NA	NA	NA	-2.92929	NA	-3.05779	NA
Microglia-specific age-repressed	ENSMUSG00000006651.8	Aplp1	chr7	30434982	30445535	HAVANA	-	protein_coding	NA	NA	NA	NA	NA	NA	NA	NA	NA	NA	NA	NA	NA	NA	NA	NA	NA	NA	-2.14076	NA	-1.64934	NA
Microglia-specific age-repressed	ENSMUSG00000027840.5	Wnt2b	chr3	104945272	104961921	HAVANA	-	protein_coding	NA	NA	NA	NA	NA	NA	NA	NA	NA	NA	NA	NA	NA	NA	NA	NA	NA	NA	-1.52192	NA	-1.62307	-1.21857
Microglia-specific age-repressed	ENSMUSG00000033900.13	Map9	chr3	82358044	82395268	HAVANA	+	protein_coding	NA	NA	NA	NA	NA	NA	NA	NA	NA	NA	NA	NA	NA	NA	NA	NA	NA	NA	-0.911328	NA	-1.21038	-0.922157
Microglia-specific age-repressed	ENSMUSG00000021057.15	Akap5	chr12	76324891	76334153	HAVANA	+	protein_coding	NA	NA	NA	NA	NA	NA	NA	NA	NA	NA	NA	NA	NA	NA	NA	NA	NA	NA	-1.79151	NA	-1.69425	NA
Microglia-specific age-repressed	ENSMUSG00000028671.16	Gale	chr4	135963727	135968178	HAVANA	+	protein_coding	NA	NA	NA	NA	NA	NA	NA	NA	NA	NA	NA	NA	NA	NA	NA	NA	NA	NA	-0.973953	NA	NA	NA
Microglia-specific age-repressed	ENSMUSG00000026166.14	Ccl20	chr1	83116766	83119167	HAVANA	+	protein_coding	NA	NA	NA	NA	NA	NA	NA	NA	NA	NA	NA	NA	NA	NA	NA	NA	NA	NA	-1.66282	NA	-1.84999	-1.21155
Microglia-specific age-repressed	ENSMUSG00000050248.11	Evc2	chr5	37338499	37425055	HAVANA	+	protein_coding	NA	NA	NA	NA	NA	NA	NA	NA	NA	NA	NA	NA	NA	NA	NA	NA	NA	NA	-1.1894	NA	-0.978274	-1.47474
Microglia-specific age-repressed	ENSMUSG00000032368.14	Zic1	chr9	91358058	91365810	HAVANA	-	protein_coding	NA	NA	NA	NA	NA	NA	NA	NA	NA	NA	NA	NA	NA	NA	NA	NA	NA	NA	-1.53591	NA	-1.56375	NA
Microglia-specific age-repressed	ENSMUSG00000050822.11	Slc29a4	chr5	142692512	142722490	HAVANA	+	protein_coding	NA	NA	NA	NA	NA	NA	NA	NA	NA	NA	NA	NA	NA	NA	NA	NA	NA	NA	-1.85562	NA	-2.17089	NA
Microglia-specific age-repressed	ENSMUSG00000028463.14	Car9	chr4	43506966	43513729	HAVANA	+	protein_coding	NA	NA	NA	NA	NA	NA	NA	NA	NA	NA	NA	NA	NA	NA	NA	NA	NA	NA	-1.46524	NA	-1.33117	NA
Microglia-specific age-repressed	ENSMUSG00000046352.7	Gjb2	chr14	57098600	57104702	HAVANA	-	protein_coding	NA	NA	NA	NA	NA	NA	NA	NA	NA	NA	NA	NA	NA	NA	NA	NA	NA	NA	-1.90256	NA	-2.14072	-1.43339
Microglia-specific age-repressed	ENSMUSG00000019124.10	Scrn1	chr6	54501173	54566489	HAVANA	-	protein_coding	NA	NA	NA	NA	NA	NA	NA	NA	NA	NA	NA	NA	NA	NA	NA	NA	NA	NA	-1.17014	NA	-2.2913	NA
Microglia-specific age-repressed	ENSMUSG00000026664.7	Phyh	chr2	4919019	4938730	HAVANA	+	protein_coding	NA	NA	NA	NA	NA	NA	NA	NA	NA	NA	NA	NA	NA	NA	NA	NA	NA	NA	-1.22146	NA	-1.53304	NA
Microglia-specific age-repressed	ENSMUSG00000025350.15	Rdh5	chr10	128913593	128922888	HAVANA	-	protein_coding	NA	NA	NA	NA	NA	NA	NA	NA	NA	NA	NA	NA	NA	NA	NA	NA	NA	NA	-1.07829	NA	-1.04987	NA
Microglia-specific age-repressed	ENSMUSG00000027896.15	Slc16a4	chr3	107291230	107312115	HAVANA	+	protein_coding	NA	NA	NA	NA	NA	NA	NA	NA	NA	NA	NA	NA	NA	NA	NA	NA	NA	NA	-2.18254	NA	-2.38133	NA
Microglia-specific age-repressed	ENSMUSG00000051000.17	Fam160a1	chr3	85660061	85817291	HAVANA	-	protein_coding	NA	NA	NA	NA	NA	NA	NA	NA	NA	NA	NA	NA	NA	NA	NA	NA	NA	NA	-1.61568	NA	-1.62483	NA
Microglia-specific age-repressed	ENSMUSG00000067653.12	Ankrd23	chr1	36530188	36536883	HAVANA	-	protein_coding	NA	NA	NA	NA	NA	NA	NA	NA	NA	-4.32804	NA	NA	NA	NA	NA	NA	NA	NA	-1.05542	NA	-1.10561	NA
Microglia-specific age-repressed	ENSMUSG00000032374.14	Plod2	chr9	92542223	92608428	HAVANA	+	protein_coding	NA	NA	NA	NA	NA	NA	NA	NA	NA	NA	NA	NA	NA	NA	NA	NA	NA	NA	-1.52415	NA	-1.7372	NA
Microglia-specific age-repressed	ENSMUSG00000028370.7	Pappa	chr4	65124174	65357509	HAVANA	+	protein_coding	NA	NA	NA	NA	NA	NA	NA	NA	NA	NA	NA	NA	NA	NA	NA	NA	NA	NA	-2.49202	-2.0624	-3.25284	NA
Microglia-specific age-repressed	ENSMUSG00000024304.14	Cdh2	chr18	16588877	16809246	HAVANA	-	protein_coding	NA	NA	NA	NA	NA	NA	NA	NA	NA	NA	NA	NA	NA	NA	NA	NA	NA	NA	-1.19564	-0.927751	-1.22975	NA
Microglia-specific age-repressed	ENSMUSG00000020782.18	Llgl2	chr11	115824049	115855780	HAVANA	+	protein_coding	NA	NA	NA	NA	NA	NA	NA	NA	NA	NA	NA	NA	NA	NA	NA	NA	NA	NA	-0.880421	NA	-1.18576	NA
Microglia-specific age-repressed	ENSMUSG00000045031.18	Cetn4	chr3	37307749	37312708	HAVANA	-	protein_coding	NA	NA	NA	NA	NA	NA	NA	NA	NA	NA	NA	NA	NA	NA	NA	NA	NA	NA	-1.36533	NA	-2.02307	NA
Microglia-specific age-repressed	ENSMUSG00000030616.15	Sytl2	chr7	90302252	90410719	HAVANA	+	protein_coding	NA	NA	NA	NA	NA	NA	NA	NA	NA	NA	NA	NA	NA	NA	NA	NA	NA	NA	-1.41138	NA	-1.61658	NA
Microglia-specific age-repressed	ENSMUSG00000029167.13	Ppargc1a	chr5	51454250	51567726	HAVANA	-	protein_coding	NA	NA	NA	NA	NA	NA	NA	NA	NA	NA	NA	NA	NA	NA	NA	NA	NA	NA	-1.68605	NA	-1.95454	-1.37983
Microglia-specific age-repressed	ENSMUSG00000027778.15	Ift80	chr3	68892499	69004570	HAVANA	-	protein_coding	NA	NA	NA	NA	NA	NA	NA	NA	NA	NA	NA	NA	NA	NA	NA	NA	NA	NA	-0.805754	NA	-1.08013	NA
Microglia-specific age-repressed	ENSMUSG00000031951.8	Tmem231	chr8	111912011	111933881	HAVANA	-	protein_coding	NA	NA	NA	NA	NA	NA	NA	NA	NA	NA	NA	NA	NA	NA	NA	NA	NA	NA	-0.84901	NA	-1.01955	-1.22193
Microglia-specific age-repressed	ENSMUSG00000023092.16	Fhl1	chrX	56731787	56793346	HAVANA	+	protein_coding	NA	NA	NA	NA	NA	NA	NA	NA	NA	NA	NA	NA	NA	NA	NA	NA	NA	NA	-1.33935	-1.95789	-1.41025	-1.52267
Microglia-specific age-repressed	ENSMUSG00000072663.12	Spef2	chr15	9578193	9748868	HAVANA	-	protein_coding	NA	NA	NA	NA	NA	NA	NA	NA	NA	NA	NA	NA	NA	NA	NA	NA	NA	NA	-1.33691	NA	-1.50682	NA
Microglia-specific age-repressed	ENSMUSG00000068876.14	Cgn	chr3	94760069	94786492	HAVANA	-	protein_coding	NA	NA	NA	NA	NA	NA	NA	NA	NA	NA	NA	NA	NA	NA	NA	NA	NA	NA	-1.07661	NA	NA	NA
Microglia-specific age-repressed	ENSMUSG00000031825.16	Crispld2	chr8	119992438	120052793	HAVANA	+	protein_coding	NA	NA	NA	NA	NA	NA	NA	NA	NA	NA	NA	NA	NA	NA	NA	NA	NA	NA	-1.87406	NA	-2.65639	-1.58332
Microglia-specific age-repressed	ENSMUSG00000037892.13	Pcdh18	chr3	49743296	49757325	HAVANA	-	protein_coding	NA	NA	NA	NA	NA	NA	NA	NA	NA	NA	NA	NA	NA	NA	NA	NA	NA	NA	-1.72048	NA	-1.40508	NA
Microglia-specific age-repressed	ENSMUSG00000061048.8	Cdh3	chr8	106510891	106557297	HAVANA	+	protein_coding	NA	NA	NA	NA	NA	NA	NA	NA	NA	NA	NA	NA	NA	NA	NA	NA	NA	NA	-1.21448	-0.97665	-1.23596	NA
Microglia-specific age-repressed	ENSMUSG00000027238.17	Frmd5	chr2	121545529	121807087	HAVANA	-	protein_coding	NA	NA	NA	NA	NA	NA	NA	NA	NA	NA	NA	NA	NA	NA	NA	NA	NA	NA	-1.99981	NA	NA	NA
Microglia-specific age-repressed	ENSMUSG00000037196.6	Pacrg	chr17	10403012	10840311	HAVANA	-	protein_coding	NA	NA	NA	NA	NA	NA	NA	NA	NA	NA	NA	NA	NA	NA	NA	NA	NA	NA	-1.14615	NA	-1.33052	-1.1522
Microglia-specific age-repressed	ENSMUSG00000000948.16	Gm38393	chr7	59974149	60005064	HAVANA	-	protein_coding	NA	NA	NA	NA	NA	NA	NA	NA	NA	NA	NA	NA	NA	NA	NA	NA	NA	NA	-1.22977	-1.3807	NA	NA
Microglia-specific age-repressed	ENSMUSG00000017314.12	Mpp2	chr11	102057015	102088515	HAVANA	-	protein_coding	NA	NA	NA	NA	NA	NA	NA	NA	NA	NA	NA	NA	NA	NA	NA	NA	NA	NA	-1.56243	NA	-1.10324	NA
Microglia-specific age-repressed	ENSMUSG00000035403.10	Crb2	chr2	37776249	37799103	HAVANA	+	protein_coding	NA	NA	NA	NA	NA	NA	NA	NA	NA	NA	NA	NA	NA	NA	NA	NA	NA	NA	-1.56079	NA	-1.88623	NA
Microglia-specific age-repressed	ENSMUSG00000022687.12	Boc	chr16	44485049	44558897	HAVANA	-	protein_coding	NA	NA	NA	NA	NA	NA	NA	NA	NA	NA	NA	NA	NA	NA	NA	NA	NA	NA	-1.37302	NA	-1.75569	NA
Microglia-specific age-repressed	ENSMUSG00000021986.7	Amer2	chr14	60378286	60381003	ENSEMBL	+	protein_coding	NA	NA	NA	NA	NA	NA	NA	NA	NA	NA	NA	NA	NA	NA	NA	NA	NA	NA	-1.40703	NA	-1.25643	NA
Microglia-specific age-repressed	ENSMUSG00000054863.8	Fam19a5	chr15	87625230	87759336	ENSEMBL	+	protein_coding	NA	NA	NA	NA	NA	NA	NA	NA	NA	NA	NA	NA	NA	NA	NA	NA	NA	NA	-1.69431	NA	-1.42927	NA
Microglia-specific age-repressed	ENSMUSG00000021136.13	Smoc1	chr12	81026808	81186414	HAVANA	+	protein_coding	NA	NA	NA	NA	NA	NA	NA	NA	NA	NA	NA	NA	NA	NA	NA	NA	NA	NA	-1.48843	NA	-2.43481	NA
Microglia-specific age-repressed	ENSMUSG00000042750.7	Bex2	chrX	136066564	136068236	HAVANA	-	protein_coding	NA	NA	NA	NA	NA	NA	NA	NA	NA	NA	NA	NA	NA	NA	NA	NA	NA	NA	-2.44482	NA	NA	NA
Microglia-specific age-repressed	ENSMUSG00000025352.6	Gdf11	chr10	128882295	128891718	HAVANA	-	protein_coding	NA	NA	NA	NA	NA	NA	NA	NA	NA	NA	NA	NA	NA	NA	NA	NA	NA	NA	-1.86167	NA	-1.48493	NA
Microglia-specific age-repressed	ENSMUSG00000007888.15	Crlf1	chr8	70493158	70504081	HAVANA	+	protein_coding	NA	NA	NA	NA	NA	NA	NA	NA	NA	NA	NA	NA	NA	NA	NA	NA	NA	NA	-1.17591	-1.13586	-1.19475	-1.03218
Microglia-specific age-repressed	ENSMUSG00000068428.6	Gmnc	chr16	26957236	26989974	ENSEMBL	-	protein_coding	NA	NA	NA	NA	NA	NA	NA	NA	NA	NA	NA	NA	NA	NA	NA	NA	NA	NA	-1.17416	NA	NA	NA
Microglia-specific age-repressed	ENSMUSG00000040189.17	Ccdc114	chr7	45924072	45948963	HAVANA	+	protein_coding	NA	NA	NA	NA	NA	NA	NA	NA	NA	NA	NA	NA	NA	NA	NA	NA	NA	NA	-1.28879	NA	-1.45624	NA
Microglia-specific age-repressed	ENSMUSG00000022995.16	Enah	chr1	181896384	182019990	HAVANA	-	protein_coding	NA	NA	NA	NA	NA	NA	NA	NA	NA	NA	NA	NA	NA	NA	NA	NA	NA	NA	-1.13886	-0.991048	-1.42856	-0.909422
Microglia-specific age-repressed	ENSMUSG00000003452.15	Bicd1	chr6	149408886	149563329	HAVANA	+	protein_coding	NA	NA	NA	NA	NA	NA	NA	NA	NA	NA	NA	NA	NA	NA	NA	NA	NA	NA	-1.23176	NA	-1.21173	NA
Microglia-specific age-repressed	ENSMUSG00000050199.13	Lgr4	chr2	109917647	110014257	HAVANA	+	protein_coding	NA	NA	NA	NA	NA	NA	NA	NA	NA	NA	NA	NA	NA	NA	NA	NA	NA	NA	-1.0964	NA	-1.04336	NA
Microglia-specific age-repressed	ENSMUSG00000039405.7	Prss23	chr7	89507783	89527187	HAVANA	-	protein_coding	NA	NA	NA	NA	NA	NA	NA	NA	NA	NA	NA	NA	NA	NA	NA	NA	NA	NA	-0.98839	NA	-1.12769	-0.840682
Microglia-specific age-repressed	ENSMUSG00000007783.10	Cpt1c	chr7	44959372	44974851	HAVANA	-	protein_coding	NA	NA	NA	NA	NA	NA	NA	NA	NA	NA	NA	NA	NA	NA	NA	NA	NA	NA	-1.40204	NA	-1.42288	NA
Microglia-specific age-repressed	ENSMUSG00000067377.12	Tspan6	chrX	133891068	133898429	HAVANA	-	protein_coding	NA	NA	NA	NA	NA	NA	NA	NA	NA	NA	NA	NA	NA	NA	NA	NA	NA	NA	-1.07989	-1.01761	-1.56053	-0.967251
Microglia-specific age-repressed	ENSMUSG00000027805.16	Pfn2	chr3	57841895	57848079	HAVANA	-	protein_coding	NA	NA	NA	NA	NA	NA	NA	NA	NA	NA	NA	NA	NA	NA	NA	NA	NA	NA	-1.29212	NA	-1.12858	NA
Microglia-specific age-repressed	ENSMUSG00000032064.17	Dixdc1	chr9	50662752	50739517	HAVANA	-	protein_coding	NA	NA	NA	NA	NA	NA	NA	NA	NA	NA	NA	NA	NA	NA	NA	NA	NA	NA	-1.33776	NA	-1.3339	NA
Microglia-specific age-repressed	ENSMUSG00000035126.19	Wdr78	chr4	103038065	103114555	HAVANA	-	protein_coding	NA	NA	NA	NA	NA	NA	NA	NA	NA	NA	NA	NA	NA	NA	NA	NA	NA	NA	-1.1538	NA	-1.41789	NA
Microglia-specific age-repressed	ENSMUSG00000034573.14	Ptpn13	chr5	103425192	103598303	HAVANA	+	protein_coding	NA	NA	NA	NA	NA	NA	NA	NA	NA	NA	NA	NA	NA	NA	NA	NA	NA	NA	-1.50714	NA	-1.12657	NA
Microglia-specific age-repressed	ENSMUSG00000021186.9	Fbln5	chr12	101746565	101819055	HAVANA	-	protein_coding	NA	NA	NA	NA	NA	NA	NA	NA	NA	NA	NA	NA	NA	NA	NA	NA	NA	NA	-1.16753	NA	-1.74653	NA
Microglia-specific age-repressed	ENSMUSG00000028399.18	Ptprd	chr4	75941238	78211961	HAVANA	-	protein_coding	NA	NA	NA	NA	NA	NA	NA	NA	NA	NA	NA	NA	NA	NA	NA	NA	NA	NA	-1.37663	NA	-1.5574	NA
Microglia-specific age-repressed	ENSMUSG00000066643.12	Wdr35	chr12	8973892	9028847	HAVANA	+	protein_coding	NA	NA	NA	NA	NA	NA	NA	NA	NA	NA	NA	NA	NA	NA	NA	NA	NA	NA	-0.890603	NA	-1.26511	NA
Microglia-specific age-repressed	ENSMUSG00000033420.12	Antxr1	chr6	87133853	87335821	HAVANA	-	protein_coding	NA	NA	NA	NA	NA	NA	NA	NA	NA	NA	NA	NA	NA	NA	NA	NA	NA	NA	-1.29961	-1.23069	-1.84383	NA
Microglia-specific age-repressed	ENSMUSG00000068323.12	Slc4a5	chr6	83219828	83304945	HAVANA	+	protein_coding	NA	NA	NA	NA	NA	NA	NA	NA	NA	NA	NA	NA	NA	NA	NA	NA	NA	NA	-0.905299	NA	-1.0143	NA
Microglia-specific age-repressed	ENSMUSG00000037490.5	Slc2a12	chr10	22645011	22704285	HAVANA	+	protein_coding	NA	NA	NA	NA	NA	NA	NA	NA	NA	NA	NA	NA	NA	NA	NA	NA	NA	NA	-1.35612	-1.18252	-1.67708	-1.24365
Microglia-specific age-repressed	ENSMUSG00000028601.18	Echdc2	chr4	108165437	108179308	HAVANA	+	protein_coding	NA	NA	NA	NA	NA	NA	NA	NA	NA	NA	NA	NA	NA	NA	NA	NA	NA	NA	-1.22899	NA	NA	NA
Microglia-specific age-repressed	ENSMUSG00000029120.10	Ppp2r2c	chr5	36868513	36955078	HAVANA	+	protein_coding	NA	NA	NA	NA	NA	NA	NA	NA	NA	NA	NA	NA	NA	NA	NA	NA	NA	NA	-1.3712	NA	-1.90262	NA
Microglia-specific age-repressed	ENSMUSG00000026679.3	Enkur	chr2	21180731	21205365	HAVANA	-	protein_coding	NA	NA	NA	NA	NA	NA	NA	NA	NA	NA	NA	NA	NA	NA	NA	NA	NA	NA	-1.39546	NA	-1.05706	NA
Microglia-specific age-repressed	ENSMUSG00000048142.9	Nat8l	chr5	33995984	34005916	HAVANA	+	protein_coding	NA	NA	NA	NA	NA	NA	NA	NA	NA	2.67409	NA	NA	NA	NA	NA	NA	NA	NA	-1.52387	NA	-1.73381	NA
Microglia-specific age-repressed	ENSMUSG00000010830.7	Kdelr3	chr15	79516408	79527739	ENSEMBL	+	protein_coding	NA	NA	NA	NA	NA	NA	NA	NA	NA	NA	NA	NA	NA	NA	NA	NA	NA	NA	-1.36859	NA	-1.34853	NA
Microglia-specific age-repressed	ENSMUSG00000032348.6	Gsta4	chr9	78182774	78209349	HAVANA	+	protein_coding	NA	NA	NA	NA	NA	NA	NA	NA	NA	NA	NA	NA	NA	NA	NA	NA	NA	NA	-1.37736	NA	-1.45659	NA
Microglia-specific age-repressed	ENSMUSG00000023966.8	Rsph9	chr17	46122035	46144216	HAVANA	-	protein_coding	NA	NA	NA	NA	NA	NA	NA	NA	NA	NA	NA	NA	NA	NA	NA	NA	NA	NA	-1.16277	NA	-1.29525	NA
Microglia-specific age-repressed	ENSMUSG00000037738.11	Nek5	chr8	22073616	22125053	HAVANA	-	protein_coding	NA	NA	NA	NA	NA	NA	NA	NA	NA	NA	NA	NA	NA	NA	NA	NA	NA	NA	-1.13034	NA	-1.37368	NA
Microglia-specific age-repressed	ENSMUSG00000057614.6	Gnai1	chr5	18265135	18360355	HAVANA	-	protein_coding	NA	NA	NA	NA	NA	NA	NA	NA	NA	NA	NA	NA	NA	NA	-1.82726	NA	NA	NA	-1.46359	NA	-1.64806	NA
Microglia-specific age-repressed	ENSMUSG00000026576.12	Atp1b1	chr1	164437109	164458355	HAVANA	-	protein_coding	NA	NA	NA	NA	NA	NA	NA	NA	NA	NA	NA	NA	NA	NA	NA	NA	NA	NA	-1.19906	NA	-1.38633	NA
Microglia-specific age-repressed	ENSMUSG00000074170.5	Plekhf1	chr7	38216972	38228016	HAVANA	-	protein_coding	NA	NA	NA	NA	NA	NA	NA	NA	NA	NA	NA	NA	NA	NA	NA	NA	NA	NA	-1.30658	NA	-1.02774	NA
Microglia-specific age-repressed	ENSMUSG00000033722.9	BC034090	chr1	155212471	155244444	HAVANA	-	protein_coding	NA	NA	NA	NA	NA	NA	NA	NA	NA	NA	NA	NA	NA	NA	NA	NA	NA	NA	-1.43113	NA	-1.24724	NA
Microglia-specific age-repressed	ENSMUSG00000020562.7	Efcab10	chr12	33394854	33401267	HAVANA	+	protein_coding	NA	NA	NA	NA	NA	NA	NA	NA	NA	NA	NA	NA	NA	NA	NA	NA	NA	NA	-2.43714	NA	NA	NA
Microglia-specific age-repressed	ENSMUSG00000016526.8	Dyrk3	chr1	131127455	131138340	HAVANA	-	protein_coding	NA	NA	NA	NA	NA	NA	NA	NA	NA	NA	NA	NA	NA	NA	NA	NA	NA	NA	-0.891059	NA	-0.865644	NA
Microglia-specific age-repressed	ENSMUSG00000001039.12	B9d1	chr11	61505144	61512931	HAVANA	+	protein_coding	NA	NA	NA	NA	NA	NA	NA	NA	NA	NA	NA	NA	NA	NA	NA	NA	NA	NA	-0.965255	NA	-1.20744	NA
Microglia-specific age-repressed	ENSMUSG00000022512.2	Cldn1	chr16	26356642	26371841	HAVANA	-	protein_coding	NA	NA	NA	NA	NA	NA	NA	NA	NA	NA	NA	NA	NA	NA	NA	NA	NA	NA	-1.15042	NA	-1.3371	NA
Microglia-specific age-repressed	ENSMUSG00000022040.7	Ephx2	chr14	66084377	66124500	ENSEMBL	-	protein_coding	NA	NA	NA	NA	NA	NA	NA	NA	NA	NA	NA	NA	NA	NA	NA	NA	NA	NA	-1.17518	NA	-2.64533	NA
Microglia-specific age-repressed	ENSMUSG00000024376.6	Epb41l4a	chr18	33796327	34007206	ENSEMBL	-	protein_coding	NA	NA	NA	NA	NA	NA	NA	NA	NA	NA	NA	NA	NA	NA	NA	NA	NA	NA	-1.17217	-1.22115	-1.01705	-1.18677
Microglia-specific age-repressed	ENSMUSG00000035357.16	Pdzrn3	chr6	101149609	101377897	HAVANA	-	protein_coding	NA	NA	NA	NA	NA	NA	NA	NA	NA	NA	NA	NA	NA	NA	NA	NA	NA	NA	-1.43096	NA	-1.55749	NA
Microglia-specific age-repressed	ENSMUSG00000069170.13	Adgrv1	chr13	81095068	81633154	HAVANA	-	protein_coding	NA	NA	NA	NA	NA	NA	NA	NA	NA	NA	NA	NA	NA	NA	NA	NA	NA	NA	-1.37855	NA	-1.47512	NA
Microglia-specific age-repressed	ENSMUSG00000033060.15	Lmo7	chr14	101729957	101934710	HAVANA	+	protein_coding	NA	NA	NA	NA	NA	NA	NA	NA	NA	NA	NA	NA	NA	NA	NA	NA	NA	NA	-0.879763	NA	NA	NA
Microglia-specific age-repressed	ENSMUSG00000071604.4	Fam189a2	chr19	23972751	24031019	ENSEMBL	-	protein_coding	NA	NA	NA	NA	NA	NA	NA	NA	NA	NA	NA	NA	NA	NA	NA	NA	NA	NA	-1.04014	NA	-1.59137	-1.2059
Microglia-specific age-repressed	ENSMUSG00000032487.8	Ptgs2	chr1	150100031	150108227	HAVANA	+	protein_coding	NA	NA	NA	NA	NA	NA	NA	NA	NA	NA	NA	NA	NA	NA	NA	NA	NA	NA	-1.29036	-1.08807	NA	NA
Microglia-specific age-repressed	ENSMUSG00000038552.14	Fndc4	chr5	31292242	31296080	HAVANA	-	protein_coding	NA	NA	NA	NA	NA	NA	NA	NA	NA	NA	NA	NA	NA	NA	NA	NA	NA	NA	-1.93112	NA	-1.86929	NA
Microglia-specific age-repressed	ENSMUSG00000052221.8	Ppp1r36	chr12	76417538	76439492	HAVANA	+	protein_coding	NA	NA	NA	NA	NA	NA	NA	NA	NA	NA	NA	NA	NA	NA	NA	NA	NA	NA	-2.73119	NA	NA	NA
Microglia-specific age-repressed	ENSMUSG00000044716.12	Dok7	chr5	35056766	35087839	HAVANA	+	protein_coding	NA	NA	NA	NA	NA	NA	NA	NA	NA	NA	NA	NA	NA	NA	NA	NA	NA	NA	-1.2416	NA	NA	-1.22992
Microglia-specific age-repressed	ENSMUSG00000041986.16	Elmod1	chr9	53911457	53975301	HAVANA	-	protein_coding	NA	NA	NA	NA	NA	NA	NA	NA	NA	NA	NA	NA	NA	NA	NA	NA	NA	NA	-1.84336	NA	-2.19558	NA
Microglia-specific age-repressed	ENSMUSG00000039865.8	Slc44a3	chr3	121459528	121532404	HAVANA	-	protein_coding	NA	NA	NA	NA	NA	NA	NA	NA	NA	NA	NA	NA	NA	NA	NA	NA	NA	NA	-2.21918	NA	-2.40456	NA
Microglia-specific age-repressed	ENSMUSG00000026837.15	Col5a1	chr2	27886425	28039514	HAVANA	+	protein_coding	NA	NA	NA	NA	NA	NA	NA	NA	NA	NA	NA	NA	NA	NA	NA	NA	NA	NA	-1.95235	NA	-2.25758	NA
Microglia-specific age-repressed	ENSMUSG00000042757.16	Tmem108	chr9	103482947	103761837	HAVANA	-	protein_coding	NA	NA	NA	NA	NA	NA	NA	NA	NA	NA	NA	NA	NA	NA	NA	NA	NA	NA	-1.41204	NA	-1.52475	NA
Microglia-specific age-repressed	ENSMUSG00000023236.7	Scg5	chr2	113776362	113829121	HAVANA	-	protein_coding	NA	NA	NA	NA	NA	NA	NA	NA	NA	NA	NA	NA	NA	NA	NA	NA	NA	NA	-2.21911	NA	-1.81595	NA
Microglia-specific age-repressed	ENSMUSG00000063727.3	Tnfrsf11b	chr15	54250619	54278484	ENSEMBL	-	protein_coding	NA	NA	NA	NA	NA	NA	NA	NA	NA	NA	NA	NA	NA	NA	NA	NA	NA	NA	-1.01552	-1.23429	-1.48917	-1.07582
Microglia-specific age-repressed	ENSMUSG00000043687.15	1190005I06Rik	chr8	120608602	120647632	HAVANA	-	protein_coding	NA	NA	NA	NA	NA	NA	NA	NA	NA	NA	NA	NA	NA	NA	NA	NA	NA	NA	-1.04899	NA	NA	NA
Microglia-specific age-repressed	ENSMUSG00000008136.14	Fhl2	chr1	43123074	43196984	HAVANA	-	protein_coding	NA	NA	NA	NA	NA	NA	NA	NA	NA	NA	NA	NA	NA	NA	NA	NA	NA	NA	-1.29505	NA	NA	NA
Microglia-specific age-repressed	ENSMUSG00000019779.15	Frk	chr10	34483399	34611278	HAVANA	+	protein_coding	NA	NA	NA	NA	NA	NA	NA	NA	NA	NA	NA	NA	NA	NA	NA	NA	NA	NA	-0.820999	NA	NA	NA
Microglia-specific age-repressed	ENSMUSG00000035104.14	Eva1a	chr6	82041043	82093099	HAVANA	+	protein_coding	NA	NA	NA	NA	NA	NA	NA	NA	NA	NA	NA	NA	NA	NA	NA	NA	NA	NA	-0.94867	NA	NA	NA
Microglia-specific age-repressed	ENSMUSG00000031791.8	Tmem38a	chr8	72572055	72587282	HAVANA	+	protein_coding	NA	NA	NA	NA	NA	NA	NA	NA	NA	NA	NA	NA	NA	NA	NA	NA	NA	NA	-0.889021	NA	-1.21013	-0.856149
Microglia-specific age-repressed	ENSMUSG00000003534.17	Ddr1	chr17	35681567	35704621	HAVANA	-	protein_coding	NA	NA	NA	NA	NA	NA	NA	NA	NA	NA	NA	NA	NA	NA	NA	NA	NA	NA	-1.32058	NA	-1.29854	NA
Microglia-specific age-repressed	ENSMUSG00000015134.15	Aldh1a3	chr7	66390890	66427517	HAVANA	-	protein_coding	NA	NA	NA	NA	NA	NA	NA	NA	NA	NA	NA	NA	NA	NA	NA	NA	NA	NA	-1.44511	NA	NA	NA
Microglia-specific age-repressed	ENSMUSG00000030257.16	Srgap3	chr6	112717971	112947266	HAVANA	-	protein_coding	NA	NA	NA	NA	NA	NA	NA	NA	NA	NA	NA	NA	NA	NA	NA	NA	NA	NA	-1.18806	NA	-1.32924	NA
Microglia-specific age-repressed	ENSMUSG00000020310.9	Madcam1	chr10	79664559	79668537	HAVANA	+	protein_coding	NA	NA	NA	NA	NA	NA	NA	NA	NA	NA	NA	NA	NA	NA	NA	NA	NA	NA	-1.41126	NA	-1.78848	NA
Microglia-specific age-repressed	ENSMUSG00000028909.17	Ptpru	chr4	131768457	131838288	HAVANA	-	protein_coding	NA	NA	NA	NA	NA	NA	NA	NA	NA	NA	NA	NA	NA	NA	NA	NA	NA	NA	-1.22733	NA	-1.61191	NA
Microglia-specific age-repressed	ENSMUSG00000061540.3	Orm2	chr4	63362449	63365878	HAVANA	+	protein_coding	NA	NA	NA	NA	NA	NA	NA	NA	NA	NA	NA	NA	NA	NA	NA	NA	NA	NA	-2.95673	NA	-3.19868	NA
Microglia-specific age-repressed	ENSMUSG00000079465.8	Col4a3	chr1	82586921	82722059	HAVANA	+	protein_coding	NA	NA	NA	NA	NA	NA	NA	NA	NA	NA	NA	NA	NA	NA	NA	NA	NA	NA	-1.10664	-1.33627	-1.12379	-1.15314
Microglia-specific age-repressed	ENSMUSG00000006931.15	P3h4	chr11	100408456	100414836	HAVANA	-	protein_coding	NA	NA	NA	NA	NA	NA	NA	NA	NA	NA	NA	NA	NA	NA	NA	NA	NA	NA	-1.04564	-1.03763	-0.874792	-1.00122
Microglia-specific age-repressed	ENSMUSG00000022840.8	Adcy5	chr16	35154877	35305737	ENSEMBL	+	protein_coding	NA	NA	NA	NA	NA	NA	NA	NA	NA	NA	NA	NA	NA	NA	NA	NA	NA	NA	-1.56267	-1.39206	-1.36338	NA
Microglia-specific age-repressed	ENSMUSG00000020900.15	Myh10	chr11	68691559	68816632	HAVANA	+	protein_coding	NA	NA	NA	NA	NA	NA	NA	NA	NA	NA	NA	NA	NA	NA	NA	NA	NA	NA	-1.19286	NA	-1.45246	-1.09023
Microglia-specific age-repressed	ENSMUSG00000069806.5	Cacng7	chr7	3332955	3368221	HAVANA	+	protein_coding	NA	NA	NA	NA	NA	NA	NA	NA	NA	NA	NA	NA	NA	NA	NA	NA	NA	NA	-1.74567	NA	-1.6217	NA
Microglia-specific age-repressed	ENSMUSG00000032262.13	Elovl4	chr9	83778692	83806277	HAVANA	-	protein_coding	NA	NA	NA	NA	NA	NA	NA	NA	NA	NA	NA	NA	NA	NA	NA	NA	NA	NA	-1.51766	-1.58588	NA	NA
Microglia-specific age-repressed	ENSMUSG00000029843.4	Slc13a4	chr6	35267957	35308131	HAVANA	-	protein_coding	NA	NA	NA	NA	NA	NA	NA	NA	NA	NA	NA	NA	NA	NA	NA	NA	NA	NA	-1.72853	NA	-2.74312	NA
Microglia-specific age-repressed	ENSMUSG00000004267.16	Eno2	chr6	124760053	124769673	HAVANA	-	protein_coding	NA	NA	NA	NA	NA	NA	NA	NA	NA	NA	NA	NA	NA	NA	NA	NA	NA	NA	-0.826793	NA	-0.836781	NA
Microglia-specific age-repressed	ENSMUSG00000019467.15	Arhgef25	chr10	127182525	127190083	HAVANA	-	protein_coding	NA	NA	NA	NA	NA	NA	NA	NA	NA	NA	NA	NA	NA	NA	NA	NA	NA	NA	-1.22233	NA	NA	NA
Microglia-specific age-repressed	ENSMUSG00000039485.8	Tspyl4	chr10	34297442	34301320	HAVANA	+	protein_coding	NA	NA	NA	NA	NA	NA	NA	NA	NA	NA	NA	NA	NA	NA	NA	NA	NA	NA	-1.20133	NA	-1.39132	NA
Microglia-specific age-repressed	ENSMUSG00000097789.2	Gm2115	chr7	84528954	84583531	HAVANA	+	protein_coding	NA	NA	NA	NA	NA	NA	NA	NA	NA	NA	NA	NA	NA	NA	NA	NA	NA	NA	-1.27002	NA	-1.41725	-1.27069
Microglia-specific age-repressed	ENSMUSG00000001349.5	Cnn1	chr9	22099216	22109630	HAVANA	+	protein_coding	NA	NA	NA	NA	NA	NA	NA	NA	NA	NA	NA	NA	NA	NA	NA	NA	NA	NA	-1.51652	NA	-1.26762	NA
Microglia-specific age-repressed	ENSMUSG00000050931.7	Sgms2	chr3	131318985	131491411	HAVANA	-	protein_coding	NA	NA	NA	NA	NA	NA	NA	NA	NA	NA	NA	NA	NA	NA	NA	NA	NA	NA	-0.846196	NA	NA	NA
Microglia-specific age-repressed	ENSMUSG00000113346.1	AC154266.1	chr13	73344667	73347384	HAVANA	-	lincRNA	NA	NA	NA	NA	NA	NA	NA	NA	NA	NA	NA	NA	NA	NA	NA	NA	NA	NA	-1.35784	NA	-1.17334	-1.51541
Microglia-specific age-repressed	ENSMUSG00000031626.17	Sorbs2	chr8	45507788	45827906	HAVANA	+	protein_coding	NA	NA	NA	NA	NA	NA	NA	NA	NA	NA	NA	NA	NA	NA	NA	NA	NA	NA	-1.43162	NA	-1.55447	NA
Microglia-specific age-repressed	ENSMUSG00000022367.7	Has2	chr15	56665627	56694539	HAVANA	-	protein_coding	NA	NA	NA	NA	NA	NA	NA	NA	NA	NA	NA	NA	NA	NA	NA	NA	NA	NA	-2.13286	NA	-2.11957	NA
Microglia-specific age-repressed	ENSMUSG00000021469.9	Msx2	chr13	53466884	53473074	HAVANA	-	protein_coding	NA	NA	NA	NA	NA	NA	NA	NA	NA	NA	NA	NA	NA	NA	NA	NA	NA	NA	-1.63938	NA	NA	NA
Microglia-specific age-repressed	ENSMUSG00000000215.11	Ins2	chr7	142678656	142743381	HAVANA	-	protein_coding	NA	NA	NA	NA	NA	NA	NA	NA	NA	NA	NA	NA	NA	NA	NA	NA	NA	NA	-1.94023	NA	-1.64261	NA
Microglia-specific age-repressed	ENSMUSG00000091243.1	Vgll3	chr16	65815633	65863057	ENSEMBL	+	protein_coding	NA	NA	NA	NA	NA	NA	NA	NA	NA	NA	NA	NA	NA	NA	NA	NA	NA	NA	-1.37014	-1.25081	-1.52998	NA
Microglia-specific age-repressed	ENSMUSG00000049670.8	Morn4	chr19	42074939	42086370	ENSEMBL	-	protein_coding	NA	NA	NA	NA	NA	NA	NA	NA	NA	NA	NA	NA	NA	NA	NA	NA	NA	NA	-1.16918	NA	-2.03009	NA
Microglia-specific age-repressed	ENSMUSG00000046314.16	Stxbp6	chr12	44852484	45074709	HAVANA	-	protein_coding	NA	NA	NA	NA	NA	NA	NA	NA	NA	NA	NA	NA	NA	NA	NA	NA	NA	NA	-1.88702	NA	-2.1857	NA
Microglia-specific age-repressed	ENSMUSG00000030494.13	Rhpn2	chr7	35334170	35392289	HAVANA	+	protein_coding	NA	NA	NA	NA	NA	NA	NA	NA	NA	NA	NA	NA	NA	NA	NA	NA	NA	NA	-1.23684	NA	-1.54731	-1.19385
Microglia-specific age-repressed	ENSMUSG00000038526.14	Car14	chr3	95897768	95904691	HAVANA	-	protein_coding	NA	NA	NA	NA	NA	NA	NA	NA	NA	NA	NA	NA	NA	NA	NA	NA	NA	NA	-1.47326	NA	-2.45353	NA
Microglia-specific age-repressed	ENSMUSG00000037813.13	D630003M21Rik	chr2	158182533	158229222	HAVANA	-	protein_coding	NA	NA	NA	NA	NA	NA	NA	NA	NA	NA	NA	NA	NA	NA	NA	NA	NA	NA	-1.1763	NA	NA	NA
Microglia-specific age-repressed	ENSMUSG00000022580.12	Rhpn1	chr15	75704280	75714410	HAVANA	+	protein_coding	NA	NA	NA	NA	NA	NA	NA	NA	NA	NA	NA	NA	NA	NA	NA	NA	NA	NA	-1.23248	NA	-1.82069	NA
Microglia-specific age-repressed	ENSMUSG00000027223.15	Mapk8ip1	chr2	92383676	92401263	HAVANA	-	protein_coding	NA	NA	NA	NA	NA	NA	NA	NA	NA	NA	NA	NA	NA	NA	NA	NA	NA	NA	-1.21139	NA	NA	NA
Microglia-specific age-repressed	ENSMUSG00000017009.3	Sdc4	chr2	164424247	164443887	HAVANA	-	protein_coding	NA	NA	NA	NA	NA	NA	NA	NA	NA	NA	NA	NA	NA	NA	NA	NA	NA	NA	-1.15812	NA	NA	NA
Microglia-specific age-repressed	ENSMUSG00000079436.3	Kcnj13	chr1	87386363	87394729	HAVANA	-	protein_coding	NA	NA	NA	NA	NA	NA	NA	NA	NA	NA	NA	NA	NA	NA	NA	NA	NA	NA	-2.00108	NA	-1.79523	-1.97356
Microglia-specific age-repressed	ENSMUSG00000030125.11	Lrrc23	chr6	124769863	124779727	HAVANA	-	protein_coding	NA	NA	NA	NA	NA	NA	NA	NA	NA	NA	NA	NA	NA	NA	NA	NA	NA	NA	-1.49907	NA	-3.2248	NA
Microglia-specific age-repressed	ENSMUSG00000034161.7	Scx	chr15	76457438	76459468	ENSEMBL	+	protein_coding	NA	NA	NA	NA	NA	NA	NA	NA	NA	NA	NA	NA	NA	NA	NA	NA	NA	NA	-1.84934	NA	-1.54351	NA
Microglia-specific age-repressed	ENSMUSG00000032839.13	Trpc1	chr9	95705082	95750375	HAVANA	-	protein_coding	NA	NA	NA	NA	NA	NA	NA	NA	NA	NA	NA	NA	NA	NA	NA	NA	NA	NA	-1.2114	NA	NA	NA
Microglia-specific age-repressed	ENSMUSG00000026479.13	Lamc2	chr1	153122756	153186447	HAVANA	-	protein_coding	NA	NA	NA	NA	NA	NA	NA	NA	NA	NA	NA	NA	NA	NA	NA	NA	NA	NA	-1.08194	NA	NA	NA
Microglia-specific age-repressed	ENSMUSG00000029122.11	Evc	chr5	37289098	37336894	HAVANA	-	protein_coding	NA	NA	NA	NA	NA	NA	NA	NA	NA	NA	NA	NA	NA	NA	NA	NA	NA	NA	-1.44453	NA	-1.61627	NA
Microglia-specific age-repressed	ENSMUSG00000030554.16	Synm	chr7	67730160	67759742	HAVANA	-	protein_coding	NA	NA	NA	NA	NA	NA	NA	NA	NA	NA	NA	NA	NA	NA	NA	NA	NA	NA	-1.54711	NA	-2.21045	NA
Microglia-specific age-repressed	ENSMUSG00000066113.16	Adamtsl1	chr4	85514172	86428385	HAVANA	+	protein_coding	NA	NA	NA	NA	NA	NA	NA	NA	NA	NA	NA	NA	NA	NA	NA	NA	NA	NA	-1.86778	NA	-2.6023	NA
Microglia-specific age-repressed	ENSMUSG00000033965.10	Slc16a2	chrX	103697414	103821983	HAVANA	-	protein_coding	NA	NA	NA	NA	NA	NA	NA	NA	NA	NA	NA	NA	NA	NA	NA	NA	NA	NA	-1.39363	NA	-1.71879	NA
Microglia-specific age-repressed	ENSMUSG00000063568.11	Jazf1	chr6	52768797	53068631	HAVANA	-	protein_coding	NA	NA	NA	NA	NA	NA	NA	NA	NA	NA	NA	NA	NA	NA	NA	NA	NA	NA	-1.51664	NA	-1.98528	NA
Microglia-specific age-repressed	ENSMUSG00000042451.12	Mybph	chr1	134193448	134201232	HAVANA	+	protein_coding	NA	NA	NA	NA	NA	NA	NA	NA	NA	NA	NA	NA	NA	NA	NA	NA	NA	NA	-1.07819	NA	NA	NA
Microglia-specific age-repressed	ENSMUSG00000072214.6	2005-09-01	chr16	18621811	18629938	ENSEMBL	-	protein_coding	NA	NA	NA	NA	NA	NA	NA	NA	NA	NA	NA	NA	NA	NA	NA	NA	NA	NA	-1.12738	NA	-1.49735	-1.17312
Microglia-specific age-repressed	ENSMUSG00000066456.14	Hmgn3	chr9	83109948	83146685	HAVANA	-	protein_coding	NA	NA	NA	NA	NA	NA	NA	NA	NA	NA	NA	NA	NA	NA	NA	NA	NA	NA	-0.937424	NA	-0.958424	NA
Microglia-specific age-repressed	ENSMUSG00000024558.12	Mapk4	chr18	73928486	74065359	HAVANA	-	protein_coding	NA	NA	NA	NA	NA	NA	NA	NA	NA	NA	NA	NA	NA	NA	NA	NA	NA	NA	-1.0615	NA	-1.35043	NA
Microglia-specific age-repressed	ENSMUSG00000040936.15	Ulk4	chr9	120955351	121277197	HAVANA	-	protein_coding	NA	NA	NA	NA	NA	NA	NA	NA	NA	NA	NA	NA	NA	NA	NA	NA	NA	NA	-0.902116	NA	-1.88417	NA
Microglia-specific age-repressed	ENSMUSG00000034614.14	Pik3ip1	chr11	3330401	3342971	HAVANA	+	protein_coding	NA	NA	NA	NA	NA	NA	NA	NA	NA	NA	NA	NA	NA	NA	NA	NA	NA	NA	-1.00476	NA	-1.65022	NA
Microglia-specific age-repressed	ENSMUSG00000026442.14	Nfasc	chr1	132564690	132741797	HAVANA	-	protein_coding	NA	NA	NA	NA	NA	NA	NA	NA	NA	NA	NA	NA	NA	NA	NA	NA	NA	NA	-1.30622	NA	-1.93593	NA
Microglia-specific age-repressed	ENSMUSG00000063873.10	Slc24a3	chr2	145167754	145642166	HAVANA	+	protein_coding	NA	NA	NA	NA	NA	NA	NA	NA	NA	NA	NA	NA	NA	NA	NA	NA	NA	NA	-1.06221	NA	-2.00484	-1.46015
Microglia-specific age-repressed	ENSMUSG00000039431.16	Mtmr7	chr8	40551095	40634797	HAVANA	-	protein_coding	NA	NA	NA	NA	NA	NA	NA	NA	NA	NA	NA	NA	NA	NA	NA	NA	NA	NA	-1.03732	NA	NA	NA
Microglia-specific age-repressed	ENSMUSG00000024827.9	Gldc	chr19	30098449	30175418	ENSEMBL	-	protein_coding	NA	NA	NA	NA	NA	NA	NA	NA	NA	NA	NA	NA	NA	NA	NA	NA	NA	NA	-1.12085	NA	-1.31	NA
Microglia-specific age-repressed	ENSMUSG00000075312.4	Gm13597	chr2	68554555	68554929	HAVANA	+	processed_pseudogene	NA	NA	NA	NA	NA	NA	NA	NA	NA	NA	NA	NA	NA	NA	NA	NA	NA	NA	-3.44554	NA	NA	NA
Microglia-specific age-repressed	ENSMUSG00000102543.5	Pcdhgc5	chr18	37819513	37841873	HAVANA	+	protein_coding	NA	NA	NA	NA	NA	NA	NA	NA	NA	NA	NA	NA	NA	NA	NA	NA	NA	NA	-1.31793	NA	-1.64815	NA
Microglia-specific age-repressed	ENSMUSG00000018672.15	Copz2	chr11	96849870	96861203	HAVANA	+	protein_coding	NA	NA	NA	NA	NA	NA	NA	NA	NA	NA	NA	NA	NA	NA	NA	NA	NA	NA	-0.984943	NA	-0.972434	NA
Microglia-specific age-repressed	ENSMUSG00000062542.11	Syt9	chr7	107370728	107548656	HAVANA	+	protein_coding	NA	NA	NA	NA	NA	NA	NA	NA	NA	NA	NA	NA	NA	NA	NA	NA	NA	NA	-1.38725	NA	NA	NA
Microglia-specific age-repressed	ENSMUSG00000020173.17	Cobl	chr11	12236608	12464960	HAVANA	-	protein_coding	NA	NA	NA	NA	NA	NA	NA	NA	NA	NA	NA	NA	NA	NA	NA	NA	NA	NA	-1.29135	NA	-1.3612	NA
Microglia-specific age-repressed	ENSMUSG00000041734.15	Kirrel	chr3	87078593	87174747	HAVANA	-	protein_coding	NA	NA	NA	NA	NA	NA	NA	NA	NA	NA	NA	NA	NA	NA	NA	NA	NA	NA	-1.00373	NA	-1.18262	NA
Microglia-specific age-repressed	ENSMUSG00000050730.17	Arhgap42	chr9	8994329	9239101	HAVANA	-	protein_coding	NA	NA	NA	NA	NA	NA	NA	NA	NA	NA	NA	NA	NA	NA	NA	NA	NA	NA	-1.19407	NA	-1.2359	NA
Microglia-specific age-repressed	ENSMUSG00000040118.15	Cacna2d1	chr5	15934691	16374511	HAVANA	+	protein_coding	NA	NA	NA	NA	NA	NA	NA	NA	NA	NA	NA	NA	NA	NA	NA	NA	NA	NA	-1.22379	-1.2788	-1.57717	NA
Microglia-specific age-repressed	ENSMUSG00000003279.16	Dlgap1	chr17	69969073	70821413	HAVANA	+	protein_coding	NA	NA	NA	NA	NA	NA	NA	NA	NA	NA	NA	NA	NA	NA	NA	NA	NA	NA	-1.64528	NA	-1.71071	NA
Microglia-specific age-repressed	ENSMUSG00000033377.14	Palmd	chr3	116918258	116968987	HAVANA	-	protein_coding	NA	NA	NA	NA	NA	NA	NA	NA	NA	NA	NA	NA	NA	NA	NA	NA	NA	NA	-1.41702	NA	-1.67347	NA
Microglia-specific age-repressed	ENSMUSG00000034460.9	Six4	chr12	73099609	73113456	HAVANA	-	protein_coding	NA	NA	NA	NA	NA	NA	NA	NA	NA	NA	NA	NA	NA	NA	NA	NA	NA	NA	-0.957256	-1.15793	NA	NA
Microglia-specific age-repressed	ENSMUSG00000045348.16	Nyap1	chr5	137729899	137741607	HAVANA	-	protein_coding	NA	NA	NA	NA	NA	NA	NA	NA	NA	NA	NA	NA	NA	NA	NA	NA	NA	NA	-0.994957	NA	-1.20051	NA
Microglia-specific age-repressed	ENSMUSG00000026610.13	Esrrg	chr1	187608791	188214885	HAVANA	+	protein_coding	NA	NA	NA	NA	NA	NA	NA	NA	NA	NA	NA	NA	NA	NA	NA	NA	NA	NA	-1.29584	NA	-1.43754	NA
Microglia-specific age-repressed	ENSMUSG00000035948.13	Acss3	chr10	106933517	107123668	HAVANA	-	protein_coding	NA	NA	NA	NA	NA	NA	NA	NA	NA	NA	NA	NA	NA	NA	NA	NA	NA	NA	-1.76829	NA	-1.62593	NA
Microglia-specific age-repressed	ENSMUSG00000025812.17	Pard3	chr8	127063893	127612286	HAVANA	+	protein_coding	NA	NA	NA	NA	NA	NA	NA	NA	NA	NA	NA	NA	NA	NA	NA	NA	NA	NA	-0.878079	NA	-1.22434	NA
Microglia-specific age-repressed	ENSMUSG00000041347.5	Bdkrb1	chr12	105603085	105605428	HAVANA	+	protein_coding	NA	NA	NA	NA	NA	NA	NA	NA	NA	NA	NA	NA	NA	NA	NA	NA	NA	NA	-2.00307	NA	-1.93766	NA
Microglia-specific age-repressed	ENSMUSG00000021913.7	Ogdhl	chr14	32322019	32347820	ENSEMBL	+	protein_coding	NA	NA	NA	NA	NA	NA	NA	NA	NA	NA	NA	NA	NA	NA	NA	NA	NA	NA	-1.17495	NA	-1.53233	NA
Microglia-specific age-repressed	ENSMUSG00000035246.16	Pcyt1b	chrX	93654863	93749951	HAVANA	+	protein_coding	NA	NA	NA	NA	NA	NA	NA	NA	NA	NA	NA	NA	NA	NA	NA	NA	NA	NA	-1.40004	NA	NA	NA
Microglia-specific age-repressed	ENSMUSG00000049092.10	Gpr137c	chr14	45219719	45281230	HAVANA	+	protein_coding	NA	NA	NA	NA	NA	NA	NA	NA	NA	NA	NA	NA	NA	NA	NA	NA	NA	NA	-1.70187	NA	-2.08693	NA
Microglia-specific age-repressed	ENSMUSG00000029851.5	Tcaf2	chr6	42623016	42645254	HAVANA	-	protein_coding	NA	NA	NA	NA	NA	NA	NA	NA	NA	NA	NA	NA	NA	NA	NA	NA	NA	NA	-1.06983	NA	NA	NA
Microglia-specific age-repressed	ENSMUSG00000038074.16	Fkbp14	chr6	54577604	54597308	HAVANA	-	protein_coding	NA	NA	NA	NA	NA	NA	NA	NA	NA	NA	NA	NA	NA	NA	NA	NA	NA	NA	-0.91364	NA	-1.41266	NA
Microglia-specific age-repressed	ENSMUSG00000038917.4	3930402G23Rik	chr8	10924427	10928696	HAVANA	-	lincRNA	NA	NA	NA	NA	NA	NA	NA	NA	NA	NA	NA	NA	NA	NA	NA	NA	NA	NA	-1.57916	NA	-1.94962	NA
Microglia-specific age-repressed	ENSMUSG00000001555.10	Fkbp10	chr11	100415697	100424824	HAVANA	+	protein_coding	NA	NA	NA	NA	NA	NA	NA	NA	NA	NA	NA	NA	NA	NA	NA	NA	NA	NA	-1.36096	NA	-1.23187	NA
Microglia-specific age-repressed	ENSMUSG00000049420.9	Tmem200a	chr10	25912331	26079052	HAVANA	-	protein_coding	NA	NA	NA	NA	NA	NA	NA	NA	NA	NA	NA	NA	NA	NA	NA	NA	NA	NA	-1.61316	NA	-1.595	NA
Microglia-specific age-repressed	ENSMUSG00000112117.1	RMST	chr10	92071037	92165170	HAVANA	-	lincRNA	NA	NA	NA	NA	NA	NA	NA	NA	NA	NA	NA	NA	NA	NA	NA	NA	NA	NA	-1.51317	NA	-2.69012	NA
Microglia-specific age-repressed	ENSMUSG00000022525.13	Hrasls	chr16	29209695	29230531	HAVANA	+	protein_coding	NA	NA	NA	NA	NA	NA	NA	NA	NA	NA	NA	NA	NA	NA	NA	NA	NA	NA	-1.57106	NA	-1.57955	NA
Microglia-specific age-repressed	ENSMUSG00000038319.14	Kcnh2	chr5	24319589	24351604	HAVANA	-	protein_coding	NA	NA	NA	NA	NA	NA	NA	NA	NA	NA	NA	NA	NA	NA	NA	NA	NA	NA	-1.5382	NA	-1.63667	NA
Microglia-specific age-repressed	ENSMUSG00000022514.14	Il1rap	chr16	26581704	26730117	HAVANA	+	protein_coding	NA	NA	NA	NA	NA	NA	NA	NA	NA	NA	NA	NA	NA	NA	NA	NA	NA	NA	-0.977357	NA	-0.901426	NA
Microglia-specific age-repressed	ENSMUSG00000049929.7	Lpar4	chrX	106920625	106933900	HAVANA	+	protein_coding	NA	NA	NA	NA	NA	NA	NA	NA	NA	NA	NA	NA	NA	NA	NA	NA	NA	NA	-1.24067	NA	-2.00553	NA
Microglia-specific age-repressed	ENSMUSG00000022602.14	Arc	chr15	74669083	74672570	HAVANA	-	protein_coding	NA	NA	NA	NA	NA	NA	NA	NA	NA	NA	NA	NA	NA	NA	NA	NA	NA	NA	-1.01682	NA	NA	NA
Microglia-specific age-repressed	ENSMUSG00000096035.2	Gm1045	chr5	91987475	91995320	HAVANA	+	protein_coding	NA	NA	NA	NA	NA	NA	NA	NA	NA	NA	NA	NA	NA	NA	NA	NA	NA	NA	-1.28127	NA	NA	NA
Microglia-specific age-repressed	ENSMUSG00000026831.16	1700007K13Rik	chr2	28462001	28466332	HAVANA	-	protein_coding	NA	NA	NA	NA	NA	NA	NA	NA	NA	NA	NA	NA	NA	NA	NA	NA	NA	NA	-1.41704	NA	NA	NA
Microglia-specific age-repressed	ENSMUSG00000035551.6	Igfbpl1	chr4	45809468	45826923	HAVANA	-	protein_coding	NA	NA	NA	NA	NA	NA	NA	NA	NA	NA	NA	NA	NA	NA	NA	NA	NA	NA	-1.16412	NA	-1.39699	-1.38052
Microglia-specific age-repressed	ENSMUSG00000003992.14	Ssbp2	chr13	91460283	91703429	HAVANA	+	protein_coding	NA	NA	NA	NA	NA	NA	NA	NA	NA	NA	NA	NA	NA	NA	NA	NA	NA	NA	-1.03311	NA	-1.29422	NA
Microglia-specific age-repressed	ENSMUSG00000020333.17	Acsl6	chr11	54303798	54364756	HAVANA	+	protein_coding	NA	NA	NA	NA	NA	NA	NA	NA	NA	NA	NA	NA	NA	NA	NA	NA	NA	NA	-1.13252	NA	-1.44568	NA
Microglia-specific age-repressed	ENSMUSG00000073650.8	Catip	chr1	74362108	74369321	HAVANA	+	protein_coding	NA	NA	NA	NA	NA	NA	NA	NA	NA	NA	NA	NA	NA	NA	NA	NA	NA	NA	-1.16263	NA	-1.34881	-1.85166
Microglia-specific age-repressed	ENSMUSG00000024059.9	Clip4	chr17	71781947	71858351	ENSEMBL	+	protein_coding	NA	NA	NA	NA	NA	NA	NA	NA	NA	NA	NA	NA	NA	NA	NA	NA	NA	NA	-1.20993	NA	-1.56355	-1.56264
Microglia-specific age-repressed	ENSMUSG00000061524.8	Zic2	chr14	122475435	122479852	HAVANA	+	protein_coding	NA	NA	NA	NA	NA	NA	NA	NA	NA	NA	NA	NA	NA	NA	NA	NA	NA	NA	-1.36624	NA	NA	NA
Microglia-specific age-repressed	ENSMUSG00000044279.15	Crb3	chr17	57059105	57065918	HAVANA	+	protein_coding	NA	NA	NA	NA	NA	NA	NA	NA	NA	NA	NA	NA	NA	NA	NA	NA	NA	NA	-1.90779	NA	-2.54031	NA
Microglia-specific age-repressed	ENSMUSG00000040280.10	Ndufa4l2	chr10	127514967	127517154	HAVANA	+	protein_coding	NA	NA	NA	NA	NA	NA	NA	NA	NA	NA	NA	NA	NA	NA	NA	NA	NA	NA	-2.70681	NA	NA	NA
Microglia-specific age-repressed	ENSMUSG00000029651.16	Mtus2	chr5	147957320	148316065	HAVANA	+	protein_coding	NA	NA	NA	NA	NA	NA	NA	NA	NA	NA	NA	NA	NA	NA	NA	NA	NA	NA	-0.859264	NA	-0.83105	NA
Microglia-specific age-repressed	ENSMUSG00000042215.8	Bag2	chr1	33745484	33757795	HAVANA	-	protein_coding	NA	NA	NA	NA	NA	NA	NA	NA	NA	NA	NA	NA	NA	NA	NA	NA	NA	NA	-1.00876	NA	-0.988554	NA
Microglia-specific age-repressed	ENSMUSG00000035934.16	Pknox2	chr9	36890982	37147407	HAVANA	-	protein_coding	NA	NA	NA	NA	NA	NA	NA	NA	NA	NA	NA	NA	NA	NA	NA	NA	NA	NA	-0.838934	-0.958861	-1.34286	NA
Microglia-specific age-repressed	ENSMUSG00000025321.14	Itgb8	chr12	119158022	119238802	HAVANA	-	protein_coding	NA	NA	NA	NA	NA	NA	NA	NA	NA	-1.71256	NA	NA	NA	NA	NA	NA	NA	NA	-1.22362	NA	-1.42365	NA
Microglia-specific age-repressed	ENSMUSG00000061322.15	Dnaic1	chr4	41569775	41638158	HAVANA	+	protein_coding	NA	NA	NA	NA	NA	NA	NA	NA	NA	NA	NA	NA	NA	NA	NA	NA	NA	NA	-1.50189	NA	-2.29969	NA
Microglia-specific age-repressed	ENSMUSG00000026211.17	Obsl1	chr1	75479310	75506452	HAVANA	-	protein_coding	NA	NA	NA	NA	NA	NA	NA	NA	NA	NA	NA	NA	NA	NA	NA	NA	NA	NA	-1.16851	NA	-1.18375	NA
Microglia-specific age-repressed	ENSMUSG00000034981.9	Parm1	chr5	91517615	91626894	HAVANA	+	protein_coding	NA	NA	NA	NA	NA	NA	NA	NA	NA	NA	NA	NA	NA	NA	NA	NA	NA	NA	-1.87187	NA	NA	NA
Microglia-specific age-repressed	ENSMUSG00000032875.8	Arhgef17	chr7	100869752	100932107	HAVANA	-	protein_coding	NA	NA	NA	NA	NA	NA	NA	NA	NA	NA	NA	NA	NA	NA	NA	NA	NA	NA	-1.22618	NA	-1.5696	NA
Microglia-specific age-repressed	ENSMUSG00000037541.21	Shank2	chr7	144001928	144424494	HAVANA	+	protein_coding	NA	NA	NA	NA	NA	NA	NA	NA	NA	NA	NA	NA	NA	NA	NA	NA	NA	NA	-1.34107	NA	NA	NA
Microglia-specific age-repressed	ENSMUSG00000040666.18	Sh3bgr	chr16	96200470	96228933	HAVANA	+	protein_coding	NA	NA	NA	NA	NA	NA	NA	NA	NA	NA	NA	NA	NA	NA	NA	NA	NA	NA	-1.88273	NA	-2.62472	NA
Microglia-specific age-repressed	ENSMUSG00000032172.8	Olfm2	chr9	20667690	20746349	HAVANA	-	protein_coding	NA	NA	NA	NA	NA	NA	NA	NA	NA	NA	NA	NA	NA	NA	NA	NA	NA	NA	-1.21299	NA	NA	NA
Microglia-specific age-repressed	ENSMUSG00000033029.12	1700088E04Rik	chr15	79129349	79141253	HAVANA	-	protein_coding	NA	NA	NA	NA	NA	NA	NA	NA	NA	NA	NA	NA	NA	NA	NA	NA	NA	NA	-0.969064	NA	-2.09617	NA
Microglia-specific age-repressed	ENSMUSG00000070473.4	Cldn3	chr5	134986214	134987472	HAVANA	+	protein_coding	NA	NA	NA	NA	NA	NA	NA	NA	NA	NA	NA	NA	NA	NA	NA	NA	NA	NA	-1.45731	NA	NA	NA
Microglia-specific age-repressed	ENSMUSG00000029126.7	Nsg1	chr5	38137192	38159907	HAVANA	-	protein_coding	NA	NA	NA	NA	NA	NA	NA	NA	NA	NA	NA	NA	NA	NA	NA	NA	NA	NA	-2.07547	NA	NA	NA
Microglia-specific age-repressed	ENSMUSG00000020473.13	Aebp1	chr11	5861947	5872088	HAVANA	+	protein_coding	NA	NA	NA	NA	NA	NA	NA	NA	NA	NA	NA	NA	NA	NA	NA	NA	NA	NA	-1.48648	NA	-1.70278	NA
Microglia-specific age-repressed	ENSMUSG00000085949.1	Gm14275	chr2	172288133	172290520	HAVANA	+	lincRNA	NA	NA	NA	NA	NA	NA	NA	NA	NA	NA	NA	NA	NA	NA	NA	NA	NA	NA	-2.35005	NA	NA	NA
Microglia-specific age-repressed	ENSMUSG00000031245.8	Hmgn5	chrX	109004534	109013404	HAVANA	-	protein_coding	NA	NA	NA	NA	NA	NA	NA	NA	NA	NA	NA	NA	NA	NA	NA	NA	NA	NA	-1.42111	NA	NA	NA
Microglia-specific age-repressed	ENSMUSG00000048096.7	Lmod1	chr1	135324807	135368065	HAVANA	+	protein_coding	NA	NA	NA	NA	NA	NA	NA	NA	NA	NA	NA	NA	NA	NA	NA	NA	NA	NA	-1.48872	NA	-2.04205	NA
Microglia-specific age-repressed	ENSMUSG00000028128.13	F3	chr3	121723537	121735048	HAVANA	+	protein_coding	NA	NA	NA	NA	NA	NA	NA	NA	NA	NA	NA	NA	NA	NA	NA	NA	NA	NA	-0.898551	NA	-1.11192	NA
Microglia-specific age-repressed	ENSMUSG00000037736.18	Limch1	chr5	66745827	67057158	HAVANA	+	protein_coding	NA	NA	NA	NA	NA	NA	NA	NA	NA	NA	NA	NA	NA	NA	NA	NA	NA	NA	-1.01665	NA	-1.19178	NA
Microglia-specific age-repressed	ENSMUSG00000030630.16	Fah	chr7	84585159	84606722	HAVANA	-	protein_coding	NA	NA	NA	NA	NA	NA	NA	NA	NA	NA	NA	NA	NA	NA	NA	NA	NA	NA	-1.02262	NA	NA	NA
Microglia-specific age-repressed	ENSMUSG00000068417.7	Pnp2	chr14	50955992	50964749	HAVANA	+	protein_coding	NA	NA	NA	NA	NA	NA	NA	NA	NA	NA	NA	NA	NA	NA	NA	NA	NA	NA	-0.970965	NA	-1.21522	NA
Microglia-specific age-repressed	ENSMUSG00000026984.4	Il1f6	chr2	24215418	24225702	HAVANA	+	protein_coding	NA	NA	NA	NA	NA	NA	NA	NA	NA	NA	NA	NA	NA	NA	NA	NA	NA	NA	-2.45824	NA	NA	NA
Microglia-specific age-repressed	ENSMUSG00000006784.14	Ttc25	chr11	100545607	100572568	HAVANA	+	protein_coding	NA	NA	NA	NA	NA	NA	NA	NA	NA	NA	NA	NA	NA	NA	NA	NA	NA	NA	-0.842942	NA	-0.928944	NA
Microglia-specific age-repressed	ENSMUSG00000053199.13	Arhgap20	chr9	51765337	51853856	HAVANA	+	protein_coding	NA	NA	NA	NA	NA	NA	NA	NA	NA	NA	NA	NA	NA	NA	NA	NA	NA	NA	-1.07705	NA	-1.20098	NA
Microglia-specific age-repressed	ENSMUSG00000031292.14	Cdkl5	chrX	160771923	160994704	HAVANA	-	protein_coding	NA	NA	NA	NA	NA	NA	NA	NA	NA	NA	NA	NA	NA	NA	NA	NA	NA	NA	-1.1197	NA	NA	NA
Microglia-specific age-repressed	ENSMUSG00000031750.15	Il34	chr8	110741829	110805924	HAVANA	-	protein_coding	NA	NA	NA	NA	NA	NA	NA	NA	NA	NA	NA	NA	NA	NA	NA	NA	NA	NA	-1.22762	NA	-1.8438	NA
Microglia-specific age-repressed	ENSMUSG00000032060.10	Cryab	chr9	50751325	50756636	HAVANA	+	protein_coding	NA	NA	NA	NA	NA	NA	NA	NA	NA	NA	NA	NA	NA	NA	NA	NA	NA	NA	-0.816845	NA	NA	NA
Microglia-specific age-repressed	ENSMUSG00000032387.15	Rbpms2	chr9	65629648	65660528	HAVANA	+	protein_coding	NA	NA	NA	NA	NA	NA	NA	NA	NA	NA	NA	-2.59803	NA	NA	NA	NA	NA	NA	-0.917821	-1.04434	NA	NA
Microglia-specific age-repressed	ENSMUSG00000020681.14	Ace	chr11	105967945	105989964	HAVANA	+	protein_coding	NA	NA	NA	NA	NA	NA	NA	NA	NA	NA	NA	NA	NA	NA	NA	NA	NA	NA	-1.27237	NA	-1.71617	NA
Microglia-specific age-repressed	ENSMUSG00000028583.14	Pdpn	chr4	143267431	143299564	HAVANA	-	protein_coding	NA	NA	NA	NA	NA	NA	NA	NA	NA	NA	NA	NA	NA	NA	NA	NA	NA	NA	-0.962343	NA	NA	NA
Microglia-specific age-repressed	ENSMUSG00000015401.12	Tmem27	chrX	164088830	164118860	HAVANA	+	protein_coding	NA	NA	NA	NA	NA	NA	NA	NA	NA	NA	NA	NA	NA	NA	NA	NA	NA	NA	-1.41433	NA	-1.79927	NA
Microglia-specific age-repressed	ENSMUSG00000040978.4	Gm11992	chr11	9048594	9069356	HAVANA	+	protein_coding	NA	NA	NA	NA	NA	NA	NA	NA	NA	NA	NA	NA	NA	NA	NA	NA	NA	NA	-1.00857	NA	-2.02217	NA
Microglia-specific age-repressed	ENSMUSG00000082229.1	Nap1l2	chrX	103184176	103186640	HAVANA	-	protein_coding	NA	NA	NA	NA	NA	NA	NA	NA	NA	NA	NA	NA	NA	NA	NA	NA	NA	NA	-1.08423	NA	-1.20612	NA
Microglia-specific age-repressed	ENSMUSG00000052957.7	Gas1	chr13	60174405	60177365	HAVANA	-	protein_coding	NA	NA	NA	NA	NA	NA	NA	NA	NA	NA	NA	NA	NA	NA	NA	NA	NA	NA	-2.28085	NA	NA	NA
Microglia-specific age-repressed	ENSMUSG00000042686.5	Jph1	chr1	16964560	17097889	HAVANA	-	protein_coding	NA	NA	NA	NA	NA	NA	NA	NA	NA	NA	NA	NA	NA	NA	NA	NA	NA	NA	-1.11218	NA	NA	NA
Microglia-specific age-repressed	ENSMUSG00000025504.13	Eps8l2	chr7	141338880	141363020	HAVANA	+	protein_coding	NA	NA	NA	NA	NA	NA	NA	NA	NA	NA	NA	NA	NA	NA	NA	NA	NA	NA	-1.17041	NA	-1.70591	NA
Microglia-specific age-repressed	ENSMUSG00000075302.10	Erich2	chr2	70508819	70540884	HAVANA	+	protein_coding	NA	NA	NA	NA	NA	NA	NA	NA	NA	NA	NA	NA	NA	NA	NA	NA	NA	NA	-1.67387	NA	-2.73141	NA
Microglia-specific age-repressed	ENSMUSG00000037979.13	Ccdc92	chr5	124834418	124862424	HAVANA	-	protein_coding	NA	NA	NA	NA	NA	NA	NA	NA	NA	NA	NA	NA	NA	NA	NA	NA	NA	NA	-1.08549	NA	-1.37917	NA
Microglia-specific age-repressed	ENSMUSG00000081113.1	Gm7308	chr6	127282063	127282509	HAVANA	-	processed_pseudogene	NA	NA	NA	NA	NA	NA	NA	NA	NA	NA	NA	NA	NA	NA	NA	NA	NA	NA	-3.01207	NA	NA	NA
Microglia-specific age-repressed	ENSMUSG00000046623.8	Gjb4	chr4	127351086	127354081	HAVANA	-	protein_coding	NA	NA	NA	NA	NA	NA	NA	NA	NA	NA	NA	NA	NA	NA	NA	NA	NA	NA	-0.962011	NA	NA	-1.2251
Microglia-specific age-repressed	ENSMUSG00000043333.12	Rhbdl2	chr4	123787874	123829904	HAVANA	+	protein_coding	NA	NA	NA	NA	NA	NA	NA	NA	NA	NA	NA	NA	NA	NA	NA	NA	NA	NA	-1.06477	NA	NA	NA
Microglia-specific age-repressed	ENSMUSG00000037621.8	Atoh8	chr6	72206177	72235577	HAVANA	-	protein_coding	NA	NA	NA	NA	NA	NA	NA	NA	NA	NA	NA	NA	NA	NA	NA	NA	NA	NA	-1.42392	NA	NA	NA
Microglia-specific age-repressed	ENSMUSG00000097487.7	Ptges3l	chr11	101418812	101425333	HAVANA	-	protein_coding	NA	NA	NA	NA	NA	NA	NA	NA	NA	6.70745	NA	NA	NA	NA	NA	NA	NA	NA	-0.976544	NA	NA	NA
Microglia-specific age-repressed	ENSMUSG00000041119.11	Pde9a	chr17	31386234	31476310	HAVANA	+	protein_coding	NA	NA	NA	NA	NA	NA	NA	NA	NA	NA	NA	NA	NA	NA	NA	NA	NA	NA	-1.48551	NA	-1.96682	-1.96563
Microglia-specific age-repressed	ENSMUSG00000064115.13	Cadm2	chr16	66655421	67620908	HAVANA	-	protein_coding	NA	NA	NA	NA	NA	NA	NA	NA	NA	NA	NA	NA	NA	NA	NA	NA	NA	NA	-1.36663	NA	-2.31429	NA
Microglia-specific age-repressed	ENSMUSG00000034245.10	Hdac11	chr6	91156665	91174692	HAVANA	+	protein_coding	NA	NA	NA	NA	NA	NA	NA	NA	NA	NA	NA	NA	NA	NA	NA	NA	NA	NA	-0.903608	NA	-1.37953	NA
Microglia-specific age-repressed	ENSMUSG00000036885.14	Arhgef26	chr3	62338344	62462221	HAVANA	+	protein_coding	NA	NA	NA	NA	NA	NA	NA	NA	NA	NA	NA	NA	NA	NA	NA	NA	NA	NA	-0.97658	-1.14284	-1.15362	NA
Microglia-specific age-repressed	ENSMUSG00000049493.13	Pls1	chr9	95752642	95845311	HAVANA	-	protein_coding	NA	NA	NA	NA	NA	NA	NA	NA	NA	NA	NA	NA	NA	NA	NA	NA	NA	NA	-1.27927	NA	NA	NA
Microglia-specific age-repressed	ENSMUSG00000063975.13	Slco1a5	chr6	142234227	142322981	HAVANA	-	protein_coding	NA	NA	NA	NA	NA	NA	NA	NA	NA	NA	NA	NA	NA	NA	NA	NA	NA	NA	-1.34675	NA	-1.42394	NA
Microglia-specific age-repressed	ENSMUSG00000001333.9	Sync	chr4	129287617	129308559	HAVANA	+	protein_coding	NA	NA	NA	NA	NA	NA	NA	NA	NA	NA	NA	NA	NA	NA	NA	NA	NA	NA	-1.11705	NA	NA	NA
Microglia-specific age-repressed	ENSMUSG00000019789.9	Hey2	chr10	30832359	30842801	HAVANA	-	protein_coding	NA	NA	NA	NA	NA	NA	NA	NA	NA	NA	NA	NA	NA	NA	NA	NA	NA	NA	-1.36899	NA	NA	NA
Microglia-specific age-repressed	ENSMUSG00000003354.5	Ccdc65	chr15	98708207	98723326	ENSEMBL	+	protein_coding	NA	NA	NA	NA	NA	NA	NA	NA	NA	NA	NA	NA	NA	NA	NA	NA	NA	NA	-1.27945	NA	-1.62703	NA
Microglia-specific age-repressed	ENSMUSG00000070047.14	Fat1	chr8	44935447	45052257	HAVANA	+	protein_coding	NA	NA	NA	NA	NA	NA	NA	NA	NA	NA	NA	NA	NA	NA	NA	NA	NA	NA	-0.806785	NA	-1.1375	NA
Microglia-specific age-repressed	ENSMUSG00000020695.14	Mrc2	chr11	105292643	105351139	HAVANA	+	protein_coding	NA	NA	NA	NA	NA	NA	NA	NA	NA	NA	NA	NA	NA	NA	NA	NA	NA	NA	-1.05306	NA	-1.57524	NA
Microglia-specific age-repressed	ENSMUSG00000059434.8	Gckr	chr5	31297443	31327314	HAVANA	+	protein_coding	NA	NA	NA	NA	NA	NA	NA	NA	NA	NA	NA	NA	NA	NA	NA	NA	NA	NA	-1.68118	NA	NA	NA
Microglia-specific age-repressed	ENSMUSG00000021806.3	Nid2	chr14	19751257	19811787	ENSEMBL	+	protein_coding	NA	NA	NA	NA	NA	NA	NA	NA	NA	NA	NA	NA	NA	NA	NA	NA	NA	NA	-1.1104	NA	-1.38116	NA
Microglia-specific age-repressed	ENSMUSG00000029913.14	Prdm5	chr6	65778988	65937010	HAVANA	+	protein_coding	NA	NA	NA	NA	NA	NA	NA	NA	NA	NA	NA	NA	NA	NA	NA	NA	NA	NA	-1.05364	NA	-1.34936	NA
Microglia-specific age-repressed	ENSMUSG00000033389.16	Arhgap44	chr11	65002039	65162961	HAVANA	-	protein_coding	NA	NA	NA	NA	NA	NA	NA	NA	NA	NA	NA	NA	NA	NA	NA	NA	NA	NA	-0.926026	-1.18464	-1.55656	NA
Microglia-specific age-repressed	ENSMUSG00000096956.2	Snhg18	chr15	32240565	32244662	HAVANA	-	lincRNA	NA	NA	NA	NA	NA	NA	NA	NA	NA	NA	NA	NA	NA	NA	NA	NA	NA	NA	-1.56778	NA	-4.34541	NA
Microglia-specific age-repressed	ENSMUSG00000042804.13	Gpr153	chr4	152274232	152285337	HAVANA	+	protein_coding	NA	NA	NA	NA	NA	NA	NA	NA	NA	NA	NA	NA	NA	NA	NA	NA	NA	NA	-0.988971	NA	NA	NA
Microglia-specific age-repressed	ENSMUSG00000108358.1	Gm44509	chr7	55973519	55974842	HAVANA	-	TEC	NA	NA	NA	NA	NA	NA	NA	NA	NA	NA	NA	NA	NA	NA	NA	NA	NA	NA	-1.02776	NA	-1.7999	-1.72592
Microglia-specific age-repressed	ENSMUSG00000025265.14	Fgd1	chrX	151046150	151089521	HAVANA	+	protein_coding	NA	NA	NA	NA	NA	NA	NA	NA	NA	NA	NA	NA	NA	NA	NA	NA	NA	NA	-0.819724	-1.20949	-1.00736	NA
Microglia-specific age-repressed	ENSMUSG00000048029.10	Eno4	chr19	58943425	58971421	HAVANA	+	protein_coding	NA	NA	NA	NA	NA	NA	NA	NA	NA	NA	NA	NA	NA	NA	NA	NA	NA	NA	-0.915182	-1.46799	-1.31558	NA
Microglia-specific age-repressed	ENSMUSG00000071324.11	Armc2	chr10	41914990	42018442	HAVANA	-	protein_coding	NA	NA	NA	NA	NA	NA	NA	NA	NA	NA	NA	NA	NA	NA	NA	NA	NA	NA	-1.26336	NA	-2.14424	-2.12053
Microglia-specific age-repressed	ENSMUSG00000000901.16	Mmp11	chr10	75923222	75936496	HAVANA	-	protein_coding	NA	NA	NA	NA	NA	NA	NA	NA	NA	NA	NA	NA	NA	NA	NA	NA	NA	NA	-1.06569	NA	NA	NA
Microglia-specific age-repressed	ENSMUSG00000087651.3	1500009L16Rik	chr10	83722865	83762762	HAVANA	+	protein_coding	NA	NA	NA	NA	NA	NA	NA	NA	NA	NA	NA	NA	NA	NA	NA	NA	NA	NA	-1.2572	NA	-1.91933	NA
Microglia-specific age-repressed	ENSMUSG00000035285.6	Nat14	chr7	4922028	4925006	HAVANA	+	protein_coding	NA	NA	NA	NA	NA	NA	NA	NA	NA	NA	NA	NA	NA	NA	NA	NA	NA	NA	-0.972284	NA	NA	NA
Microglia-specific age-repressed	ENSMUSG00000007989.6	Fzd3	chr14	65201026	65262463	HAVANA	-	protein_coding	NA	NA	NA	NA	NA	NA	NA	NA	NA	NA	NA	NA	NA	NA	NA	NA	NA	NA	-1.12699	NA	-1.39661	NA
Microglia-specific age-repressed	ENSMUSG00000020886.16	Dlg4	chr11	70017085	70045532	HAVANA	+	protein_coding	NA	NA	NA	NA	NA	NA	NA	NA	NA	NA	NA	NA	NA	NA	NA	NA	NA	NA	-0.975253	NA	-1.2139	NA
Microglia-specific age-repressed	ENSMUSG00000045136.6	Tubb2b	chr13	34126748	34130466	HAVANA	-	protein_coding	NA	NA	NA	NA	NA	NA	NA	NA	NA	NA	NA	NA	NA	NA	NA	NA	NA	NA	NA	-0.918578	NA	NA
Microglia-specific age-repressed	ENSMUSG00000045790.10	Ccdc149	chr5	52374651	52471521	HAVANA	-	protein_coding	NA	NA	NA	NA	NA	NA	NA	NA	NA	NA	NA	NA	NA	NA	NA	NA	NA	NA	NA	-2.11711	NA	NA
Microglia-specific age-repressed	ENSMUSG00000047501.3	Cldn4	chr5	134945119	134946934	HAVANA	-	protein_coding	NA	NA	NA	NA	NA	NA	NA	NA	NA	NA	NA	NA	NA	NA	NA	NA	NA	NA	NA	-1.33438	NA	NA
Microglia-specific age-repressed	ENSMUSG00000044807.13	Zfp354c	chr11	50811086	50827724	HAVANA	-	protein_coding	NA	NA	NA	NA	NA	NA	NA	NA	NA	NA	NA	NA	NA	NA	NA	NA	NA	NA	NA	-0.865615	-1.59469	NA
Microglia-specific age-repressed	ENSMUSG00000028246.13	Faxc	chr4	21931329	21996839	HAVANA	+	protein_coding	NA	NA	NA	NA	NA	NA	NA	NA	NA	NA	NA	NA	NA	NA	NA	NA	NA	NA	NA	-1.35129	NA	NA
Microglia-specific age-repressed	ENSMUSG00000052353.13	Cemip	chr7	83932857	84086502	HAVANA	-	protein_coding	NA	NA	NA	NA	NA	NA	NA	NA	NA	NA	NA	NA	NA	NA	NA	NA	NA	NA	NA	-0.86601	NA	NA
Microglia-specific age-repressed	ENSMUSG00000046169.9	Adamts6	chr13	104287873	104494763	ENSEMBL	+	protein_coding	NA	NA	NA	NA	NA	NA	NA	NA	NA	NA	NA	NA	NA	NA	NA	NA	NA	NA	NA	-1.19144	-1.32988	NA
Microglia-specific age-repressed	ENSMUSG00000090389.1	Cdv3-ps	chr14	43121772	43122101	ENSEMBL	-	processed_pseudogene	NA	NA	NA	NA	NA	NA	NA	NA	NA	NA	NA	NA	NA	NA	NA	NA	NA	NA	NA	5.27654	NA	NA
Microglia-specific age-repressed	ENSMUSG00000028701.4	Lurap1	chr4	116132406	116151338	HAVANA	-	protein_coding	NA	NA	NA	NA	NA	NA	NA	NA	NA	NA	NA	NA	NA	NA	NA	NA	NA	NA	NA	-0.871472	-1.34866	NA
Microglia-specific age-repressed	ENSMUSG00000016262.14	Sertad4	chr1	192844488	192855756	HAVANA	-	protein_coding	NA	NA	NA	NA	NA	NA	NA	NA	NA	NA	NA	NA	NA	NA	NA	NA	NA	NA	NA	-1.06033	-1.13193	NA
Microglia-specific age-repressed	ENSMUSG00000055407.14	Map6	chr7	99267447	99337137	HAVANA	+	protein_coding	NA	NA	NA	NA	NA	NA	NA	NA	NA	NA	NA	NA	NA	NA	NA	NA	NA	NA	NA	-0.848993	NA	NA
Microglia-specific age-repressed	ENSMUSG00000062846.7	Gm14176	chr2	157901536	157902012	HAVANA	+	processed_pseudogene	NA	NA	NA	NA	NA	NA	NA	NA	NA	NA	NA	NA	NA	NA	NA	NA	NA	NA	NA	-5.5585	NA	NA
Microglia-specific age-repressed	ENSMUSG00000018865.8	Sult4a1	chr15	84076097	84105754	ENSEMBL	-	protein_coding	NA	NA	NA	NA	NA	NA	NA	NA	NA	NA	NA	NA	NA	NA	NA	NA	NA	NA	NA	-1.24425	NA	NA
Microglia-specific age-induced	ENSMUSG00000063458.12	1700112E06Rik	chr14	22019712	23056085	HAVANA	+	protein_coding	3.61928	2.85131	3.89373	3.59945	3.8388	3.63067	3.63671	3.81611	4.03995	4.26818	4.3316	4.06708	3.18713	3.86154	4.53588	3.74162	3.76919	2.35223	4.447	4.0387	4.12056	4.14191
Microglia-specific age-induced	ENSMUSG00000050930.5	Map10	chr8	125669818	125673359	HAVANA	+	protein_coding	NA	-1.32395	NA	NA	NA	NA	NA	NA	NA	NA	NA	NA	NA	NA	NA	NA	NA	NA	NA	NA	NA	NA
Microglia-specific age-induced	ENSMUSG00000054626.11	Xlr	chrX	53777118	53797706	HAVANA	-	protein_coding	NA	NA	NA	NA	NA	NA	-3.52501	-1.92256	-3.43327	-2.43616	-3.23953	-2.79061	NA	NA	NA	NA	NA	NA	NA	NA	NA	NA
Microglia-specific age-induced	ENSMUSG00000028214.13	Gem	chr4	11704457	11714752	HAVANA	+	protein_coding	NA	NA	NA	NA	NA	NA	1.40984	1.24096	NA	NA	NA	1.09234	NA	NA	NA	NA	NA	NA	NA	NA	NA	NA
Microglia-specific age-induced	ENSMUSG00000050064.14	Zfp697	chr3	98382461	98753812	HAVANA	+	protein_coding	NA	NA	NA	NA	NA	NA	1.71487	2.01016	2.01779	NA	2.19905	NA	NA	NA	NA	NA	NA	NA	NA	NA	NA	NA
Microglia-specific age-induced	ENSMUSG00000025586.17	Cpeb1	chr7	81347026	81455465	HAVANA	-	protein_coding	NA	NA	NA	NA	NA	NA	NA	2.36777	NA	2.1368	2.15908	2.17411	NA	NA	NA	NA	NA	NA	0.985136	NA	0.874317	NA
Microglia-specific age-induced	ENSMUSG00000033022.7	Cdo1	chr18	46713205	46728342	ENSEMBL	-	protein_coding	NA	NA	NA	NA	NA	NA	NA	3.94954	NA	NA	NA	NA	NA	NA	NA	NA	NA	NA	1.33909	1.70919	1.6694	1.81328
Microglia-specific age-induced	ENSMUSG00000028527.18	Ak4	chr4	101419277	101466995	HAVANA	+	protein_coding	NA	NA	NA	NA	NA	NA	NA	3.49733	NA	1.9421	NA	3.76745	NA	NA	NA	NA	NA	NA	NA	1.00978	NA	NA
Microglia-specific age-induced	ENSMUSG00000039395.8	Mreg	chr1	72159442	72212307	HAVANA	-	protein_coding	NA	NA	NA	NA	NA	NA	NA	1.50223	-1.59593	NA	-1.32984	NA	NA	NA	NA	NA	NA	NA	1.23248	NA	1.50517	NA
Microglia-specific age-induced	ENSMUSG00000020399.14	Havcr2	chr11	46454935	46481255	HAVANA	+	protein_coding	NA	NA	NA	NA	NA	NA	NA	NA	NA	NA	NA	NA	1.49691	1.71792	1.5392	1.722	1.6183	1.95681	NA	NA	NA	NA
Microglia-specific age-induced	ENSMUSG00000020181.16	Nav3	chr10	109681259	110456204	HAVANA	-	protein_coding	NA	NA	NA	NA	NA	NA	NA	NA	NA	NA	NA	NA	-2.28237	NA	-2.23602	NA	-2.32298	-1.6262	NA	NA	NA	NA
Microglia-specific age-induced	ENSMUSG00000040809.10	Chil3	chr3	106147554	106167564	HAVANA	-	protein_coding	NA	NA	NA	NA	NA	NA	NA	NA	NA	NA	NA	NA	NA	4.08664	NA	5.57401	NA	4.03725	NA	NA	NA	NA
Microglia-specific age-induced	ENSMUSG00000043943.14	Naalad2	chr9	18321951	18402995	HAVANA	-	protein_coding	NA	NA	NA	NA	NA	NA	NA	NA	NA	NA	NA	NA	NA	NA	NA	NA	NA	NA	2.52708	2.44318	3.01556	2.33883
Microglia-specific age-induced	ENSMUSG00000103144.1	Pcdhga1	chr18	37661793	37841873	HAVANA	+	protein_coding	NA	NA	NA	NA	NA	NA	NA	NA	NA	NA	NA	NA	NA	NA	NA	NA	NA	NA	1.87747	1.46858	1.8341	1.28071
Microglia-specific age-induced	ENSMUSG00000028327.14	Stra6l	chr4	45848664	45887008	HAVANA	+	protein_coding	NA	NA	NA	NA	NA	NA	NA	NA	NA	NA	NA	NA	NA	NA	NA	NA	NA	NA	1.00476	1.08157	1.30221	1.30809
Microglia-specific age-induced	ENSMUSG00000015843.10	Rxrg	chr1	167598384	167639623	HAVANA	+	protein_coding	NA	NA	NA	NA	NA	NA	NA	NA	NA	NA	NA	NA	NA	NA	NA	NA	NA	NA	2.81889	2.36088	1.84527	2.10763
Microglia-specific age-induced	ENSMUSG00000026773.19	Pfkfb3	chr2	11471433	11554077	HAVANA	-	protein_coding	NA	NA	NA	NA	NA	NA	NA	NA	NA	NA	NA	NA	NA	NA	NA	NA	NA	NA	0.858041	NA	NA	NA
Microglia-specific age-induced	ENSMUSG00000106219.1	5830416I19Rik	chr5	64044978	64050228	HAVANA	+	lincRNA	NA	NA	NA	NA	NA	NA	NA	NA	NA	NA	NA	NA	NA	NA	NA	NA	NA	NA	2.46053	2.51871	3.65725	NA
Microglia-specific age-induced	ENSMUSG00000068129.5	Cst7	chr2	150570415	150578944	HAVANA	+	protein_coding	NA	NA	NA	NA	NA	NA	NA	NA	NA	NA	NA	NA	NA	NA	NA	NA	NA	NA	1.97933	2.27165	1.65766	1.72081
Microglia-specific age-induced	ENSMUSG00000107879.1	9330102E08Rik	chr6	128169704	128183803	HAVANA	-	lincRNA	NA	NA	NA	NA	NA	NA	NA	NA	NA	NA	NA	NA	NA	NA	NA	NA	NA	NA	1.54377	NA	NA	NA
Microglia-specific age-induced	ENSMUSG00000028362.2	Tnfsf8	chr4	63831308	63861347	HAVANA	-	protein_coding	NA	NA	NA	NA	NA	NA	NA	NA	NA	NA	NA	NA	NA	NA	NA	NA	NA	NA	4.28481	2.8815	2.68265	3.39339
Microglia-specific age-induced	ENSMUSG00000028518.8	Prkaa2	chr4	105029874	105109890	HAVANA	-	protein_coding	NA	NA	NA	NA	NA	NA	NA	NA	NA	NA	NA	NA	NA	NA	NA	NA	NA	NA	0.847791	0.948455	NA	NA
Microglia-specific age-induced	ENSMUSG00000103332.1	Pcdhga2	chr18	37668953	37841870	HAVANA	+	protein_coding	NA	NA	NA	NA	NA	NA	NA	NA	NA	NA	NA	NA	NA	NA	NA	NA	NA	NA	1.45764	1.3849	1.19273	2.05374
Microglia-specific age-induced	ENSMUSG00000097418.7	Mir155hg	chr16	84703167	84715245	HAVANA	+	lincRNA	NA	NA	NA	NA	NA	NA	NA	NA	NA	NA	NA	NA	NA	NA	NA	NA	NA	NA	1.47872	0.899246	NA	NA
Microglia-specific age-induced	ENSMUSG00000104000.1	Gm38335	chr3	10022311	10025539	HAVANA	-	lincRNA	NA	NA	NA	NA	NA	NA	NA	NA	NA	NA	NA	NA	NA	NA	NA	NA	NA	NA	1.66523	1.71254	2.92906	2.12162
Microglia-specific age-induced	ENSMUSG00000030577.14	Cd22	chr7	30865402	30880342	HAVANA	-	protein_coding	NA	NA	NA	NA	NA	NA	NA	NA	NA	NA	NA	NA	NA	NA	NA	NA	NA	NA	0.811347	NA	NA	NA
Microglia-specific age-induced	ENSMUSG00000030124.2	Lag3	chr6	124904361	124911705	HAVANA	-	protein_coding	NA	NA	NA	NA	NA	NA	NA	NA	NA	NA	NA	NA	NA	NA	NA	NA	NA	NA	1.51785	NA	1.50768	1.42708
Microglia-specific age-induced	ENSMUSG00000031497.9	Tnfsf13b	chr8	10006467	10039072	HAVANA	+	protein_coding	NA	NA	NA	NA	NA	NA	NA	NA	NA	NA	NA	NA	NA	NA	NA	NA	NA	NA	1.1512	1.08004	1.11183	1.21125
Microglia-specific age-induced	ENSMUSG00000010476.14	Ebf3	chr7	137193673	137314445	HAVANA	-	protein_coding	NA	NA	NA	NA	NA	NA	NA	NA	NA	NA	NA	NA	NA	NA	NA	NA	NA	NA	1.90992	NA	2.70705	NA
Microglia-specific age-induced	ENSMUSG00000097321.5	1700028E10Rik	chr5	151368675	151432118	HAVANA	+	processed_transcript	NA	NA	NA	NA	NA	NA	NA	NA	NA	NA	NA	NA	NA	NA	NA	NA	NA	NA	1.95202	NA	NA	NA
Microglia-specific age-induced	ENSMUSG00000026285.7	Pdcd1	chr1	94038305	94052553	HAVANA	-	protein_coding	NA	NA	NA	NA	NA	NA	NA	NA	NA	NA	NA	NA	NA	NA	NA	NA	NA	NA	3.63101	3.97602	3.1162	3.07456
Microglia-specific age-induced	ENSMUSG00000022441.17	Efcab6	chr15	83866712	84065379	HAVANA	-	protein_coding	NA	NA	NA	NA	NA	NA	NA	NA	NA	NA	NA	NA	NA	NA	NA	NA	NA	NA	2.37353	NA	2.05777	NA
Microglia-specific age-induced	ENSMUSG00000076441.9	Ass1	chr2	31470207	31520672	HAVANA	+	protein_coding	NA	NA	NA	NA	NA	NA	NA	NA	NA	NA	NA	NA	NA	NA	NA	NA	NA	NA	0.812745	NA	NA	NA
Microglia-specific age-induced	ENSMUSG00000114104.1	CT009757.7	chr13	63273600	63275911	HAVANA	+	TEC	NA	NA	NA	NA	NA	NA	NA	NA	NA	NA	NA	NA	NA	NA	NA	NA	NA	NA	1.40984	NA	NA	NA
Microglia-specific age-induced	ENSMUSG00000034390.16	Cmip	chr8	117257064	117459430	HAVANA	+	protein_coding	NA	NA	NA	NA	NA	NA	NA	NA	NA	NA	NA	NA	NA	NA	NA	NA	NA	NA	0.814792	NA	NA	NA
Microglia-specific age-induced	ENSMUSG00000106951.1	5930430L01Rik	chr5	148990056	148995223	HAVANA	-	lincRNA	NA	NA	NA	NA	NA	NA	NA	NA	NA	NA	NA	NA	NA	NA	NA	NA	NA	NA	1.097	NA	NA	NA
Microglia-specific age-induced	ENSMUSG00000097122.1	Gm26624	chr4	147136278	147457019	ENSEMBL	+	lincRNA	NA	NA	NA	NA	NA	NA	NA	NA	NA	NA	NA	NA	NA	NA	NA	NA	NA	NA	0.970684	NA	NA	NA
Microglia-specific age-induced	ENSMUSG00000056367.14	Actr3b	chr5	25759997	25850688	HAVANA	+	protein_coding	NA	NA	NA	NA	NA	NA	NA	NA	NA	NA	NA	NA	NA	NA	NA	NA	NA	NA	1.79684	1.68543	NA	NA
Microglia-specific age-induced	ENSMUSG00000104235.1	Gm37589	chr3	60535751	60539744	HAVANA	+	TEC	NA	NA	NA	NA	NA	NA	NA	NA	NA	NA	NA	NA	NA	NA	NA	NA	NA	NA	1.02099	NA	NA	NA
Microglia-specific age-induced	ENSMUSG00000021258.10	Ccnk	chr12	108179579	108203359	HAVANA	+	protein_coding	NA	NA	NA	NA	NA	NA	NA	NA	NA	NA	NA	NA	NA	NA	NA	NA	NA	NA	0.818196	NA	NA	NA
Microglia-specific age-induced	ENSMUSG00000097415.2	AU020206	chr7	75769038	75782099	HAVANA	-	lincRNA	NA	NA	NA	NA	NA	NA	NA	NA	NA	NA	NA	NA	NA	NA	NA	NA	NA	NA	0.831518	NA	NA	NA
Microglia-specific age-induced	ENSMUSG00000074867.4	Zfp808	chr13	62129886	62236144	HAVANA	+	protein_coding	NA	NA	NA	NA	NA	NA	NA	NA	NA	NA	NA	NA	NA	NA	NA	NA	NA	NA	0.913373	NA	NA	NA
Microglia-specific age-induced	ENSMUSG00000072812.4	Ahnak2	chr12	112772194	112802657	HAVANA	-	protein_coding	NA	NA	NA	NA	NA	NA	NA	NA	NA	NA	NA	NA	NA	NA	NA	NA	NA	NA	0.826559	NA	NA	NA
Microglia-specific age-induced	ENSMUSG00000044468.14	Fam46c	chr3	100451628	100489324	HAVANA	-	protein_coding	NA	NA	NA	NA	NA	NA	NA	NA	NA	NA	NA	NA	NA	NA	NA	NA	NA	NA	0.849594	NA	0.873923	NA
Microglia-specific age-induced	ENSMUSG00000086655.1	C330018A13Rik	chr5	116123614	116129110	HAVANA	+	antisense	NA	NA	NA	NA	NA	NA	NA	NA	NA	NA	NA	NA	NA	NA	NA	NA	NA	NA	1.68318	NA	1.51318	NA
Microglia-specific age-induced	ENSMUSG00000105434.1	Gm43359	chr5	122482800	122484999	HAVANA	-	TEC	NA	NA	NA	NA	NA	NA	NA	NA	NA	NA	NA	NA	NA	NA	NA	NA	NA	NA	1.03973	NA	1.04189	0.990984
Microglia-specific age-induced	ENSMUSG00000110185.1	Igip	chr18	36300101	36301517	HAVANA	+	protein_coding	NA	NA	NA	NA	NA	NA	NA	NA	NA	NA	NA	NA	NA	NA	NA	NA	NA	NA	1.09064	NA	NA	NA
Microglia-specific age-induced	ENSMUSG00000002028.13	Kmt2a	chr9	44803355	44881296	HAVANA	-	protein_coding	NA	NA	NA	NA	NA	NA	NA	NA	NA	NA	NA	NA	NA	NA	NA	NA	NA	NA	0.823678	NA	NA	NA
Microglia-specific age-induced	ENSMUSG00000026303.6	Mlph	chr1	90915085	90951142	HAVANA	+	protein_coding	NA	NA	NA	NA	NA	NA	NA	NA	NA	NA	NA	NA	NA	NA	NA	NA	NA	NA	1.06399	NA	NA	NA
Microglia-specific age-induced	ENSMUSG00000024002.16	Brd4	chr17	32196274	32284722	HAVANA	-	protein_coding	NA	NA	NA	NA	NA	NA	NA	NA	NA	NA	NA	NA	NA	NA	NA	NA	NA	NA	0.837177	NA	NA	NA
Microglia-specific age-induced	ENSMUSG00000086196.7	Gm13571	chr2	60338188	60371234	HAVANA	+	antisense	NA	NA	NA	NA	NA	NA	NA	NA	NA	NA	NA	NA	NA	NA	NA	NA	NA	NA	2.75209	NA	1.50174	NA
Microglia-specific age-induced	ENSMUSG00000108633.1	Gm44694	chr7	75707885	75709182	HAVANA	+	TEC	NA	NA	NA	NA	NA	NA	NA	NA	NA	NA	NA	NA	NA	NA	NA	NA	NA	NA	1.24536	NA	NA	NA
Microglia-specific age-induced	ENSMUSG00000030329.11	Pianp	chr6	124996694	125003096	HAVANA	+	protein_coding	NA	NA	NA	NA	NA	NA	NA	NA	NA	NA	NA	NA	NA	NA	NA	NA	NA	NA	1.49021	1.37263	1.74287	2.1461
Microglia-specific age-induced	ENSMUSG00000113842.1	AC122828.3	chr13	96556232	96559111	HAVANA	+	TEC	NA	NA	NA	NA	NA	NA	NA	NA	NA	NA	NA	NA	NA	NA	NA	NA	NA	NA	1.09174	NA	NA	NA
Microglia-specific age-induced	ENSMUSG00000024401.14	Tnf	chr17	35199381	35202007	HAVANA	-	protein_coding	NA	NA	NA	NA	NA	NA	NA	NA	NA	NA	NA	NA	NA	NA	NA	NA	NA	NA	0.849497	NA	NA	NA
Microglia-specific age-induced	ENSMUSG00000109498.1	Gm45222	chr7	90145948	90150254	HAVANA	+	TEC	NA	NA	NA	NA	NA	NA	NA	NA	NA	NA	NA	NA	NA	NA	NA	NA	NA	NA	0.91008	NA	NA	NA
Microglia-specific age-induced	ENSMUSG00000034342.9	Cbl	chr9	44142976	44234049	HAVANA	-	protein_coding	NA	NA	NA	NA	NA	NA	NA	NA	NA	NA	NA	NA	NA	NA	NA	NA	NA	NA	0.882999	NA	NA	NA
Microglia-specific age-induced	ENSMUSG00000047875.6	Gpr157	chr4	150087365	150105927	HAVANA	+	protein_coding	NA	NA	NA	NA	NA	NA	NA	NA	NA	NA	NA	NA	NA	NA	NA	NA	NA	NA	0.835636	NA	NA	NA
Microglia-specific age-induced	ENSMUSG00000064267.13	Hvcn1	chr5	122206804	122242297	HAVANA	+	protein_coding	NA	NA	NA	NA	NA	NA	NA	NA	NA	NA	NA	NA	NA	NA	NA	NA	NA	NA	0.804852	NA	NA	NA
Microglia-specific age-induced	ENSMUSG00000071714.5	Csf2rb2	chr15	78282517	78305603	ENSEMBL	-	protein_coding	NA	NA	NA	NA	NA	NA	NA	NA	NA	NA	NA	NA	NA	NA	NA	NA	NA	NA	0.913494	NA	NA	NA
Microglia-specific age-induced	ENSMUSG00000025069.14	Gsto2	chr19	47865545	47886324	HAVANA	+	protein_coding	NA	NA	NA	NA	NA	NA	NA	NA	NA	NA	NA	NA	NA	NA	NA	NA	NA	NA	1.51895	NA	2.56313	NA
Microglia-specific age-induced	ENSMUSG00000019301.5	Hsd17b1	chr11	101078411	101080527	HAVANA	+	protein_coding	NA	NA	NA	NA	NA	NA	NA	NA	NA	NA	NA	NA	NA	NA	NA	NA	NA	NA	1.36494	NA	NA	NA
Microglia-specific age-induced	ENSMUSG00000048806.4	Ifnb1	chr4	88522025	88522774	HAVANA	-	protein_coding	NA	NA	NA	NA	NA	NA	NA	NA	NA	NA	NA	NA	NA	NA	NA	NA	NA	NA	5.12614	NA	NA	NA
Microglia-specific age-induced	ENSMUSG00000024334.8	H2-Oa	chr17	34092340	34095234	HAVANA	+	protein_coding	NA	NA	NA	NA	NA	NA	NA	NA	NA	NA	NA	NA	NA	NA	NA	NA	NA	NA	1.54605	NA	NA	NA
Microglia-specific age-induced	ENSMUSG00000022283.14	Pabpc1	chr15	36595661	36608973	HAVANA	-	protein_coding	NA	NA	NA	NA	NA	NA	NA	NA	NA	NA	NA	NA	NA	NA	NA	NA	NA	NA	0.817575	NA	NA	NA
Microglia-specific age-induced	ENSMUSG00000007817.14	Zmiz1	chr14	25459185	25666743	HAVANA	+	protein_coding	NA	NA	NA	NA	NA	NA	NA	NA	NA	NA	NA	NA	NA	NA	NA	NA	NA	NA	1.05224	NA	NA	NA
Microglia-specific age-induced	ENSMUSG00000029699.13	Ssc4d	chr5	135960211	135974531	HAVANA	-	protein_coding	NA	NA	NA	NA	NA	NA	NA	NA	NA	NA	NA	NA	NA	NA	NA	NA	NA	NA	0.824543	NA	NA	NA
Microglia-specific age-induced	ENSMUSG00000082419.3	Gm11425	chr11	83027500	83027997	HAVANA	-	processed_pseudogene	NA	NA	NA	NA	NA	NA	NA	NA	NA	NA	NA	NA	NA	NA	NA	NA	NA	NA	0.827945	NA	NA	NA
Microglia-specific age-induced	ENSMUSG00000030532.6	Hddc3	chr7	80343104	80350547	HAVANA	+	protein_coding	NA	NA	NA	NA	NA	NA	NA	NA	NA	NA	NA	NA	NA	NA	NA	NA	NA	NA	0.87735	NA	0.985028	NA
Microglia-specific age-induced	ENSMUSG00000112756.1	AC125487.2	chr12	95724956	95726255	HAVANA	+	TEC	NA	NA	NA	NA	NA	NA	NA	NA	NA	NA	NA	NA	NA	NA	NA	NA	NA	NA	1.31989	NA	NA	NA
Microglia-specific age-induced	ENSMUSG00000054509.7	Parp4	chr14	56575619	56659794	HAVANA	+	protein_coding	NA	NA	NA	NA	NA	NA	NA	NA	NA	NA	NA	NA	NA	NA	NA	NA	NA	NA	1.04074	NA	NA	NA
Microglia-specific age-induced	ENSMUSG00000054945.3	Gm9958	chr5	90367204	90368487	ENSEMBL	+	protein_coding	NA	NA	NA	NA	NA	NA	NA	NA	NA	NA	NA	NA	NA	NA	NA	NA	NA	NA	0.819099	NA	NA	NA
Microglia-specific age-induced	ENSMUSG00000074529.10	Zfp972	chr2	177903340	177925613	HAVANA	-	protein_coding	NA	NA	NA	NA	NA	NA	NA	NA	NA	NA	NA	NA	NA	NA	NA	NA	NA	NA	2.74988	NA	NA	NA
Microglia-specific age-induced	ENSMUSG00000102780.1	Gm38253	chr3	106725599	106730276	HAVANA	+	TEC	NA	NA	NA	NA	NA	NA	NA	NA	NA	NA	NA	NA	NA	NA	NA	NA	NA	NA	1.02688	NA	NA	NA
Microglia-specific age-induced	ENSMUSG00000090300.1	Gm17119	chr3	14564402	14564681	HAVANA	+	transcribed_processed_pseudogene	NA	NA	NA	NA	NA	NA	NA	NA	NA	NA	NA	NA	NA	NA	NA	NA	NA	NA	3.33284	NA	NA	NA
Microglia-specific age-induced	ENSMUSG00000013367.5	Iglon5	chr7	43472904	43490075	HAVANA	-	protein_coding	NA	NA	NA	NA	NA	NA	NA	NA	NA	NA	NA	NA	NA	NA	NA	NA	NA	NA	0.994984	NA	1.10465	NA
Microglia-specific age-induced	ENSMUSG00000099032.2	Tcf24	chr1	9960163	9967932	HAVANA	-	protein_coding	NA	NA	NA	NA	NA	NA	NA	NA	NA	NA	NA	NA	NA	NA	NA	NA	NA	NA	0.888059	NA	NA	NA
Microglia-specific age-induced	ENSMUSG00000005198.15	Polr2a	chr11	69733997	69758637	HAVANA	-	protein_coding	NA	NA	NA	NA	NA	NA	NA	NA	NA	NA	NA	NA	NA	NA	NA	NA	NA	NA	1.82862	NA	NA	NA
Microglia-specific age-induced	ENSMUSG00000052920.14	Prkg1	chr19	30567551	31765033	HAVANA	-	protein_coding	NA	NA	NA	NA	NA	NA	NA	NA	NA	NA	NA	NA	NA	NA	NA	NA	NA	NA	1.0728	1.31204	1.3823	NA
Microglia-specific age-induced	ENSMUSG00000060402.7	Chst8	chr7	34674468	34812711	HAVANA	-	protein_coding	NA	NA	NA	NA	NA	NA	NA	NA	NA	NA	NA	NA	NA	NA	NA	NA	NA	NA	1.20043	NA	1.66136	1.49139
Microglia-specific age-induced	ENSMUSG00000109015.1	Gm45010	chr7	28167275	28169627	HAVANA	-	TEC	NA	NA	NA	NA	NA	NA	NA	NA	NA	NA	NA	NA	NA	NA	NA	NA	NA	NA	0.87301	NA	NA	NA
Microglia-specific age-induced	ENSMUSG00000106133.1	Gm3724	chr5	24118316	24118664	HAVANA	-	processed_pseudogene	NA	NA	NA	NA	NA	NA	NA	NA	NA	NA	NA	NA	NA	NA	NA	NA	NA	NA	4.45239	NA	NA	NA
Microglia-specific age-induced	ENSMUSG00000035121.5	Neil2	chr14	63182443	63193541	ENSEMBL	-	protein_coding	NA	NA	NA	NA	NA	NA	NA	NA	NA	NA	NA	NA	NA	NA	NA	NA	NA	NA	1.07342	NA	NA	NA
Microglia-specific age-induced	ENSMUSG00000108137.1	Gm44053	chr6	113725223	113726151	HAVANA	+	lincRNA	NA	NA	NA	NA	NA	NA	NA	NA	NA	NA	NA	NA	NA	NA	NA	NA	NA	NA	0.915749	NA	NA	NA
Microglia-specific age-induced	ENSMUSG00000015396.4	Cd83	chr13	43784775	43803132	HAVANA	+	protein_coding	NA	NA	NA	NA	NA	NA	NA	NA	NA	NA	NA	NA	NA	NA	NA	NA	NA	NA	0.947609	NA	NA	NA
Microglia-specific age-induced	ENSMUSG00000103220.1	Gm37728	chr6	31145128	31147419	HAVANA	-	TEC	NA	NA	NA	NA	NA	NA	NA	NA	NA	NA	NA	NA	NA	NA	NA	NA	NA	NA	1.17036	NA	NA	NA
Microglia-specific age-induced	ENSMUSG00000086109.2	Gm13391	chr2	6472000	6478619	HAVANA	+	lincRNA	NA	NA	NA	NA	NA	NA	NA	NA	NA	NA	NA	NA	NA	NA	NA	NA	NA	NA	0.993562	NA	1.34607	NA
Microglia-specific age-induced	ENSMUSG00000027221.5	Chst1	chr2	92599707	92615250	HAVANA	+	protein_coding	NA	NA	NA	NA	NA	NA	NA	NA	NA	NA	NA	NA	NA	NA	NA	NA	NA	NA	0.812127	NA	NA	NA
Microglia-specific age-induced	ENSMUSG00000106341.1	Gm43330	chr3	105782875	105785027	HAVANA	-	sense_intronic	NA	NA	NA	NA	NA	NA	NA	NA	NA	NA	NA	NA	NA	NA	NA	NA	NA	NA	1.0571	NA	NA	NA
Microglia-specific age-induced	ENSMUSG00000043487.4	Acot6	chr12	84100654	84111349	HAVANA	+	protein_coding	NA	NA	NA	NA	NA	NA	NA	NA	NA	NA	NA	NA	NA	NA	NA	NA	NA	NA	0.991159	NA	1.27555	NA
Microglia-specific age-induced	ENSMUSG00000096935.5	1700113A16Rik	chr3	88171556	88177785	HAVANA	-	antisense	NA	NA	NA	NA	NA	NA	NA	NA	NA	NA	NA	NA	NA	NA	NA	NA	NA	NA	1.3947	NA	NA	NA
Microglia-specific age-induced	ENSMUSG00000048047.3	Zbtb33	chrX	38189793	38197046	HAVANA	+	protein_coding	NA	NA	NA	NA	NA	NA	NA	NA	NA	NA	NA	NA	NA	NA	NA	NA	NA	NA	0.822416	NA	NA	NA
Microglia-specific age-induced	ENSMUSG00000039852.17	Rere	chr4	150281646	150621966	HAVANA	+	protein_coding	NA	NA	NA	NA	NA	NA	NA	NA	NA	NA	NA	NA	NA	NA	NA	NA	NA	NA	0.89623	NA	NA	NA
Microglia-specific age-induced	ENSMUSG00000103804.1	Gm37062	chr1	38076295	38077305	HAVANA	-	sense_intronic	NA	NA	NA	NA	NA	NA	NA	NA	NA	NA	NA	NA	NA	NA	NA	NA	NA	NA	1.67003	NA	NA	NA
Microglia-specific age-induced	ENSMUSG00000073538.10	E330020D12Rik	chr1	153404827	153414233	HAVANA	-	processed_transcript	NA	NA	NA	NA	NA	NA	NA	NA	NA	NA	NA	NA	NA	NA	NA	NA	NA	NA	1.65659	NA	2.1871	NA
Microglia-specific age-induced	ENSMUSG00000043953.12	Ccrl2	chr9	111054486	111057519	HAVANA	-	protein_coding	NA	NA	NA	NA	NA	NA	NA	NA	NA	NA	NA	NA	NA	NA	NA	NA	NA	NA	1.29319	NA	NA	NA
Microglia-specific age-induced	ENSMUSG00000056215.12	Lrguk	chr6	34029448	34134034	HAVANA	+	protein_coding	NA	NA	NA	NA	NA	NA	NA	NA	NA	NA	NA	NA	NA	NA	NA	NA	NA	NA	NA	1.27984	NA	NA
Microglia-specific age-induced	ENSMUSG00000000365.8	Rnf17	chr14	56402697	56525032	ENSEMBL	+	protein_coding	NA	NA	NA	NA	NA	NA	NA	NA	NA	NA	NA	NA	NA	NA	NA	NA	NA	NA	NA	0.911543	0.916674	0.927191
Microglia-specific age-induced	ENSMUSG00000032911.6	Cspg4	chr9	56865033	56899870	HAVANA	+	protein_coding	NA	NA	NA	NA	NA	NA	NA	NA	NA	NA	NA	NA	NA	NA	NA	NA	NA	NA	NA	0.914769	NA	0.984645
Microglia-specific age-induced	ENSMUSG00000026779.6	Mastl	chr2	23115606	23156024	HAVANA	-	protein_coding	NA	NA	NA	NA	NA	NA	NA	NA	NA	NA	NA	NA	NA	NA	NA	NA	NA	NA	NA	-0.907389	-1.17522	NA
Microglia-specific age-induced	ENSMUSG00000084940.2	Gm15935	chr14	21741543	21746632	HAVANA	+	antisense	NA	NA	NA	NA	NA	NA	NA	NA	NA	NA	NA	NA	NA	NA	NA	NA	NA	NA	NA	1.30567	NA	NA
Kupffer-specific age-induced	ENSMUSG00000090015.8	Gm15446	chr5	109923400	109943936	HAVANA	+	protein_coding	4.80068	4.74279	3.97236	3.9699	4.52336	4.54232	3.28826	3.80987	3.77105	2.83454	3.51578	2.26139	4.35616	4.18827	4.40741	3.91537	4.46089	5.00807	4.85191	5.05336	4.64587	4.71027
Kupffer-specific age-induced	ENSMUSG00000076609.2	Igkc	chr6	70726435	70726966	HAVANA	+	IG_C_gene	10.4848	12.7954	NA	8.56448	NA	7.67381	NA	NA	NA	NA	NA	NA	NA	NA	NA	5.91584	NA	NA	NA	4.13956	3.84453	3.84213
Kupffer-specific age-induced	ENSMUSG00000079457.9	Gm7609	chr1	85199613	85213786	HAVANA	+	transcribed_unprocessed_pseudogene	4.17652	2.79899	3.65265	4.03668	3.09896	3.6561	2.8578	NA	NA	NA	NA	NA	NA	NA	1.71722	NA	NA	NA	3.18291	2.62533	2.47117	2.94723
Kupffer-specific age-induced	ENSMUSG00000104452.1	Ighv8-8	chr12	115294062	115294504	HAVANA	-	IG_V_gene	NA	7.6202	NA	8.42277	NA	8.8107	NA	NA	NA	NA	NA	NA	NA	NA	NA	NA	NA	NA	NA	NA	NA	NA
Kupffer-specific age-induced	ENSMUSG00000095079.6	Igha	chr12	113254830	113260236	HAVANA	-	IG_C_gene	NA	8.92704	NA	9.77104	NA	NA	NA	NA	NA	NA	NA	NA	NA	NA	NA	NA	NA	NA	NA	NA	NA	NA
Kupffer-specific age-induced	ENSMUSG00000067149.6	Jchain	chr5	88519809	88527891	HAVANA	-	protein_coding	NA	4.45316	NA	9.542	NA	4.71122	NA	NA	NA	NA	NA	NA	NA	NA	NA	NA	NA	6.05377	NA	NA	NA	NA
Kupffer-specific age-induced	ENSMUSG00000076612.8	Ighg2c	chr12	113285325	113288932	HAVANA	-	IG_C_gene	NA	8.49823	NA	8.66005	NA	NA	NA	NA	NA	NA	NA	NA	NA	7.97339	NA	6.40397	NA	6.69971	NA	NA	NA	NA
Kupffer-specific age-induced	ENSMUSG00000062783.2	Csprs	GL456221.1	111572	163011	ENSEMBL	-	protein_coding	NA	2.41949	2.89779	4.03843	3.20747	3.84967	NA	NA	NA	NA	NA	NA	1.51678	NA	1.99289	1.6262	1.90238	1.50897	3.173	2.28216	2.00856	3.1113
Kupffer-specific age-induced	ENSMUSG00000095771.2	Igkv14-111	chr6	68256389	68256869	HAVANA	+	IG_V_gene	NA	6.27331	NA	NA	NA	6.46575	NA	NA	NA	NA	NA	NA	NA	NA	NA	NA	NA	NA	NA	NA	NA	NA
Kupffer-specific age-induced	ENSMUSG00000029372.7	Ppbp	chr5	90768518	90770063	HAVANA	+	protein_coding	NA	2.28252	NA	2.57585	NA	NA	NA	NA	NA	NA	-1.60786	NA	NA	NA	NA	NA	NA	NA	-2.25164	NA	-2.32303	NA
Kupffer-specific age-induced	ENSMUSG00000097111.1	Peak1os	chr9	56257890	56267780	HAVANA	+	antisense	NA	2.39219	NA	2.18283	NA	NA	NA	NA	NA	NA	NA	NA	NA	NA	NA	NA	NA	NA	NA	NA	NA	NA
Kupffer-specific age-induced	ENSMUSG00000076934.2	Iglv1	chr16	19085017	19085500	HAVANA	-	IG_V_gene	NA	6.21957	NA	NA	NA	NA	NA	NA	NA	NA	NA	NA	NA	NA	NA	NA	NA	NA	NA	NA	NA	NA
Kupffer-specific age-induced	ENSMUSG00000093894.1	Ighv1-53	chr12	115158403	115158835	HAVANA	-	IG_V_gene	NA	8.59283	NA	NA	NA	8.84084	NA	NA	NA	NA	NA	NA	8.5516	NA	NA	8.93666	NA	NA	NA	NA	NA	NA
Kupffer-specific age-induced	ENSMUSG00000094420.2	Igkv10-96	chr6	68631963	68632442	HAVANA	-	IG_V_gene	NA	9.66164	NA	10.0652	NA	9.72758	NA	NA	NA	NA	NA	NA	NA	6.27039	NA	NA	NA	NA	NA	NA	NA	NA
Kupffer-specific age-induced	ENSMUSG00000021211.4	Akr1c12	chr13	4268176	4279433	HAVANA	-	protein_coding	NA	NA	NA	NA	NA	NA	1.76635	2.03544	1.75063	1.57271	1.66702	1.48695	NA	NA	NA	NA	NA	NA	NA	NA	NA	NA
Kupffer-specific age-induced	ENSMUSG00000024610.14	Cd74	chr18	60803848	60812646	ENSEMBL	+	protein_coding	NA	NA	NA	NA	NA	NA	1.58613	2.31421	1.26051	2.37525	1.20274	2.07394	NA	NA	NA	NA	NA	NA	NA	0.865363	0.882358	0.901731
Kupffer-specific age-induced	ENSMUSG00000072109.11	A530040E14Rik	chr1	85105946	85114035	HAVANA	+	antisense	NA	NA	NA	NA	NA	NA	2.46344	1.88732	NA	NA	1.71202	NA	NA	NA	NA	NA	NA	NA	NA	NA	NA	1.66328
Kupffer-specific age-induced	ENSMUSG00000036594.14	H2-Aa	chr17	34282744	34287827	HAVANA	-	protein_coding	NA	NA	NA	NA	NA	NA	1.46753	3.1282	1.24115	2.70816	1.54992	2.72145	NA	NA	NA	NA	NA	NA	NA	NA	NA	NA
Kupffer-specific age-induced	ENSMUSG00000066677.12	Ifi208	chr1	173673675	173698395	HAVANA	+	protein_coding	NA	NA	6.08723	5.66648	7.96344	8.30633	6.91763	7.6989	5.70259	6.25687	6.94874	NA	NA	NA	4.9436	5.27741	8.02113	7.06038	6.1196	NA	5.91448	6.42782
Kupffer-specific age-induced	ENSMUSG00000096108.2	Ighv11-2	chr12	114048241	114048812	HAVANA	-	IG_V_gene	NA	NA	NA	NA	NA	NA	4.28939	NA	4.50363	NA	4.16462	NA	NA	NA	NA	NA	NA	NA	NA	NA	NA	NA
Kupffer-specific age-induced	ENSMUSG00000060586.10	H2-Eb1	chr17	34305877	34316199	HAVANA	+	protein_coding	NA	NA	NA	NA	NA	NA	NA	3.39388	NA	2.40236	1.3664	1.61709	NA	NA	NA	NA	NA	NA	NA	NA	NA	NA
Kupffer-specific age-induced	ENSMUSG00000073421.5	H2-Ab1	chr17	34263209	34269418	HAVANA	+	protein_coding	NA	NA	NA	NA	NA	NA	NA	1.83208	NA	1.46925	NA	NA	NA	NA	NA	NA	NA	NA	NA	NA	NA	NA
Kupffer-specific age-induced	ENSMUSG00000079192.2	AC125149.1	GL456210.1	123792	124928	ENSEMBL	+	protein_coding	NA	NA	NA	NA	NA	NA	NA	8.05269	NA	NA	NA	NA	3.39053	3.69167	3.04744	2.91559	3.02418	8.7227	NA	NA	NA	NA
Kupffer-specific age-induced	ENSMUSG00000044206.3	Vsig4	chrX	96247203	96293438	HAVANA	-	protein_coding	NA	NA	NA	NA	NA	NA	NA	1.13499	NA	NA	NA	1.60002	NA	NA	NA	NA	NA	NA	NA	NA	NA	NA
Kupffer-specific age-induced	ENSMUSG00000037820.15	Tgm2	chr2	158116402	158146436	HAVANA	-	protein_coding	NA	NA	NA	NA	NA	NA	NA	1.2706	NA	NA	NA	NA	NA	NA	NA	NA	NA	NA	NA	NA	NA	NA
Kupffer-specific age-induced	ENSMUSG00000076617.9	Ighm	chr12	113418558	113422730	HAVANA	-	IG_C_gene	NA	NA	NA	NA	4.22084	4.94755	NA	2.65577	NA	NA	2.93582	NA	NA	NA	NA	NA	NA	NA	1.25998	1.37203	2.02503	2.51976
Kupffer-specific age-induced	ENSMUSG00000056999.14	Ide	chr19	37268743	37337852	HAVANA	-	protein_coding	NA	NA	NA	NA	NA	NA	NA	NA	NA	NA	NA	NA	0.99319	1.0294	0.962134	0.998428	1.06445	0.955272	0.967164	0.951182	NA	NA
Kupffer-specific age-induced	ENSMUSG00000034783.7	Cd207	chr6	83671215	83677857	HAVANA	-	protein_coding	NA	NA	NA	NA	NA	NA	NA	NA	NA	NA	NA	NA	2.24377	2.86679	2.45135	3.66175	NA	2.21974	NA	NA	NA	NA
Kupffer-specific age-induced	ENSMUSG00000091199.9	Gm2619	chr1	85156809	85327306	HAVANA	-	transcribed_unprocessed_pseudogene	NA	NA	NA	NA	NA	NA	NA	NA	NA	NA	NA	NA	2.38072	NA	2.3965	2.28294	2.70045	2.75741	NA	NA	NA	NA
Kupffer-specific age-induced	ENSMUSG00000076564.2	Igkv12-46	chr6	69764523	69765022	HAVANA	-	IG_V_gene	NA	NA	NA	NA	NA	NA	NA	NA	NA	NA	NA	NA	7.75561	8.04241	7.77956	8.23754	NA	NA	NA	NA	NA	NA
Kupffer-specific age-induced	ENSMUSG00000061852.8	Gm7582	chr1	85027954	85041958	HAVANA	-	unprocessed_pseudogene	NA	NA	NA	NA	NA	NA	NA	NA	NA	NA	NA	NA	1.98305	3.0071	1.57879	1.99208	2.16837	1.51036	NA	NA	NA	NA
Kupffer-specific age-induced	ENSMUSG00000094335.2	Igkv1-117	chr6	68121046	68121827	HAVANA	+	IG_V_gene	NA	NA	NA	NA	NA	NA	NA	NA	NA	NA	NA	NA	NA	6.52275	NA	6.77834	NA	7.99476	NA	NA	NA	NA
Kupffer-specific age-induced	ENSMUSG00000094694.6	Ighv1-9	chr12	114583569	114584002	HAVANA	-	IG_V_gene	NA	NA	NA	NA	NA	NA	NA	NA	NA	NA	NA	NA	NA	5.58438	NA	5.28191	NA	4.66905	NA	NA	NA	NA
Kupffer-specific age-induced	ENSMUSG00000094006.2	Igkv4-59	chr6	69438218	69438757	HAVANA	-	IG_V_gene	NA	NA	NA	NA	NA	NA	NA	NA	NA	NA	NA	NA	NA	7.33691	NA	7.64749	NA	5.64072	NA	NA	NA	NA
Kupffer-specific age-induced	ENSMUSG00000094561.1	Ighv1-22	chr12	114746273	114746706	HAVANA	-	IG_V_gene	NA	NA	NA	NA	NA	NA	NA	NA	NA	NA	NA	NA	NA	6.50127	NA	NA	NA	NA	NA	NA	NA	NA
Kupffer-specific age-induced	ENSMUSG00000076695.7	Ighv1-18	chr12	114682632	114683065	HAVANA	-	IG_V_gene	NA	NA	NA	NA	NA	NA	NA	NA	NA	NA	NA	NA	NA	8.90599	NA	9.06144	NA	6.96739	NA	NA	NA	NA
Kupffer-specific age-induced	ENSMUSG00000105906.1	Iglc1	chr16	19061618	19062071	HAVANA	-	IG_C_gene	NA	NA	NA	NA	NA	NA	NA	NA	NA	NA	NA	NA	NA	6.35053	NA	NA	NA	NA	NA	NA	NA	NA
Kupffer-specific age-induced	ENSMUSG00000096410.2	Ighv1-19	chr12	114708648	114709135	HAVANA	-	IG_V_gene	NA	NA	NA	NA	NA	NA	NA	NA	NA	NA	NA	NA	NA	4.08531	NA	3.76066	NA	6.271	NA	NA	NA	NA
Kupffer-specific age-induced	ENSMUSG00000042385.14	Gzmk	chr13	113171608	113225908	HAVANA	-	protein_coding	NA	NA	NA	NA	NA	NA	NA	NA	NA	NA	NA	NA	NA	6.17087	NA	5.05059	NA	5.18176	NA	NA	NA	NA
Kupffer-specific age-induced	ENSMUSG00000076522.2	Igkv16-104	chr6	68425575	68426072	HAVANA	+	IG_V_gene	NA	NA	NA	NA	NA	NA	NA	NA	NA	NA	NA	NA	NA	4.90512	NA	NA	NA	6.57885	NA	NA	NA	NA
Kupffer-specific age-induced	ENSMUSG00000095335.2	Igkv3-5	chr6	70663275	70663895	HAVANA	+	IG_V_gene	NA	NA	NA	NA	NA	NA	NA	NA	NA	NA	NA	NA	NA	7.12993	NA	NA	NA	5.16026	NA	NA	NA	NA
Kupffer-specific age-induced	ENSMUSG00000002944.15	Cd36	chr5	17781690	17888801	HAVANA	-	protein_coding	NA	NA	NA	NA	NA	NA	NA	NA	NA	NA	NA	NA	NA	NA	NA	NA	NA	NA	1.29945	NA	1.38939	NA
Kupffer-specific age-induced	ENSMUSG00000066877.11	Nck2	chr1	43444579	43570515	HAVANA	+	protein_coding	NA	NA	NA	NA	NA	NA	NA	NA	NA	NA	NA	NA	NA	NA	NA	NA	NA	NA	-1.26078	NA	NA	NA
Kupffer-specific age-induced	ENSMUSG00000058073.4	Gm11189	chr11	53200684	53201058	HAVANA	+	processed_pseudogene	NA	NA	NA	NA	NA	NA	NA	NA	NA	NA	NA	NA	NA	NA	NA	NA	NA	NA	5.02828	NA	NA	NA
Kupffer-specific age-induced	ENSMUSG00000034800.15	Zfp661	chr2	127574662	127587094	HAVANA	-	protein_coding	NA	NA	NA	NA	NA	NA	NA	NA	NA	NA	NA	NA	NA	NA	NA	NA	NA	NA	0.885374	NA	NA	NA
Kupffer-specific age-induced	ENSMUSG00000094114.1	Gm21967	chr13	119606650	119610458	ENSEMBL	+	protein_coding	NA	NA	NA	NA	NA	NA	NA	NA	NA	NA	NA	NA	NA	NA	NA	NA	NA	NA	1.72683	NA	NA	NA
Kupffer-specific age-induced	ENSMUSG00000055976.6	Cldn23	chr8	35824712	35826559	HAVANA	-	protein_coding	NA	NA	NA	NA	NA	NA	NA	NA	NA	NA	NA	NA	NA	NA	NA	NA	NA	NA	2.10889	NA	NA	NA
Kupffer-specific age-induced	ENSMUSG00000107928.1	Gm45140	chr6	87788861	87835795	HAVANA	-	protein_coding	NA	NA	NA	NA	NA	NA	NA	NA	NA	NA	NA	NA	NA	NA	NA	NA	NA	NA	NA	2.47822	1.43721	NA
Kupffer-specific age-induced	ENSMUSG00000040584.8	Abcb1a	chr5	8660077	8748575	HAVANA	+	protein_coding	NA	NA	NA	NA	NA	NA	NA	NA	NA	NA	NA	NA	NA	NA	NA	NA	NA	NA	NA	1.10218	NA	1.36194
Kupffer/Microglia age-repressed	ENSMUSG00000096780.7	Tmem181b-ps	chr17	6438524	6467022	HAVANA	-	transcribed_unprocessed_pseudogene	-1.56931	-1.33639	-1.0858	-1.27477	-1.18239	-1.06626	-1.18882	-1.05616	-1.21593	-1.30019	-1.3813	-1.25638	-1.52375	-1.3134	-1.39661	-1.51242	-1.09895	-1.2447	-1.26943	-1.29737	-1.04489	-1.28522
Kupffer/Microglia age-repressed	ENSMUSG00000105263.1	Gm42427	chr5	44137980	44143271	HAVANA	+	TEC	-2.27585	-2.36052	-2.11648	-2.02455	-2.78247	NA	-2.4866	-2.52758	-2.91488	-2.38278	-2.17492	NA	NA	NA	NA	NA	NA	NA	NA	NA	NA	NA
Kupffer/Microglia age-repressed	ENSMUSG00000032184.5	Lysmd2	chr9	75625741	75637771	HAVANA	+	protein_coding	NA	3.37944	NA	NA	NA	NA	NA	NA	NA	NA	NA	NA	NA	NA	NA	NA	NA	NA	NA	NA	NA	NA
Kupffer/Microglia age-repressed	ENSMUSG00000027799.12	Nbea	chr3	55625195	56183701	HAVANA	-	protein_coding	NA	NA	NA	NA	NA	NA	-2.78384	-1.19728	-2.51433	-1.54611	-2.87854	-1.47607	NA	-0.903161	NA	NA	NA	NA	NA	NA	-0.866266	NA
Kupffer/Microglia age-repressed	ENSMUSG00000063171.4	Rps4l	chr6	148354656	148355598	HAVANA	+	transcribed_processed_pseudogene	NA	NA	NA	NA	NA	NA	-1.53476	-2.47604	-1.77215	-2.39286	-1.76741	-2.21727	NA	NA	NA	-1.39448	-1.29731	-1.33028	NA	NA	0.814198	NA
Kupffer/Microglia age-repressed	ENSMUSG00000019478.16	Rab4a	chr8	123805985	123835287	HAVANA	+	protein_coding	NA	NA	NA	NA	-3.1696	NA	-3.36078	-2.57991	NA	NA	NA	NA	NA	-1.99896	NA	NA	NA	NA	-1.69795	-1.49964	-1.55152	-1.10967
Kupffer/Microglia age-repressed	ENSMUSG00000037762.6	Slc16a9	chr10	70245100	70285968	HAVANA	+	protein_coding	NA	NA	NA	NA	NA	NA	NA	2.01321	1.08936	2.02853	NA	NA	NA	NA	NA	NA	NA	NA	-1.52888	-1.11834	-1.8184	-1.22265
Kupffer/Microglia age-repressed	ENSMUSG00000042814.7	Mcts2	chr2	152687035	152687951	HAVANA	+	protein_coding	NA	NA	NA	NA	NA	NA	NA	-1.73071	NA	NA	NA	NA	NA	NA	NA	NA	NA	NA	NA	NA	NA	NA
Kupffer/Microglia age-repressed	ENSMUSG00000112690.1	AC174776.1	chr12	55217176	55226072	HAVANA	-	unprocessed_pseudogene	NA	NA	NA	NA	NA	NA	NA	7.85331	NA	NA	NA	NA	NA	NA	NA	NA	NA	NA	NA	NA	NA	NA
Kupffer/Microglia age-repressed	ENSMUSG00000022146.12	Osmr	chr15	6813577	6874969	HAVANA	-	protein_coding	NA	NA	NA	NA	NA	NA	NA	2.22577	NA	NA	NA	NA	NA	NA	NA	NA	NA	NA	-1.1559	NA	-1.04077	NA
Kupffer/Microglia age-repressed	ENSMUSG00000058056.16	Palld	chr8	61511433	61902690	HAVANA	-	protein_coding	NA	NA	NA	NA	NA	NA	NA	-1.48427	NA	NA	NA	NA	NA	NA	NA	NA	NA	NA	NA	NA	NA	NA
Kupffer/Microglia age-repressed	ENSMUSG00000040473.15	Cfap69	chr5	5579278	5664239	HAVANA	-	protein_coding	NA	NA	NA	NA	NA	NA	NA	NA	NA	NA	NA	NA	-4.79052	-2.97052	-4.22588	-4.01362	-3.66898	-4.41322	-1.52121	-1.08751	-1.77599	-1.01258
Kupffer/Microglia age-repressed	ENSMUSG00000015653.13	Steap2	chr5	5664829	5694578	HAVANA	-	protein_coding	NA	NA	NA	NA	NA	NA	NA	NA	NA	NA	NA	NA	-3.71253	-3.3127	-3.56375	-3.68237	-2.77185	-3.47001	-1.04831	NA	-1.19582	NA
Kupffer/Microglia age-repressed	ENSMUSG00000019817.18	Plagl1	chr10	13060504	13131694	HAVANA	+	protein_coding	NA	NA	NA	NA	NA	NA	NA	NA	NA	NA	NA	NA	-2.11583	-1.97313	-1.78111	NA	NA	NA	NA	NA	NA	NA
Kupffer/Microglia age-repressed	ENSMUSG00000015652.9	Steap1	chr5	5736317	5749326	HAVANA	-	protein_coding	NA	NA	NA	NA	NA	NA	NA	NA	NA	NA	NA	NA	-2.38403	-2.61576	-2.37541	-3.14987	-2.30259	-2.9597	-1.13395	-0.917989	-1.0226	-1.00687
Kupffer/Microglia age-repressed	ENSMUSG00000014813.8	Stc1	chr14	69029289	69041401	ENSEMBL	+	protein_coding	NA	NA	NA	NA	NA	NA	NA	NA	NA	NA	NA	NA	-2.5832	NA	-4.40927	-4.51747	-4.04192	-3.52258	NA	NA	NA	NA
Kupffer/Microglia age-repressed	ENSMUSG00000001761.7	Smo	chr6	29735503	29761365	HAVANA	+	protein_coding	NA	NA	NA	NA	NA	NA	NA	NA	NA	NA	NA	NA	-1.99822	-1.9821	-2.19823	NA	-2.14101	NA	-0.801561	NA	-0.974672	NA
Kupffer/Microglia age-repressed	ENSMUSG00000022665.14	Ccdc80	chr16	45093402	45127924	HAVANA	+	protein_coding	NA	NA	NA	NA	NA	NA	NA	NA	NA	NA	NA	NA	NA	NA	NA	NA	NA	NA	-2.25205	-1.79307	-2.43394	-1.48032
Kupffer/Microglia age-repressed	ENSMUSG00000021760.3	Gpx8	chr13	113042763	113046388	ENSEMBL	-	protein_coding	NA	NA	NA	NA	NA	NA	NA	NA	NA	NA	NA	NA	NA	NA	NA	NA	NA	NA	-1.68029	-1.21182	-1.67389	-1.02921
Kupffer/Microglia age-repressed	ENSMUSG00000023905.14	Tnfrsf12a	chr17	23675447	23677449	ENSEMBL	-	protein_coding	NA	NA	NA	NA	NA	NA	NA	NA	NA	NA	NA	NA	NA	NA	NA	NA	NA	NA	-1.0961	NA	NA	NA
Kupffer/Microglia age-repressed	ENSMUSG00000072235.5	Tuba1a	chr15	98949841	98953551	HAVANA	-	protein_coding	NA	NA	NA	NA	NA	NA	NA	NA	NA	NA	NA	NA	NA	NA	NA	NA	NA	NA	-0.833054	NA	-0.807205	NA
Kupffer/Microglia age-repressed	ENSMUSG00000047281.3	Sfn	chr4	133600556	133602168	HAVANA	-	protein_coding	NA	NA	NA	NA	NA	NA	NA	NA	NA	NA	NA	NA	NA	NA	NA	NA	NA	NA	-1.06213	-1.01475	-0.8398	NA
Kupffer/Microglia age-repressed	ENSMUSG00000004044.9	Ptrf	chr11	100956733	100970887	HAVANA	-	protein_coding	NA	NA	NA	NA	NA	NA	NA	NA	NA	NA	NA	NA	NA	NA	NA	NA	NA	NA	-1.30691	-0.809734	-1.34044	-0.929692
Kupffer/Microglia age-repressed	ENSMUSG00000042363.14	Lgalsl	chr11	20823576	20831056	HAVANA	-	protein_coding	NA	NA	NA	NA	NA	NA	NA	NA	NA	NA	NA	NA	NA	NA	NA	NA	NA	NA	-1.02703	NA	NA	NA
Kupffer/Microglia age-repressed	ENSMUSG00000008206.16	Cers4	chr8	4493026	4531680	HAVANA	+	protein_coding	NA	NA	NA	NA	NA	NA	NA	NA	NA	-2.595	NA	-1.83421	NA	NA	NA	NA	NA	NA	-1.65607	NA	-1.51954	NA
Kupffer/Microglia age-repressed	ENSMUSG00000070436.12	Serpinh1	chr7	99345376	99353239	HAVANA	-	protein_coding	NA	NA	NA	NA	NA	NA	NA	NA	NA	NA	NA	NA	NA	NA	NA	NA	NA	NA	-1.3965	-1.02755	-1.20288	NA
Kupffer/Microglia age-repressed	ENSMUSG00000032702.16	Kank1	chr19	25236975	25434496	HAVANA	+	protein_coding	NA	NA	NA	NA	NA	NA	NA	NA	NA	NA	NA	NA	NA	NA	NA	NA	NA	NA	-1.48954	NA	-1.20504	-0.919834
Kupffer/Microglia age-repressed	ENSMUSG00000029070.9	Mxra8	chr4	155839680	155844088	HAVANA	+	protein_coding	NA	NA	NA	NA	NA	NA	NA	NA	NA	NA	NA	NA	NA	NA	NA	NA	NA	NA	-1.69622	-1.14481	-1.56929	-1.33559
Kupffer/Microglia age-repressed	ENSMUSG00000022656.15	Nectin3	chr16	46387706	46498525	HAVANA	-	protein_coding	NA	NA	NA	NA	NA	NA	NA	NA	NA	NA	NA	NA	NA	NA	NA	NA	NA	NA	-1.48416	-1.22985	-1.0965	-0.854471
Kupffer/Microglia age-repressed	ENSMUSG00000020451.17	Limk2	chr11	3344256	3409189	HAVANA	-	protein_coding	NA	NA	NA	NA	NA	NA	NA	NA	NA	NA	NA	NA	NA	NA	NA	NA	NA	NA	-1.0627	NA	-1.14661	NA
Kupffer/Microglia age-repressed	ENSMUSG00000053070.5	9230110C19Rik	chr9	8021672	8042823	HAVANA	-	protein_coding	NA	NA	NA	NA	NA	NA	NA	NA	NA	NA	NA	NA	NA	NA	NA	NA	NA	NA	-1.5395	-0.992428	-2.05279	-1.1872
Kupffer/Microglia age-repressed	ENSMUSG00000053646.13	Plxnb1	chr9	109095389	109119917	HAVANA	+	protein_coding	NA	NA	NA	NA	NA	NA	NA	NA	NA	NA	NA	NA	NA	NA	NA	NA	NA	NA	-2.03586	-1.58645	-1.98459	-1.43811
Kupffer/Microglia age-repressed	ENSMUSG00000030772.6	Dkk3	chr7	112116017	112159057	HAVANA	-	protein_coding	NA	NA	NA	NA	NA	NA	NA	NA	NA	NA	NA	NA	NA	NA	NA	NA	NA	NA	-3.59036	NA	-4.49758	NA
Kupffer/Microglia age-repressed	ENSMUSG00000032531.15	Amotl2	chr9	102716672	102733418	HAVANA	+	protein_coding	NA	NA	NA	NA	NA	NA	NA	NA	NA	NA	NA	NA	NA	NA	NA	NA	NA	NA	-1.5261	-1.08213	-1.18221	NA
Kupffer/Microglia age-repressed	ENSMUSG00000052911.9	Lamb2	chr9	108479736	108490530	HAVANA	+	protein_coding	NA	NA	NA	NA	NA	NA	NA	NA	NA	NA	NA	NA	NA	NA	NA	NA	NA	NA	-1.19261	NA	-1.07452	-0.884106
Kupffer/Microglia age-repressed	ENSMUSG00000049532.10	Sall2	chr14	52311172	52328762	HAVANA	-	protein_coding	NA	NA	NA	NA	NA	NA	NA	NA	NA	NA	NA	NA	NA	NA	NA	NA	NA	NA	-0.831389	NA	NA	NA
Kupffer/Microglia age-repressed	ENSMUSG00000046768.13	Rhoj	chr12	75308322	75401456	HAVANA	+	protein_coding	NA	NA	NA	NA	NA	2.25606	NA	NA	NA	NA	NA	NA	NA	NA	NA	NA	NA	NA	-1.01513	NA	-1.43883	NA
Kupffer/Microglia age-repressed	ENSMUSG00000000184.12	Ccnd2	chr6	127125162	127152193	HAVANA	-	protein_coding	NA	NA	NA	NA	NA	NA	NA	NA	NA	NA	NA	NA	NA	NA	NA	NA	NA	NA	-1.54691	-1.46006	-1.66469	-0.982712
Kupffer/Microglia age-repressed	ENSMUSG00000019929.16	Dcn	chr10	97479609	97518143	HAVANA	+	protein_coding	NA	NA	NA	NA	NA	NA	NA	NA	NA	NA	NA	NA	NA	NA	NA	NA	NA	NA	-3.19375	NA	-2.79719	NA
Kupffer/Microglia age-repressed	ENSMUSG00000028195.4	Cyr61	chr3	145646976	145649981	HAVANA	-	protein_coding	NA	NA	NA	NA	NA	NA	NA	NA	NA	NA	NA	NA	NA	NA	NA	NA	NA	NA	-1.35226	-0.885522	-1.21633	-0.921693
Kupffer/Microglia age-repressed	ENSMUSG00000031990.15	Jam3	chr9	27097384	27155421	HAVANA	-	protein_coding	NA	NA	NA	NA	NA	NA	NA	NA	NA	NA	NA	NA	NA	NA	NA	NA	NA	NA	-1.05859	NA	-1.20411	-1.02591
Kupffer/Microglia age-repressed	ENSMUSG00000030688.15	Stard10	chr7	101317086	101346626	HAVANA	+	protein_coding	NA	NA	NA	NA	NA	NA	NA	NA	NA	NA	NA	NA	NA	NA	NA	NA	NA	NA	-1.16734	NA	-1.12293	NA
Kupffer/Microglia age-repressed	ENSMUSG00000029761.16	Cald1	chr6	34598500	34775473	HAVANA	+	protein_coding	NA	NA	NA	NA	NA	NA	NA	NA	NA	NA	NA	NA	NA	NA	NA	NA	NA	NA	-1.39045	-1.12125	-1.40207	-1.02902
Kupffer/Microglia age-repressed	ENSMUSG00000030770.15	Parva	chr7	112427505	112591692	HAVANA	+	protein_coding	NA	NA	NA	NA	NA	NA	NA	NA	NA	NA	NA	NA	NA	NA	NA	NA	NA	NA	-1.19948	-1.09779	-1.41666	-1.00296
Kupffer/Microglia age-repressed	ENSMUSG00000060429.11	Sntb1	chr15	55638843	55906949	HAVANA	-	protein_coding	NA	NA	NA	NA	NA	NA	NA	NA	NA	NA	NA	NA	NA	NA	NA	NA	NA	NA	-2.24849	NA	-2.57118	NA
Kupffer/Microglia age-repressed	ENSMUSG00000049382.9	Krt8	chr15	101996711	102004342	ENSEMBL	-	protein_coding	NA	NA	NA	NA	NA	NA	NA	NA	NA	NA	NA	NA	NA	NA	NA	NA	NA	NA	-1.57486	-1.52269	-1.33591	-1.33036
Kupffer/Microglia age-repressed	ENSMUSG00000039629.14	Strip2	chr6	29917012	29959681	HAVANA	+	protein_coding	NA	NA	NA	NA	NA	NA	NA	NA	NA	NA	NA	NA	NA	NA	NA	NA	NA	NA	-2.03108	-1.41156	-2.60433	-1.42364
Kupffer/Microglia age-repressed	ENSMUSG00000025185.14	Loxl4	chr19	42593982	42612813	HAVANA	-	protein_coding	NA	NA	NA	NA	NA	NA	NA	NA	NA	NA	NA	NA	NA	NA	NA	NA	NA	NA	-1.11523	NA	-1.05258	NA
Kupffer/Microglia age-repressed	ENSMUSG00000021493.15	Pdlim7	chr13	55495795	55513676	HAVANA	-	protein_coding	NA	NA	NA	NA	NA	NA	NA	NA	NA	NA	NA	NA	NA	NA	NA	NA	NA	NA	-1.06548	NA	-0.815255	NA
Kupffer/Microglia age-repressed	ENSMUSG00000057465.5	Saa2	chr7	46751790	46754313	HAVANA	+	protein_coding	NA	NA	NA	NA	NA	NA	NA	NA	NA	NA	NA	NA	NA	NA	NA	NA	NA	NA	-3.46244	NA	-3.51155	NA
Kupffer/Microglia age-repressed	ENSMUSG00000074415.12	2610203C20Rik	chr9	41327260	41655483	HAVANA	+	processed_transcript	NA	NA	NA	NA	NA	NA	NA	NA	NA	NA	NA	NA	NA	NA	NA	NA	NA	NA	-1.30051	-1.08552	-1.54435	NA
Kupffer/Microglia age-repressed	ENSMUSG00000025867.8	Cplx2	chr13	54371349	54383917	HAVANA	+	protein_coding	NA	NA	NA	NA	NA	NA	NA	NA	NA	NA	NA	NA	NA	NA	NA	NA	NA	NA	-1.68815	NA	-1.36211	-1.25053
Kupffer/Microglia age-repressed	ENSMUSG00000000915.15	Hip1r	chr5	123973628	124005558	HAVANA	+	protein_coding	NA	NA	NA	NA	NA	NA	NA	NA	NA	NA	NA	NA	NA	NA	NA	NA	NA	NA	-1.07681	NA	-0.911194	NA
Kupffer/Microglia age-repressed	ENSMUSG00000041343.19	Ankrd42	chr7	92581723	92637142	HAVANA	-	protein_coding	NA	NA	NA	NA	NA	NA	NA	NA	NA	NA	NA	NA	NA	NA	NA	NA	NA	NA	-1.04418	NA	-1.00402	-0.9413
Kupffer/Microglia age-repressed	ENSMUSG00000024664.4	Fads3	chr19	10041548	10059671	ENSEMBL	+	protein_coding	NA	NA	NA	NA	NA	NA	NA	NA	NA	NA	NA	NA	NA	NA	NA	NA	NA	NA	-1.1172	-0.84683	-1.1104	-0.828667
Kupffer/Microglia age-repressed	ENSMUSG00000019889.10	Ptprk	chr10	28074820	28597397	HAVANA	+	protein_coding	NA	NA	NA	NA	NA	NA	NA	NA	NA	NA	NA	NA	NA	NA	NA	NA	NA	-1.1267	-1.52381	-1.12414	-1.58009	NA
Kupffer/Microglia age-repressed	ENSMUSG00000000392.17	Fap	chr2	62500943	62574075	HAVANA	-	protein_coding	NA	NA	NA	NA	NA	NA	NA	NA	NA	NA	NA	NA	NA	NA	NA	NA	NA	NA	-1.30276	NA	-0.881989	NA
Kupffer/Microglia age-repressed	ENSMUSG00000022528.7	Hes1	chr16	30064384	30067796	HAVANA	+	protein_coding	NA	NA	NA	NA	NA	NA	NA	NA	NA	NA	NA	NA	NA	NA	NA	NA	NA	NA	-1.17664	NA	-1.08902	NA
Kupffer/Microglia age-repressed	ENSMUSG00000069769.13	Msi2	chr11	88339382	88718513	HAVANA	-	protein_coding	NA	NA	NA	NA	NA	NA	NA	NA	NA	NA	NA	NA	NA	NA	NA	NA	NA	NA	-0.903162	NA	-1.10394	NA
Kupffer/Microglia age-repressed	ENSMUSG00000035873.8	Pawr	chr10	108332121	108414240	HAVANA	+	protein_coding	NA	NA	NA	NA	NA	NA	NA	NA	NA	NA	NA	NA	NA	NA	NA	NA	NA	NA	-1.47656	-1.07931	-1.34951	NA
Kupffer/Microglia age-repressed	ENSMUSG00000030029.14	Lrig1	chr6	94604529	94700158	HAVANA	-	protein_coding	NA	NA	NA	NA	NA	NA	NA	NA	NA	NA	NA	NA	NA	NA	NA	NA	NA	NA	-1.36571	NA	-1.30997	NA
Kupffer/Microglia age-repressed	ENSMUSG00000028949.13	Smarcd3	chr5	24590818	24624411	HAVANA	-	protein_coding	NA	NA	NA	NA	NA	NA	NA	NA	NA	NA	NA	NA	NA	NA	NA	NA	NA	NA	-1.59943	NA	-1.98841	NA
Kupffer/Microglia age-repressed	ENSMUSG00000029090.12	Adgra3	chr5	49959956	50059006	HAVANA	-	protein_coding	NA	NA	NA	NA	NA	NA	NA	NA	NA	NA	NA	NA	NA	NA	NA	NA	NA	NA	-0.937282	NA	-1.22625	NA
Kupffer/Microglia age-repressed	ENSMUSG00000036667.14	Tcaf1	chr6	42668002	42710088	HAVANA	-	protein_coding	NA	NA	NA	NA	NA	NA	NA	NA	NA	NA	NA	NA	NA	NA	NA	NA	NA	NA	-0.826996	NA	-1.01989	NA
Kupffer/Microglia age-repressed	ENSMUSG00000041688.16	Amot	chrX	145446425	145505181	HAVANA	-	protein_coding	NA	NA	NA	NA	NA	NA	NA	NA	NA	NA	NA	NA	NA	NA	NA	NA	NA	NA	-1.19527	-1.13696	-1.30911	NA
Kupffer/Microglia age-repressed	ENSMUSG00000027800.14	Tm4sf1	chr3	57285611	57301988	HAVANA	-	protein_coding	NA	NA	NA	NA	NA	NA	NA	NA	NA	NA	NA	NA	NA	NA	NA	NA	NA	NA	-1.29601	NA	-1.41129	NA
Kupffer/Microglia age-repressed	ENSMUSG00000050052.12	Tdrp	chr8	13952008	13975032	HAVANA	-	protein_coding	NA	NA	NA	NA	NA	NA	NA	NA	NA	NA	NA	NA	NA	NA	NA	NA	NA	NA	-1.43652	NA	-1.30491	NA
Kupffer/Microglia age-repressed	ENSMUSG00000026604.17	Ptpn14	chr1	189728268	189876695	HAVANA	+	protein_coding	NA	NA	NA	NA	NA	NA	NA	NA	NA	NA	NA	NA	NA	NA	NA	NA	NA	NA	-0.96663	NA	-1.14693	-0.801022
Kupffer/Microglia age-repressed	ENSMUSG00000022178.10	Ajuba	chr14	54567469	54577661	ENSEMBL	-	protein_coding	NA	NA	NA	NA	NA	NA	NA	NA	NA	NA	NA	NA	NA	NA	NA	NA	NA	NA	-1.15869	NA	-1.01452	-1.18382
Kupffer/Microglia age-repressed	ENSMUSG00000021091.8	Serpina3n	chr12	104406729	104414329	HAVANA	+	protein_coding	NA	NA	NA	NA	NA	NA	NA	NA	NA	NA	NA	NA	NA	NA	NA	NA	NA	NA	-2.94749	NA	-3.4432	NA
Kupffer/Microglia age-repressed	ENSMUSG00000025666.16	Tmem47	chrX	81070698	81097872	HAVANA	+	protein_coding	NA	NA	NA	NA	NA	NA	NA	NA	NA	NA	NA	NA	NA	NA	NA	NA	NA	NA	-1.39933	NA	-1.47378	NA
Kupffer/Microglia age-repressed	ENSMUSG00000030281.16	Il17rc	chr6	113471427	113483140	HAVANA	+	protein_coding	NA	NA	NA	NA	NA	NA	NA	NA	NA	NA	NA	NA	NA	NA	NA	NA	NA	NA	-1.696	NA	-1.4812	NA
Kupffer/Microglia age-repressed	ENSMUSG00000052539.15	Magi3	chr3	104013259	104220374	HAVANA	-	protein_coding	NA	NA	NA	NA	NA	NA	NA	NA	NA	NA	NA	NA	NA	NA	NA	NA	NA	NA	-0.810803	NA	NA	NA
Kupffer/Microglia age-repressed	ENSMUSG00000008090.14	Fgfrl1	chr5	108692382	108706924	HAVANA	+	protein_coding	NA	NA	NA	NA	NA	NA	NA	NA	NA	NA	NA	NA	NA	NA	NA	NA	NA	NA	-0.947581	NA	-0.987434	NA
Kupffer/Microglia age-repressed	ENSMUSG00000036109.17	Mbnl3	chrX	51117269	51206532	HAVANA	-	protein_coding	NA	NA	NA	NA	NA	NA	NA	NA	NA	NA	NA	NA	NA	NA	NA	NA	NA	NA	-1.16834	-1.38915	-1.56285	NA
Kupffer/Microglia age-repressed	ENSMUSG00000107215.1	Gm43197	chr6	3336772	3339354	HAVANA	-	TEC	NA	NA	NA	NA	NA	NA	NA	NA	NA	NA	NA	NA	NA	NA	NA	NA	NA	NA	0.841613	NA	NA	NA
Kupffer/Microglia age-repressed	ENSMUSG00000028218.19	Fam92a	chr4	12153409	12172015	HAVANA	-	protein_coding	NA	NA	NA	NA	NA	NA	NA	NA	NA	NA	NA	NA	NA	NA	NA	NA	NA	NA	-0.890862	NA	-0.811064	-0.806266
Kupffer/Microglia age-repressed	ENSMUSG00000052727.5	Map1b	chr13	99421464	99516602	ENSEMBL	-	protein_coding	NA	NA	NA	NA	NA	NA	NA	NA	NA	NA	NA	NA	NA	NA	NA	NA	NA	NA	-1.11782	NA	-1.37545	NA
Kupffer/Microglia age-repressed	ENSMUSG00000051029.8	Serpinb1b	chr13	33078575	33094380	HAVANA	+	protein_coding	NA	NA	NA	NA	NA	NA	NA	NA	NA	NA	NA	NA	NA	NA	NA	NA	NA	NA	-1.04738	NA	NA	NA
Kupffer/Microglia age-repressed	ENSMUSG00000037972.6	Snn	chr16	11066298	11074983	ENSEMBL	+	protein_coding	NA	NA	NA	NA	NA	NA	NA	NA	NA	NA	1.50205	NA	NA	NA	NA	NA	NA	NA	-0.811601	NA	NA	NA
Kupffer/Microglia age-repressed	ENSMUSG00000026778.13	Prkcq	chr2	11172108	11301222	HAVANA	+	protein_coding	NA	NA	NA	NA	NA	NA	NA	NA	NA	NA	NA	NA	NA	NA	NA	NA	NA	NA	-1.48478	NA	-2.59196	NA
Kupffer/Microglia age-repressed	ENSMUSG00000021662.9	Arhgef28	chr13	97898595	98206165	ENSEMBL	-	protein_coding	NA	NA	NA	NA	NA	NA	NA	NA	NA	NA	NA	NA	NA	NA	NA	NA	NA	NA	-1.03804	NA	-0.844301	NA
Kupffer/Microglia age-repressed	ENSMUSG00000028633.7	Ctps	chr4	120539868	120570276	HAVANA	-	protein_coding	NA	NA	NA	NA	NA	NA	NA	NA	NA	NA	NA	NA	NA	NA	NA	NA	NA	NA	-0.854028	NA	-1.244	-0.801058
Kupffer/Microglia age-repressed	ENSMUSG00000001552.14	Jup	chr11	100368958	100397763	HAVANA	-	protein_coding	NA	NA	NA	NA	NA	NA	NA	NA	NA	NA	NA	NA	NA	NA	NA	NA	NA	NA	-0.986771	NA	NA	NA
Kupffer/Microglia age-repressed	ENSMUSG00000019996.17	Map7	chr10	20148471	20281590	HAVANA	+	protein_coding	NA	NA	NA	NA	NA	NA	NA	NA	NA	NA	NA	NA	NA	NA	NA	NA	NA	NA	-0.875129	NA	-0.827264	NA
Kupffer/Microglia age-repressed	ENSMUSG00000030091.17	Nup210	chr6	91013068	91116829	HAVANA	-	protein_coding	NA	NA	NA	NA	NA	NA	NA	NA	NA	NA	NA	NA	NA	NA	NA	NA	NA	NA	0.821585	NA	NA	NA
Kupffer/Microglia age-repressed	ENSMUSG00000028125.14	Abca4	chr3	122044443	122180123	HAVANA	+	protein_coding	NA	NA	NA	NA	NA	NA	NA	NA	NA	NA	NA	NA	NA	NA	NA	NA	NA	NA	-1.42643	NA	-1.54742	NA
Kupffer/Microglia age-repressed	ENSMUSG00000024883.6	Rin1	chr19	5050808	5057071	ENSEMBL	+	protein_coding	NA	NA	NA	NA	NA	NA	NA	NA	NA	NA	NA	NA	NA	NA	NA	NA	NA	NA	-1.00095	NA	-1.24464	NA
Kupffer/Microglia age-repressed	ENSMUSG00000039103.12	Nexn	chr3	152236982	152266350	HAVANA	-	protein_coding	NA	NA	NA	NA	NA	NA	NA	NA	NA	NA	NA	NA	NA	NA	NA	NA	NA	NA	-1.21143	NA	-1.84427	NA
Kupffer/Microglia age-repressed	ENSMUSG00000053965.10	Pde5a	chr3	122728947	122859374	HAVANA	+	protein_coding	NA	NA	NA	NA	NA	NA	NA	NA	NA	NA	NA	NA	NA	NA	NA	NA	NA	NA	-1.11243	NA	-1.25595	NA
Kupffer/Microglia age-repressed	ENSMUSG00000025889.13	Snca	chr6	60731575	60829855	HAVANA	-	protein_coding	NA	NA	NA	NA	NA	NA	NA	NA	NA	NA	NA	NA	NA	NA	NA	NA	NA	NA	-2.48642	NA	NA	NA
Kupffer/Microglia age-repressed	ENSMUSG00000020108.4	Ddit4	chr10	59949669	59951834	HAVANA	-	protein_coding	NA	NA	NA	NA	NA	NA	NA	NA	NA	NA	NA	NA	NA	NA	NA	NA	NA	NA	-1.03018	NA	NA	NA
Kupffer/Microglia age-repressed	ENSMUSG00000024486.5	Hbegf	chr18	36504929	36515805	ENSEMBL	-	protein_coding	NA	NA	NA	NA	NA	NA	NA	NA	NA	NA	NA	NA	NA	NA	NA	NA	NA	NA	-1.24873	NA	NA	NA
Kupffer/Microglia age-repressed	ENSMUSG00000041189.9	Chrnb1	chr11	69784036	69795943	HAVANA	-	protein_coding	NA	NA	NA	NA	NA	NA	NA	NA	NA	NA	NA	NA	NA	NA	NA	NA	NA	NA	-1.16384	NA	-1.17549	NA
Kupffer/Microglia age-repressed	ENSMUSG00000073627.7	C130036L24Rik	chr1	86359574	86373791	HAVANA	+	processed_transcript	NA	NA	NA	NA	NA	NA	NA	NA	NA	NA	NA	NA	NA	NA	NA	NA	NA	NA	0.986261	NA	NA	NA
Kupffer/Microglia age-repressed	ENSMUSG00000038384.16	Setd1b	chr5	123142193	123168629	HAVANA	+	protein_coding	NA	NA	NA	NA	NA	NA	NA	NA	NA	NA	NA	NA	NA	NA	NA	NA	NA	NA	0.994215	NA	NA	NA
Kupffer/Microglia age-repressed	ENSMUSG00000028532.14	Cachd1	chr4	100776675	101029220	HAVANA	+	protein_coding	NA	NA	NA	NA	NA	NA	NA	NA	NA	NA	NA	NA	NA	NA	NA	NA	NA	NA	-1.47674	NA	-1.67291	NA
Kupffer/Microglia age-repressed	ENSMUSG00000013033.16	Adgrl1	chr8	83900105	83941954	HAVANA	+	protein_coding	NA	NA	NA	NA	NA	NA	NA	NA	NA	NA	NA	NA	NA	NA	NA	NA	NA	NA	-1.33821	NA	NA	NA
Kupffer/Microglia age-repressed	ENSMUSG00000040606.13	Kazn	chr4	142102390	142239401	HAVANA	-	protein_coding	NA	NA	NA	NA	NA	NA	NA	NA	NA	NA	NA	NA	NA	NA	NA	NA	NA	NA	-0.878049	-0.884174	-1.56962	-1.60562
Kupffer/Microglia age-repressed	ENSMUSG00000103677.1	Pcdhga4	chr18	37685210	37841873	HAVANA	+	protein_coding	NA	NA	NA	NA	NA	NA	NA	NA	NA	NA	NA	NA	NA	NA	NA	NA	NA	NA	0.861467	NA	NA	NA
Kupffer/Microglia age-repressed	ENSMUSG00000020122.16	Egfr	chr11	16752203	16918158	HAVANA	+	protein_coding	NA	NA	NA	NA	NA	NA	NA	NA	NA	NA	NA	NA	NA	NA	NA	NA	NA	NA	-0.972473	NA	-1.39206	NA
Kupffer/Microglia age-repressed	ENSMUSG00000097113.7	Gm19705	chr1	136670769	136690804	HAVANA	+	lincRNA	NA	NA	NA	NA	NA	NA	NA	NA	NA	NA	NA	NA	NA	NA	NA	NA	NA	NA	-1.39081	NA	NA	NA
Kupffer/Microglia age-repressed	ENSMUSG00000110245.1	Gm20100	chr8	11457471	11459742	HAVANA	-	TEC	NA	NA	NA	NA	NA	NA	NA	NA	NA	NA	NA	NA	NA	NA	NA	NA	NA	NA	1.41625	NA	NA	NA
Kupffer/Microglia age-repressed	ENSMUSG00000028445.7	Enho	chr4	41638144	41640324	HAVANA	-	protein_coding	NA	NA	NA	NA	NA	NA	NA	NA	NA	NA	NA	NA	NA	NA	NA	NA	NA	NA	-0.998274	NA	NA	NA
Kupffer/Microglia age-repressed	ENSMUSG00000006403.13	Adamts4	chr1	171250421	171260637	HAVANA	+	protein_coding	NA	NA	NA	NA	NA	NA	NA	NA	NA	NA	NA	NA	NA	NA	NA	NA	NA	NA	-1.12872	NA	NA	NA
Kupffer/Microglia age-repressed	ENSMUSG00000089774.2	Slc5a3	chr16	92058322	92087473	HAVANA	+	protein_coding	NA	NA	NA	NA	NA	NA	NA	NA	NA	NA	NA	NA	NA	NA	NA	NA	NA	NA	-0.832195	NA	NA	NA
Kupffer/Microglia age-repressed	ENSMUSG00000028019.9	Pdgfc	chr3	81036416	81214040	HAVANA	+	protein_coding	NA	NA	NA	NA	NA	NA	NA	NA	NA	NA	NA	NA	NA	NA	NA	NA	NA	NA	-0.983218	NA	-1.32778	NA
Kupffer/Microglia age-repressed	ENSMUSG00000026678.10	Rgs5	chr1	169655501	169695813	HAVANA	+	protein_coding	NA	NA	NA	NA	NA	NA	NA	NA	NA	NA	NA	NA	NA	NA	NA	NA	NA	NA	-1.22239	NA	-1.43332	NA
Kupffer/Microglia age-repressed	ENSMUSG00000028469.15	Npr2	chr4	43631935	43651244	HAVANA	+	protein_coding	NA	NA	NA	NA	NA	NA	NA	NA	NA	NA	NA	NA	NA	NA	NA	NA	NA	NA	-1.13803	-1.60902	-1.73452	NA
Kupffer/Microglia age-repressed	ENSMUSG00000025408.15	Ddit3	chr10	127290774	127296288	HAVANA	+	protein_coding	NA	NA	NA	NA	NA	NA	NA	NA	NA	NA	NA	NA	NA	NA	NA	NA	NA	NA	0.932889	NA	0.897647	NA
Kupffer/Microglia age-repressed	ENSMUSG00000037239.8	Spred3	chr7	29158829	29170411	HAVANA	-	protein_coding	NA	NA	NA	NA	NA	NA	NA	NA	NA	NA	NA	NA	NA	NA	NA	NA	NA	NA	-1.04863	NA	NA	-1.16354
Kupffer/Microglia age-repressed	ENSMUSG00000022052.8	Ppp2r2a	chr14	67014057	67072471	ENSEMBL	-	protein_coding	NA	NA	NA	NA	NA	NA	NA	NA	NA	NA	NA	NA	NA	NA	NA	NA	NA	NA	1.00604	NA	NA	NA
Kupffer/Microglia age-repressed	ENSMUSG00000108181.1	C030015A19Rik	chr6	90386807	90389357	HAVANA	+	TEC	NA	NA	NA	NA	NA	NA	NA	NA	NA	NA	NA	NA	NA	NA	NA	NA	NA	NA	0.815153	NA	NA	NA
Kupffer/Microglia age-repressed	ENSMUSG00000049044.16	Rapgef4	chr2	71981240	72257474	HAVANA	+	protein_coding	NA	NA	NA	NA	NA	NA	NA	NA	NA	NA	NA	NA	NA	NA	NA	NA	NA	NA	-0.917336	NA	-1.11244	NA
Kupffer/Microglia age-repressed	ENSMUSG00000001507.16	Itga3	chr11	95044474	95076801	HAVANA	-	protein_coding	NA	NA	NA	NA	NA	NA	NA	NA	NA	NA	NA	NA	NA	NA	NA	NA	NA	NA	-0.880709	NA	-1.0471	NA
Kupffer/Microglia age-repressed	ENSMUSG00000034520.14	Gjc1	chr11	102799579	102819700	HAVANA	-	protein_coding	NA	NA	NA	NA	NA	NA	NA	NA	NA	NA	NA	NA	NA	NA	NA	NA	NA	NA	-1.38486	NA	NA	NA
Kupffer/Microglia age-repressed	ENSMUSG00000097572.2	Gm26797	chr9	122295869	122310928	HAVANA	-	lincRNA	NA	NA	NA	NA	NA	NA	NA	NA	NA	NA	NA	NA	NA	NA	NA	NA	NA	NA	0.993868	NA	NA	NA
Kupffer/Microglia age-repressed	ENSMUSG00000107083.1	Gm43313	chr5	32467195	32469429	HAVANA	+	TEC	NA	NA	NA	NA	NA	NA	NA	NA	NA	NA	NA	NA	NA	NA	NA	NA	NA	NA	0.899141	NA	1.24802	NA
Kupffer/Microglia age-repressed	ENSMUSG00000102496.1	Gm36989	chr18	35574907	35577066	HAVANA	+	TEC	NA	NA	NA	NA	NA	NA	NA	NA	NA	NA	NA	NA	NA	NA	NA	NA	NA	NA	0.859709	NA	NA	NA
Kupffer/Microglia age-repressed	ENSMUSG00000058420.8	Syt17	chr7	118380717	118448222	HAVANA	-	protein_coding	NA	NA	NA	NA	NA	NA	NA	NA	NA	NA	NA	NA	NA	NA	NA	NA	NA	NA	-1.27381	NA	-1.3528	NA
Kupffer/Microglia age-repressed	ENSMUSG00000023262.13	Acy1	chr9	106432981	106438319	HAVANA	-	protein_coding	NA	NA	NA	NA	NA	NA	NA	NA	NA	NA	NA	NA	NA	NA	NA	NA	NA	NA	NA	-1.00428	-0.895263	-0.993554
Kupffer/Microglia age-repressed	ENSMUSG00000031618.13	Nr3c2	chr8	76899442	77245012	HAVANA	+	protein_coding	NA	NA	NA	NA	NA	NA	NA	NA	NA	NA	NA	NA	NA	NA	NA	NA	NA	NA	NA	0.90185	NA	NA
Kupffer/Microglia age-repressed	ENSMUSG00000090626.9	Tex9	chr9	72450394	72492212	HAVANA	-	protein_coding	NA	NA	NA	NA	NA	NA	NA	NA	NA	NA	NA	NA	NA	NA	NA	NA	NA	NA	NA	-0.855288	-1.15537	NA
Kupffer/Microglia age-repressed	ENSMUSG00000038067.2	Csf3	chr11	98701263	98703629	HAVANA	+	protein_coding	NA	NA	NA	NA	NA	NA	NA	NA	NA	NA	NA	NA	NA	NA	NA	NA	NA	NA	NA	-1.20476	NA	NA
BMDM-specific	ENSMUSG00000027827.16	Kcnab1	chr3	65109384	65378223	HAVANA	+	protein_coding	3.78691	NA	NA	NA	NA	NA	NA	NA	NA	NA	NA	NA	NA	NA	NA	NA	NA	NA	NA	NA	NA	NA
BMDM-specific	ENSMUSG00000072674.10	Plac9b	chr14	26167405	26182480	HAVANA	-	protein_coding	NA	7.76434	NA	NA	NA	NA	NA	NA	NA	NA	NA	NA	NA	NA	NA	NA	NA	NA	NA	NA	-6.52277	NA
BMDM-specific	ENSMUSG00000024620.11	Pdgfrb	chr18	61045150	61085061	HAVANA	+	protein_coding	NA	2.67308	NA	NA	NA	NA	NA	NA	NA	NA	NA	NA	NA	NA	NA	NA	NA	NA	NA	NA	NA	NA
BMDM-specific	ENSMUSG00000076613.4	Ighg2b	chr12	113302965	113307933	HAVANA	-	IG_C_gene	NA	13.31	NA	NA	NA	13.6594	NA	NA	NA	NA	NA	NA	NA	NA	NA	10.8186	NA	5.5192	NA	NA	NA	NA
BMDM-specific	ENSMUSG00000031613.9	Hpgd	chr8	56294585	56321043	HAVANA	+	protein_coding	NA	NA	NA	NA	NA	NA	-2.37211	-1.88333	NA	NA	NA	NA	NA	NA	NA	NA	NA	NA	NA	NA	NA	NA
BMDM-specific	ENSMUSG00000096768.7	Erdr1	chrY	90784738	90816464	ENSEMBL	+	protein_coding	NA	NA	NA	NA	NA	NA	2.60207	NA	2.83235	NA	2.53908	NA	NA	NA	NA	NA	NA	NA	NA	NA	NA	NA
BMDM-specific	ENSMUSG00000099250.1	Rn7s2	chr12	69361182	69361481	ENSEMBL	-	misc_RNA	NA	NA	NA	NA	NA	NA	1.61751	NA	NA	NA	NA	NA	NA	NA	NA	NA	NA	NA	NA	NA	NA	NA
BMDM-specific	ENSMUSG00000099021.1	Rn7s1	chr12	69159295	69159594	ENSEMBL	+	misc_RNA	NA	NA	NA	NA	NA	NA	1.59818	NA	NA	NA	NA	NA	NA	NA	NA	NA	NA	NA	NA	NA	NA	NA
BMDM-specific	ENSMUSG00000040229.11	Gpr34	chrX	13632089	13640858	HAVANA	+	protein_coding	NA	NA	NA	NA	NA	NA	-1.43607	-2.5768	NA	NA	NA	NA	NA	NA	NA	NA	NA	NA	NA	NA	NA	NA
BMDM-specific	ENSMUSG00000030117.5	Gdf3	chr6	122605403	122610087	HAVANA	-	protein_coding	NA	NA	NA	NA	NA	1.54141	NA	6.36214	NA	7.62938	NA	7.9311	3.36785	5.01582	3.00549	5.32502	NA	4.84754	NA	NA	NA	NA
BMDM-specific	ENSMUSG00000051212.7	Gpr183	chr14	121952331	121965193	ENSEMBL	-	protein_coding	NA	NA	NA	NA	NA	NA	NA	-2.10838	NA	NA	NA	NA	NA	NA	NA	NA	NA	NA	NA	NA	NA	NA
BMDM-specific	ENSMUSG00000032369.13	Plscr1	chr9	92249750	92272278	HAVANA	+	protein_coding	NA	NA	NA	NA	NA	NA	NA	0.914676	NA	1.69777	NA	1.33495	NA	NA	NA	NA	NA	NA	NA	NA	NA	NA
BMDM-specific	ENSMUSG00000107068.1	Gm42742	chr7	127015051	127021097	HAVANA	-	protein_coding	NA	NA	NA	NA	NA	NA	NA	-5.83726	NA	NA	NA	NA	NA	NA	NA	NA	NA	NA	NA	NA	NA	NA
BMDM-specific	ENSMUSG00000002204.9	Napsa	chr7	44572380	44586862	HAVANA	+	protein_coding	NA	NA	NA	NA	NA	NA	NA	1.57205	NA	1.75441	NA	2.01083	NA	NA	NA	NA	NA	NA	NA	NA	NA	NA
BMDM-specific	ENSMUSG00000042476.12	Abcb4	chr5	8893717	8959231	HAVANA	+	protein_coding	NA	NA	NA	NA	NA	NA	NA	-1.81391	NA	NA	NA	NA	NA	NA	NA	NA	NA	NA	NA	NA	NA	NA
BMDM-specific	ENSMUSG00000024349.9	Tmem173	chr18	35733678	35740554	ENSEMBL	-	protein_coding	NA	NA	NA	NA	NA	NA	NA	-0.817467	NA	NA	NA	NA	NA	NA	NA	NA	NA	NA	NA	NA	NA	NA
BMDM-specific	ENSMUSG00000031927.9	1700012B09Rik	chr9	14756587	14771030	HAVANA	-	protein_coding	NA	NA	NA	NA	NA	NA	NA	5.1962	NA	NA	NA	NA	NA	NA	NA	NA	NA	NA	NA	NA	NA	NA
BMDM-specific	ENSMUSG00000056758.14	Hmga2	chr10	120361275	120476469	HAVANA	-	protein_coding	NA	NA	NA	NA	NA	NA	NA	NA	NA	NA	NA	NA	-1.77585	NA	-1.88452	NA	-1.34804	-1.4539	NA	NA	NA	NA
BMDM-specific	ENSMUSG00000045875.12	Adra1a	chr14	66635251	66733462	HAVANA	+	protein_coding	NA	NA	NA	NA	NA	NA	NA	NA	NA	NA	NA	NA	NA	4.11616	NA	3.84833	4.26093	4.13988	NA	NA	NA	NA
BMDM-specific	ENSMUSG00000029816.10	Gpnmb	chr6	49036546	49070929	HAVANA	+	protein_coding	NA	NA	NA	NA	NA	NA	NA	NA	NA	NA	NA	NA	NA	1.24808	NA	1.50463	NA	2.01784	NA	NA	0.89751	1.11938
BMDM-specific	ENSMUSG00000020101.14	Vsir	chr10	60346851	60372684	HAVANA	+	protein_coding	NA	NA	NA	NA	NA	NA	NA	NA	NA	NA	NA	NA	NA	1.03615	NA	NA	NA	NA	NA	NA	NA	NA
BMDM-specific	ENSMUSG00000026335.16	Pam	chr1	97795114	98095646	HAVANA	-	protein_coding	NA	NA	NA	NA	NA	NA	NA	NA	NA	NA	NA	NA	NA	NA	NA	NA	NA	NA	-1.45132	NA	-1.70341	-0.967198
BMDM-specific	ENSMUSG00000004707.14	Ly9	chr1	171588624	171607410	HAVANA	-	protein_coding	NA	NA	NA	NA	NA	NA	NA	NA	NA	NA	NA	NA	NA	NA	NA	NA	NA	NA	1.00045	0.98761	NA	0.865441
BMDM-specific	ENSMUSG00000039007.9	Cpq	chr15	33083129	33594552	ENSEMBL	+	protein_coding	NA	NA	NA	NA	NA	NA	NA	NA	NA	NA	NA	NA	NA	NA	NA	NA	NA	NA	-1.83135	NA	-1.4831	-0.832777
BMDM-specific	ENSMUSG00000029661.16	Col1a2	chr6	4504814	4541544	HAVANA	+	protein_coding	NA	NA	NA	NA	NA	NA	NA	NA	NA	NA	NA	NA	NA	NA	NA	NA	NA	NA	-1.46955	-1.01887	-1.54399	-1.03172
BMDM-specific	ENSMUSG00000027533.10	Fabp5	chr3	10012548	10016607	HAVANA	+	protein_coding	NA	NA	NA	NA	NA	NA	NA	NA	NA	NA	NA	NA	NA	NA	NA	NA	NA	NA	1.3931	1.64021	1.63167	1.79723
BMDM-specific	ENSMUSG00000036777.8	Anln	chr9	22332012	22389188	HAVANA	-	protein_coding	NA	NA	NA	NA	NA	NA	NA	NA	NA	NA	NA	NA	NA	NA	NA	NA	NA	NA	-1.3984	-1.74332	-1.57627	-1.17564
BMDM-specific	ENSMUSG00000089762.3	Ier5l	chr2	30471537	30474219	HAVANA	-	protein_coding	NA	NA	NA	NA	NA	NA	NA	NA	NA	NA	NA	NA	NA	NA	NA	NA	NA	NA	-1.55216	NA	-1.08991	-1.33584
BMDM-specific	ENSMUSG00000030148.15	Clec4a2	chr6	123106428	123143999	HAVANA	+	protein_coding	NA	NA	NA	NA	NA	NA	NA	NA	NA	1.57164	NA	2.60944	NA	NA	NA	NA	NA	NA	-1.24942	NA	-1.10811	NA
BMDM-specific	ENSMUSG00000030605.15	Mfge8	chr7	79133768	79149060	HAVANA	-	protein_coding	NA	NA	NA	NA	NA	NA	NA	NA	NA	NA	NA	NA	NA	NA	NA	NA	NA	NA	-1.03029	NA	-0.997739	NA
BMDM-specific	ENSMUSG00000031451.6	Gas6	chr8	13465374	13494490	HAVANA	-	protein_coding	NA	NA	NA	NA	NA	NA	NA	NA	NA	NA	NA	NA	NA	NA	NA	NA	NA	NA	-1.49104	NA	-1.62864	-0.909607
BMDM-specific	ENSMUSG00000001270.9	Ckb	chr12	111669361	111672338	HAVANA	-	protein_coding	NA	NA	NA	NA	NA	NA	NA	NA	NA	NA	NA	NA	NA	NA	NA	NA	NA	NA	-1.04965	NA	-0.949365	NA
BMDM-specific	ENSMUSG00000092060.4	Bend4	chr5	67392147	67428310	HAVANA	-	protein_coding	NA	NA	NA	NA	NA	NA	NA	NA	NA	NA	NA	NA	NA	NA	NA	NA	NA	NA	-1.10083	NA	-0.825462	-1.53958
BMDM-specific	ENSMUSG00000026586.16	Prrx1	chr1	163245119	163313710	HAVANA	-	protein_coding	NA	NA	NA	NA	NA	NA	NA	NA	NA	NA	NA	NA	NA	NA	NA	NA	NA	NA	-2.40254	-1.42284	-2.8722	-1.8705
BMDM-specific	ENSMUSG00000033065.13	Pfkm	chr15	98092589	98132447	ENSEMBL	+	protein_coding	NA	NA	NA	NA	NA	NA	NA	NA	NA	NA	NA	NA	NA	NA	NA	NA	NA	NA	-1.31194	NA	-1.16776	NA
BMDM-specific	ENSMUSG00000025932.14	Eya1	chr1	14168954	14310235	HAVANA	-	protein_coding	NA	NA	NA	NA	NA	NA	NA	NA	NA	NA	NA	NA	NA	NA	NA	NA	NA	NA	-1.53899	-1.45358	-1.59681	-1.3174
BMDM-specific	ENSMUSG00000029819.6	Npy	chr6	49822710	49829507	HAVANA	+	protein_coding	NA	NA	NA	NA	NA	NA	NA	NA	NA	NA	NA	NA	NA	NA	NA	NA	NA	NA	2.03997	1.97122	1.90383	1.92861
BMDM-specific	ENSMUSG00000071637.5	Cebpd	chr16	15887286	15891031	HAVANA	+	protein_coding	NA	NA	NA	NA	NA	NA	NA	NA	NA	NA	NA	NA	NA	NA	NA	NA	NA	NA	-0.975748	NA	-1.04572	NA
BMDM-specific	ENSMUSG00000017493.12	Igfbp4	chr11	99041244	99054392	HAVANA	+	protein_coding	NA	NA	NA	NA	NA	NA	NA	NA	NA	NA	NA	NA	NA	NA	NA	NA	NA	NA	-1.70263	-1.31718	-1.87794	-1.50041
BMDM-specific	ENSMUSG00000007872.3	Id3	chr4	136143497	136145755	HAVANA	+	protein_coding	NA	NA	NA	NA	NA	NA	NA	NA	NA	NA	NA	NA	NA	NA	NA	NA	NA	NA	-1.41332	NA	-1.29136	NA
BMDM-specific	ENSMUSG00000029718.14	Pcolce	chr5	137605103	137613784	HAVANA	-	protein_coding	NA	NA	NA	NA	NA	NA	NA	NA	NA	NA	NA	NA	NA	NA	NA	NA	NA	NA	-1.45383	NA	-1.61646	-1.12936
BMDM-specific	ENSMUSG00000023367.14	Tmem176a	chr6	48840919	48847071	HAVANA	+	protein_coding	NA	NA	NA	NA	NA	NA	NA	NA	NA	NA	NA	NA	NA	NA	NA	NA	NA	NA	-1.46298	NA	-1.5391	NA
BMDM-specific	ENSMUSG00000020649.11	Rrm2	chr12	24708241	24714146	HAVANA	+	protein_coding	NA	NA	NA	NA	NA	NA	NA	NA	NA	NA	NA	NA	NA	NA	NA	NA	NA	NA	-1.05705	-1.42083	-0.937864	-0.828857
BMDM-specific	ENSMUSG00000070858.12	Gm1673	chr5	33983433	33985013	HAVANA	+	protein_coding	NA	NA	NA	NA	NA	NA	NA	NA	NA	NA	NA	NA	NA	NA	NA	NA	NA	NA	-1.75226	NA	NA	NA
BMDM-specific	ENSMUSG00000029108.14	Pcdh7	chr5	57717967	58133230	HAVANA	+	protein_coding	NA	NA	NA	NA	NA	NA	NA	NA	NA	NA	NA	NA	NA	NA	NA	NA	NA	NA	-1.24234	-0.935776	-1.06101	NA
BMDM-specific	ENSMUSG00000026483.13	Fam129a	chr1	151571186	151721939	HAVANA	+	protein_coding	NA	NA	NA	NA	NA	NA	NA	NA	NA	NA	NA	NA	NA	NA	NA	NA	NA	NA	0.91013	NA	NA	0.900192
BMDM-specific	ENSMUSG00000071723.7	Gspt2	chrX	94636069	94643244	HAVANA	+	protein_coding	NA	NA	NA	NA	NA	NA	NA	NA	NA	NA	NA	NA	NA	NA	NA	NA	NA	NA	-1.26265	NA	NA	NA
BMDM-specific	ENSMUSG00000038943.16	Prc1	chr7	80294450	80316259	HAVANA	+	protein_coding	NA	NA	NA	NA	NA	NA	NA	NA	NA	NA	NA	NA	NA	NA	NA	NA	NA	NA	-1.48797	-1.5003	NA	NA
BMDM-specific	ENSMUSG00000039209.12	Rpl39l	chr16	10170226	10174911	HAVANA	+	protein_coding	NA	NA	NA	NA	NA	NA	NA	NA	NA	NA	NA	NA	NA	NA	NA	NA	NA	NA	1.56581	NA	1.31683	NA
BMDM-specific	ENSMUSG00000021453.2	Gadd45g	chr13	51846678	51848468	HAVANA	+	protein_coding	NA	NA	NA	NA	NA	NA	NA	NA	NA	NA	NA	NA	NA	NA	NA	NA	NA	NA	-0.881489	NA	NA	NA
BMDM-specific	ENSMUSG00000101972.1	Hist1h3i	chr13	21782960	21783370	HAVANA	-	protein_coding	NA	NA	NA	NA	NA	NA	NA	NA	NA	2.16606	NA	NA	NA	NA	NA	NA	NA	NA	-1.56092	-1.32806	NA	NA
BMDM-specific	ENSMUSG00000021303.14	Gng4	chr13	13784059	13827896	HAVANA	+	protein_coding	NA	NA	NA	NA	NA	NA	NA	NA	NA	NA	NA	NA	NA	NA	NA	NA	NA	NA	1.16735	NA	NA	NA
BMDM-specific	ENSMUSG00000022114.4	Spry2	chr14	105891949	105896819	ENSEMBL	-	protein_coding	NA	NA	NA	NA	NA	NA	NA	NA	NA	NA	NA	NA	NA	NA	NA	NA	NA	NA	-1.04517	NA	-1.4899	NA
BMDM-specific	ENSMUSG00000101355.1	Hist1h3h	chr13	21717659	21718069	HAVANA	+	protein_coding	NA	NA	NA	NA	NA	NA	NA	NA	NA	NA	NA	NA	NA	NA	NA	NA	NA	NA	-1.74854	NA	NA	NA
BMDM-specific	ENSMUSG00000024654.8	Asrgl1	chr19	9109868	9135636	HAVANA	-	protein_coding	NA	NA	NA	NA	NA	NA	NA	NA	NA	NA	NA	NA	NA	NA	NA	NA	NA	NA	-0.850455	NA	-0.955718	NA
BMDM-specific	ENSMUSG00000000440.12	Pparg	chr6	115360951	115490399	HAVANA	+	protein_coding	NA	NA	NA	NA	NA	NA	NA	NA	NA	NA	NA	NA	NA	NA	NA	NA	NA	NA	-1.28163	NA	NA	NA
BMDM-specific	ENSMUSG00000022033.9	Pbk	chr14	65805837	65817822	HAVANA	+	protein_coding	NA	NA	NA	NA	NA	NA	NA	NA	NA	NA	NA	NA	NA	NA	NA	NA	NA	NA	-1.6616	-1.87146	NA	NA
BMDM-specific	ENSMUSG00000052609.9	Plekhg3	chr12	76530891	76580488	HAVANA	+	protein_coding	NA	NA	NA	NA	NA	NA	NA	NA	NA	NA	NA	NA	NA	NA	NA	NA	NA	NA	-0.860254	NA	-0.856769	-0.870991
BMDM-specific	ENSMUSG00000038179.13	Slamf7	chr1	171632403	171653035	HAVANA	-	protein_coding	NA	NA	NA	NA	NA	NA	NA	NA	NA	NA	NA	NA	NA	NA	NA	NA	NA	NA	0.883889	0.902489	NA	NA
BMDM-specific	ENSMUSG00000049119.14	Fam110b	chr4	5644090	6108223	HAVANA	+	protein_coding	NA	NA	NA	NA	NA	NA	NA	NA	NA	NA	NA	NA	NA	NA	NA	NA	NA	NA	-1.0131	NA	-1.14771	NA
BMDM-specific	ENSMUSG00000015305.6	Sash1	chr10	8722219	8886070	HAVANA	-	protein_coding	NA	NA	NA	NA	NA	NA	NA	NA	NA	NA	NA	NA	NA	NA	NA	NA	NA	NA	-0.850334	NA	-0.986757	NA
BMDM-specific	ENSMUSG00000017716.15	Birc5	chr11	117849251	117855743	HAVANA	+	protein_coding	NA	NA	NA	NA	NA	NA	NA	NA	NA	NA	NA	NA	NA	NA	NA	NA	NA	NA	-1.36038	-1.36076	NA	NA
BMDM-specific	ENSMUSG00000074785.5	Plxnc1	chr10	94790866	94944835	HAVANA	-	protein_coding	NA	NA	NA	NA	NA	NA	NA	NA	NA	NA	NA	NA	NA	NA	NA	NA	NA	NA	0.952232	NA	1.20077	1.01018
BMDM-specific	ENSMUSG00000041431.16	Ccnb1	chr13	100778650	100786570	HAVANA	-	protein_coding	NA	NA	NA	NA	NA	NA	NA	NA	NA	NA	NA	NA	NA	NA	NA	NA	NA	NA	-1.17001	-1.2789	NA	NA
BMDM-specific	ENSMUSG00000030677.8	Kif22	chr7	127027729	127042471	HAVANA	-	protein_coding	NA	NA	NA	NA	NA	NA	NA	NA	NA	NA	NA	NA	NA	NA	NA	NA	NA	NA	-1.22142	NA	NA	NA
BMDM-specific	ENSMUSG00000027469.16	Tpx2	chr2	152847964	152895321	HAVANA	+	protein_coding	NA	NA	NA	NA	NA	NA	NA	NA	NA	NA	NA	NA	NA	NA	NA	NA	NA	NA	-0.88673	NA	-0.950906	-0.929545
BMDM-specific	ENSMUSG00000001131.11	Timp1	chrX	20870166	20874735	HAVANA	+	protein_coding	NA	NA	NA	NA	NA	NA	NA	NA	NA	NA	NA	NA	NA	NA	NA	NA	NA	NA	-1.54391	NA	-1.35389	NA
BMDM-specific	ENSMUSG00000020914.17	Top2a	chr11	98992943	99024189	HAVANA	-	protein_coding	NA	NA	NA	NA	NA	NA	NA	NA	NA	NA	NA	3.28952	NA	NA	NA	NA	NA	NA	-1.24731	NA	NA	NA
BMDM-specific	ENSMUSG00000069301.5	Hist1h2ag	chr13	22042460	22042944	HAVANA	-	protein_coding	NA	NA	NA	NA	NA	NA	NA	NA	NA	NA	NA	NA	NA	NA	NA	NA	NA	NA	-1.75529	NA	NA	NA
BMDM-specific	ENSMUSG00000022021.13	Diaph3	chr14	86655367	87141224	ENSEMBL	-	protein_coding	NA	NA	NA	NA	NA	NA	NA	NA	NA	NA	NA	NA	NA	NA	NA	NA	NA	NA	-1.01115	-1.25956	NA	NA
BMDM-specific	ENSMUSG00000021728.7	Emb	chr13	117220625	117274098	HAVANA	+	protein_coding	NA	NA	NA	NA	NA	NA	NA	NA	NA	NA	-1.31745	NA	NA	NA	NA	NA	NA	NA	-1.05444	NA	-1.18335	NA
BMDM-specific	ENSMUSG00000055862.7	Izumo4	chr10	80702184	80705373	HAVANA	+	protein_coding	NA	NA	NA	NA	NA	NA	NA	NA	NA	NA	NA	NA	NA	NA	NA	NA	NA	NA	-1.67667	NA	NA	NA
BMDM-specific	ENSMUSG00000000753.15	Serpinf1	chr11	75409769	75422701	HAVANA	-	protein_coding	NA	NA	NA	NA	NA	NA	NA	NA	NA	NA	NA	NA	NA	NA	NA	NA	NA	NA	-1.80302	NA	NA	NA
BMDM-specific	ENSMUSG00000031840.12	Rab3a	chr8	70754679	70758677	HAVANA	+	protein_coding	NA	NA	NA	NA	NA	NA	NA	NA	NA	NA	NA	NA	NA	NA	NA	NA	NA	NA	-1.04176	NA	NA	NA
BMDM-specific	ENSMUSG00000019539.11	Rcn3	chr7	45082913	45092221	HAVANA	-	protein_coding	NA	NA	NA	NA	NA	NA	NA	NA	NA	NA	NA	NA	NA	NA	NA	NA	NA	NA	-0.800644	NA	-1.24416	NA
BMDM-specific	ENSMUSG00000038618.12	Rassf7	chr7	141215860	141218658	HAVANA	+	protein_coding	NA	NA	NA	NA	NA	NA	NA	NA	NA	NA	NA	NA	NA	NA	NA	NA	NA	NA	-0.810105	NA	NA	NA
BMDM-specific	ENSMUSG00000107869.1	Gm29848	chr6	67022177	67022471	HAVANA	+	processed_pseudogene	NA	NA	NA	NA	NA	NA	NA	NA	NA	NA	NA	NA	NA	NA	NA	NA	NA	NA	4.44905	NA	NA	NA
BMDM-specific	ENSMUSG00000050212.4	Eva1b	chr4	126147744	126149875	HAVANA	+	protein_coding	NA	NA	NA	NA	NA	NA	NA	NA	NA	NA	NA	NA	NA	NA	NA	NA	NA	NA	-0.935639	NA	NA	NA
BMDM-specific	ENSMUSG00000074280.6	Gm6166	chr9	57483963	57484371	HAVANA	+	processed_pseudogene	NA	NA	NA	NA	NA	NA	NA	NA	NA	NA	NA	NA	NA	NA	NA	NA	NA	NA	2.53802	2.46262	NA	NA
BMDM-specific	ENSMUSG00000002985.16	Apoe	chr7	19696109	19699188	HAVANA	-	protein_coding	NA	NA	NA	NA	NA	NA	NA	NA	NA	NA	NA	NA	NA	NA	NA	NA	NA	NA	1.41388	2.50235	1.72557	2.70177
BMDM-specific	ENSMUSG00000026764.15	Kif5c	chr2	49619298	49774778	HAVANA	+	protein_coding	NA	NA	NA	NA	NA	NA	NA	NA	NA	NA	NA	NA	NA	NA	NA	NA	NA	NA	-1.23124	NA	NA	NA
BMDM-specific	ENSMUSG00000027490.17	E2f1	chr2	154559407	154569892	HAVANA	-	protein_coding	NA	NA	NA	NA	NA	NA	NA	NA	NA	NA	NA	NA	NA	NA	NA	NA	NA	NA	-0.919969	NA	NA	NA
BMDM-specific	ENSMUSG00000020330.16	Hmmr	chr11	40701395	40733422	HAVANA	-	protein_coding	NA	NA	NA	NA	NA	3.29007	NA	NA	NA	NA	NA	NA	NA	NA	NA	NA	NA	NA	-1.39783	NA	NA	NA
BMDM-specific	ENSMUSG00000042647.13	Acad12	chr5	121596775	121618938	HAVANA	-	protein_coding	NA	NA	NA	NA	NA	NA	NA	NA	NA	NA	NA	NA	NA	NA	NA	NA	NA	NA	0.84336	NA	1.06307	NA
BMDM-specific	ENSMUSG00000047180.8	Neurl3	chr1	36264597	36274679	HAVANA	-	protein_coding	NA	NA	NA	NA	NA	NA	NA	NA	NA	NA	NA	NA	NA	NA	NA	NA	NA	NA	0.812544	NA	NA	1.04083
BMDM-specific	ENSMUSG00000002104.11	Rapsn	chr2	91035620	91045729	HAVANA	+	protein_coding	NA	NA	NA	NA	NA	NA	NA	NA	NA	NA	NA	NA	NA	NA	NA	NA	NA	NA	-1.08419	NA	NA	NA
BMDM-specific	ENSMUSG00000004105.8	Angptl2	chr2	33216069	33247717	HAVANA	+	protein_coding	NA	NA	NA	NA	NA	NA	NA	NA	NA	NA	NA	NA	NA	NA	NA	NA	NA	NA	NA	-0.849845	-0.872953	NA
BMDM-specific	ENSMUSG00000027699.19	Ect2	chr3	27097222	27153878	HAVANA	-	protein_coding	NA	NA	NA	NA	NA	NA	NA	NA	NA	NA	NA	NA	NA	NA	NA	NA	NA	NA	NA	-1.22978	NA	NA
BMDM-specific	ENSMUSG00000034906.15	Ncaph	chr2	127103809	127133954	HAVANA	-	protein_coding	NA	NA	NA	NA	NA	NA	NA	NA	NA	NA	NA	NA	NA	NA	NA	NA	NA	NA	NA	-0.958873	NA	NA
BMDM-specific	ENSMUSG00000103847.1	Gm20056	chr16	32408536	32409054	HAVANA	+	processed_pseudogene	NA	NA	NA	NA	NA	NA	NA	NA	NA	NA	NA	NA	NA	NA	NA	NA	NA	NA	NA	1.24075	NA	NA
BMDM-specific	ENSMUSG00000027715.9	Ccna2	chr3	36564865	36572150	HAVANA	-	protein_coding	NA	NA	NA	NA	NA	NA	NA	NA	NA	NA	NA	NA	NA	NA	NA	NA	NA	NA	NA	-1.30089	NA	-1.41763
BMDM-specific	ENSMUSG00000037664.13	Cdkn1c	chr7	143458339	143461050	HAVANA	-	protein_coding	NA	NA	NA	NA	NA	NA	NA	NA	NA	-1.86726	NA	NA	NA	NA	NA	NA	NA	NA	NA	-1.03076	NA	NA
Kupffer-specific sex-dependent	ENSMUSG00000032679.12	Cd59a	chr2	104095801	104115354	HAVANA	+	protein_coding	-1.06364	NA	-1.06606	NA	-1.35796	NA	NA	NA	NA	NA	NA	NA	NA	NA	NA	NA	NA	NA	-2.05226	-1.22804	-1.95314	-1.26245
Kupffer-specific sex-dependent	ENSMUSG00000027777.15	Schip1	chr3	68064802	68626481	HAVANA	+	protein_coding	NA	2.71603	NA	NA	NA	NA	NA	NA	NA	NA	NA	NA	NA	NA	NA	NA	NA	NA	-1.13804	NA	NA	NA
Kupffer-specific sex-dependent	ENSMUSG00000048376.6	F2r	chr13	95601803	95618487	HAVANA	-	protein_coding	NA	2.64614	NA	NA	NA	NA	NA	NA	NA	NA	NA	NA	NA	NA	NA	NA	NA	NA	-1.22091	NA	-1.22818	NA
Kupffer-specific sex-dependent	ENSMUSG00000035373.2	Ccl7	chr11	82045712	82047525	HAVANA	+	protein_coding	NA	2.77385	NA	NA	NA	NA	NA	NA	NA	NA	NA	NA	NA	NA	NA	NA	NA	NA	NA	NA	NA	NA
Kupffer-specific sex-dependent	ENSMUSG00000006205.13	Htra1	chr7	130936111	130985660	HAVANA	+	protein_coding	NA	1.29976	NA	NA	NA	NA	NA	NA	NA	NA	NA	NA	NA	NA	NA	NA	NA	NA	-1.36043	NA	-1.19142	-0.988786
Kupffer-specific sex-dependent	ENSMUSG00000034664.13	Itga2b	chr11	102453297	102470122	HAVANA	-	protein_coding	NA	2.36491	NA	2.91214	NA	NA	NA	NA	NA	NA	NA	NA	NA	NA	NA	NA	NA	NA	NA	NA	NA	NA
Kupffer-specific sex-dependent	ENSMUSG00000031502.11	Col4a1	chr8	11198423	11312826	HAVANA	-	protein_coding	NA	2.47449	NA	NA	NA	NA	NA	NA	NA	NA	NA	NA	NA	NA	NA	NA	NA	NA	NA	NA	NA	NA
Kupffer-specific sex-dependent	ENSMUSG00000031078.15	Cttn	chr7	144435733	144471009	HAVANA	-	protein_coding	NA	NA	NA	NA	NA	NA	1.43198	1.05883	1.01397	NA	1.03547	NA	NA	NA	NA	NA	NA	NA	-1.2416	-0.94665	-1.28664	NA
Kupffer-specific sex-dependent	ENSMUSG00000024044.16	Epb41l3	chr17	69156810	69289989	HAVANA	+	protein_coding	NA	NA	NA	NA	NA	NA	-2.00917	-1.51161	-1.65997	NA	-2.49951	-1.77051	NA	NA	NA	NA	NA	NA	NA	NA	NA	NA
Kupffer-specific sex-dependent	ENSMUSG00000105338.1	Gm43802	chr3	142547882	142548518	HAVANA	+	processed_pseudogene	NA	NA	NA	NA	NA	NA	7.54949	NA	NA	NA	NA	NA	NA	NA	NA	NA	NA	NA	NA	NA	-8.02177	NA
Kupffer-specific sex-dependent	ENSMUSG00000094915.1	AC168977.2	GL456212.1	31967	34932	ENSEMBL	-	protein_coding	NA	NA	NA	NA	NA	NA	6.36599	4.01544	NA	NA	NA	3.07887	NA	NA	NA	NA	NA	NA	NA	NA	NA	NA
Kupffer-specific sex-dependent	ENSMUSG00000036158.12	Prickle1	chr15	93499114	93595891	HAVANA	-	protein_coding	NA	NA	NA	NA	NA	NA	-2.02725	NA	-1.92291	NA	-1.77161	NA	NA	NA	NA	NA	NA	NA	NA	NA	NA	NA
Kupffer-specific sex-dependent	ENSMUSG00000053062.15	Jam2	chr16	84774123	84825928	HAVANA	+	protein_coding	NA	NA	NA	NA	NA	NA	1.17905	1.10101	NA	NA	NA	NA	NA	NA	NA	NA	NA	NA	NA	NA	NA	NA
Kupffer-specific sex-dependent	ENSMUSG00000032261.16	Sh3bgrl2	chr9	83548327	83638801	HAVANA	+	protein_coding	NA	NA	NA	NA	NA	NA	-2.08227	NA	-2.05684	NA	-2.14603	NA	NA	NA	NA	NA	NA	NA	NA	NA	NA	NA
Kupffer-specific sex-dependent	ENSMUSG00000035299.16	Mid1	chrX	169685199	170005736	HAVANA	+	protein_coding	NA	NA	NA	NA	NA	NA	3.2347	2.86791	3.71516	NA	3.93243	NA	NA	NA	NA	NA	NA	NA	NA	NA	NA	NA
Kupffer-specific sex-dependent	ENSMUSG00000020363.6	Gfpt2	chr11	49794178	49838613	HAVANA	+	protein_coding	NA	NA	NA	NA	NA	NA	1.79141	1.52007	1.50945	NA	NA	NA	NA	NA	NA	NA	NA	NA	NA	NA	NA	NA
Kupffer-specific sex-dependent	ENSMUSG00000029581.14	Fscn1	chr5	142960343	142973185	HAVANA	+	protein_coding	NA	NA	NA	NA	NA	NA	-1.69113	-2.31655	NA	NA	NA	NA	NA	NA	NA	NA	NA	NA	NA	NA	NA	NA
Kupffer-specific sex-dependent	ENSMUSG00000062995.12	Ica1	chr6	8630527	8778488	HAVANA	-	protein_coding	NA	NA	NA	NA	NA	NA	-1.74854	-2.09473	NA	NA	NA	NA	NA	NA	NA	NA	NA	NA	NA	NA	NA	NA
Kupffer-specific sex-dependent	ENSMUSG00000024371.14	C2	chr17	34862604	34898265	HAVANA	-	protein_coding	NA	NA	NA	NA	NA	NA	-2.12449	-3.25489	-2.47416	-3.54882	-3.02239	-3.30714	NA	NA	NA	NA	NA	NA	NA	NA	NA	NA
Kupffer-specific sex-dependent	ENSMUSG00000038188.17	Scarf1	chr11	75513540	75526582	HAVANA	+	protein_coding	NA	NA	NA	NA	NA	NA	0.928133	1.00186	NA	1.26087	NA	1.22454	NA	NA	NA	NA	NA	NA	NA	NA	NA	NA
Kupffer-specific sex-dependent	ENSMUSG00000039693.11	Msantd3	chr4	48539935	48561919	HAVANA	+	protein_coding	NA	NA	NA	NA	NA	NA	NA	2.16028	NA	1.35902	NA	1.42189	NA	NA	NA	NA	NA	NA	NA	NA	NA	NA
Kupffer-specific sex-dependent	ENSMUSG00000026399.12	Cd55	chr1	130439027	130462744	HAVANA	-	protein_coding	NA	NA	NA	NA	NA	NA	NA	3.45163	2.0707	3.86202	2.19728	3.31588	NA	NA	NA	NA	NA	NA	-1.80272	NA	-1.61712	NA
Kupffer-specific sex-dependent	ENSMUSG00000039196.2	Orm1	chr4	63344560	63348163	HAVANA	+	protein_coding	NA	NA	NA	NA	NA	NA	NA	2.92039	NA	2.06059	NA	2.83529	NA	NA	NA	NA	NA	NA	NA	NA	NA	NA
Kupffer-specific sex-dependent	ENSMUSG00000028717.12	Tal1	chr4	115056426	115071755	HAVANA	+	protein_coding	NA	NA	NA	NA	NA	NA	NA	-1.16647	NA	NA	-1.14562	NA	NA	NA	NA	NA	NA	NA	NA	NA	NA	NA
Kupffer-specific sex-dependent	ENSMUSG00000034205.16	Loxl2	chr14	69609068	69695834	HAVANA	+	protein_coding	NA	NA	NA	NA	NA	NA	NA	2.48126	NA	NA	NA	NA	-1.29505	-1.66929	-1.27067	-1.98761	-1.44643	-2.00825	-1.37091	-1.0805	-1.37012	-0.95848
Kupffer-specific sex-dependent	ENSMUSG00000051748.2	Wfdc21	chr11	83746940	83752642	HAVANA	+	protein_coding	NA	NA	NA	NA	NA	NA	NA	6.05144	NA	4.28832	NA	4.04709	NA	NA	NA	NA	NA	NA	NA	NA	NA	NA
Kupffer-specific sex-dependent	ENSMUSG00000018378.13	Cuedc1	chr11	88098058	88194140	HAVANA	+	protein_coding	NA	NA	NA	NA	NA	NA	NA	-1.50921	NA	NA	NA	-1.63711	NA	NA	NA	NA	NA	NA	NA	NA	NA	NA
Kupffer-specific sex-dependent	ENSMUSG00000029287.14	Tgfbr3	chr5	107106570	107289629	HAVANA	-	protein_coding	NA	NA	NA	NA	NA	NA	NA	1.16797	NA	NA	NA	1.33204	NA	NA	NA	NA	NA	NA	-1.47616	NA	-1.78867	NA
Kupffer-specific sex-dependent	ENSMUSG00000004359.16	Spic	chr10	88674772	88685015	HAVANA	-	protein_coding	NA	NA	NA	NA	NA	NA	NA	2.94717	NA	NA	NA	NA	NA	NA	NA	NA	NA	NA	1.51113	NA	NA	NA
Kupffer-specific sex-dependent	ENSMUSG00000027859.10	Ngf	chr3	102469919	102521013	HAVANA	+	protein_coding	NA	NA	NA	NA	NA	NA	NA	4.3415	5.5702	4.52799	5.79666	4.66782	NA	NA	NA	NA	NA	NA	-0.991262	NA	NA	NA
Kupffer-specific sex-dependent	ENSMUSG00000027347.18	Rasgrp1	chr2	117279993	117343001	HAVANA	-	protein_coding	NA	NA	NA	NA	NA	NA	NA	1.22349	NA	NA	NA	NA	NA	NA	NA	NA	NA	NA	NA	NA	NA	NA
Kupffer-specific sex-dependent	ENSMUSG00000024451.8	Arap3	chr18	37972624	37997574	ENSEMBL	-	protein_coding	NA	NA	NA	NA	NA	NA	NA	-1.11114	NA	NA	NA	NA	NA	NA	NA	NA	NA	NA	NA	NA	NA	NA
Kupffer-specific sex-dependent	ENSMUSG00000027002.13	Nckap1	chr2	80500512	80581380	HAVANA	-	protein_coding	NA	NA	NA	NA	NA	NA	NA	1.0278	NA	1.11277	NA	1.21932	NA	NA	NA	NA	NA	NA	NA	NA	NA	NA
Kupffer-specific sex-dependent	ENSMUSG00000032766.9	Gng11	chr6	4003904	4008445	HAVANA	+	protein_coding	NA	NA	NA	NA	NA	NA	NA	1.03566	NA	NA	NA	NA	NA	NA	NA	NA	NA	NA	NA	NA	NA	NA
Kupffer-specific sex-dependent	ENSMUSG00000064262.7	Gimap8	chr6	48647234	48660875	HAVANA	+	protein_coding	NA	NA	NA	NA	NA	NA	NA	2.27884	NA	NA	NA	NA	NA	NA	NA	NA	NA	NA	NA	NA	NA	NA
Kupffer-specific sex-dependent	ENSMUSG00000022122.14	Ednrb	chr14	103814625	103844173	ENSEMBL	-	protein_coding	NA	NA	NA	NA	NA	NA	NA	NA	NA	NA	NA	NA	-1.63611	NA	-1.61265	NA	-1.29415	NA	-1.56296	NA	-1.02657	NA
Kupffer-specific sex-dependent	ENSMUSG00000024043.13	Arhgap28	chr17	67842713	68004120	HAVANA	-	protein_coding	NA	NA	NA	NA	NA	NA	NA	NA	NA	NA	NA	NA	-1.44452	-1.86009	-1.17818	-1.22255	-1.68889	-1.27781	-1.14548	NA	-1.29456	NA
Kupffer-specific sex-dependent	ENSMUSG00000034145.14	Tmem63c	chr12	87021340	87090043	HAVANA	+	protein_coding	NA	NA	NA	NA	NA	NA	NA	NA	NA	NA	NA	NA	2.73125	NA	3.07997	NA	2.64611	NA	NA	NA	NA	NA
Kupffer-specific sex-dependent	ENSMUSG00000055421.8	Pcdh9	chr14	93013410	93890679	HAVANA	-	protein_coding	NA	NA	NA	NA	NA	NA	NA	NA	NA	NA	NA	NA	1.32093	NA	1.54261	NA	1.33283	NA	NA	NA	NA	NA
Kupffer-specific sex-dependent	ENSMUSG00000055301.8	Adh7	chr3	138217760	138233382	HAVANA	+	protein_coding	NA	NA	NA	NA	NA	NA	NA	NA	-2.02707	NA	NA	NA	NA	-1.49289	NA	-1.54395	NA	-1.60598	NA	NA	NA	NA
Kupffer-specific sex-dependent	ENSMUSG00000032340.8	Neo1	chr9	58874687	59036441	HAVANA	-	protein_coding	NA	NA	NA	NA	NA	NA	NA	NA	NA	NA	NA	NA	NA	-1.30188	NA	-1.30824	NA	-1.28161	NA	NA	NA	NA
Kupffer-specific sex-dependent	ENSMUSG00000053080.10	2700081O15Rik	chr19	7417625	7425904	HAVANA	+	protein_coding	NA	NA	NA	NA	NA	NA	NA	NA	NA	NA	NA	NA	NA	-0.833128	NA	NA	NA	NA	NA	NA	NA	NA
Kupffer-specific sex-dependent	ENSMUSG00000000182.9	Fgf23	chr6	127072902	127081408	HAVANA	+	protein_coding	NA	NA	NA	NA	NA	NA	NA	NA	NA	NA	NA	NA	NA	-2.88839	NA	NA	NA	NA	NA	NA	NA	NA
Kupffer-specific sex-dependent	ENSMUSG00000073409.12	H2-Q6	chr17	35424850	35430055	HAVANA	+	protein_coding	NA	NA	NA	NA	NA	NA	NA	NA	NA	NA	NA	NA	NA	NA	NA	NA	NA	NA	1.35575	1.51042	0.833485	1.11588
Kupffer-specific sex-dependent	ENSMUSG00000029380.11	Cxcl1	chr5	90891241	90893115	HAVANA	+	protein_coding	NA	NA	NA	NA	NA	NA	NA	NA	NA	NA	NA	NA	NA	NA	NA	NA	NA	NA	-1.97559	-1.27575	-1.43413	-1.18068
Kupffer-specific sex-dependent	ENSMUSG00000039004.5	Bmp6	chr13	38345716	38499728	ENSEMBL	+	protein_coding	NA	NA	NA	NA	NA	NA	NA	NA	NA	NA	NA	NA	NA	NA	NA	NA	NA	NA	-2.15234	NA	-1.87442	-1.07956
Kupffer-specific sex-dependent	ENSMUSG00000035413.8	Tmem98	chr11	80810175	80822033	HAVANA	+	protein_coding	NA	NA	NA	NA	NA	NA	NA	NA	NA	NA	NA	NA	NA	NA	NA	NA	NA	NA	-1.86845	-0.934828	-1.73533	-1.23208
Kupffer-specific sex-dependent	ENSMUSG00000050953.10	Gja1	chr10	56377330	56402513	HAVANA	+	protein_coding	NA	NA	NA	NA	NA	NA	NA	NA	NA	NA	NA	NA	NA	NA	NA	NA	NA	NA	-2.04681	-1.14404	-1.82378	NA
Kupffer-specific sex-dependent	ENSMUSG00000068036.14	Afdn	chr17	13760539	13906150	HAVANA	+	protein_coding	NA	NA	NA	NA	NA	NA	NA	NA	NA	NA	NA	NA	NA	NA	NA	NA	NA	NA	0.955861	0.819677	0.852811	NA
Kupffer-specific sex-dependent	ENSMUSG00000026421.14	Csrp1	chr1	135720061	135752232	HAVANA	+	protein_coding	NA	NA	NA	NA	NA	NA	NA	NA	NA	NA	NA	NA	NA	NA	NA	NA	NA	NA	-1.16539	NA	-1.0786	NA
Kupffer-specific sex-dependent	ENSMUSG00000021379.1	Id4	chr13	48261427	48264036	ENSEMBL	+	protein_coding	NA	NA	NA	NA	NA	NA	NA	NA	NA	NA	NA	NA	NA	NA	NA	NA	NA	NA	-2.15159	-1.86169	-1.77417	NA
Kupffer-specific sex-dependent	ENSMUSG00000006356.10	Crip2	chr12	113140236	113145506	HAVANA	+	protein_coding	NA	NA	NA	NA	NA	NA	NA	NA	NA	NA	NA	NA	NA	NA	NA	NA	NA	NA	-1.05583	NA	-1.00781	NA
Kupffer-specific sex-dependent	ENSMUSG00000031209.14	Heph	chrX	96455359	96574485	HAVANA	+	protein_coding	NA	NA	NA	NA	NA	NA	NA	NA	NA	NA	NA	NA	NA	NA	NA	NA	NA	NA	-1.94438	-1.64634	-2.07554	-1.55106
Kupffer-specific sex-dependent	ENSMUSG00000028634.16	Hivep3	chr4	119733784	120138045	HAVANA	+	protein_coding	NA	NA	NA	NA	NA	NA	NA	NA	NA	NA	NA	NA	NA	NA	NA	NA	NA	NA	1.18197	NA	NA	NA
Kupffer-specific sex-dependent	ENSMUSG00000030352.14	Tspan9	chr6	127961396	128143594	HAVANA	-	protein_coding	NA	NA	NA	NA	NA	NA	NA	NA	NA	NA	NA	NA	NA	NA	NA	NA	NA	NA	-1.06339	NA	-1.05888	-0.829722
Kupffer-specific sex-dependent	ENSMUSG00000063558.4	Aox1	chr1	58029931	58106413	HAVANA	+	protein_coding	NA	NA	NA	NA	NA	NA	NA	NA	NA	NA	NA	NA	NA	NA	NA	NA	NA	NA	-1.31806	NA	-1.60259	-0.842811
Kupffer-specific sex-dependent	ENSMUSG00000028402.18	Mpdz	chr4	81278500	81442815	HAVANA	-	protein_coding	NA	NA	NA	NA	NA	NA	NA	NA	NA	NA	NA	NA	NA	NA	NA	NA	NA	NA	-1.74135	-1.03057	-1.73827	-1.12641
Kupffer-specific sex-dependent	ENSMUSG00000018593.13	Sparc	chr11	55394500	55423183	HAVANA	-	protein_coding	NA	NA	NA	NA	NA	NA	NA	NA	NA	NA	NA	NA	NA	NA	NA	NA	NA	NA	-1.44109	-0.985541	-1.48711	-0.932077
Kupffer-specific sex-dependent	ENSMUSG00000019256.17	Ahr	chr12	35497974	35535038	HAVANA	-	protein_coding	NA	NA	NA	NA	NA	NA	NA	NA	NA	NA	NA	NA	NA	NA	NA	NA	NA	NA	-0.991666	-0.867913	NA	-0.827215
Kupffer-specific sex-dependent	ENSMUSG00000022994.8	Adcy6	chr15	98589994	98607633	ENSEMBL	-	protein_coding	NA	NA	NA	NA	NA	NA	NA	NA	NA	NA	NA	NA	NA	NA	NA	NA	NA	NA	-1.14987	-1.0843	-1.3606	-1.21427
Kupffer-specific sex-dependent	ENSMUSG00000026463.17	Atp2b4	chr1	133699457	133801041	HAVANA	-	protein_coding	NA	NA	NA	NA	NA	NA	NA	NA	NA	NA	NA	NA	NA	NA	NA	NA	NA	NA	-1.42741	-1.45648	-1.65463	-1.36706
Kupffer-specific sex-dependent	ENSMUSG00000021838.16	Samd4	chr14	46882854	47105817	HAVANA	+	protein_coding	NA	NA	NA	NA	NA	NA	NA	NA	NA	NA	NA	NA	NA	NA	NA	NA	NA	NA	-1.2946	-1.17025	-1.35285	-1.01305
Kupffer-specific sex-dependent	ENSMUSG00000021782.14	Dlg5	chr14	24133953	24245920	HAVANA	-	protein_coding	NA	NA	NA	NA	NA	NA	NA	NA	NA	NA	NA	NA	NA	NA	NA	NA	NA	NA	1.17084	0.928075	1.07561	NA
Kupffer-specific sex-dependent	ENSMUSG00000020019.4	Ntn4	chr10	93640681	93747207	HAVANA	+	protein_coding	NA	NA	NA	NA	NA	NA	NA	NA	NA	NA	NA	NA	NA	NA	NA	NA	NA	NA	-2.20868	-1.39926	-2.20039	-1.49042
Kupffer-specific sex-dependent	ENSMUSG00000047632.10	Fgfbp3	chr19	36917550	36919615	HAVANA	-	protein_coding	NA	NA	NA	NA	NA	NA	NA	NA	NA	NA	NA	NA	NA	NA	NA	NA	NA	NA	1.24622	1.06152	1.25802	NA
Kupffer-specific sex-dependent	ENSMUSG00000024462.17	Gabbr1	chr17	37045966	37075067	HAVANA	+	protein_coding	NA	NA	NA	NA	NA	NA	NA	NA	NA	NA	NA	NA	NA	NA	NA	NA	NA	NA	-1.1785	NA	-0.915157	NA
Kupffer-specific sex-dependent	ENSMUSG00000033542.13	Arhgef5	chr6	43265582	43289320	HAVANA	+	protein_coding	NA	NA	NA	NA	NA	NA	NA	NA	NA	NA	NA	NA	NA	NA	NA	NA	NA	NA	-0.93921	NA	-1.19998	-0.912978
Kupffer-specific sex-dependent	ENSMUSG00000003948.17	Mmd	chr11	90249456	90278589	HAVANA	+	protein_coding	NA	NA	NA	NA	NA	NA	NA	NA	NA	NA	NA	NA	NA	NA	NA	NA	NA	NA	-1.29167	NA	-1.36933	NA
Kupffer-specific sex-dependent	ENSMUSG00000031523.16	Dlc1	chr8	36567751	36953143	HAVANA	-	protein_coding	NA	NA	NA	NA	NA	NA	NA	NA	NA	NA	NA	NA	NA	NA	NA	NA	NA	NA	-1.25025	NA	NA	NA
Kupffer-specific sex-dependent	ENSMUSG00000038305.14	Spats2l	chr1	57774162	57948394	HAVANA	+	protein_coding	NA	NA	NA	NA	NA	NA	NA	NA	NA	NA	NA	NA	NA	NA	NA	NA	NA	NA	-1.93115	NA	-1.69662	NA
Kupffer-specific sex-dependent	ENSMUSG00000020176.17	Grb10	chr11	11930508	12038683	HAVANA	-	protein_coding	NA	NA	NA	NA	NA	NA	NA	NA	NA	NA	NA	NA	NA	NA	NA	NA	NA	NA	-1.15276	-1.0171	-1.13854	-0.982705
Kupffer-specific sex-dependent	ENSMUSG00000052914.4	Cyp2j6	chr4	96516138	96553661	HAVANA	-	protein_coding	NA	NA	NA	NA	NA	NA	NA	NA	NA	NA	NA	NA	NA	NA	NA	NA	NA	NA	-1.58279	-1.17782	-1.18803	NA
Kupffer-specific sex-dependent	ENSMUSG00000031434.15	Morc4	chrX	139821632	139871677	HAVANA	-	protein_coding	NA	NA	NA	NA	NA	NA	NA	NA	NA	NA	NA	NA	NA	NA	NA	NA	NA	NA	-1.59006	-1.13803	-1.51162	NA
Kupffer-specific sex-dependent	ENSMUSG00000015094.16	Npdc1	chr2	25399351	25409494	HAVANA	+	protein_coding	NA	NA	NA	NA	NA	NA	NA	NA	NA	NA	NA	NA	NA	NA	NA	NA	NA	NA	-1.36276	NA	-1.394	NA
Kupffer-specific sex-dependent	ENSMUSG00000051236.13	Msrb3	chr10	120781096	120899101	HAVANA	-	protein_coding	NA	NA	NA	NA	NA	NA	NA	NA	NA	NA	NA	NA	NA	NA	NA	NA	NA	NA	-1.34964	-1.03003	-1.55933	NA
Kupffer-specific sex-dependent	ENSMUSG00000005973.6	Rcn1	chr2	105386291	105399319	HAVANA	-	protein_coding	NA	NA	NA	NA	NA	NA	NA	NA	NA	NA	NA	NA	NA	NA	NA	NA	NA	NA	-1.12677	-0.840137	-1.08287	NA
Kupffer-specific sex-dependent	ENSMUSG00000050910.5	Cdr2l	chr11	115381916	115396132	HAVANA	+	protein_coding	NA	NA	NA	NA	NA	NA	NA	NA	NA	NA	NA	NA	NA	NA	NA	NA	NA	NA	-1.40012	-1.09132	NA	NA
Kupffer-specific sex-dependent	ENSMUSG00000032216.14	Nedd4	chr9	72662346	72749852	HAVANA	+	protein_coding	NA	NA	NA	NA	NA	NA	NA	NA	NA	NA	NA	NA	NA	NA	NA	NA	NA	NA	-1.28378	-1.00214	-1.37266	-0.950231
Kupffer-specific sex-dependent	ENSMUSG00000030796.17	Tead2	chr7	45215753	45233644	HAVANA	+	protein_coding	NA	NA	NA	NA	NA	NA	NA	NA	NA	NA	NA	NA	NA	NA	NA	NA	NA	NA	-1.16432	NA	-1.35883	NA
Kupffer-specific sex-dependent	ENSMUSG00000031955.10	Bcar1	chr8	111710474	111743809	HAVANA	-	protein_coding	NA	NA	NA	NA	NA	NA	NA	NA	NA	NA	NA	NA	NA	NA	NA	NA	NA	NA	-0.927728	NA	-0.951703	-0.833281
Kupffer-specific sex-dependent	ENSMUSG00000057722.17	Lepr	chr4	101717404	101815352	HAVANA	+	protein_coding	NA	NA	NA	NA	NA	NA	NA	NA	NA	NA	NA	NA	NA	NA	NA	NA	NA	NA	-1.46916	NA	-1.60583	NA
Kupffer-specific sex-dependent	ENSMUSG00000030465.19	Psd3	chr8	67689082	68212027	HAVANA	-	protein_coding	NA	NA	NA	NA	NA	NA	NA	NA	NA	NA	NA	NA	NA	NA	NA	NA	NA	NA	-1.41229	NA	-1.59782	NA
Kupffer-specific sex-dependent	ENSMUSG00000028194.15	Ddah1	chr3	145758675	145894277	HAVANA	+	protein_coding	NA	NA	NA	NA	NA	NA	NA	NA	NA	NA	NA	NA	NA	NA	NA	NA	NA	NA	-1.21577	-1.12853	-1.19981	NA
Kupffer-specific sex-dependent	ENSMUSG00000049791.4	Fzd4	chr7	89404355	89413134	HAVANA	+	protein_coding	NA	NA	NA	NA	NA	NA	NA	NA	NA	NA	NA	NA	NA	NA	NA	NA	NA	NA	-1.51364	NA	-1.95715	NA
Kupffer-specific sex-dependent	ENSMUSG00000020186.7	Csrp2	chr10	110919789	110939622	HAVANA	+	protein_coding	NA	NA	NA	NA	NA	NA	NA	NA	NA	NA	NA	NA	NA	NA	NA	-0.929318	NA	NA	-0.925364	-0.860091	NA	NA
Kupffer-specific sex-dependent	ENSMUSG00000033149.16	Phldb2	chr16	45746243	45953598	HAVANA	-	protein_coding	NA	NA	NA	NA	NA	NA	NA	NA	NA	NA	NA	NA	NA	NA	NA	NA	NA	NA	-1.12831	-0.96041	-1.29069	-0.964703
Kupffer-specific sex-dependent	ENSMUSG00000030782.16	Tgfb1i1	chr7	128246812	128255699	HAVANA	+	protein_coding	NA	NA	NA	NA	NA	NA	NA	NA	NA	NA	NA	NA	NA	NA	NA	NA	NA	NA	-1.28572	NA	-1.02759	NA
Kupffer-specific sex-dependent	ENSMUSG00000020315.18	Sptbn1	chr11	30099395	30268175	HAVANA	-	protein_coding	NA	NA	NA	NA	NA	NA	NA	NA	NA	NA	NA	NA	NA	NA	NA	NA	NA	NA	-0.933752	NA	-1.0518	NA
Kupffer-specific sex-dependent	ENSMUSG00000017144.8	Rnd3	chr2	51130438	51149111	HAVANA	-	protein_coding	NA	NA	NA	NA	NA	NA	NA	NA	NA	NA	NA	NA	NA	NA	NA	NA	NA	NA	-1.43907	NA	NA	NA
Kupffer-specific sex-dependent	ENSMUSG00000054843.8	Atrnl1	chr19	57611034	58133338	ENSEMBL	+	protein_coding	NA	NA	NA	NA	NA	NA	NA	NA	NA	NA	NA	NA	NA	NA	NA	NA	NA	NA	-0.973463	NA	-1.03424	NA
Kupffer-specific sex-dependent	ENSMUSG00000034675.17	Dbn1	chr13	55473429	55488111	HAVANA	-	protein_coding	NA	NA	NA	NA	NA	NA	NA	NA	NA	NA	NA	NA	NA	NA	NA	NA	NA	NA	-1.20897	-1.19174	-1.0203	NA
Kupffer-specific sex-dependent	ENSMUSG00000036256.13	Igfbp7	chr5	77349240	77408041	HAVANA	-	protein_coding	NA	NA	NA	NA	NA	NA	NA	NA	NA	NA	NA	NA	NA	NA	NA	NA	NA	NA	-1.27843	NA	-1.19143	NA
Kupffer-specific sex-dependent	ENSMUSG00000074876.5	Spata5l1	chr2	122630625	122632930	HAVANA	+	processed_transcript	NA	NA	NA	NA	NA	NA	NA	NA	NA	NA	NA	NA	NA	NA	NA	NA	NA	NA	1.03834	NA	1.06614	NA
Kupffer-specific sex-dependent	ENSMUSG00000019997.11	Ctgf	chr10	24595442	24598683	HAVANA	+	protein_coding	NA	NA	NA	NA	NA	NA	NA	NA	NA	NA	NA	NA	NA	NA	NA	NA	NA	NA	-1.28999	NA	-1.17346	NA
Kupffer-specific sex-dependent	ENSMUSG00000027962.14	Vcam1	chr3	116109949	116129688	HAVANA	-	protein_coding	NA	NA	NA	NA	NA	NA	NA	NA	NA	NA	NA	NA	NA	NA	NA	NA	NA	NA	-1.21304	NA	-1.18566	NA
Kupffer-specific sex-dependent	ENSMUSG00000020282.18	Rhbdf1	chr11	32209585	32222300	HAVANA	-	protein_coding	NA	NA	NA	NA	NA	NA	NA	NA	NA	NA	NA	NA	NA	NA	NA	NA	NA	NA	-0.822097	NA	NA	-0.89564
Kupffer-specific sex-dependent	ENSMUSG00000053931.11	Cnn3	chr3	121426497	121458207	HAVANA	+	protein_coding	NA	NA	NA	NA	NA	NA	NA	NA	NA	NA	NA	NA	NA	NA	NA	NA	NA	NA	-1.16796	-0.970419	-1.20593	NA
Kupffer-specific sex-dependent	ENSMUSG00000023036.14	Pcdhgc4	chr18	37815079	37841873	HAVANA	+	protein_coding	NA	NA	NA	NA	NA	NA	NA	NA	NA	NA	NA	NA	NA	NA	NA	NA	NA	NA	-3.53064	NA	-4.77411	NA
Kupffer-specific sex-dependent	ENSMUSG00000045838.8	A430105I19Rik	chr2	118754158	118762661	HAVANA	-	protein_coding	NA	NA	NA	NA	NA	NA	NA	NA	NA	NA	NA	NA	NA	NA	NA	NA	NA	NA	-1.37236	NA	NA	NA
Kupffer-specific sex-dependent	ENSMUSG00000002980.14	Bcam	chr7	19756131	19771016	HAVANA	-	protein_coding	NA	NA	NA	NA	NA	NA	NA	NA	NA	NA	NA	NA	NA	NA	NA	NA	NA	NA	-1.36665	NA	-1.7667	NA
Kupffer-specific sex-dependent	ENSMUSG00000053110.13	Yap1	chr9	7931999	8004596	HAVANA	-	protein_coding	NA	NA	NA	NA	NA	NA	NA	NA	NA	NA	NA	NA	NA	NA	NA	NA	NA	NA	-1.38754	NA	-1.42331	NA
Kupffer-specific sex-dependent	ENSMUSG00000031480.15	Thsd1	chr8	22227313	22261334	HAVANA	+	protein_coding	NA	NA	NA	NA	NA	NA	NA	NA	NA	NA	NA	NA	NA	NA	NA	NA	NA	NA	-1.13637	-0.934322	-1.32931	NA
Kupffer-specific sex-dependent	ENSMUSG00000033460.14	Armcx1	chrX	134717963	134721917	HAVANA	+	protein_coding	NA	NA	NA	NA	NA	NA	NA	NA	NA	NA	NA	NA	NA	NA	NA	NA	NA	NA	-0.980687	NA	-0.919681	NA
Kupffer-specific sex-dependent	ENSMUSG00000041845.10	Rhod	chr19	4425459	4439432	HAVANA	-	protein_coding	NA	NA	NA	NA	NA	NA	NA	NA	NA	NA	NA	NA	NA	NA	NA	NA	NA	NA	-1.25482	NA	-1.27496	NA
Kupffer-specific sex-dependent	ENSMUSG00000051855.15	Mest	chr6	30723547	30748465	HAVANA	+	protein_coding	NA	NA	NA	NA	NA	NA	NA	NA	NA	NA	NA	NA	NA	NA	NA	NA	NA	NA	-1.3506	NA	-1.43817	NA
Kupffer-specific sex-dependent	ENSMUSG00000025006.15	Sorbs1	chr19	40295049	40402267	ENSEMBL	-	protein_coding	NA	NA	NA	NA	NA	NA	NA	NA	NA	NA	NA	NA	NA	NA	NA	NA	NA	NA	-0.959663	NA	-0.864426	NA
Kupffer-specific sex-dependent	ENSMUSG00000038729.23	Akap2	chr4	57717657	57896984	HAVANA	+	protein_coding	NA	NA	NA	NA	NA	NA	NA	NA	NA	NA	NA	NA	NA	NA	NA	NA	NA	NA	-1.38967	NA	-1.34726	NA
Kupffer-specific sex-dependent	ENSMUSG00000019577.6	Pdk4	chr6	5483351	5496309	HAVANA	-	protein_coding	NA	NA	NA	NA	NA	NA	NA	NA	NA	NA	NA	NA	NA	NA	NA	NA	NA	NA	-0.942273	NA	NA	NA
Kupffer-specific sex-dependent	ENSMUSG00000073490.11	Ifi207	chr1	173723427	173741747	HAVANA	-	protein_coding	NA	NA	NA	NA	NA	NA	NA	NA	NA	NA	NA	NA	NA	NA	NA	NA	NA	NA	0.879295	NA	NA	NA
Kupffer-specific sex-dependent	ENSMUSG00000023348.11	Trip6	chr5	137309654	137314404	HAVANA	-	protein_coding	NA	NA	NA	NA	NA	NA	NA	NA	NA	NA	NA	NA	NA	NA	NA	NA	NA	NA	-0.966945	NA	-1.14322	NA
Kupffer-specific sex-dependent	ENSMUSG00000036745.15	Ttll7	chr3	146852367	146984009	HAVANA	+	protein_coding	NA	NA	NA	NA	NA	NA	NA	NA	NA	NA	NA	NA	NA	NA	NA	NA	NA	NA	-0.999918	NA	-1.10576	NA
Kupffer-specific sex-dependent	ENSMUSG00000036356.15	Csgalnact1	chr8	68356781	68735146	HAVANA	-	protein_coding	NA	NA	NA	NA	NA	NA	NA	NA	NA	NA	NA	NA	NA	NA	NA	NA	NA	NA	-1.62293	NA	-1.91769	NA
Kupffer-specific sex-dependent	ENSMUSG00000004655.5	Aqp1	chr6	55336432	55348555	HAVANA	+	protein_coding	NA	NA	NA	NA	NA	3.79063	NA	NA	NA	NA	NA	NA	NA	NA	NA	NA	NA	NA	-1.85641	NA	-1.67562	NA
Kupffer-specific sex-dependent	ENSMUSG00000034855.13	Cxcl10	chr5	92346638	92348889	HAVANA	-	protein_coding	NA	NA	NA	NA	NA	NA	NA	NA	NA	NA	NA	NA	NA	NA	NA	NA	NA	NA	1.78979	NA	NA	NA
Kupffer-specific sex-dependent	ENSMUSG00000027200.17	Sema6d	chr2	124089969	124667770	HAVANA	+	protein_coding	NA	NA	NA	NA	NA	NA	NA	NA	NA	NA	NA	NA	NA	NA	NA	NA	NA	NA	-1.08342	NA	-0.856554	NA
Kupffer-specific sex-dependent	ENSMUSG00000019891.15	Dcbld1	chr10	52233619	52321378	HAVANA	+	protein_coding	NA	NA	NA	NA	NA	NA	NA	NA	NA	NA	NA	NA	NA	NA	NA	NA	NA	NA	-1.34666	NA	-1.08467	NA
Kupffer-specific sex-dependent	ENSMUSG00000022385.10	Gtse1	chr15	85859707	85876572	ENSEMBL	+	protein_coding	NA	NA	NA	NA	NA	NA	NA	NA	NA	NA	NA	NA	NA	NA	NA	NA	NA	NA	0.907184	NA	NA	NA
Kupffer-specific sex-dependent	ENSMUSG00000030790.15	Adm	chr7	110627661	110629820	HAVANA	+	protein_coding	NA	NA	NA	NA	NA	NA	NA	NA	NA	NA	NA	1.83485	NA	NA	NA	NA	NA	NA	-1.52068	NA	-1.48245	NA
Kupffer-specific sex-dependent	ENSMUSG00000020044.13	Timp3	chr10	86300372	86349506	HAVANA	+	protein_coding	NA	NA	NA	NA	NA	NA	NA	NA	NA	NA	NA	NA	NA	NA	NA	NA	NA	NA	-1.12301	NA	-1.22002	NA
Kupffer-specific sex-dependent	ENSMUSG00000033788.15	Dysf	chr6	84008590	84211060	HAVANA	+	protein_coding	NA	NA	NA	NA	NA	NA	NA	NA	NA	NA	NA	NA	NA	NA	NA	NA	NA	NA	-1.06547	NA	-1.48316	-1.03927
Kupffer-specific sex-dependent	ENSMUSG00000042842.11	Serpinb6b	chr13	32965209	32979067	HAVANA	+	protein_coding	NA	NA	NA	NA	NA	NA	NA	NA	NA	NA	NA	NA	NA	NA	NA	NA	NA	NA	-1.35671	-1.18982	NA	NA
Kupffer-specific sex-dependent	ENSMUSG00000103088.1	Pcdhgb6	chr18	37742094	37841873	HAVANA	+	protein_coding	NA	NA	NA	NA	NA	NA	NA	NA	NA	NA	NA	NA	NA	NA	NA	NA	NA	NA	-0.940933	NA	-0.915636	NA
Kupffer-specific sex-dependent	ENSMUSG00000048960.13	Prex2	chr1	10993465	11303681	HAVANA	+	protein_coding	NA	NA	NA	NA	NA	NA	NA	NA	NA	NA	NA	NA	NA	NA	NA	NA	NA	NA	-0.815032	NA	-1.2451	NA
Kupffer-specific sex-dependent	ENSMUSG00000035183.14	Slc24a5	chr2	125068124	125088677	HAVANA	+	protein_coding	NA	NA	NA	NA	NA	NA	NA	NA	NA	NA	NA	NA	NA	NA	NA	NA	NA	NA	-1.44336	NA	-1.26787	NA
Kupffer-specific sex-dependent	ENSMUSG00000028082.13	Sh3d19	chr3	85971109	86130526	HAVANA	+	protein_coding	NA	NA	NA	NA	NA	NA	NA	NA	NA	NA	NA	NA	NA	NA	NA	NA	NA	NA	-1.31345	NA	-1.47547	NA
Kupffer-specific sex-dependent	ENSMUSG00000069743.4	Zfp820	chr17	21816876	21845759	ENSEMBL	-	protein_coding	NA	NA	NA	NA	NA	NA	NA	NA	NA	NA	NA	NA	NA	NA	NA	NA	NA	NA	-1.13964	-1.07586	-1.32317	NA
Kupffer-specific sex-dependent	ENSMUSG00000037712.15	Fermt2	chr14	45458792	45530118	HAVANA	-	protein_coding	NA	NA	NA	NA	NA	NA	NA	NA	NA	NA	NA	NA	NA	NA	NA	NA	NA	NA	-0.928866	NA	-0.958641	NA
Kupffer-specific sex-dependent	ENSMUSG00000034586.14	Hid1	chr11	115347707	115367756	HAVANA	-	protein_coding	NA	NA	NA	NA	NA	NA	NA	NA	NA	NA	NA	NA	NA	NA	NA	NA	NA	NA	-0.824744	NA	-0.880247	NA
Kupffer-specific sex-dependent	ENSMUSG00000060600.15	Eno3	chr11	70657202	70662513	HAVANA	+	protein_coding	NA	NA	NA	NA	NA	NA	NA	NA	NA	NA	NA	NA	NA	NA	NA	NA	NA	NA	0.970877	NA	0.984926	NA
Kupffer-specific sex-dependent	ENSMUSG00000030409.15	Dmpk	chr7	19083849	19093821	HAVANA	+	protein_coding	NA	NA	NA	NA	NA	NA	NA	NA	NA	NA	NA	NA	NA	NA	NA	NA	NA	NA	-1.87267	NA	-1.67911	NA
Kupffer-specific sex-dependent	ENSMUSG00000103032.1	Gm37121	chr1	62809302	62811857	HAVANA	+	TEC	NA	NA	NA	NA	NA	NA	NA	NA	NA	NA	NA	NA	NA	NA	NA	NA	NA	NA	1.16466	NA	NA	NA
Kupffer-specific sex-dependent	ENSMUSG00000020641.16	Rsad2	chr12	26442746	26456452	HAVANA	-	protein_coding	NA	NA	NA	NA	NA	NA	NA	NA	NA	NA	NA	NA	NA	NA	NA	NA	NA	NA	1.38076	NA	NA	NA
Kupffer-specific sex-dependent	ENSMUSG00000037071.2	Scd1	chr19	44394451	44407709	ENSEMBL	-	protein_coding	NA	NA	NA	NA	NA	NA	NA	NA	NA	NA	NA	NA	NA	NA	NA	NA	NA	NA	-1.31723	NA	-1.52431	NA
Kupffer-specific sex-dependent	ENSMUSG00000062312.5	Erbb2	chr11	98412470	98437716	HAVANA	+	protein_coding	NA	NA	NA	NA	NA	NA	NA	NA	NA	NA	NA	NA	NA	NA	NA	NA	NA	NA	-1.16271	-1.26917	NA	NA
Kupffer-specific sex-dependent	ENSMUSG00000091997.1	Gm6611	chr16	32923218	32924489	HAVANA	+	processed_pseudogene	NA	NA	NA	NA	NA	NA	NA	NA	NA	NA	NA	NA	NA	NA	NA	NA	NA	NA	1.20687	NA	NA	NA
Kupffer-specific sex-dependent	ENSMUSG00000021708.17	Rasgrf2	chr13	91880400	92131656	HAVANA	-	protein_coding	NA	NA	NA	NA	NA	NA	NA	NA	NA	NA	NA	NA	NA	NA	NA	NA	NA	NA	0.905406	1.23932	NA	1.39781
Kupffer-specific sex-dependent	ENSMUSG00000023045.12	Soat2	chr15	102150526	102163474	HAVANA	+	protein_coding	NA	NA	NA	NA	NA	NA	NA	NA	NA	NA	NA	NA	NA	NA	NA	NA	NA	NA	0.941672	NA	NA	NA
Kupffer-specific sex-dependent	ENSMUSG00000073802.4	Cdkn2b	chr4	89306289	89311032	ENSEMBL	-	protein_coding	NA	NA	NA	NA	NA	NA	NA	NA	NA	NA	NA	NA	NA	NA	NA	NA	NA	NA	-1.11231	NA	-1.19187	NA
Kupffer-specific sex-dependent	ENSMUSG00000096201.1	Gm10715	chr9	3036877	3038316	ENSEMBL	+	protein_coding	NA	NA	NA	NA	NA	NA	NA	NA	NA	NA	NA	NA	NA	NA	NA	NA	NA	NA	1.77895	NA	NA	NA
Kupffer-specific sex-dependent	ENSMUSG00000048154.16	Kmt2d	chr15	98831669	98871204	HAVANA	-	protein_coding	NA	NA	NA	NA	NA	NA	NA	NA	NA	NA	NA	NA	NA	NA	NA	NA	NA	NA	1.01935	NA	NA	NA
Kupffer-specific sex-dependent	ENSMUSG00000046546.3	Fam43a	chr16	30599723	30602797	HAVANA	+	protein_coding	NA	NA	NA	NA	NA	NA	NA	NA	NA	NA	NA	NA	NA	NA	NA	NA	NA	NA	-0.817909	NA	NA	NA
Kupffer-specific sex-dependent	ENSMUSG00000024803.8	Ankrd1	chr19	36111965	36119844	ENSEMBL	-	protein_coding	NA	NA	NA	NA	NA	NA	NA	NA	NA	NA	NA	NA	NA	NA	NA	NA	NA	NA	-2.22612	NA	NA	NA
Kupffer-specific sex-dependent	ENSMUSG00000020130.9	Tbc1d15	chr10	115197872	115251467	HAVANA	-	protein_coding	NA	NA	NA	NA	NA	NA	NA	NA	NA	NA	NA	NA	NA	NA	NA	NA	NA	NA	0.875816	NA	NA	NA
Kupffer-specific sex-dependent	ENSMUSG00000049521.1	Cdc42ep1	chr15	78842647	78850902	ENSEMBL	+	protein_coding	NA	NA	NA	NA	NA	NA	NA	NA	NA	NA	NA	NA	NA	NA	NA	NA	NA	NA	-1.00332	NA	NA	NA
Kupffer-specific sex-dependent	ENSMUSG00000030410.16	Dmwd	chr7	19076227	19082776	HAVANA	+	protein_coding	NA	NA	NA	NA	NA	NA	NA	NA	NA	NA	NA	NA	NA	NA	NA	NA	NA	NA	-0.990181	NA	NA	-1.06788
Kupffer-specific sex-dependent	ENSMUSG00000026278.14	Bok	chr1	93685660	93695764	HAVANA	+	protein_coding	NA	NA	NA	NA	NA	NA	NA	NA	NA	NA	NA	NA	NA	NA	NA	NA	NA	NA	-1.29241	NA	NA	NA
Kupffer-specific sex-dependent	ENSMUSG00000032578.7	Cish	chr9	107296026	107302784	HAVANA	+	protein_coding	NA	NA	NA	NA	NA	NA	NA	NA	NA	NA	NA	NA	NA	NA	NA	NA	NA	NA	-1.04319	NA	NA	NA
Kupffer-specific sex-dependent	ENSMUSG00000035095.11	Fam167a	chr14	63436394	63465498	HAVANA	+	protein_coding	NA	NA	NA	NA	NA	NA	NA	NA	NA	NA	NA	NA	NA	NA	NA	NA	NA	NA	-1.01533	NA	-1.05432	NA
Kupffer-specific sex-dependent	ENSMUSG00000074457.10	S100a16	chr3	90537254	90543151	HAVANA	+	protein_coding	NA	NA	NA	NA	NA	NA	NA	NA	NA	NA	NA	NA	NA	NA	NA	NA	NA	NA	-0.863051	NA	NA	NA
Kupffer-specific sex-dependent	ENSMUSG00000042807.15	Hecw2	chr1	53806876	54195168	HAVANA	-	protein_coding	NA	NA	NA	NA	NA	NA	NA	NA	NA	NA	NA	NA	NA	NA	NA	NA	NA	NA	-0.969748	NA	NA	NA
Kupffer-specific sex-dependent	ENSMUSG00000029553.10	Tfec	chr6	16833373	16898441	HAVANA	-	protein_coding	NA	NA	NA	NA	NA	NA	NA	NA	NA	NA	NA	NA	NA	NA	NA	NA	NA	NA	-0.883579	NA	NA	NA
Kupffer-specific sex-dependent	ENSMUSG00000043518.7	Rai2	chrX	161717069	161779496	HAVANA	+	protein_coding	NA	NA	NA	NA	NA	NA	NA	NA	NA	NA	NA	NA	NA	NA	NA	NA	NA	NA	-2.19751	NA	-2.78267	NA
Kupffer-specific sex-dependent	ENSMUSG00000027074.14	Slc43a3	chr2	84936579	84958509	HAVANA	+	protein_coding	NA	NA	NA	NA	NA	NA	NA	NA	NA	NA	NA	NA	NA	NA	NA	NA	NA	NA	1.24629	NA	1.14656	NA
Kupffer-specific sex-dependent	ENSMUSG00000102918.1	Pcdhgc3	chr18	37806364	37841873	HAVANA	+	protein_coding	NA	NA	NA	NA	NA	NA	NA	NA	NA	NA	NA	NA	NA	NA	NA	NA	NA	NA	-1.09184	NA	-1.4791	NA
Kupffer-specific sex-dependent	ENSMUSG00000046727.12	Cystm1	chr18	36345619	36402980	HAVANA	+	protein_coding	NA	NA	NA	NA	NA	NA	NA	NA	NA	NA	NA	NA	NA	NA	1.14263	NA	1.08013	1.10658	-0.88337	NA	NA	NA
Kupffer-specific sex-dependent	ENSMUSG00000091028.1	Gm10722	chr9	3000922	3002330	ENSEMBL	+	protein_coding	NA	NA	NA	NA	NA	NA	NA	NA	NA	NA	NA	NA	NA	NA	NA	NA	NA	NA	2.52689	NA	NA	NA
Kupffer-specific sex-dependent	ENSMUSG00000110344.1	Gm45716	chr11	90187683	90251255	HAVANA	+	protein_coding	NA	NA	NA	NA	NA	NA	NA	NA	NA	NA	NA	NA	NA	NA	NA	NA	NA	NA	-0.866863	NA	NA	NA
Kupffer-specific sex-dependent	ENSMUSG00000039943.16	Plcb4	chr2	135659011	136014593	HAVANA	+	protein_coding	NA	NA	NA	NA	NA	NA	NA	NA	NA	NA	NA	NA	NA	NA	NA	NA	NA	NA	-0.914049	NA	-1.34302	NA
Kupffer-specific sex-dependent	ENSMUSG00000026883.17	Dab2ip	chr2	35558266	35730994	HAVANA	+	protein_coding	NA	NA	NA	NA	NA	NA	NA	NA	NA	NA	NA	NA	NA	NA	NA	NA	NA	NA	-0.858568	NA	-1.04623	NA
Kupffer-specific sex-dependent	ENSMUSG00000033960.5	9430020K01Rik	chr18	4634929	4682868	ENSEMBL	+	protein_coding	NA	NA	NA	NA	NA	NA	NA	NA	NA	NA	NA	NA	NA	NA	NA	NA	NA	NA	-0.817674	NA	-0.899168	NA
Kupffer-specific sex-dependent	ENSMUSG00000028541.14	B4galt2	chr4	117869260	117883487	HAVANA	-	protein_coding	NA	NA	NA	NA	NA	NA	NA	NA	NA	NA	NA	NA	NA	NA	NA	NA	NA	NA	-0.904464	NA	NA	-1.34919
Kupffer-specific sex-dependent	ENSMUSG00000037606.18	Osbpl5	chr7	143688762	143756985	HAVANA	-	protein_coding	NA	NA	NA	NA	NA	NA	NA	NA	NA	NA	NA	NA	NA	NA	NA	NA	NA	NA	-0.936925	NA	-0.947344	-1.137
Kupffer-specific sex-dependent	ENSMUSG00000048218.5	Amigo2	chr15	97244074	97247287	ENSEMBL	-	protein_coding	NA	NA	NA	NA	NA	NA	NA	NA	NA	NA	NA	NA	NA	NA	NA	NA	NA	NA	-1.18228	NA	NA	NA
Kupffer-specific sex-dependent	ENSMUSG00000024395.7	Lims2	chr18	31931507	31958619	ENSEMBL	+	protein_coding	NA	NA	NA	NA	NA	NA	NA	NA	NA	NA	NA	NA	NA	NA	NA	NA	NA	NA	-0.935317	NA	NA	NA
Kupffer-specific sex-dependent	ENSMUSG00000049804.9	Armcx4	chrX	134686519	134696757	HAVANA	+	protein_coding	NA	NA	NA	NA	NA	NA	NA	NA	NA	NA	NA	NA	NA	NA	NA	NA	NA	NA	-1.18044	NA	NA	NA
Kupffer-specific sex-dependent	ENSMUSG00000097039.8	Pvt1	chr15	62037986	62378096	HAVANA	+	lincRNA	NA	NA	NA	NA	NA	NA	NA	NA	NA	NA	NA	NA	NA	NA	NA	NA	NA	NA	0.814261	NA	NA	NA
Kupffer-specific sex-dependent	ENSMUSG00000035202.8	Lars2	chr9	123366927	123462666	HAVANA	+	protein_coding	NA	NA	NA	NA	NA	NA	NA	NA	NA	NA	NA	NA	NA	NA	NA	NA	NA	NA	1.28345	NA	NA	NA
Kupffer-specific sex-dependent	ENSMUSG00000041842.15	Fhdc1	chr3	84442198	84480429	HAVANA	-	protein_coding	NA	NA	NA	NA	NA	NA	NA	NA	NA	NA	NA	NA	NA	NA	NA	NA	NA	NA	-1.21235	NA	NA	NA
Kupffer-specific sex-dependent	ENSMUSG00000070287.3	Slc35g2	chr9	100552188	100571090	HAVANA	-	protein_coding	NA	NA	NA	NA	NA	NA	NA	NA	NA	NA	NA	NA	NA	NA	NA	NA	NA	NA	-1.03504	NA	NA	NA
Kupffer-specific sex-dependent	ENSMUSG00000048186.14	Bend7	chr2	4717831	4802142	HAVANA	+	protein_coding	NA	NA	NA	NA	NA	NA	NA	NA	NA	NA	NA	NA	NA	NA	NA	NA	NA	NA	-1.34736	NA	NA	NA
Kupffer-specific sex-dependent	ENSMUSG00000029231.15	Pdgfra	chr5	75152292	75198215	HAVANA	+	protein_coding	NA	NA	NA	NA	NA	NA	NA	NA	NA	NA	NA	NA	NA	NA	NA	NA	NA	NA	-1.36922	NA	-2.09352	NA
Kupffer-specific sex-dependent	ENSMUSG00000045103.17	Dmd	chrX	82948870	85206141	HAVANA	+	protein_coding	NA	NA	NA	NA	NA	NA	NA	NA	NA	NA	NA	NA	NA	NA	NA	NA	NA	NA	-0.916327	NA	-1.29156	NA
Kupffer-specific sex-dependent	ENSMUSG00000032366.15	Tpm1	chr9	67022590	67049406	HAVANA	-	protein_coding	NA	NA	NA	NA	NA	NA	NA	NA	NA	NA	NA	NA	NA	NA	NA	NA	NA	NA	NA	-0.83566	NA	NA
Kupffer-specific sex-dependent	ENSMUSG00000054690.17	Emcn	chr3	137341067	137432185	HAVANA	+	protein_coding	NA	NA	NA	NA	NA	NA	NA	NA	NA	NA	NA	NA	NA	NA	NA	NA	NA	NA	NA	1.55878	NA	1.82559
Kupffer-specific sex-dependent	ENSMUSG00000065947.3	mt-Nd4l	chrM	9877	10173	ENSEMBL	+	protein_coding	NA	NA	NA	NA	NA	NA	NA	NA	NA	NA	NA	NA	NA	NA	NA	NA	NA	NA	NA	-9.36856	NA	NA
Kupffer-specific sex-dependent	ENSMUSG00000001946.14	Esam	chr9	37528078	37538319	HAVANA	+	protein_coding	NA	NA	NA	NA	NA	NA	NA	NA	NA	NA	NA	NA	NA	NA	NA	NA	NA	NA	NA	1.32374	NA	NA
Kupffer-specific sex-dependent	ENSMUSG00000029648.13	Flt1	chr5	147561604	147726011	HAVANA	-	protein_coding	NA	NA	NA	NA	NA	NA	NA	NA	NA	NA	NA	NA	NA	NA	NA	NA	NA	NA	NA	1.38688	NA	1.61568
Kupffer-specific sex-dependent	ENSMUSG00000033191.14	Tie1	chr4	118471191	118490061	HAVANA	-	protein_coding	NA	NA	NA	NA	NA	NA	NA	NA	NA	NA	NA	NA	NA	NA	NA	NA	NA	NA	NA	2.12565	NA	1.61382
Kupffer-specific sex-dependent	ENSMUSG00000051065.8	Mb21d2	chr16	28826176	28929698	ENSEMBL	-	protein_coding	NA	NA	NA	NA	NA	NA	NA	NA	NA	NA	NA	NA	NA	NA	NA	NA	NA	NA	NA	0.855223	NA	NA
Kupffer-specific sex-dependent	ENSMUSG00000044562.12	Rasip1	chr7	45627488	45639093	HAVANA	+	protein_coding	NA	NA	NA	NA	NA	NA	NA	NA	NA	NA	NA	NA	NA	NA	NA	NA	NA	NA	NA	1.58522	NA	1.512
Kupffer-specific sex-dependent	ENSMUSG00000044258.9	Ctla2a	chr13	60934155	60936625	ENSEMBL	-	protein_coding	NA	NA	NA	NA	NA	NA	NA	NA	NA	NA	NA	NA	NA	NA	NA	NA	NA	NA	NA	1.18764	NA	1.13786
Kupffer-specific sex-dependent	ENSMUSG00000006386.15	Tek	chr4	94739289	94874976	HAVANA	+	protein_coding	NA	NA	NA	NA	NA	NA	NA	NA	NA	NA	NA	NA	NA	NA	NA	NA	NA	NA	NA	1.44462	NA	1.45686
Kupffer-specific sex-dependent	ENSMUSG00000039167.11	Adgrl4	chr3	151437887	151545086	HAVANA	+	protein_coding	NA	NA	NA	NA	NA	NA	NA	NA	NA	NA	NA	NA	NA	NA	NA	NA	NA	NA	NA	1.42675	NA	1.31884
Kupffer-specific sex-dependent	ENSMUSG00000056492.5	Adgrf5	chr17	43389466	43459557	ENSEMBL	+	protein_coding	NA	NA	NA	NA	NA	NA	NA	NA	NA	NA	NA	NA	NA	NA	NA	NA	NA	NA	NA	1.2338	NA	1.29907
Kupffer-specific sex-dependent	ENSMUSG00000025608.9	Podxl	chr6	31519488	31563981	HAVANA	-	protein_coding	NA	NA	NA	NA	NA	NA	NA	NA	NA	NA	NA	NA	NA	NA	NA	NA	NA	NA	NA	1.43764	NA	NA
Kupffer-specific sex-dependent	ENSMUSG00000031871.9	Cdh5	chr8	104101625	104144511	HAVANA	+	protein_coding	NA	NA	NA	NA	NA	NA	NA	NA	NA	NA	NA	NA	NA	NA	NA	NA	NA	NA	NA	1.207	NA	1.28212
Kupffer-specific sex-dependent	ENSMUSG00000002732.14	Fkbp7	chr2	76663044	76673116	HAVANA	-	protein_coding	NA	NA	NA	NA	NA	NA	NA	NA	NA	NA	NA	NA	NA	NA	NA	NA	NA	NA	NA	-1.02832	NA	NA
