# Supplementary material for: Hedgehog dysregulation contributes to tissue-specific inflammaging of resident macrophages
Source: Aging (Albany NY). 2021 Aug 14;13(15):19207–29. doi: 10.18632/aging.203422 (PMC8386529; doi:10.18632/aging.203422)
Supplement: Supplementary Table 3 [file aging-13-203422-s004.xlsx]

## Sheet: Sheet1
Supplementary Table 3. GO enrichment analysis.
Cluster	ID	Description	Proportion of genes	Background proportion	p value	p.adjust	q value	Number of genes	Genes
BMDM specific, LPS induced	GO:0001819	positive regulation of cytokine production	'11/74	391/20565	1.45795e-07	0.000215846	0.000166162	11	Ly9/Prg2/Ccl5/Rasgrp1/Icosl/Il15/Il12b/Clec5a/Tnf/Ticam1/Mcoln2
BMDM specific, LPS induced	GO:0032814	regulation of natural killer cell activation	'5/74	38/20565	2.40631e-07	0.000215846	0.000166162	5	Slamf7/Rasgrp1/Il15/Il12b/Ticam1
BMDM specific, LPS induced	GO:0071222	cellular response to lipopolysaccharide	'7/74	143/20565	8.27307e-07	0.000494729	0.000380851	7	Plscr1/Ccl5/Sash1/Gfi1/Il12b/Tnf/Ticam1
BMDM specific, LPS induced	GO:0071219	cellular response to molecule of bacterial origin	'7/74	152/20565	1.24725e-06	0.000559394	0.000430631	7	Plscr1/Ccl5/Sash1/Gfi1/Il12b/Tnf/Ticam1
BMDM specific, LPS induced	GO:0032816	positive regulation of natural killer cell activation	'4/74	25/20565	1.84498e-06	0.000619826	0.000477153	4	Rasgrp1/Il15/Il12b/Ticam1
BMDM specific, LPS induced	GO:0043901	negative regulation of multi-organism process	'7/74	164/20565	2.073e-06	0.000619826	0.000477153	7	Plscr1/Ccl5/Ifitm2/Timp1/Camp/Il12b/Tnf
BMDM specific, LPS induced	GO:0032496	response to lipopolysaccharide	'8/74	243/20565	2.60681e-06	0.000638064	0.000491193	8	Plscr1/Wfdc21/Ccl5/Sash1/Gfi1/Il12b/Tnf/Ticam1
BMDM specific, LPS induced	GO:0071216	cellular response to biotic stimulus	'7/74	172/20565	2.84532e-06	0.000638064	0.000491193	7	Plscr1/Ccl5/Sash1/Gfi1/Il12b/Tnf/Ticam1
BMDM specific, LPS induced	GO:0002237	response to molecule of bacterial origin	'8/74	262/20565	4.54736e-06	0.00090644	0.000697794	8	Plscr1/Wfdc21/Ccl5/Sash1/Gfi1/Il12b/Tnf/Ticam1
BMDM specific, LPS induced	GO:0002694	regulation of leukocyte activation	'10/74	467/20565	6.48689e-06	0.00116375	0.000895874	10	Plscr1/Ccl5/Slamf7/Rasgrp1/Icosl/Il15/Il12b/Sdc4/Adora2a/Ticam1
BMDM specific, LPS induced	GO:0043900	regulation of multi-organism process	'9/74	373/20565	7.54355e-06	0.00123028	0.000947094	9	Plscr1/Ccl5/Ifitm2/Sash1/Timp1/Camp/Il15/Il12b/Tnf
BMDM specific, LPS induced	GO:0009617	response to bacterium	'10/74	484/20565	8.86561e-06	0.0012423	0.000956342	10	Plscr1/Wfdc21/Prg2/Ccl5/Sash1/Camp/Gfi1/Il12b/Tnf/Ticam1
BMDM specific, LPS induced	GO:2000341	regulation of chemokine (C-X-C motif) ligand 2 production	'3/74	12/20565	9.61296e-06	0.0012423	0.000956342	3	Ccl5/Tnf/Mcoln2
BMDM specific, LPS induced	GO:0051249	regulation of lymphocyte activation	'9/74	391/20565	1.09993e-05	0.0012423	0.000956342	9	Ccl5/Slamf7/Rasgrp1/Icosl/Il15/Il12b/Sdc4/Adora2a/Ticam1
BMDM specific, LPS induced	GO:0045071	negative regulation of viral genome replication	'4/74	39/20565	1.15477e-05	0.0012423	0.000956342	4	Plscr1/Ccl5/Ifitm2/Tnf
BMDM specific, LPS induced	GO:1903037	regulation of leukocyte cell-cell adhesion	'8/74	298/20565	1.16425e-05	0.0012423	0.000956342	8	Ccl5/Rasgrp1/Icosl/Il15/Il12b/Tnf/Sdc4/Adora2a
BMDM specific, LPS induced	GO:0032740	positive regulation of interleukin-17 production	'3/74	13/20565	1.24645e-05	0.0012423	0.000956342	3	Ly9/Il15/Il12b
BMDM specific, LPS induced	GO:0072567	chemokine (C-X-C motif) ligand 2 production	'3/74	13/20565	1.24645e-05	0.0012423	0.000956342	3	Ccl5/Tnf/Mcoln2
BMDM specific, LPS induced	GO:0031663	lipopolysaccharide-mediated signaling pathway	'4/74	46/20565	2.24784e-05	0.00202361	0.00155781	4	Ccl5/Sash1/Tnf/Ticam1
BMDM specific, LPS induced	GO:0007159	leukocyte cell-cell adhesion	'8/74	328/20565	2.32174e-05	0.00202361	0.00155781	8	Ccl5/Rasgrp1/Icosl/Il15/Il12b/Tnf/Sdc4/Adora2a
BMDM specific, LPS induced	GO:0030101	natural killer cell activation	'5/74	95/20565	2.36877e-05	0.00202361	0.00155781	5	Slamf7/Rasgrp1/Il15/Il12b/Ticam1
BMDM specific, LPS induced	GO:0009615	response to virus	'7/74	245/20565	2.85299e-05	0.00232648	0.00179097	7	Plscr1/Ccl5/Ifitm2/Il15/Il12b/Tnf/Ticam1
BMDM specific, LPS induced	GO:0098542	defense response to other organism	'9/74	469/20565	4.59251e-05	0.00339736	0.00261534	9	Plscr1/Prg2/Ccl5/Ifitm2/Camp/Il15/Il12b/Tnf/Ticam1
BMDM specific, LPS induced	GO:0042110	T cell activation	'9/74	472/20565	4.82452e-05	0.00339736	0.00261534	9	Ly9/Ccl5/Rasgrp1/Ebi3/Icosl/Il15/Il12b/Sdc4/Adora2a
BMDM specific, LPS induced	GO:0044130	negative regulation of growth of symbiont in host	'3/74	20/20565	4.87916e-05	0.00339736	0.00261534	3	Camp/Il12b/Tnf
BMDM specific, LPS induced	GO:0032722	positive regulation of chemokine production	'4/74	56/20565	4.92371e-05	0.00339736	0.00261534	4	Ccl5/Tnf/Ticam1/Mcoln2
BMDM specific, LPS induced	GO:1903039	positive regulation of leukocyte cell-cell adhesion	'6/74	183/20565	5.13074e-05	0.00340909	0.00262438	6	Ccl5/Rasgrp1/Icosl/Il15/Il12b/Tnf
BMDM specific, LPS induced	GO:0044126	regulation of growth of symbiont in host	'3/74	21/20565	5.67765e-05	0.00350094	0.00269509	3	Camp/Il12b/Tnf
BMDM specific, LPS induced	GO:0044146	negative regulation of growth of symbiont involved in interaction with host	'3/74	21/20565	5.67765e-05	0.00350094	0.00269509	3	Camp/Il12b/Tnf
BMDM specific, LPS induced	GO:0050778	positive regulation of immune response	'9/74	484/20565	5.85442e-05	0.00350094	0.00269509	9	Plscr1/Rasgrp1/Themis2/Gfi1/Cd247/Il15/Il12b/Tnf/Ticam1
BMDM specific, LPS induced	GO:0044144	modulation of growth of symbiont involved in interaction with host	'3/74	22/20565	6.55713e-05	0.00374985	0.0028867	3	Camp/Il12b/Tnf
BMDM specific, LPS induced	GO:0043903	regulation of symbiosis, encompassing mutualism through parasitism	'6/74	193/20565	6.8931e-05	0.00374985	0.0028867	6	Plscr1/Ccl5/Ifitm2/Camp/Il12b/Tnf
BMDM specific, LPS induced	GO:0045089	positive regulation of innate immune response	'6/74	194/20565	7.093e-05	0.00374985	0.0028867	6	Plscr1/Rasgrp1/Gfi1/Il12b/Tnf/Ticam1
BMDM specific, LPS induced	GO:0050863	regulation of T cell activation	'7/74	283/20565	7.10673e-05	0.00374985	0.0028867	7	Ccl5/Rasgrp1/Icosl/Il15/Il12b/Sdc4/Adora2a
BMDM specific, LPS induced	GO:0042098	T cell proliferation	'6/74	197/20565	7.72065e-05	0.00385494	0.0029676	6	Ccl5/Ebi3/Icosl/Il15/Il12b/Sdc4
BMDM specific, LPS induced	GO:0022407	regulation of cell-cell adhesion	'8/74	389/20565	7.73567e-05	0.00385494	0.0029676	8	Ccl5/Rasgrp1/Icosl/Il15/Il12b/Tnf/Sdc4/Adora2a
BMDM specific, LPS induced	GO:1903901	negative regulation of viral life cycle	'4/74	65/20565	8.85691e-05	0.00418502	0.0032217	4	Plscr1/Ccl5/Ifitm2/Tnf
BMDM specific, LPS induced	GO:0051607	defense response to virus	'6/74	202/20565	8.86458e-05	0.00418502	0.0032217	6	Plscr1/Ccl5/Ifitm2/Il15/Il12b/Ticam1
BMDM specific, LPS induced	GO:0031349	positive regulation of defense response	'7/74	296/20565	9.40915e-05	0.00432821	0.00333193	7	Plscr1/Ccl5/Rasgrp1/Gfi1/Il12b/Tnf/Ticam1
BMDM specific, LPS induced	GO:0044117	growth of symbiont in host	'3/74	25/20565	9.71744e-05	0.00435827	0.00335507	3	Camp/Il12b/Tnf
BMDM specific, LPS induced	GO:0046651	lymphocyte proliferation	'7/74	301/20565	0.000104425	0.00446729	0.003439	7	Ccl5/Ebi3/Icosl/Il15/Il12b/Sdc4/Ticam1
BMDM specific, LPS induced	GO:0032943	mononuclear cell proliferation	'7/74	303/20565	0.000108809	0.00446729	0.003439	7	Ccl5/Ebi3/Icosl/Il15/Il12b/Sdc4/Ticam1
BMDM specific, LPS induced	GO:0044110	growth involved in symbiotic interaction	'3/74	26/20565	0.000109566	0.00446729	0.003439	3	Camp/Il12b/Tnf
BMDM specific, LPS induced	GO:0044116	growth of symbiont involved in interaction with host	'3/74	26/20565	0.000109566	0.00446729	0.003439	3	Camp/Il12b/Tnf
BMDM specific, LPS induced	GO:0050671	positive regulation of lymphocyte proliferation	'5/74	132/20565	0.000114064	0.00454735	0.00350063	5	Ccl5/Icosl/Il15/Il12b/Ticam1
BMDM specific, LPS induced	GO:0045069	regulation of viral genome replication	'4/74	70/20565	0.00011833	0.00456911	0.00351738	4	Plscr1/Ccl5/Ifitm2/Tnf
BMDM specific, LPS induced	GO:0032946	positive regulation of mononuclear cell proliferation	'5/74	134/20565	0.000122429	0.00456911	0.00351738	5	Ccl5/Icosl/Il15/Il12b/Ticam1
BMDM specific, LPS induced	GO:0032660	regulation of interleukin-17 production	'3/74	27/20565	0.000122943	0.00456911	0.00351738	3	Ly9/Il15/Il12b
BMDM specific, LPS induced	GO:0050670	regulation of lymphocyte proliferation	'6/74	215/20565	0.000124797	0.00456911	0.00351738	6	Ccl5/Icosl/Il15/Il12b/Sdc4/Ticam1
BMDM specific, LPS induced	GO:0032944	regulation of mononuclear cell proliferation	'6/74	217/20565	0.000131269	0.00470993	0.00362579	6	Ccl5/Icosl/Il15/Il12b/Sdc4/Ticam1
BMDM specific, LPS induced	GO:0022409	positive regulation of cell-cell adhesion	'6/74	218/20565	0.000134603	0.00473486	0.00364498	6	Ccl5/Rasgrp1/Icosl/Il15/Il12b/Tnf
BMDM specific, LPS induced	GO:0070661	leukocyte proliferation	'7/74	316/20565	0.000141105	0.00486812	0.00374757	7	Ccl5/Ebi3/Icosl/Il15/Il12b/Sdc4/Ticam1
BMDM specific, LPS induced	GO:0070665	positive regulation of leukocyte proliferation	'5/74	140/20565	0.000150371	0.00507611	0.00390768	5	Ccl5/Icosl/Il15/Il12b/Ticam1
BMDM specific, LPS induced	GO:0045672	positive regulation of osteoclast differentiation	'3/74	29/20565	0.000152793	0.00507611	0.00390768	3	Ccl5/Il12b/Tnf
BMDM specific, LPS induced	GO:0070663	regulation of leukocyte proliferation	'6/74	225/20565	0.000159869	0.00521465	0.00401433	6	Ccl5/Icosl/Il15/Il12b/Sdc4/Ticam1
BMDM specific, LPS induced	GO:0032642	regulation of chemokine production	'4/74	78/20565	0.000180135	0.00577075	0.00444242	4	Ccl5/Tnf/Ticam1/Mcoln2
BMDM specific, LPS induced	GO:0032620	interleukin-17 production	'3/74	32/20565	0.000205802	0.00644015	0.00495774	3	Ly9/Il15/Il12b
BMDM specific, LPS induced	GO:0048525	negative regulation of viral process	'4/74	81/20565	0.000208402	0.00644015	0.00495774	4	Plscr1/Ccl5/Ifitm2/Tnf
BMDM specific, LPS induced	GO:0045088	regulation of innate immune response	'6/74	237/20565	0.0002118	0.00644015	0.00495774	6	Plscr1/Rasgrp1/Gfi1/Il12b/Tnf/Ticam1
BMDM specific, LPS induced	GO:0032602	chemokine production	'4/74	82/20565	0.000218496	0.00653302	0.00502924	4	Ccl5/Tnf/Ticam1/Mcoln2
BMDM specific, LPS induced	GO:1902107	positive regulation of leukocyte differentiation	'5/74	153/20565	0.000227487	0.00669036	0.00515036	5	Ccl5/Rasgrp1/Il15/Il12b/Tnf
BMDM specific, LPS induced	GO:0051251	positive regulation of lymphocyte activation	'6/74	244/20565	0.000247736	0.00716835	0.00551832	6	Ccl5/Rasgrp1/Icosl/Il15/Il12b/Ticam1
BMDM specific, LPS induced	GO:0019079	viral genome replication	'4/74	87/20565	0.00027432	0.00781158	0.00601349	4	Plscr1/Ccl5/Ifitm2/Tnf
BMDM specific, LPS induced	GO:0042129	regulation of T cell proliferation	'5/74	163/20565	0.000304881	0.00854619	0.00657901	5	Ccl5/Icosl/Il15/Il12b/Sdc4
BMDM specific, LPS induced	GO:0002757	immune response-activating signal transduction	'6/74	256/20565	0.000320363	0.00884202	0.00680675	6	Plscr1/Themis2/Gfi1/Cd247/Tnf/Ticam1
BMDM specific, LPS induced	GO:0042102	positive regulation of T cell proliferation	'4/74	95/20565	0.000383929	0.0104205	0.00802186	4	Ccl5/Icosl/Il15/Il12b
BMDM specific, LPS induced	GO:0045785	positive regulation of cell adhesion	'7/74	374/20565	0.000393203	0.0104205	0.00802186	7	Ccl5/Rasgrp1/Icosl/Il15/Il12b/Tnf/Sdc4
BMDM specific, LPS induced	GO:0034341	response to interferon-gamma	'4/74	96/20565	0.000399538	0.0104205	0.00802186	4	Ccl9/Ccl5/Ifitm2/Il12b
BMDM specific, LPS induced	GO:0050870	positive regulation of T cell activation	'5/74	173/20565	0.000400787	0.0104205	0.00802186	5	Ccl5/Rasgrp1/Icosl/Il15/Il12b
BMDM specific, LPS induced	GO:0002764	immune response-regulating signaling pathway	'6/74	269/20565	0.000416895	0.0106202	0.00817565	6	Plscr1/Themis2/Gfi1/Cd247/Tnf/Ticam1
BMDM specific, LPS induced	GO:1902105	regulation of leukocyte differentiation	'6/74	270/20565	0.000425168	0.0106202	0.00817565	6	Ccl5/Tmem176a/Rasgrp1/Il15/Il12b/Tnf
BMDM specific, LPS induced	GO:0042035	regulation of cytokine biosynthetic process	'4/74	98/20565	0.000432109	0.0106202	0.00817565	4	Prg2/Icosl/Tnf/Ticam1
BMDM specific, LPS induced	GO:0050691	regulation of defense response to virus by host	'3/74	41/20565	0.00043215	0.0106202	0.00817565	3	Ccl5/Il15/Il12b
BMDM specific, LPS induced	GO:0006953	acute-phase response	'3/74	42/20565	0.000464194	0.0112536	0.00866319	3	Plscr1/Ccl5/Tnf
BMDM specific, LPS induced	GO:0002696	positive regulation of leukocyte activation	'6/74	284/20565	0.000555056	0.0132769	0.0102208	6	Ccl5/Rasgrp1/Icosl/Il15/Il12b/Ticam1
BMDM specific, LPS induced	GO:0031620	regulation of fever generation	'2/74	10/20565	0.000564181	0.0133176	0.0102522	2	Ccl5/Tnf
BMDM specific, LPS induced	GO:1903708	positive regulation of hemopoiesis	'5/74	193/20565	0.000659142	0.015051	0.0115865	5	Ccl5/Rasgrp1/Il15/Il12b/Tnf
BMDM specific, LPS induced	GO:0042089	cytokine biosynthetic process	'4/74	110/20565	0.000668535	0.015051	0.0115865	4	Prg2/Icosl/Tnf/Ticam1
BMDM specific, LPS induced	GO:0001787	natural killer cell proliferation	'2/74	11/20565	0.000687948	0.015051	0.0115865	2	Il15/Il12b
BMDM specific, LPS induced	GO:0032725	positive regulation of granulocyte macrophage colony-stimulating factor production	'2/74	11/20565	0.000687948	0.015051	0.0115865	2	Rasgrp1/Il12b
BMDM specific, LPS induced	GO:0032825	positive regulation of natural killer cell differentiation	'2/74	11/20565	0.000687948	0.015051	0.0115865	2	Rasgrp1/Il15
BMDM specific, LPS induced	GO:0051132	NK T cell activation	'2/74	11/20565	0.000687948	0.015051	0.0115865	2	Il15/Il12b
BMDM specific, LPS induced	GO:0050867	positive regulation of cell activation	'6/74	298/20565	0.000713948	0.0154316	0.0118795	6	Ccl5/Rasgrp1/Icosl/Il15/Il12b/Ticam1
BMDM specific, LPS induced	GO:0042107	cytokine metabolic process	'4/74	114/20565	0.000764405	0.0163255	0.0125677	4	Prg2/Icosl/Tnf/Ticam1
BMDM specific, LPS induced	GO:0002437	inflammatory response to antigenic stimulus	'3/74	50/20565	0.000776348	0.0163855	0.0126139	3	Rasgrp1/Il12b/Tnf
BMDM specific, LPS induced	GO:0042531	positive regulation of tyrosine phosphorylation of STAT protein	'3/74	51/20565	0.000822748	0.0164174	0.0126384	3	Ccl5/Il15/Il12b
BMDM specific, LPS induced	GO:0031652	positive regulation of heat generation	'2/74	12/20565	0.000823615	0.0164174	0.0126384	2	Ccl5/Tnf
BMDM specific, LPS induced	GO:0042033	chemokine biosynthetic process	'2/74	12/20565	0.000823615	0.0164174	0.0126384	2	Tnf/Ticam1
BMDM specific, LPS induced	GO:0042362	fat-soluble vitamin biosynthetic process	'2/74	12/20565	0.000823615	0.0164174	0.0126384	2	Gfi1/Tnf
BMDM specific, LPS induced	GO:0045073	regulation of chemokine biosynthetic process	'2/74	12/20565	0.000823615	0.0164174	0.0126384	2	Tnf/Ticam1
BMDM specific, LPS induced	GO:0033002	muscle cell proliferation	'5/74	205/20565	0.000864628	0.0170455	0.0131219	5	Ccl5/Jarid2/Il15/Il12b/Tnf
BMDM specific, LPS induced	GO:1903900	regulation of viral life cycle	'4/74	120/20565	0.000925872	0.0179603	0.0138261	4	Plscr1/Ccl5/Ifitm2/Tnf
BMDM specific, LPS induced	GO:0002253	activation of immune response	'6/74	315/20565	0.000951946	0.0179603	0.0138261	6	Plscr1/Themis2/Gfi1/Cd247/Tnf/Ticam1
BMDM specific, LPS induced	GO:0030656	regulation of vitamin metabolic process	'2/74	13/20565	0.000971097	0.0179603	0.0138261	2	Gfi1/Tnf
BMDM specific, LPS induced	GO:0032604	granulocyte macrophage colony-stimulating factor production	'2/74	13/20565	0.000971097	0.0179603	0.0138261	2	Rasgrp1/Il12b
BMDM specific, LPS induced	GO:0032645	regulation of granulocyte macrophage colony-stimulating factor production	'2/74	13/20565	0.000971097	0.0179603	0.0138261	2	Rasgrp1/Il12b
BMDM specific, LPS induced	GO:1905048	regulation of metallopeptidase activity	'2/74	13/20565	0.000971097	0.0179603	0.0138261	2	Antxr1/Timp1
BMDM specific, LPS induced	GO:0044403	symbiosis, encompassing mutualism through parasitism	'6/74	324/20565	0.00110049	0.0198181	0.0152563	6	Plscr1/Ccl5/Ifitm2/Camp/Il12b/Tnf
BMDM specific, LPS induced	GO:0001660	fever generation	'2/74	14/20565	0.00113031	0.0198181	0.0152563	2	Ccl5/Tnf
BMDM specific, LPS induced	GO:0016322	neuron remodeling	'2/74	14/20565	0.00113031	0.0198181	0.0152563	2	Scarf1/Rnd1
BMDM specific, LPS induced	GO:0031650	regulation of heat generation	'2/74	14/20565	0.00113031	0.0198181	0.0152563	2	Ccl5/Tnf
BMDM specific, LPS induced	GO:0050755	chemokine metabolic process	'2/74	14/20565	0.00113031	0.0198181	0.0152563	2	Tnf/Ticam1
BMDM specific, LPS induced	GO:0071396	cellular response to lipid	'7/74	448/20565	0.00113783	0.0198181	0.0152563	7	Plscr1/Ccl5/Sash1/Gfi1/Il12b/Tnf/Ticam1
BMDM specific, LPS induced	GO:0002763	positive regulation of myeloid leukocyte differentiation	'3/74	58/20565	0.00119727	0.020653	0.015899	3	Ccl5/Il12b/Tnf
BMDM specific, LPS induced	GO:0033674	positive regulation of kinase activity	'7/74	454/20565	0.00122852	0.0209902	0.0161586	7	Sash1/Rasgrp1/Rapgef2/Il12b/Lmo4/Tnf/Sdc4
BMDM specific, LPS induced	GO:0042359	vitamin D metabolic process	'2/74	15/20565	0.00130117	0.0220217	0.0169527	2	Gfi1/Tnf
BMDM specific, LPS induced	GO:0019221	cytokine-mediated signaling pathway	'6/74	336/20565	0.00132555	0.0222246	0.0171089	6	Ccl9/Ccl5/Gfi1/Il15/Tnf/Lrrc4
BMDM specific, LPS induced	GO:0001885	endothelial cell development	'3/74	61/20565	0.00138575	0.0230188	0.0177203	3	Col18a1/Rapgef2/Tnf
BMDM specific, LPS induced	GO:0042108	positive regulation of cytokine biosynthetic process	'3/74	62/20565	0.00145247	0.0239057	0.018403	3	Icosl/Tnf/Ticam1
BMDM specific, LPS induced	GO:0046631	alpha-beta T cell activation	'4/74	136/20565	0.00147169	0.024002	0.0184771	4	Ly9/Il15/Il12b/Adora2a
BMDM specific, LPS induced	GO:0044419	interspecies interaction between organisms	'6/74	344/20565	0.00149411	0.024148	0.0185896	6	Plscr1/Ccl5/Ifitm2/Camp/Il12b/Tnf
BMDM specific, LPS induced	GO:0002831	regulation of response to biotic stimulus	'4/74	137/20565	0.00151187	0.0242169	0.0186426	4	Ccl5/Sash1/Il15/Il12b
BMDM specific, LPS induced	GO:0043410	positive regulation of MAPK cascade	'7/74	473/20565	0.00155373	0.0246671	0.0189892	7	Ccl9/Mid1/Ccl5/Sash1/Rasgrp1/Rapgef2/Tnf
BMDM specific, LPS induced	GO:0048660	regulation of smooth muscle cell proliferation	'4/74	140/20565	0.00163698	0.0257215	0.0198009	4	Ccl5/Il15/Il12b/Tnf
BMDM specific, LPS induced	GO:0032693	negative regulation of interleukin-10 production	'2/74	17/20565	0.00167749	0.0257215	0.0198009	2	Prg2/Il12b
BMDM specific, LPS induced	GO:0032823	regulation of natural killer cell differentiation	'2/74	17/20565	0.00167749	0.0257215	0.0198009	2	Rasgrp1/Il15
BMDM specific, LPS induced	GO:0042659	regulation of cell fate specification	'2/74	17/20565	0.00167749	0.0257215	0.0198009	2	Gfi1/Lmo4
BMDM specific, LPS induced	GO:0042509	regulation of tyrosine phosphorylation of STAT protein	'3/74	66/20565	0.00173942	0.026445	0.0203578	3	Ccl5/Il15/Il12b
BMDM specific, LPS induced	GO:0051345	positive regulation of hydrolase activity	'7/74	484/20565	0.00177063	0.0266933	0.020549	7	Ccl9/Plscr1/Antxr1/Ccl5/Rasgrp1/Rapgef2/Tnf
BMDM specific, LPS induced	GO:0048659	smooth muscle cell proliferation	'4/74	145/20565	0.00186122	0.0278253	0.0214204	4	Ccl5/Il15/Il12b/Tnf
BMDM specific, LPS induced	GO:0045926	negative regulation of growth	'5/74	245/20565	0.00190208	0.0282011	0.0217097	5	Camp/Jarid2/Il12b/Tnf/Rrad
BMDM specific, LPS induced	GO:0002366	leukocyte activation involved in immune response	'5/74	246/20565	0.00193617	0.0284712	0.0219177	5	Ly9/Rasgrp1/Icosl/Il12b/Ticam1
BMDM specific, LPS induced	GO:0032874	positive regulation of stress-activated MAPK cascade	'4/74	147/20565	0.0019566	0.0285377	0.0219688	4	Mid1/Sash1/Rasgrp1/Tnf
BMDM specific, LPS induced	GO:0045670	regulation of osteoclast differentiation	'3/74	69/20565	0.00197629	0.0285924	0.022011	3	Ccl5/Il12b/Tnf
BMDM specific, LPS induced	GO:0070304	positive regulation of stress-activated protein kinase signaling cascade	'4/74	148/20565	0.00200553	0.0287834	0.022158	4	Mid1/Sash1/Rasgrp1/Tnf
BMDM specific, LPS induced	GO:0007260	tyrosine phosphorylation of STAT protein	'3/74	70/20565	0.00205948	0.0293231	0.0225734	3	Ccl5/Il15/Il12b
BMDM specific, LPS induced	GO:0002263	cell activation involved in immune response	'5/74	250/20565	0.00207703	0.0293401	0.0225866	5	Ly9/Rasgrp1/Icosl/Il12b/Ticam1
BMDM specific, LPS induced	GO:0002250	adaptive immune response	'6/74	368/20565	0.00209907	0.0293726	0.0226116	6	Ly9/Slamf7/Icosl/Il12b/Tnf/Mcoln2
BMDM specific, LPS induced	GO:0032729	positive regulation of interferon-gamma production	'3/74	71/20565	0.00214482	0.0293726	0.0226116	3	Rasgrp1/Il12b/Tnf
BMDM specific, LPS induced	GO:0046427	positive regulation of JAK-STAT cascade	'3/74	71/20565	0.00214482	0.0293726	0.0226116	3	Ccl5/Il15/Il12b
BMDM specific, LPS induced	GO:1904894	positive regulation of STAT cascade	'3/74	71/20565	0.00214482	0.0293726	0.0226116	3	Ccl5/Il15/Il12b
BMDM specific, LPS induced	GO:0050688	regulation of defense response to virus	'3/74	72/20565	0.00223234	0.0302897	0.0233176	3	Ccl5/Il15/Il12b
BMDM specific, LPS induced	GO:1903706	regulation of hemopoiesis	'6/74	373/20565	0.00224556	0.0302897	0.0233176	6	Ccl5/Tmem176a/Rasgrp1/Il15/Il12b/Tnf
BMDM specific, LPS induced	GO:0034612	response to tumor necrosis factor	'4/74	154/20565	0.00231707	0.0306991	0.0236327	4	Ccl9/Wfdc21/Ccl5/Tnf
BMDM specific, LPS induced	GO:0009110	vitamin biosynthetic process	'2/74	20/20565	0.00232725	0.0306991	0.0236327	2	Gfi1/Tnf
BMDM specific, LPS induced	GO:0033033	negative regulation of myeloid cell apoptotic process	'2/74	20/20565	0.00232725	0.0306991	0.0236327	2	Ccl5/Clec5a
BMDM specific, LPS induced	GO:1901888	regulation of cell junction assembly	'3/74	74/20565	0.00241394	0.0316103	0.0243342	3	Rapgef2/Tnf/Sdc4
BMDM specific, LPS induced	GO:0050792	regulation of viral process	'4/74	157/20565	0.00248469	0.0320686	0.024687	4	Plscr1/Ccl5/Ifitm2/Tnf
BMDM specific, LPS induced	GO:1904018	positive regulation of vasculature development	'4/74	157/20565	0.00248469	0.0320686	0.024687	4	Ccl5/Sash1/Camp/Rapgef2
BMDM specific, LPS induced	GO:0035455	response to interferon-alpha	'2/74	21/20565	0.00256624	0.0328846	0.0253151	2	Plscr1/Ifitm2
BMDM specific, LPS induced	GO:0071346	cellular response to interferon-gamma	'3/74	77/20565	0.00270309	0.0343925	0.026476	3	Ccl9/Ccl5/Il12b
BMDM specific, LPS induced	GO:0032760	positive regulation of tumor necrosis factor production	'3/74	78/20565	0.00280401	0.0348446	0.026824	3	Rasgrp1/Il12b/Ticam1
BMDM specific, LPS induced	GO:0031649	heat generation	'2/74	22/20565	0.00281631	0.0348446	0.026824	2	Ccl5/Tnf
BMDM specific, LPS induced	GO:0032753	positive regulation of interleukin-4 production	'2/74	22/20565	0.00281631	0.0348446	0.026824	2	Prg2/Icosl
BMDM specific, LPS induced	GO:0051043	regulation of membrane protein ectodomain proteolysis	'2/74	22/20565	0.00281631	0.0348446	0.026824	2	Timp1/Tnf
BMDM specific, LPS induced	GO:1903557	positive regulation of tumor necrosis factor superfamily cytokine production	'3/74	79/20565	0.00290723	0.035723	0.0275002	3	Rasgrp1/Il12b/Ticam1
BMDM specific, LPS induced	GO:0032103	positive regulation of response to external stimulus	'5/74	271/20565	0.00294247	0.0359102	0.0276443	5	Scarf1/Ccl5/Sash1/Tnf/Ticam1
BMDM specific, LPS induced	GO:0034329	cell junction assembly	'4/74	167/20565	0.00310352	0.037118	0.0285741	4	Rapgef2/Tnf/Sdc4/Micall2
BMDM specific, LPS induced	GO:0046425	regulation of JAK-STAT cascade	'4/74	167/20565	0.00310352	0.037118	0.0285741	4	Ccl5/Il15/Il12b/Lrrc4
BMDM specific, LPS induced	GO:1904892	regulation of STAT cascade	'4/74	167/20565	0.00310352	0.037118	0.0285741	4	Ccl5/Il15/Il12b/Lrrc4
BMDM specific, LPS induced	GO:0050727	regulation of inflammatory response	'5/74	279/20565	0.0033323	0.0395904	0.0304774	5	Ccl5/Il12b/Tnf/Adora2a/Ticam1
BMDM specific, LPS induced	GO:0019058	viral life cycle	'4/74	171/20565	0.00337806	0.03987	0.0306926	4	Plscr1/Ccl5/Ifitm2/Tnf
BMDM specific, LPS induced	GO:0042104	positive regulation of activated T cell proliferation	'2/74	25/20565	0.00363213	0.0425885	0.0327854	2	Icosl/Il12b
BMDM specific, LPS induced	GO:0002274	myeloid leukocyte activation	'4/74	176/20565	0.00374396	0.0436147	0.0335754	4	Plscr1/Ccl5/Rasgrp1/Ticam1
BMDM specific, LPS induced	GO:0045954	positive regulation of natural killer cell mediated cytotoxicity	'2/74	26/20565	0.00392568	0.0452679	0.034848	2	Rasgrp1/Il12b
BMDM specific, LPS induced	GO:0045860	positive regulation of protein kinase activity	'6/74	418/20565	0.00393634	0.0452679	0.034848	6	Sash1/Rasgrp1/Rapgef2/Il12b/Tnf/Sdc4
BMDM specific, LPS induced	GO:0007259	JAK-STAT cascade	'4/74	181/20565	0.00413591	0.0469609	0.0361513	4	Ccl5/Il15/Il12b/Lrrc4
BMDM specific, LPS induced	GO:0097696	STAT cascade	'4/74	181/20565	0.00413591	0.0469609	0.0361513	4	Ccl5/Il15/Il12b/Lrrc4
BMDM specific, LPS induced	GO:0002717	positive regulation of natural killer cell mediated immunity	'2/74	27/20565	0.0042299	0.0474277	0.0365107	2	Rasgrp1/Il12b
BMDM specific, LPS induced	GO:0032673	regulation of interleukin-4 production	'2/74	27/20565	0.0042299	0.0474277	0.0365107	2	Prg2/Icosl
BMDM specific, LPS induced	GO:0002224	toll-like receptor signaling pathway	'3/74	91/20565	0.00433092	0.0482588	0.0371505	3	Gfi1/Tnf/Ticam1
BMDM specific, LPS induced	GO:0050708	regulation of protein secretion	'6/74	428/20565	0.00441438	0.0488851	0.0376326	6	Ccl5/Hmgn3/Rasgrp1/Clec5a/Tnf/Adora2a
BMDM specific, LPS reduced	GO:1902850	microtubule cytoskeleton organization involved in mitosis	'8/116	116/20565	3.07388e-07	0.000346081	0.000290469	8	Eya1/Tpx2/Spry2/Birc5/Ccnb1/Racgap1/Cenpe/Spdl1
BMDM specific, LPS reduced	GO:0006323	DNA packaging	'9/116	165/20565	4.0522e-07	0.000346081	0.000290469	9	Hist1h4m/Hist1h3i/Top2a/Ccnb1/Hist1h3g/Hist1h1a/Hist1h3h/Ncaph/Hist1h1d
BMDM specific, LPS reduced	GO:0051988	regulation of attachment of spindle microtubules to kinetochore	'4/116	12/20565	4.59399e-07	0.000346081	0.000290469	4	Ccnb1/Racgap1/Cenpe/Ect2
BMDM specific, LPS reduced	GO:0140014	mitotic nuclear division	'10/116	238/20565	9.96085e-07	0.000562788	0.000472354	10	Tpx2/Cdkn1c/Birc5/Ccnb1/Racgap1/Igf1/Cenpe/Kif22/Ncaph/Spdl1
BMDM specific, LPS reduced	GO:0048145	regulation of fibroblast proliferation	'7/116	101/20565	1.68109e-06	0.000619468	0.000519926	7	Gas6/Ccnb1/Ccna2/Igf1/Pparg/E2f1/Cd300a
BMDM specific, LPS reduced	GO:0071103	DNA conformation change	'9/116	197/20565	1.78339e-06	0.000619468	0.000519926	9	Hist1h4m/Hist1h3i/Top2a/Ccnb1/Hist1h3g/Hist1h1a/Hist1h3h/Ncaph/Hist1h1d
BMDM specific, LPS reduced	GO:0048144	fibroblast proliferation	'7/116	103/20565	1.91871e-06	0.000619468	0.000519926	7	Gas6/Ccnb1/Ccna2/Igf1/Pparg/E2f1/Cd300a
BMDM specific, LPS reduced	GO:0051303	establishment of chromosome localization	'6/116	76/20565	4.48168e-06	0.00121493	0.0010197	6	Birc5/Ccnb1/Cenpf/Cenpe/Kif22/Spdl1
BMDM specific, LPS reduced	GO:0050000	chromosome localization	'6/116	77/20565	4.83821e-06	0.00121493	0.0010197	6	Birc5/Ccnb1/Cenpf/Cenpe/Kif22/Spdl1
BMDM specific, LPS reduced	GO:0051290	protein heterotetramerization	'5/116	47/20565	6.64714e-06	0.00150225	0.00126086	5	Hist1h4m/Rrm2/Hist1h3i/Hist1h3g/Hist1h3h
BMDM specific, LPS reduced	GO:0007059	chromosome segregation	'10/116	303/20565	8.55692e-06	0.00167855	0.00140883	10	Top2a/Birc5/Ccnb1/Cenpf/Racgap1/Cenpe/Kif22/Ect2/Ncaph/Spdl1
BMDM specific, LPS reduced	GO:0098813	nuclear chromosome segregation	'9/116	240/20565	8.91267e-06	0.00167855	0.00140883	9	Top2a/Ccnb1/Cenpf/Racgap1/Cenpe/Kif22/Ect2/Ncaph/Spdl1
BMDM specific, LPS reduced	GO:0000280	nuclear division	'11/116	385/20565	1.16421e-05	0.00202393	0.0016987	11	Tpx2/Cdkn1c/Top2a/Birc5/Ccnb1/Racgap1/Igf1/Cenpe/Kif22/Ncaph/Spdl1
BMDM specific, LPS reduced	GO:0051310	metaphase plate congression	'5/116	55/20565	1.45429e-05	0.00234763	0.00197039	5	Ccnb1/Cenpf/Cenpe/Kif22/Spdl1
BMDM specific, LPS reduced	GO:0008608	attachment of spindle microtubules to kinetochore	'4/116	30/20565	2.35156e-05	0.0033752	0.00283284	4	Ccnb1/Racgap1/Cenpe/Ect2
BMDM specific, LPS reduced	GO:0006334	nucleosome assembly	'6/116	103/20565	2.59059e-05	0.0033752	0.00283284	6	Hist1h4m/Hist1h3i/Hist1h3g/Hist1h1a/Hist1h3h/Hist1h1d
BMDM specific, LPS reduced	GO:0006335	DNA replication-dependent nucleosome assembly	'4/116	31/20565	2.68821e-05	0.0033752	0.00283284	4	Hist1h4m/Hist1h3i/Hist1h3g/Hist1h3h
BMDM specific, LPS reduced	GO:0034723	DNA replication-dependent nucleosome organization	'4/116	31/20565	2.68821e-05	0.0033752	0.00283284	4	Hist1h4m/Hist1h3i/Hist1h3g/Hist1h3h
BMDM specific, LPS reduced	GO:0048285	organelle fission	'11/116	433/20565	3.43739e-05	0.00401845	0.00337273	11	Tpx2/Cdkn1c/Top2a/Birc5/Ccnb1/Racgap1/Igf1/Cenpe/Kif22/Ncaph/Spdl1
BMDM specific, LPS reduced	GO:0048146	positive regulation of fibroblast proliferation	'5/116	66/20565	3.55615e-05	0.00401845	0.00337273	5	Gas6/Ccnb1/Ccna2/Igf1/E2f1
BMDM specific, LPS reduced	GO:0000819	sister chromatid segregation	'7/116	163/20565	3.90473e-05	0.00420223	0.00352698	7	Top2a/Ccnb1/Racgap1/Cenpe/Kif22/Ncaph/Spdl1
BMDM specific, LPS reduced	GO:0030100	regulation of endocytosis	'8/116	232/20565	5.18876e-05	0.00533027	0.00447376	8	Apoe/Gas6/Mfge8/Hist1h1a/Pparg/Lgals3/Hfe/Cd300a
BMDM specific, LPS reduced	GO:0031497	chromatin assembly	'6/116	121/20565	6.4137e-05	0.00630216	0.00528947	6	Hist1h4m/Hist1h3i/Hist1h3g/Hist1h1a/Hist1h3h/Hist1h1d
BMDM specific, LPS reduced	GO:0007080	mitotic metaphase plate congression	'4/116	40/20565	7.5083e-05	0.0067875	0.00569682	4	Ccnb1/Cenpe/Kif22/Spdl1
BMDM specific, LPS reduced	GO:0031577	spindle checkpoint	'4/116	40/20565	7.5083e-05	0.0067875	0.00569682	4	Birc5/Ccnb1/Cenpe/Spdl1
BMDM specific, LPS reduced	GO:0051656	establishment of organelle localization	'10/116	399/20565	8.86264e-05	0.00770368	0.00646578	10	Eya1/Spry2/Birc5/Ccnb1/Cenpf/1190002N15Rik/Cenpe/Kif22/Spdl1/Cd300a
BMDM specific, LPS reduced	GO:0044772	mitotic cell cycle phase transition	'9/116	326/20565	9.76531e-05	0.00817392	0.00686046	9	Gpnmb/Cdkn1c/Birc5/Ccnb1/Ccna2/Cenpf/Cenpe/E2f1/Iqgap3
BMDM specific, LPS reduced	GO:0034728	nucleosome organization	'6/116	132/20565	0.000103911	0.00838707	0.00703936	6	Hist1h4m/Hist1h3i/Hist1h3g/Hist1h1a/Hist1h3h/Hist1h1d
BMDM specific, LPS reduced	GO:0000070	mitotic sister chromatid segregation	'6/116	134/20565	0.000112886	0.00879733	0.00738369	6	Ccnb1/Racgap1/Cenpe/Kif22/Ncaph/Spdl1
BMDM specific, LPS reduced	GO:0006911	phagocytosis, engulfment	'4/116	45/20565	0.00011978	0.00902342	0.00757345	4	Mfge8/Pparg/Trem2/Cd300a
BMDM specific, LPS reduced	GO:0006333	chromatin assembly or disassembly	'6/116	143/20565	0.000161194	0.0117515	0.00986318	6	Hist1h4m/Hist1h3i/Hist1h3g/Hist1h1a/Hist1h3h/Hist1h1d
BMDM specific, LPS reduced	GO:0045807	positive regulation of endocytosis	'6/116	144/20565	0.000167437	0.0118252	0.00992505	6	Apoe/Gas6/Mfge8/Hist1h1a/Pparg/Hfe
BMDM specific, LPS reduced	GO:0044770	cell cycle phase transition	'9/116	353/20565	0.000177651	0.0121664	0.0102114	9	Gpnmb/Cdkn1c/Birc5/Ccnb1/Ccna2/Cenpf/Cenpe/E2f1/Iqgap3
BMDM specific, LPS reduced	GO:0007052	mitotic spindle organization	'5/116	96/20565	0.000212651	0.0141351	0.0118637	5	Tpx2/Birc5/Ccnb1/Racgap1/Cenpe
BMDM specific, LPS reduced	GO:0015914	phospholipid transport	'4/116	54/20565	0.000244504	0.0144622	0.0121383	4	Apoe/Abcb4/Kcnn4/Pltp
BMDM specific, LPS reduced	GO:0099024	plasma membrane invagination	'4/116	54/20565	0.000244504	0.0144622	0.0121383	4	Mfge8/Pparg/Trem2/Cd300a
BMDM specific, LPS reduced	GO:0032373	positive regulation of sterol transport	'3/116	22/20565	0.00024903	0.0144622	0.0121383	3	Apoe/Abcb4/Pltp
BMDM specific, LPS reduced	GO:0032376	positive regulation of cholesterol transport	'3/116	22/20565	0.00024903	0.0144622	0.0121383	3	Apoe/Abcb4/Pltp
BMDM specific, LPS reduced	GO:0051291	protein heterooligomerization	'6/116	155/20565	0.000249569	0.0144622	0.0121383	6	Hist1h4m/Col1a2/Rrm2/Hist1h3i/Hist1h3g/Hist1h3h
BMDM specific, LPS reduced	GO:0051262	protein tetramerization	'6/116	158/20565	0.000276711	0.0156342	0.0131219	6	Hist1h4m/Rrm2/Hist1h3i/Pfkm/Hist1h3g/Hist1h3h
BMDM specific, LPS reduced	GO:0000132	establishment of mitotic spindle orientation	'3/116	23/20565	0.000285209	0.0157213	0.013195	3	Eya1/Spry2/Spdl1
BMDM specific, LPS reduced	GO:0070371	ERK1 and ERK2 cascade	'8/116	299/20565	0.000297229	0.0159938	0.0134237	8	Gpnmb/Adra1a/Gas6/Spry2/Gpr183/Igf1/Trem2/Iqgap3
BMDM specific, LPS reduced	GO:1901990	regulation of mitotic cell cycle phase transition	'7/116	232/20565	0.000349453	0.0183666	0.0154153	7	Gpnmb/Cdkn1c/Birc5/Ccnb1/Cenpf/Cenpe/E2f1
BMDM specific, LPS reduced	GO:0051249	regulation of lymphocyte activation	'9/116	391/20565	0.000377045	0.0186754	0.0156745	9	Gpnmb/Gas6/Gpr183/Igf1/Il7r/Nck2/Lgals3/Hfe/Cd300a
BMDM specific, LPS reduced	GO:0000226	microtubule cytoskeleton organization	'10/116	479/20565	0.000385838	0.0186754	0.0156745	10	Eya1/Tpx2/Dnaaf3/Prc1/Spry2/Birc5/Ccnb1/Racgap1/Cenpe/Spdl1
BMDM specific, LPS reduced	GO:0007265	Ras protein signal transduction	'8/116	311/20565	0.000386526	0.0186754	0.0156745	8	Adra1a/Col1a2/Apoe/Spry2/Igf1/Ect2/Sh2b2/Iqgap3
BMDM specific, LPS reduced	GO:0010324	membrane invagination	'4/116	61/20565	0.00039141	0.0186754	0.0156745	4	Mfge8/Pparg/Trem2/Cd300a
BMDM specific, LPS reduced	GO:0065004	protein-DNA complex assembly	'6/116	169/20565	0.000396646	0.0186754	0.0156745	6	Hist1h4m/Hist1h3i/Hist1h3g/Hist1h1a/Hist1h3h/Hist1h1d
BMDM specific, LPS reduced	GO:0040001	establishment of mitotic spindle localization	'3/116	26/20565	0.000413585	0.0190755	0.0160103	3	Eya1/Spry2/Spdl1
BMDM specific, LPS reduced	GO:0000075	cell cycle checkpoint	'6/116	171/20565	0.000422249	0.0190857	0.0160188	6	Top2a/Birc5/Ccnb1/Cenpe/E2f1/Spdl1
BMDM specific, LPS reduced	GO:0051294	establishment of spindle orientation	'3/116	27/20565	0.000463376	0.0203484	0.0170787	3	Eya1/Spry2/Spdl1
BMDM specific, LPS reduced	GO:0007346	regulation of mitotic cell cycle	'10/116	491/20565	0.000468194	0.0203484	0.0170787	10	Gpnmb/Tpx2/Cdkn1c/Top2a/Birc5/Ccnb1/Cenpf/Igf1/Cenpe/E2f1
BMDM specific, LPS reduced	GO:0050851	antigen receptor-mediated signaling pathway	'5/116	116/20565	0.000510316	0.0216313	0.0181554	5	Kcnn4/Tec/Lgals3/Sh2b2/Cd300a
BMDM specific, LPS reduced	GO:0002021	response to dietary excess	'3/116	28/20565	0.000516854	0.0216313	0.0181554	3	Gdf3/Apoe/Pparg
BMDM specific, LPS reduced	GO:1901987	regulation of cell cycle phase transition	'7/116	254/20565	0.000600158	0.0246611	0.0206983	7	Gpnmb/Cdkn1c/Birc5/Ccnb1/Cenpf/Cenpe/E2f1
BMDM specific, LPS reduced	GO:0045786	negative regulation of cell cycle	'9/116	419/20565	0.00062033	0.0250348	0.0210119	9	Gpnmb/Hpgd/Cdkn1c/Top2a/Birc5/Ccnb1/Cenpe/E2f1/Spdl1
BMDM specific, LPS reduced	GO:0002683	negative regulation of immune system process	'9/116	426/20565	0.000697922	0.027672	0.0232254	9	Hist1h4m/Gpnmb/Tmem176b/Igf1/Il7r/Pparg/Lgals3/Hfe/Cd300a
BMDM specific, LPS reduced	GO:0015748	organophosphate ester transport	'4/116	72/20565	0.000735761	0.0284669	0.0238926	4	Apoe/Abcb4/Kcnn4/Pltp
BMDM specific, LPS reduced	GO:0000910	cytokinesis	'5/116	126/20565	0.000743162	0.0284669	0.0238926	5	Anln/Prc1/Birc5/Racgap1/Ect2
BMDM specific, LPS reduced	GO:0030261	chromosome condensation	'3/116	32/20565	0.000769798	0.0289957	0.0243364	3	Top2a/Ccnb1/Ncaph
BMDM specific, LPS reduced	GO:0051293	establishment of spindle localization	'3/116	34/20565	0.000921138	0.0341274	0.0286435	3	Eya1/Spry2/Spdl1
BMDM specific, LPS reduced	GO:0071824	protein-DNA complex subunit organization	'6/116	200/20565	0.000959775	0.0345616	0.0290079	6	Hist1h4m/Hist1h3i/Hist1h3g/Hist1h1a/Hist1h3h/Hist1h1d
BMDM specific, LPS reduced	GO:0042326	negative regulation of phosphorylation	'9/116	447/20565	0.000979617	0.0345616	0.0290079	9	Apoe/Cdkn1c/Fam129a/Spry2/Pbk/Ccnb1/Igf1/Nck2/Cd300a
BMDM specific, LPS reduced	GO:0070374	positive regulation of ERK1 and ERK2 cascade	'6/116	201/20565	0.000984825	0.0345616	0.0290079	6	Gpnmb/Adra1a/Gas6/Spry2/Gpr183/Trem2
BMDM specific, LPS reduced	GO:0051304	chromosome separation	'4/116	78/20565	0.000994029	0.0345616	0.0290079	4	Top2a/Ccnb1/Cenpe/Ncaph
BMDM specific, LPS reduced	GO:0070372	regulation of ERK1 and ERK2 cascade	'7/116	282/20565	0.00110626	0.0378811	0.031794	7	Gpnmb/Adra1a/Gas6/Spry2/Gpr183/Igf1/Trem2
BMDM specific, LPS reduced	GO:0050863	regulation of T cell activation	'7/116	283/20565	0.00112912	0.0380867	0.0319666	7	Gpnmb/Igf1/Il7r/Nck2/Lgals3/Hfe/Cd300a
BMDM specific, LPS reduced	GO:0046578	regulation of Ras protein signal transduction	'6/116	208/20565	0.00117456	0.038678	0.0324629	6	Adra1a/Apoe/Spry2/Igf1/Ect2/Sh2b2
BMDM specific, LPS reduced	GO:0050777	negative regulation of immune response	'5/116	140/20565	0.00119212	0.038678	0.0324629	5	Il7r/Pparg/Lgals3/Hfe/Cd300a
BMDM specific, LPS reduced	GO:0050764	regulation of phagocytosis	'4/116	82/20565	0.00119799	0.038678	0.0324629	4	Gas6/Mfge8/Pparg/Cd300a
BMDM specific, LPS reduced	GO:0015850	organic hydroxy compound transport	'6/116	211/20565	0.00126396	0.0397977	0.0334026	6	Apoe/Emb/Abcb4/Lgals3/Pltp/Cd300a
BMDM specific, LPS reduced	GO:0002429	immune response-activating cell surface receptor signaling pathway	'5/116	143/20565	0.00130987	0.0397977	0.0334026	5	Kcnn4/Tec/Lgals3/Sh2b2/Cd300a
BMDM specific, LPS reduced	GO:0019318	hexose metabolic process	'6/116	213/20565	0.00132639	0.0397977	0.0334026	6	Fabp5/Igfbp4/Pfkm/Pdk1/Igf1/Gale
BMDM specific, LPS reduced	GO:0002694	regulation of leukocyte activation	'9/116	467/20565	0.00132779	0.0397977	0.0334026	9	Gpnmb/Gas6/Gpr183/Igf1/Il7r/Nck2/Lgals3/Hfe/Cd300a
BMDM specific, LPS reduced	GO:0014062	regulation of serotonin secretion	'2/116	10/20565	0.00137812	0.0397977	0.0334026	2	Lgals3/Cd300a
BMDM specific, LPS reduced	GO:0034350	regulation of glial cell apoptotic process	'2/116	10/20565	0.00137812	0.0397977	0.0334026	2	Gas6/Igf1
BMDM specific, LPS reduced	GO:0050856	regulation of T cell receptor signaling pathway	'3/116	39/20565	0.00137827	0.0397977	0.0334026	3	Kcnn4/Lgals3/Cd300a
BMDM specific, LPS reduced	GO:0051653	spindle localization	'3/116	39/20565	0.00137827	0.0397977	0.0334026	3	Eya1/Spry2/Spdl1
BMDM specific, LPS reduced	GO:0050670	regulation of lymphocyte proliferation	'6/116	215/20565	0.00139116	0.0397977	0.0334026	6	Gpnmb/Gpr183/Igf1/Nck2/Lgals3/Cd300a
BMDM specific, LPS reduced	GO:0043410	positive regulation of MAPK cascade	'9/116	473/20565	0.00144978	0.0399249	0.0335094	9	Gpnmb/Adra1a/Igfbp4/Gas6/Spry2/Gpr183/Igf1/Trem2/Iqgap3
BMDM specific, LPS reduced	GO:0032944	regulation of mononuclear cell proliferation	'6/116	217/20565	0.00145831	0.0399249	0.0335094	6	Gpnmb/Gpr183/Igf1/Nck2/Lgals3/Cd300a
BMDM specific, LPS reduced	GO:0007088	regulation of mitotic nuclear division	'5/116	147/20565	0.00147997	0.0399249	0.0335094	5	Cdkn1c/Birc5/Ccnb1/Igf1/Cenpe
BMDM specific, LPS reduced	GO:0032371	regulation of sterol transport	'3/116	40/20565	0.00148394	0.0399249	0.0335094	3	Apoe/Abcb4/Pltp
BMDM specific, LPS reduced	GO:0032374	regulation of cholesterol transport	'3/116	40/20565	0.00148394	0.0399249	0.0335094	3	Apoe/Abcb4/Pltp
BMDM specific, LPS reduced	GO:1903037	regulation of leukocyte cell-cell adhesion	'7/116	298/20565	0.00151867	0.0403788	0.0338904	7	Gpnmb/Igf1/Il7r/Nck2/Lgals3/Hfe/Cd300a
BMDM specific, LPS reduced	GO:0007051	spindle organization	'5/116	149/20565	0.00157087	0.0407812	0.0342281	5	Tpx2/Birc5/Ccnb1/Racgap1/Cenpe
BMDM specific, LPS reduced	GO:0060627	regulation of vesicle-mediated transport	'9/116	479/20565	0.00158066	0.0407812	0.0342281	9	Apoe/Gas6/Mfge8/Hist1h1a/Pparg/Lgals3/Hfe/Cd300a/Tbc1d8
BMDM specific, LPS reduced	GO:0090068	positive regulation of cell cycle process	'6/116	221/20565	0.00160001	0.0407812	0.0342281	6	Birc5/Ccnb1/Racgap1/Igf1/Cenpe/Ect2
BMDM specific, LPS reduced	GO:0046651	lymphocyte proliferation	'7/116	301/20565	0.00160784	0.0407812	0.0342281	7	Gpnmb/Gpr183/Igf1/Il7r/Nck2/Lgals3/Cd300a
BMDM specific, LPS reduced	GO:0032943	mononuclear cell proliferation	'7/116	303/20565	0.00166951	0.0407812	0.0342281	7	Gpnmb/Gpr183/Igf1/Il7r/Nck2/Lgals3/Cd300a
BMDM specific, LPS reduced	GO:0034375	high-density lipoprotein particle remodeling	'2/116	11/20565	0.00167816	0.0407812	0.0342281	2	Apoe/Pltp
BMDM specific, LPS reduced	GO:0043568	positive regulation of insulin-like growth factor receptor signaling pathway	'2/116	11/20565	0.00167816	0.0407812	0.0342281	2	Igfbp4/Igf1
BMDM specific, LPS reduced	GO:0061615	glycolytic process through fructose-6-phosphate	'2/116	11/20565	0.00167816	0.0407812	0.0342281	2	Pfkm/Gale
BMDM specific, LPS reduced	GO:0033500	carbohydrate homeostasis	'6/116	225/20565	0.00175196	0.0411206	0.0345129	6	Gas6/Pfkm/Birc5/Igf1/Pparg/Sh2b2
BMDM specific, LPS reduced	GO:0042593	glucose homeostasis	'6/116	225/20565	0.00175196	0.0411206	0.0345129	6	Gas6/Pfkm/Birc5/Igf1/Pparg/Sh2b2
BMDM specific, LPS reduced	GO:0070663	regulation of leukocyte proliferation	'6/116	225/20565	0.00175196	0.0411206	0.0345129	6	Gpnmb/Gpr183/Igf1/Nck2/Lgals3/Cd300a
BMDM specific, LPS reduced	GO:0043409	negative regulation of MAPK cascade	'5/116	153/20565	0.00176491	0.0411206	0.0345129	5	Apoe/Spry2/Pbk/Igf1/Cd300a
BMDM specific, LPS reduced	GO:0002768	immune response-regulating cell surface receptor signaling pathway	'5/116	154/20565	0.00181605	0.0418449	0.0351208	5	Kcnn4/Tec/Lgals3/Sh2b2/Cd300a
BMDM specific, LPS reduced	GO:0051983	regulation of chromosome segregation	'4/116	92/20565	0.00183303	0.0418449	0.0351208	4	Ccnb1/Racgap1/Cenpe/Ect2
BMDM specific, LPS reduced	GO:0032147	activation of protein kinase activity	'6/116	231/20565	0.00200014	0.0448953	0.0376811	6	Gas6/Tpx2/Igf1/Ect2/Iqgap3/Cd300a
BMDM specific, LPS reduced	GO:0032799	low-density lipoprotein receptor particle metabolic process	'2/116	12/20565	0.00200638	0.0448953	0.0376811	2	Apoe/Pparg
BMDM specific, LPS reduced	GO:0001933	negative regulation of protein phosphorylation	'8/116	405/20565	0.00211139	0.0464425	0.0389797	8	Apoe/Fam129a/Spry2/Pbk/Ccnb1/Igf1/Nck2/Cd300a
BMDM specific, LPS reduced	GO:0070661	leukocyte proliferation	'7/116	316/20565	0.00211663	0.0464425	0.0389797	7	Gpnmb/Gpr183/Igf1/Il7r/Nck2/Lgals3/Cd300a
BMDM specific, LPS reduced	GO:0006090	pyruvate metabolic process	'4/116	97/20565	0.00222458	0.0474721	0.0398439	4	Pfkm/Pdk1/Igf1/Gale
BMDM specific, LPS reduced	GO:0000281	mitotic cytokinesis	'3/116	46/20565	0.0022247	0.0474721	0.0398439	3	Anln/Racgap1/Ect2
BMDM specific, LPS reduced	GO:0051056	regulation of small GTPase mediated signal transduction	'6/116	236/20565	0.00222657	0.0474721	0.0398439	6	Adra1a/Apoe/Spry2/Igf1/Ect2/Sh2b2
BMDM specific, LPS reduced	GO:0009143	nucleoside triphosphate catabolic process	'2/116	13/20565	0.00236245	0.0485376	0.0407382	2	Smpdl3a/Dut
BMDM specific, LPS reduced	GO:0009263	deoxyribonucleotide biosynthetic process	'2/116	13/20565	0.00236245	0.0485376	0.0407382	2	Rrm2/Dut
BMDM specific, LPS reduced	GO:0032060	bleb assembly	'2/116	13/20565	0.00236245	0.0485376	0.0407382	2	Anln/Emp3
BMDM specific, LPS reduced	GO:1901626	regulation of postsynaptic membrane organization	'2/116	13/20565	0.00236245	0.0485376	0.0407382	2	Apoe/Rapsn
PM specific, LPS induced	GO:0072593	reactive oxygen species metabolic process	'14/99	253/20565	1.90436e-11	4.79519e-08	3.61428e-08	14	Cyp1b1/Cxcl1/Thbs1/Cd177/Ptgs2/Egfr/Pdgfrb/Slc7a2/Cyb5r4/Met/Ass1/Ddit4/Lrrk2/Il19
PM specific, LPS induced	GO:2000379	positive regulation of reactive oxygen species metabolic process	'8/99	100/20565	2.79787e-08	3.52252e-05	2.65503e-05	8	Cyp1b1/Cxcl1/Thbs1/Cd177/Ptgs2/Egfr/Pdgfrb/Ass1
PM specific, LPS induced	GO:0032103	positive regulation of response to external stimulus	'10/99	271/20565	7.4356e-07	0.000624095	0.0004704	10	Cxcl5/Cxcl1/Thbs1/Ptgs2/Egfr/Adora2b/Pdgfrb/Tgm2/Pf4/Met
PM specific, LPS induced	GO:0009611	response to wounding	'12/99	437/20565	1.26955e-06	0.000799185	0.00060237	12	Tgfb2/F5/Thbs1/Slc1a2/Plet1/Egfr/F3/Pf4/Slc7a11/Flrt3/Epha4/Adrb2
PM specific, LPS induced	GO:0030335	positive regulation of cell migration	'12/99	458/20565	2.06693e-06	0.000988356	0.000744954	12	Cxcl5/Cyp1b1/Cxcl1/Tgfb2/Thbs1/Plet1/Ptgs2/Egfr/F3/Pdgfrb/Pf4/Met
PM specific, LPS induced	GO:2000377	regulation of reactive oxygen species metabolic process	'8/99	179/20565	2.45691e-06	0.000988356	0.000744954	8	Cyp1b1/Cxcl1/Thbs1/Cd177/Ptgs2/Egfr/Pdgfrb/Ass1
PM specific, LPS induced	GO:2000147	positive regulation of cell motility	'12/99	476/20565	3.07446e-06	0.000988356	0.000744954	12	Cxcl5/Cyp1b1/Cxcl1/Tgfb2/Thbs1/Plet1/Ptgs2/Egfr/F3/Pdgfrb/Pf4/Met
PM specific, LPS induced	GO:0050920	regulation of chemotaxis	'8/99	185/20565	3.14013e-06	0.000988356	0.000744954	8	Cxcl5/Cxcl1/Thbs1/Pdgfrb/Pf4/Agrn/Met/Efnb2
PM specific, LPS induced	GO:0051272	positive regulation of cellular component movement	'12/99	490/20565	4.13598e-06	0.00115716	0.000872184	12	Cxcl5/Cyp1b1/Cxcl1/Tgfb2/Thbs1/Plet1/Ptgs2/Egfr/F3/Pdgfrb/Pf4/Met
PM specific, LPS induced	GO:1901342	regulation of vasculature development	'9/99	264/20565	5.22559e-06	0.0013158	0.000991762	9	Cyp1b1/Thbs1/Ptgs2/F3/Adora2b/Pf4/Lif/Efnb2/Adrb2
PM specific, LPS induced	GO:0010738	regulation of protein kinase A signaling	'4/99	27/20565	8.14423e-06	0.00158912	0.00119777	4	Adgrv1/Calcr/Lrrk2/Adrb2
PM specific, LPS induced	GO:0071634	regulation of transforming growth factor beta production	'4/99	27/20565	8.14423e-06	0.00158912	0.00119777	4	Tgfb2/Thbs1/Ptgs2/Met
PM specific, LPS induced	GO:0033135	regulation of peptidyl-serine phosphorylation	'7/99	151/20565	8.47076e-06	0.00158912	0.00119777	7	Ptgs2/Egfr/Calcr/Met/Lif/Ddit4/Csf3
PM specific, LPS induced	GO:0051098	regulation of binding	'10/99	358/20565	8.89139e-06	0.00158912	0.00119777	10	Tgfb2/Zbtb7c/Agrn/Met/Lif/Epha4/Slpi/Lrrk2/Csf3/Adrb2
PM specific, LPS induced	GO:0071604	transforming growth factor beta production	'4/99	28/20565	9.46658e-06	0.00158912	0.00119777	4	Tgfb2/Thbs1/Ptgs2/Met
PM specific, LPS induced	GO:0002443	leukocyte mediated immunity	'9/99	306/20565	1.70401e-05	0.00261675	0.00197232	9	Cxcl5/Cxcl1/Crlf2/H2-Q7/H2-Ab1/Cd177/Slamf6/C1rl/Adora2b
PM specific, LPS induced	GO:0001819	positive regulation of cytokine production	'10/99	391/20565	1.90512e-05	0.00261675	0.00197232	10	Cyp1b1/H2-Q7/Thbs1/Slamf6/Ptgs2/Adora2b/Pf4/Il1f6/Clec4e/Csf2
PM specific, LPS induced	GO:0045765	regulation of angiogenesis	'8/99	238/20565	1.9798e-05	0.00261675	0.00197232	8	Cyp1b1/Thbs1/Ptgs2/F3/Adora2b/Pf4/Lif/Adrb2
PM specific, LPS induced	GO:0050730	regulation of peptidyl-tyrosine phosphorylation	'8/99	240/20565	2.10239e-05	0.00261675	0.00197232	8	Areg/Egfr/Pdgfrb/Agrn/Lif/Epha4/Csf3/Csf2
PM specific, LPS induced	GO:0006809	nitric oxide biosynthetic process	'5/99	70/20565	2.20583e-05	0.00261675	0.00197232	5	Cyp1b1/Ptgs2/Egfr/Slc7a2/Ass1
PM specific, LPS induced	GO:0002274	myeloid leukocyte activation	'7/99	176/20565	2.29111e-05	0.00261675	0.00197232	7	Cxcl5/Thbs1/Cd177/Pilrb1/Adora2b/Slc7a2/Csf2
PM specific, LPS induced	GO:0010739	positive regulation of protein kinase A signaling	'3/99	12/20565	2.30692e-05	0.00261675	0.00197232	3	Adgrv1/Calcr/Adrb2
PM specific, LPS induced	GO:0033138	positive regulation of peptidyl-serine phosphorylation	'6/99	119/20565	2.3902e-05	0.00261675	0.00197232	6	Ptgs2/Egfr/Calcr/Met/Lif/Csf3
PM specific, LPS induced	GO:0010737	protein kinase A signaling	'4/99	36/20565	2.64421e-05	0.00272599	0.00205466	4	Adgrv1/Calcr/Lrrk2/Adrb2
PM specific, LPS induced	GO:0046209	nitric oxide metabolic process	'5/99	73/20565	2.7065e-05	0.00272599	0.00205466	5	Cyp1b1/Ptgs2/Egfr/Slc7a2/Ass1
PM specific, LPS induced	GO:2001057	reactive nitrogen species metabolic process	'5/99	78/20565	3.73243e-05	0.00361471	0.00272452	5	Cyp1b1/Ptgs2/Egfr/Slc7a2/Ass1
PM specific, LPS induced	GO:0050921	positive regulation of chemotaxis	'6/99	134/20565	4.6657e-05	0.00435119	0.00327963	6	Cxcl5/Cxcl1/Thbs1/Pdgfrb/Pf4/Met
PM specific, LPS induced	GO:0001525	angiogenesis	'10/99	437/20565	4.89006e-05	0.00436761	0.003292	10	Cyp1b1/Thbs1/Ptgs2/F3/Adora2b/Pdgfrb/Pf4/Lif/Efnb2/Adrb2
PM specific, LPS induced	GO:1900182	positive regulation of protein localization to nucleus	'6/99	136/20565	5.06875e-05	0.00436761	0.003292	6	Tgfb2/Ptgs2/Egfr/Lif/Lrrk2/Csf3
PM specific, LPS induced	GO:0042060	wound healing	'9/99	353/20565	5.20366e-05	0.00436761	0.003292	9	Tgfb2/F5/Thbs1/Plet1/Egfr/F3/Pf4/Slc7a11/Adrb2
PM specific, LPS induced	GO:0051852	disruption by host of symbiont cells	'3/99	16/20565	5.79052e-05	0.00441834	0.00333024	3	Cxcl5/Cxcl1/Pf4
PM specific, LPS induced	GO:0051873	killing by host of symbiont cells	'3/99	16/20565	5.79052e-05	0.00441834	0.00333024	3	Cxcl5/Cxcl1/Pf4
PM specific, LPS induced	GO:1902475	L-alpha-amino acid transmembrane transport	'3/99	16/20565	5.79052e-05	0.00441834	0.00333024	3	Slc1a2/Slc7a2/Slc7a11
PM specific, LPS induced	GO:0051897	positive regulation of protein kinase B signaling	'5/99	86/20565	5.97308e-05	0.00442359	0.0033342	5	Thbs1/Egfr/F3/Calcr/Csf3
PM specific, LPS induced	GO:0051346	negative regulation of hydrolase activity	'9/99	362/20565	6.3155e-05	0.00454355	0.00342462	9	Tgfb2/Thbs1/Sh2d4a/Ptgs2/Serpinb1a/Agrn/Serpinb1b/Slpi/Lrrk2
PM specific, LPS induced	GO:0032930	positive regulation of superoxide anion generation	'3/99	17/20565	7.00679e-05	0.00466388	0.00351531	3	Cxcl1/Cd177/Egfr
PM specific, LPS induced	GO:1904424	regulation of GTP binding	'3/99	17/20565	7.00679e-05	0.00466388	0.00351531	3	Tgfb2/Met/Epha4
PM specific, LPS induced	GO:0048644	muscle organ morphogenesis	'5/99	89/20565	7.03842e-05	0.00466388	0.00351531	5	Fzd1/Tgfb2/Ly6e/Adarb1/Lif
PM specific, LPS induced	GO:0048661	positive regulation of smooth muscle cell proliferation	'5/99	92/20565	8.24456e-05	0.00532302	0.00401213	5	Thbs1/Ptgs2/Egfr/Pdgfrb/Tgm2
PM specific, LPS induced	GO:0043393	regulation of protein binding	'7/99	217/20565	8.65272e-05	0.00544689	0.00410549	7	Agrn/Met/Epha4/Slpi/Lrrk2/Csf3/Adrb2
PM specific, LPS induced	GO:0007517	muscle organ development	'9/99	379/20565	8.96642e-05	0.00550669	0.00415057	9	Fzd1/Tgfb2/Boc/Ly6e/Adarb1/Met/Lif/Efnb2/Adrb2
PM specific, LPS induced	GO:0043410	positive regulation of MAPK cascade	'10/99	473/20565	9.43489e-05	0.00565644	0.00426343	10	Tgfb2/Thbs1/Egfr/Pdgfrb/Calcr/Met/Lif/Epha4/Lrrk2/Adrb2
PM specific, LPS induced	GO:0002886	regulation of myeloid leukocyte mediated immunity	'4/99	50/20565	9.81802e-05	0.00574925	0.00433339	4	Cxcl5/Cxcl1/Cd177/Adora2b
PM specific, LPS induced	GO:1900180	regulation of protein localization to nucleus	'7/99	225/20565	0.000108437	0.00598556	0.00451151	7	Fzd1/Tgfb2/Ptgs2/Egfr/Lif/Lrrk2/Csf3
PM specific, LPS induced	GO:0018108	peptidyl-tyrosine phosphorylation	'8/99	304/20565	0.000111076	0.00598556	0.00451151	8	Areg/Egfr/Pdgfrb/Agrn/Lif/Epha4/Csf3/Csf2
PM specific, LPS induced	GO:0045986	negative regulation of smooth muscle contraction	'3/99	20/20565	0.000116241	0.00598556	0.00451151	3	Ptgs2/Adora2b/Adrb2
PM specific, LPS induced	GO:0051818	disruption of cells of other organism involved in symbiotic interaction	'3/99	20/20565	0.000116241	0.00598556	0.00451151	3	Cxcl5/Cxcl1/Pf4
PM specific, LPS induced	GO:0051883	killing of cells in other organism involved in symbiotic interaction	'3/99	20/20565	0.000116241	0.00598556	0.00451151	3	Cxcl5/Cxcl1/Pf4
PM specific, LPS induced	GO:0051054	positive regulation of DNA metabolic process	'7/99	228/20565	0.000117735	0.00598556	0.00451151	7	Cyp1b1/Areg/Egfr/Pdgfrb/Met/Dnmt3l/Csf2
PM specific, LPS induced	GO:0018212	peptidyl-tyrosine modification	'8/99	307/20565	0.000118856	0.00598556	0.00451151	8	Areg/Egfr/Pdgfrb/Agrn/Lif/Epha4/Csf3/Csf2
PM specific, LPS induced	GO:0071622	regulation of granulocyte chemotaxis	'4/99	53/20565	0.000123464	0.00609573	0.00459454	4	Cxcl5/Cxcl1/Thbs1/Pf4
PM specific, LPS induced	GO:0032928	regulation of superoxide anion generation	'3/99	21/20565	0.000135141	0.00654394	0.00493237	3	Cxcl1/Cd177/Egfr
PM specific, LPS induced	GO:1903409	reactive oxygen species biosynthetic process	'5/99	103/20565	0.000140768	0.00665021	0.00501247	5	Cyp1b1/Ptgs2/Egfr/Slc7a2/Ass1
PM specific, LPS induced	GO:0006959	humoral immune response	'6/99	164/20565	0.000142618	0.00665021	0.00501247	6	Cxcl5/Traf3ip2/H2-Ab1/C1rl/Pf4/Slpi
PM specific, LPS induced	GO:0019935	cyclic-nucleotide-mediated signaling	'5/99	104/20565	0.000147318	0.00665985	0.00501974	5	Thbs1/Adora2b/Pf4/Calcr/Adrb2
PM specific, LPS induced	GO:0018105	peptidyl-serine phosphorylation	'8/99	317/20565	0.000148114	0.00665985	0.00501974	8	Ptgs2/Egfr/Calcr/Met/Lif/Ddit4/Lrrk2/Csf3
PM specific, LPS induced	GO:0001890	placenta development	'6/99	166/20565	0.00015237	0.0067192	0.00506447	6	Ptgs2/Egfr/Met/Dnmt3l/Lif/Csf2
PM specific, LPS induced	GO:0046425	regulation of JAK-STAT cascade	'6/99	167/20565	0.000157439	0.0067192	0.00506447	6	Cxcl5/Cyp1b1/Lif/Flrt3/Cish/Csf2
PM specific, LPS induced	GO:1904892	regulation of STAT cascade	'6/99	167/20565	0.000157439	0.0067192	0.00506447	6	Cxcl5/Cyp1b1/Lif/Flrt3/Cish/Csf2
PM specific, LPS induced	GO:0045740	positive regulation of DNA replication	'4/99	57/20565	0.000164114	0.00688731	0.00519118	4	Areg/Egfr/Met/Csf2
PM specific, LPS induced	GO:0006801	superoxide metabolic process	'4/99	58/20565	0.000175623	0.00713256	0.00537603	4	Cxcl1/Cd177/Egfr/Cyb5r4
PM specific, LPS induced	GO:0035904	aorta development	'4/99	58/20565	0.000175623	0.00713256	0.00537603	4	Tgfb2/Ltbp1/Pdgfrb/Efnb2
PM specific, LPS induced	GO:0045860	positive regulation of protein kinase activity	'9/99	418/20565	0.000187302	0.00748612	0.00564252	9	Tgfb2/Thbs1/Egfr/Pdgfrb/Agrn/Met/Epha4/Lrrk2/Adrb2
PM specific, LPS induced	GO:0050731	positive regulation of peptidyl-tyrosine phosphorylation	'6/99	175/20565	0.000202987	0.00788379	0.00594225	6	Areg/Agrn/Lif/Epha4/Csf3/Csf2
PM specific, LPS induced	GO:0010575	positive regulation of vascular endothelial growth factor production	'3/99	24/20565	0.000203513	0.00788379	0.00594225	3	Cyp1b1/Ptgs2/Adora2b
PM specific, LPS induced	GO:1903825	organic acid transmembrane transport	'4/99	61/20565	0.000213646	0.00802928	0.00605191	4	Thbs1/Slc1a2/Slc7a2/Slc7a11
PM specific, LPS induced	GO:1905039	carboxylic acid transmembrane transport	'4/99	61/20565	0.000213646	0.00802928	0.00605191	4	Thbs1/Slc1a2/Slc7a2/Slc7a11
PM specific, LPS induced	GO:0002697	regulation of immune effector process	'8/99	337/20565	0.000224577	0.00831596	0.00626799	8	Cxcl5/Cxcl1/Tgfb2/H2-Q7/Traf3ip2/Cd177/Slamf6/Adora2b
PM specific, LPS induced	GO:0018209	peptidyl-serine modification	'8/99	338/20565	0.00022912	0.00836122	0.00630211	8	Ptgs2/Egfr/Calcr/Met/Lif/Ddit4/Lrrk2/Csf3
PM specific, LPS induced	GO:0007259	JAK-STAT cascade	'6/99	181/20565	0.000243515	0.00851627	0.00641898	6	Cxcl5/Cyp1b1/Lif/Flrt3/Cish/Csf2
PM specific, LPS induced	GO:0007596	blood coagulation	'6/99	181/20565	0.000243515	0.00851627	0.00641898	6	F5/Thbs1/F3/Pf4/Slc7a11/Adrb2
PM specific, LPS induced	GO:0097696	STAT cascade	'6/99	181/20565	0.000243515	0.00851627	0.00641898	6	Cxcl5/Cyp1b1/Lif/Flrt3/Cish/Csf2
PM specific, LPS induced	GO:0007599	hemostasis	'6/99	183/20565	0.000258354	0.00891145	0.00671684	6	F5/Thbs1/F3/Pf4/Slc7a11/Adrb2
PM specific, LPS induced	GO:0050817	coagulation	'6/99	184/20565	0.000266036	0.0090524	0.00682307	6	F5/Thbs1/F3/Pf4/Slc7a11/Adrb2
PM specific, LPS induced	GO:0007411	axon guidance	'6/99	185/20565	0.000273895	0.00915802	0.00690269	6	Tgfb2/Boc/Agrn/Flrt3/Efnb2/Epha4
PM specific, LPS induced	GO:0002705	positive regulation of leukocyte mediated immunity	'5/99	119/20565	0.000276414	0.00915802	0.00690269	5	Cxcl1/H2-Q7/Cd177/Slamf6/Adora2b
PM specific, LPS induced	GO:0060326	cell chemotaxis	'7/99	263/20565	0.00028262	0.00924204	0.00696601	7	Cxcl5/Cxcl1/Thbs1/Pdgfrb/Pf4/Met/Saa3
PM specific, LPS induced	GO:0097485	neuron projection guidance	'6/99	187/20565	0.000290163	0.00936705	0.00706023	6	Tgfb2/Boc/Agrn/Flrt3/Efnb2/Epha4
PM specific, LPS induced	GO:0002703	regulation of leukocyte mediated immunity	'6/99	188/20565	0.000298576	0.00951663	0.00717298	6	Cxcl5/Cxcl1/H2-Q7/Cd177/Slamf6/Adora2b
PM specific, LPS induced	GO:0051099	positive regulation of binding	'6/99	190/20565	0.000315977	0.00994537	0.00749613	6	Tgfb2/Agrn/Met/Epha4/Lrrk2/Csf3
PM specific, LPS induced	GO:0001910	regulation of leukocyte mediated cytotoxicity	'4/99	68/20565	0.000324936	0.0101011	0.00761351	4	Cxcl5/Cxcl1/H2-Q7/Slamf6
PM specific, LPS induced	GO:0033674	positive regulation of kinase activity	'9/99	454/20565	0.000344199	0.0105694	0.00796652	9	Tgfb2/Thbs1/Egfr/Pdgfrb/Agrn/Met/Epha4/Lrrk2/Adrb2
PM specific, LPS induced	GO:0090023	positive regulation of neutrophil chemotaxis	'3/99	29/20565	0.000361051	0.0109533	0.00825586	3	Cxcl5/Cxcl1/Pf4
PM specific, LPS induced	GO:0046427	positive regulation of JAK-STAT cascade	'4/99	71/20565	0.000383428	0.0111847	0.00843024	4	Cxcl5/Cyp1b1/Lif/Csf2
PM specific, LPS induced	GO:1904894	positive regulation of STAT cascade	'4/99	71/20565	0.000383428	0.0111847	0.00843024	4	Cxcl5/Cyp1b1/Lif/Csf2
PM specific, LPS induced	GO:0001906	cell killing	'5/99	128/20565	0.000387004	0.0111847	0.00843024	5	Cxcl5/Cxcl1/H2-Q7/Slamf6/Pf4
PM specific, LPS induced	GO:0002446	neutrophil mediated immunity	'3/99	30/20565	0.00039977	0.0111847	0.00843024	3	Cxcl5/Cxcl1/Cd177
PM specific, LPS induced	GO:0042554	superoxide anion generation	'3/99	30/20565	0.00039977	0.0111847	0.00843024	3	Cxcl1/Cd177/Egfr
PM specific, LPS induced	GO:0045932	negative regulation of muscle contraction	'3/99	30/20565	0.00039977	0.0111847	0.00843024	3	Ptgs2/Adora2b/Adrb2
PM specific, LPS induced	GO:0090322	regulation of superoxide metabolic process	'3/99	30/20565	0.00039977	0.0111847	0.00843024	3	Cxcl1/Cd177/Egfr
PM specific, LPS induced	GO:0051384	response to glucocorticoid	'4/99	72/20565	0.000404494	0.0111925	0.00843612	4	Areg/Calcr/Ass1/Ddit4
PM specific, LPS induced	GO:0097530	granulocyte migration	'5/99	131/20565	0.000430417	0.0114494	0.00862977	5	Cxcl5/Cxcl1/Thbs1/Cd177/Pf4
PM specific, LPS induced	GO:0098542	defense response to other organism	'9/99	469/20565	0.00043581	0.0114494	0.00862977	9	Cxcl5/Cxcl1/Clec4d/H2-Q7/Traf3ip2/Pf4/Ddit4/Slpi/Clec4e
PM specific, LPS induced	GO:0002573	myeloid leukocyte differentiation	'6/99	202/20565	0.000437772	0.0114494	0.00862977	6	Pilrb1/Pf4/Calcr/Lif/Csf3/Csf2
PM specific, LPS induced	GO:0002888	positive regulation of myeloid leukocyte mediated immunity	'3/99	31/20565	0.000441061	0.0114494	0.00862977	3	Cxcl1/Cd177/Adora2b
PM specific, LPS induced	GO:0010574	regulation of vascular endothelial growth factor production	'3/99	31/20565	0.000441061	0.0114494	0.00862977	3	Cyp1b1/Ptgs2/Adora2b
PM specific, LPS induced	GO:0071624	positive regulation of granulocyte chemotaxis	'3/99	31/20565	0.000441061	0.0114494	0.00862977	3	Cxcl5/Cxcl1/Pf4
PM specific, LPS induced	GO:0070997	neuron death	'8/99	375/20565	0.000458689	0.0117855	0.00888309	8	Fzd1/Tgfb2/Agrn/Adarb1/Efnb2/Ddit4/Lrrk2/Csf3
PM specific, LPS induced	GO:0031960	response to corticosteroid	'4/99	75/20565	0.000472647	0.0119021	0.008971	4	Areg/Calcr/Ass1/Ddit4
PM specific, LPS induced	GO:0033002	muscle cell proliferation	'6/99	205/20565	0.00047329	0.0119021	0.008971	6	Tgfb2/Thbs1/Ptgs2/Egfr/Pdgfrb/Tgm2
PM specific, LPS induced	GO:0034614	cellular response to reactive oxygen species	'5/99	134/20565	0.000477408	0.0119021	0.008971	5	Cyp1b1/Thbs1/Egfr/Met/Lrrk2
PM specific, LPS induced	GO:0035909	aorta morphogenesis	'3/99	32/20565	0.000484993	0.0119727	0.00902418	3	Tgfb2/Pdgfrb/Efnb2
PM specific, LPS induced	GO:0051896	regulation of protein kinase B signaling	'5/99	135/20565	0.0004939	0.0120506	0.0090829	5	Thbs1/Egfr/F3/Calcr/Csf3
PM specific, LPS induced	GO:0071902	positive regulation of protein serine/threonine kinase activity	'7/99	289/20565	0.000497721	0.0120506	0.0090829	7	Thbs1/Egfr/Pdgfrb/Met/Epha4/Lrrk2/Adrb2
PM specific, LPS induced	GO:0010573	vascular endothelial growth factor production	'3/99	33/20565	0.000531635	0.0127288	0.00959409	3	Cyp1b1/Ptgs2/Adora2b
PM specific, LPS induced	GO:0043406	positive regulation of MAP kinase activity	'6/99	210/20565	0.000537444	0.0127288	0.00959409	6	Thbs1/Egfr/Pdgfrb/Met/Epha4/Lrrk2
PM specific, LPS induced	GO:0010035	response to inorganic substance	'8/99	385/20565	0.000545472	0.0127288	0.00959409	8	Cyp1b1/Thbs1/Adgrv1/Egfr/Met/Ass1/Hvcn1/Lrrk2
PM specific, LPS induced	GO:0071241	cellular response to inorganic substance	'5/99	138/20565	0.000545953	0.0127288	0.00959409	5	Thbs1/Adgrv1/Egfr/Hvcn1/Lrrk2
PM specific, LPS induced	GO:0048660	regulation of smooth muscle cell proliferation	'5/99	140/20565	0.000582878	0.0133617	0.0100711	5	Thbs1/Ptgs2/Egfr/Pdgfrb/Tgm2
PM specific, LPS induced	GO:0010959	regulation of metal ion transport	'8/99	389/20565	0.000583713	0.0133617	0.0100711	8	Cxcl1/Sestd1/Tgfb2/Ptgs2/Pdgfrb/Agrn/Calcr/Adrb2
PM specific, LPS induced	GO:0030816	positive regulation of cAMP metabolic process	'4/99	80/20565	0.000603838	0.0136979	0.0103245	4	Adora2b/Pf4/Calcr/Adrb2
PM specific, LPS induced	GO:0060415	muscle tissue morphogenesis	'4/99	81/20565	0.00063288	0.0138578	0.0104451	4	Fzd1/Tgfb2/Ly6e/Adarb1
PM specific, LPS induced	GO:1903524	positive regulation of blood circulation	'4/99	81/20565	0.00063288	0.0138578	0.0104451	4	Tgfb2/Ptgs2/Egfr/Adrb2
PM specific, LPS induced	GO:0090022	regulation of neutrophil chemotaxis	'3/99	35/20565	0.000633316	0.0138578	0.0104451	3	Cxcl5/Cxcl1/Pf4
PM specific, LPS induced	GO:1902624	positive regulation of neutrophil migration	'3/99	35/20565	0.000633316	0.0138578	0.0104451	3	Cxcl5/Cxcl1/Pf4
PM specific, LPS induced	GO:1900542	regulation of purine nucleotide metabolic process	'6/99	217/20565	0.000638408	0.0138578	0.0104451	6	Thbs1/Adora2b/Pf4/Calcr/Ddit4/Adrb2
PM specific, LPS induced	GO:0044057	regulation of system process	'9/99	496/20565	0.000651178	0.0140142	0.010563	9	Anxa6/Tgfb2/Ptgs2/Egfr/Adora2b/Agrn/Acpp/Lif/Adrb2
PM specific, LPS induced	GO:0002444	myeloid leukocyte mediated immunity	'4/99	82/20565	0.000662898	0.0141456	0.010662	4	Cxcl5/Cxcl1/Cd177/Adora2b
PM specific, LPS induced	GO:0048659	smooth muscle cell proliferation	'5/99	145/20565	0.000683386	0.0144403	0.0108841	5	Thbs1/Ptgs2/Egfr/Pdgfrb/Tgm2
PM specific, LPS induced	GO:0030225	macrophage differentiation	'3/99	36/20565	0.000688487	0.0144403	0.0108841	3	Pf4/Lif/Csf3
PM specific, LPS induced	GO:0031341	regulation of cell killing	'4/99	83/20565	0.000693913	0.0144403	0.0108841	4	Cxcl5/Cxcl1/H2-Q7/Slamf6
PM specific, LPS induced	GO:0006140	regulation of nucleotide metabolic process	'6/99	224/20565	0.000753512	0.0155382	0.0117116	6	Thbs1/Adora2b/Pf4/Calcr/Ddit4/Adrb2
PM specific, LPS induced	GO:0035239	tube morphogenesis	'8/99	405/20565	0.000759012	0.0155382	0.0117116	8	Fzd1/Tgfb2/Areg/Egfr/Tgm2/Met/Efnb2/Epha4
PM specific, LPS induced	GO:0006937	regulation of muscle contraction	'5/99	149/20565	0.000772712	0.015691	0.0118268	5	Anxa6/Ptgs2/Adora2b/Agrn/Adrb2
PM specific, LPS induced	GO:0016525	negative regulation of angiogenesis	'4/99	86/20565	0.000793112	0.0157679	0.0118847	4	Thbs1/Pf4/Lif/Adrb2
PM specific, LPS induced	GO:0045861	negative regulation of proteolysis	'7/99	313/20565	0.000796902	0.0157679	0.0118847	7	Thbs1/Ptgs2/Serpinb1a/Epha4/Serpinb1b/Slpi/Lrrk2
PM specific, LPS induced	GO:0007435	salivary gland morphogenesis	'3/99	38/20565	0.000807807	0.0157679	0.0118847	3	Egfr/Tgm2/Met
PM specific, LPS induced	GO:0031640	killing of cells of other organism	'3/99	38/20565	0.000807807	0.0157679	0.0118847	3	Cxcl5/Cxcl1/Pf4
PM specific, LPS induced	GO:0044364	disruption of cells of other organism	'3/99	38/20565	0.000807807	0.0157679	0.0118847	3	Cxcl5/Cxcl1/Pf4
PM specific, LPS induced	GO:0002690	positive regulation of leukocyte chemotaxis	'4/99	87/20565	0.000828291	0.0158003	0.0119092	4	Cxcl5/Cxcl1/Thbs1/Pf4
PM specific, LPS induced	GO:0014066	regulation of phosphatidylinositol 3-kinase signaling	'4/99	87/20565	0.000828291	0.0158003	0.0119092	4	Tgfb2/Egfr/Pdgfrb/Csf3
PM specific, LPS induced	GO:0034766	negative regulation of ion transmembrane transport	'4/99	87/20565	0.000828291	0.0158003	0.0119092	4	Sestd1/Tgfb2/Thbs1/Agrn
PM specific, LPS induced	GO:0010038	response to metal ion	'6/99	229/20565	0.000845108	0.0159999	0.0120596	6	Thbs1/Adgrv1/Egfr/Ass1/Hvcn1/Lrrk2
PM specific, LPS induced	GO:0036473	cell death in response to oxidative stress	'4/99	88/20565	0.000864558	0.0161463	0.01217	4	Cyp1b1/Fzd1/Met/Lrrk2
PM specific, LPS induced	GO:0030799	regulation of cyclic nucleotide metabolic process	'5/99	153/20565	0.000870488	0.0161463	0.01217	5	Thbs1/Adora2b/Pf4/Calcr/Adrb2
PM specific, LPS induced	GO:0032965	regulation of collagen biosynthetic process	'3/99	39/20565	0.000872081	0.0161463	0.01217	3	Ltbp1/Adora2b/Pdgfrb
PM specific, LPS induced	GO:2000181	negative regulation of blood vessel morphogenesis	'4/99	89/20565	0.000901931	0.0165771	0.0124947	4	Thbs1/Pf4/Lif/Adrb2
PM specific, LPS induced	GO:0035051	cardiocyte differentiation	'5/99	155/20565	0.000922698	0.0167148	0.0125984	5	Tgfb2/Egfr/Pdgfrb/Met/Efnb2
PM specific, LPS induced	GO:0043271	negative regulation of ion transport	'5/99	155/20565	0.000922698	0.0167148	0.0125984	5	Sestd1/Tgfb2/Thbs1/Ptgs2/Agrn
PM specific, LPS induced	GO:0031281	positive regulation of cyclase activity	'3/99	40/20565	0.000939513	0.016778	0.0126461	3	Adora2b/Calcr/Adrb2
PM specific, LPS induced	GO:0051349	positive regulation of lyase activity	'3/99	40/20565	0.000939513	0.016778	0.0126461	3	Adora2b/Calcr/Adrb2
PM specific, LPS induced	GO:1904018	positive regulation of vasculature development	'5/99	157/20565	0.000977204	0.0173033	0.013042	5	Cyp1b1/Thbs1/Ptgs2/F3/Efnb2
PM specific, LPS induced	GO:0003149	membranous septum morphogenesis	'2/99	10/20565	0.00100672	0.0173033	0.013042	2	Fzd1/Tgfb2
PM specific, LPS induced	GO:1905097	regulation of guanyl-nucleotide exchange factor activity	'2/99	10/20565	0.00100672	0.0173033	0.013042	2	Met/Epha4
PM specific, LPS induced	GO:0010631	epithelial cell migration	'6/99	237/20565	0.00100928	0.0173033	0.013042	6	Cyp1b1/Tgfb2/Thbs1/Ptgs2/Met/Efnb2
PM specific, LPS induced	GO:0003333	amino acid transmembrane transport	'3/99	41/20565	0.00101016	0.0173033	0.013042	3	Slc1a2/Slc7a2/Slc7a11
PM specific, LPS induced	GO:0007431	salivary gland development	'3/99	41/20565	0.00101016	0.0173033	0.013042	3	Egfr/Tgm2/Met
PM specific, LPS induced	GO:0043542	endothelial cell migration	'5/99	159/20565	0.00103407	0.0174147	0.013126	5	Cyp1b1/Thbs1/Ptgs2/Met/Efnb2
PM specific, LPS induced	GO:0034599	cellular response to oxidative stress	'6/99	239/20565	0.00105392	0.0174147	0.013126	6	Cyp1b1/Fzd1/Thbs1/Egfr/Met/Lrrk2
PM specific, LPS induced	GO:0090132	epithelium migration	'6/99	239/20565	0.00105392	0.0174147	0.013126	6	Cyp1b1/Tgfb2/Thbs1/Ptgs2/Met/Efnb2
PM specific, LPS induced	GO:0034763	negative regulation of transmembrane transport	'4/99	93/20565	0.00106285	0.0174147	0.013126	4	Sestd1/Tgfb2/Thbs1/Agrn
PM specific, LPS induced	GO:0035249	synaptic transmission, glutamatergic	'4/99	93/20565	0.00106285	0.0174147	0.013126	4	Ptgs2/Egfr/Lrrk2/Adrb2
PM specific, LPS induced	GO:0060840	artery development	'4/99	93/20565	0.00106285	0.0174147	0.013126	4	Tgfb2/Ltbp1/Pdgfrb/Efnb2
PM specific, LPS induced	GO:0050878	regulation of body fluid levels	'7/99	329/20565	0.00106508	0.0174147	0.013126	7	F5/Thbs1/F3/Pf4/Slc7a11/Met/Adrb2
PM specific, LPS induced	GO:0090130	tissue migration	'6/99	241/20565	0.00110006	0.0178706	0.0134696	6	Cyp1b1/Tgfb2/Thbs1/Ptgs2/Met/Efnb2
PM specific, LPS induced	GO:2001236	regulation of extrinsic apoptotic signaling pathway	'5/99	162/20565	0.00112393	0.0180615	0.0136135	5	Tgfb2/Thbs1/Pf4/Csf2/Il19
PM specific, LPS induced	GO:0019933	cAMP-mediated signaling	'4/99	95/20565	0.00115042	0.0180615	0.0136135	4	Adora2b/Pf4/Calcr/Adrb2
PM specific, LPS induced	GO:0030801	positive regulation of cyclic nucleotide metabolic process	'4/99	95/20565	0.00115042	0.0180615	0.0136135	4	Adora2b/Pf4/Calcr/Adrb2
PM specific, LPS induced	GO:0032091	negative regulation of protein binding	'4/99	95/20565	0.00115042	0.0180615	0.0136135	4	Met/Slpi/Lrrk2/Adrb2
PM specific, LPS induced	GO:0043491	protein kinase B signaling	'5/99	163/20565	0.00115514	0.0180615	0.0136135	5	Thbs1/Egfr/F3/Calcr/Csf3
PM specific, LPS induced	GO:1902622	regulation of neutrophil migration	'3/99	43/20565	0.00116134	0.0180615	0.0136135	3	Cxcl5/Cxcl1/Pf4
PM specific, LPS induced	GO:1901343	negative regulation of vasculature development	'4/99	96/20565	0.00119605	0.0180615	0.0136135	4	Thbs1/Pf4/Lif/Adrb2
PM specific, LPS induced	GO:0019221	cytokine-mediated signaling pathway	'7/99	336/20565	0.00120269	0.0180615	0.0136135	7	Cxcl5/Cxcl1/F3/Pf4/Flrt3/Cish/Il1f6
PM specific, LPS induced	GO:0010744	positive regulation of macrophage derived foam cell differentiation	'2/99	11/20565	0.00122657	0.0180615	0.0136135	2	Pf4/Csf2
PM specific, LPS induced	GO:0044745	amino acid transmembrane import	'2/99	11/20565	0.00122657	0.0180615	0.0136135	2	Slc1a2/Slc7a2
PM specific, LPS induced	GO:0070942	neutrophil mediated cytotoxicity	'2/99	11/20565	0.00122657	0.0180615	0.0136135	2	Cxcl5/Cxcl1
PM specific, LPS induced	GO:0070943	neutrophil mediated killing of symbiont cell	'2/99	11/20565	0.00122657	0.0180615	0.0136135	2	Cxcl5/Cxcl1
PM specific, LPS induced	GO:0072176	nephric duct development	'2/99	11/20565	0.00122657	0.0180615	0.0136135	2	Efnb2/Epha4
PM specific, LPS induced	GO:0072178	nephric duct morphogenesis	'2/99	11/20565	0.00122657	0.0180615	0.0136135	2	Efnb2/Epha4
PM specific, LPS induced	GO:0089718	amino acid import across plasma membrane	'2/99	11/20565	0.00122657	0.0180615	0.0136135	2	Slc1a2/Slc7a2
PM specific, LPS induced	GO:1903025	regulation of RNA polymerase II regulatory region sequence-specific DNA binding	'2/99	11/20565	0.00122657	0.0180615	0.0136135	2	Zbtb7c/Lif
PM specific, LPS induced	GO:0010712	regulation of collagen metabolic process	'3/99	44/20565	0.00124199	0.0180908	0.0136356	3	Ltbp1/Adora2b/Pdgfrb
PM specific, LPS induced	GO:0001909	leukocyte mediated cytotoxicity	'4/99	97/20565	0.00124294	0.0180908	0.0136356	4	Cxcl5/Cxcl1/H2-Q7/Slamf6
PM specific, LPS induced	GO:1901214	regulation of neuron death	'7/99	340/20565	0.00128737	0.018577	0.014002	7	Fzd1/Tgfb2/Agrn/Efnb2/Ddit4/Lrrk2/Csf3
PM specific, LPS induced	GO:0014812	muscle cell migration	'4/99	98/20565	0.00129109	0.018577	0.014002	4	Cyp1b1/F3/Pdgfrb/Met
PM specific, LPS induced	GO:0044246	regulation of multicellular organismal metabolic process	'3/99	45/20565	0.00132608	0.0188345	0.0141962	3	Ltbp1/Adora2b/Pdgfrb
PM specific, LPS induced	GO:0051924	regulation of calcium ion transport	'6/99	250/20565	0.00132718	0.0188345	0.0141962	6	Sestd1/Tgfb2/Ptgs2/Pdgfrb/Calcr/Adrb2
PM specific, LPS induced	GO:0001667	ameboidal-type cell migration	'7/99	342/20565	0.00133143	0.0188345	0.0141962	7	Cyp1b1/Has1/Tgfb2/Thbs1/Ptgs2/Met/Efnb2
PM specific, LPS induced	GO:0070838	divalent metal ion transport	'8/99	444/20565	0.00136766	0.0192389	0.014501	8	Anxa6/Sestd1/Tgfb2/Slc41a2/Ptgs2/Pdgfrb/Calcr/Adrb2
PM specific, LPS induced	GO:0007162	negative regulation of cell adhesion	'6/99	252/20565	0.00138219	0.0193353	0.0145736	6	Cyp1b1/Thbs1/H2-Ab1/Plet1/Ass1/Adrb2
PM specific, LPS induced	GO:0032092	positive regulation of protein binding	'4/99	100/20565	0.00139129	0.0193551	0.0145885	4	Agrn/Epha4/Lrrk2/Csf3
PM specific, LPS induced	GO:0045429	positive regulation of nitric oxide biosynthetic process	'3/99	46/20565	0.00141367	0.0194515	0.0146612	3	Ptgs2/Egfr/Ass1
PM specific, LPS induced	GO:1904407	positive regulation of nitric oxide metabolic process	'3/99	46/20565	0.00141367	0.0194515	0.0146612	3	Ptgs2/Egfr/Ass1
PM specific, LPS induced	GO:0072511	divalent inorganic cation transport	'8/99	447/20565	0.00142711	0.0195297	0.0147201	8	Anxa6/Sestd1/Tgfb2/Slc41a2/Ptgs2/Pdgfrb/Calcr/Adrb2
PM specific, LPS induced	GO:0042307	positive regulation of protein import into nucleus	'4/99	101/20565	0.00144337	0.0195941	0.0147687	4	Ptgs2/Egfr/Lrrk2/Csf3
PM specific, LPS induced	GO:0008015	blood circulation	'8/99	448/20565	0.00144738	0.0195941	0.0147687	8	Tgfb2/F5/Ptgs2/Egfr/Adora2b/Agrn/Met/Adrb2
PM specific, LPS induced	GO:0001973	adenosine receptor signaling pathway	'2/99	12/20565	0.00146728	0.0196521	0.0148124	2	Adora2b/Acpp
PM specific, LPS induced	GO:0038093	Fc receptor signaling pathway	'2/99	12/20565	0.00146728	0.0196521	0.0148124	2	Clec4d/Clec4e
PM specific, LPS induced	GO:0001912	positive regulation of leukocyte mediated cytotoxicity	'3/99	47/20565	0.00150482	0.0199428	0.0150315	3	Cxcl1/H2-Q7/Slamf6
PM specific, LPS induced	GO:0032964	collagen biosynthetic process	'3/99	47/20565	0.00150482	0.0199428	0.0150315	3	Ltbp1/Adora2b/Pdgfrb
PM specific, LPS induced	GO:0003013	circulatory system process	'8/99	452/20565	0.00153076	0.0201208	0.0151657	8	Tgfb2/F5/Ptgs2/Egfr/Adora2b/Agrn/Met/Adrb2
PM specific, LPS induced	GO:0042306	regulation of protein import into nucleus	'5/99	174/20565	0.00154222	0.0201208	0.0151657	5	Fzd1/Ptgs2/Egfr/Lrrk2/Csf3
PM specific, LPS induced	GO:0048771	tissue remodeling	'5/99	174/20565	0.00154222	0.0201208	0.0151657	5	Tgfb2/Egfr/Tgm2/Lif/Adrb2
PM specific, LPS induced	GO:1903202	negative regulation of oxidative stress-induced cell death	'3/99	48/20565	0.00159957	0.0206548	0.0155681	3	Fzd1/Met/Lrrk2
PM specific, LPS induced	GO:2001239	regulation of extrinsic apoptotic signaling pathway in absence of ligand	'3/99	48/20565	0.00159957	0.0206548	0.0155681	3	Tgfb2/Pf4/Csf2
PM specific, LPS induced	GO:1904591	positive regulation of protein import	'4/99	104/20565	0.00160776	0.0206548	0.0155681	4	Ptgs2/Egfr/Lrrk2/Csf3
PM specific, LPS induced	GO:1904589	regulation of protein import	'5/99	177/20565	0.00166261	0.021251	0.0160175	5	Fzd1/Ptgs2/Egfr/Lrrk2/Csf3
PM specific, LPS induced	GO:1900408	negative regulation of cellular response to oxidative stress	'3/99	49/20565	0.00169798	0.0215935	0.0162757	3	Fzd1/Met/Lrrk2
PM specific, LPS induced	GO:0042268	regulation of cytolysis	'2/99	13/20565	0.00172862	0.021655	0.0163221	2	Pf4/Csf2
PM specific, LPS induced	GO:0045651	positive regulation of macrophage differentiation	'2/99	13/20565	0.00172862	0.021655	0.0163221	2	Pf4/Lif
PM specific, LPS induced	GO:0072216	positive regulation of metanephros development	'2/99	13/20565	0.00172862	0.021655	0.0163221	2	Pdgfrb/Lif
PM specific, LPS induced	GO:0001822	kidney development	'6/99	264/20565	0.00174977	0.0218115	0.01644	6	Tgfb2/Pdgfrb/Lif/Efnb2/Epha4/Lrrk2
PM specific, LPS induced	GO:0050729	positive regulation of inflammatory response	'4/99	107/20565	0.00178474	0.0221378	0.016686	4	Ptgs2/Egfr/Adora2b/Tgm2
PM specific, LPS induced	GO:0097529	myeloid leukocyte migration	'5/99	181/20565	0.00183369	0.0224628	0.0169309	5	Cxcl5/Cxcl1/Thbs1/Cd177/Pf4
PM specific, LPS induced	GO:0035821	modification of morphology or physiology of other organism	'4/99	108/20565	0.00184662	0.0224628	0.0169309	4	Cxcl5/Cxcl1/Pf4/Slpi
PM specific, LPS induced	GO:0044236	multicellular organism metabolic process	'4/99	108/20565	0.00184662	0.0224628	0.0169309	4	Ltbp1/Adora2b/Pdgfrb/Adrb2
PM specific, LPS induced	GO:1990266	neutrophil migration	'4/99	108/20565	0.00184662	0.0224628	0.0169309	4	Cxcl5/Cxcl1/Cd177/Pf4
PM specific, LPS induced	GO:0019932	second-messenger-mediated signaling	'6/99	268/20565	0.00188746	0.0226854	0.0170987	6	Thbs1/Adora2b/Pf4/Calcr/Lrrk2/Adrb2
PM specific, LPS induced	GO:0001974	blood vessel remodeling	'3/99	51/20565	0.00190596	0.0226854	0.0170987	3	Tgfb2/Tgm2/Lif
PM specific, LPS induced	GO:0015807	L-amino acid transport	'3/99	51/20565	0.00190596	0.0226854	0.0170987	3	Slc1a2/Slc7a2/Slc7a11
PM specific, LPS induced	GO:1905207	regulation of cardiocyte differentiation	'3/99	51/20565	0.00190596	0.0226854	0.0170987	3	Tgfb2/Egfr/Efnb2
PM specific, LPS induced	GO:0008277	regulation of G-protein coupled receptor protein signaling pathway	'4/99	109/20565	0.00190997	0.0226854	0.0170987	4	Met/Acpp/Lrrk2/Adrb2
PM specific, LPS induced	GO:0002526	acute inflammatory response	'4/99	110/20565	0.00197482	0.0231283	0.0174325	4	Cxcl1/Ptgs2/F3/Saa3
PM specific, LPS induced	GO:0002688	regulation of leukocyte chemotaxis	'4/99	110/20565	0.00197482	0.0231283	0.0174325	4	Cxcl5/Cxcl1/Thbs1/Pf4
PM specific, LPS induced	GO:1901216	positive regulation of neuron death	'4/99	110/20565	0.00197482	0.0231283	0.0174325	4	Tgfb2/Agrn/Efnb2/Ddit4
PM specific, LPS induced	GO:0010801	negative regulation of peptidyl-threonine phosphorylation	'2/99	14/20565	0.00201041	0.0233201	0.0175771	2	Met/Ddit4
PM specific, LPS induced	GO:1902883	negative regulation of response to oxidative stress	'3/99	52/20565	0.00201564	0.0233201	0.0175771	3	Fzd1/Met/Lrrk2
PM specific, LPS induced	GO:0052547	regulation of peptidase activity	'7/99	368/20565	0.00201897	0.0233201	0.0175771	7	Thbs1/Ptgs2/F3/Serpinb1a/Epha4/Serpinb1b/Slpi
PM specific, LPS induced	GO:0000302	response to reactive oxygen species	'5/99	187/20565	0.00211404	0.0243067	0.0183207	5	Cyp1b1/Thbs1/Egfr/Met/Lrrk2
PM specific, LPS induced	GO:0007566	embryo implantation	'3/99	53/20565	0.00212917	0.0243693	0.0183679	3	H2-Q7/Ptgs2/Lif
PM specific, LPS induced	GO:0071621	granulocyte chemotaxis	'4/99	113/20565	0.00217846	0.0248207	0.0187081	4	Cxcl5/Cxcl1/Thbs1/Pf4
PM specific, LPS induced	GO:0030099	myeloid cell differentiation	'7/99	374/20565	0.00221099	0.0250778	0.0189019	7	Rabgap1l/Pilrb1/Pf4/Calcr/Lif/Csf3/Csf2
PM specific, LPS induced	GO:0006606	protein import into nucleus	'6/99	277/20565	0.00222721	0.0251485	0.0189552	6	Fzd1/Tgfb2/Ptgs2/Egfr/Lrrk2/Csf3
PM specific, LPS induced	GO:0098739	import across plasma membrane	'3/99	54/20565	0.0022466	0.0251738	0.0189743	3	Slc1a2/Slc7a2/Calcr
PM specific, LPS induced	GO:0006275	regulation of DNA replication	'4/99	114/20565	0.00224945	0.0251738	0.0189743	4	Areg/Egfr/Met/Csf2
PM specific, LPS induced	GO:0006979	response to oxidative stress	'7/99	376/20565	0.00227804	0.0253109	0.0190776	7	Cyp1b1/Fzd1/Thbs1/Ptgs2/Egfr/Met/Lrrk2
PM specific, LPS induced	GO:0050727	regulation of inflammatory response	'6/99	279/20565	0.00230861	0.0253109	0.0190776	6	Ptgs2/Egfr/Adora2b/Slc7a2/Tgm2/Adrb2
PM specific, LPS induced	GO:0035588	G-protein coupled purinergic receptor signaling pathway	'2/99	15/20565	0.00231244	0.0253109	0.0190776	2	Adora2b/Acpp
PM specific, LPS induced	GO:0051709	regulation of killing of cells of other organism	'2/99	15/20565	0.00231244	0.0253109	0.0190776	2	Cxcl5/Cxcl1
PM specific, LPS induced	GO:0071636	positive regulation of transforming growth factor beta production	'2/99	15/20565	0.00231244	0.0253109	0.0190776	2	Thbs1/Ptgs2
PM specific, LPS induced	GO:0010634	positive regulation of epithelial cell migration	'4/99	115/20565	0.00232201	0.0253109	0.0190776	4	Tgfb2/Thbs1/Ptgs2/Met
PM specific, LPS induced	GO:0043405	regulation of MAP kinase activity	'6/99	280/20565	0.00235014	0.0254811	0.0192059	6	Thbs1/Egfr/Pdgfrb/Met/Epha4/Lrrk2
PM specific, LPS induced	GO:0035272	exocrine system development	'3/99	55/20565	0.00236798	0.0254811	0.0192059	3	Egfr/Tgm2/Met
PM specific, LPS induced	GO:0070098	chemokine-mediated signaling pathway	'3/99	55/20565	0.00236798	0.0254811	0.0192059	3	Cxcl5/Cxcl1/Pf4
PM specific, LPS induced	GO:0051170	nuclear import	'6/99	281/20565	0.00239223	0.0256325	0.01932	6	Fzd1/Tgfb2/Ptgs2/Egfr/Lrrk2/Csf3
PM specific, LPS induced	GO:0034504	protein localization to nucleus	'7/99	380/20565	0.00241686	0.025759	0.0194154	7	Fzd1/Tgfb2/Ptgs2/Egfr/Lif/Lrrk2/Csf3
PM specific, LPS induced	GO:0009187	cyclic nucleotide metabolic process	'5/99	193/20565	0.0024245	0.025759	0.0194154	5	Thbs1/Adora2b/Pf4/Calcr/Adrb2
PM specific, LPS induced	GO:0006936	muscle contraction	'6/99	282/20565	0.00243488	0.0257607	0.0194166	6	Anxa6/Ptgs2/Adora2b/Agrn/Met/Adrb2
PM specific, LPS induced	GO:0014065	phosphatidylinositol 3-kinase signaling	'4/99	117/20565	0.00247195	0.0259348	0.0195479	4	Tgfb2/Egfr/Pdgfrb/Csf3
PM specific, LPS induced	GO:0071248	cellular response to metal ion	'4/99	117/20565	0.00247195	0.0259348	0.0195479	4	Adgrv1/Egfr/Hvcn1/Lrrk2
PM specific, LPS induced	GO:0014911	positive regulation of smooth muscle cell migration	'3/99	56/20565	0.00249335	0.0260508	0.0196353	3	Cyp1b1/F3/Pdgfrb
PM specific, LPS induced	GO:0002699	positive regulation of immune effector process	'5/99	195/20565	0.00253499	0.0263764	0.0198807	5	Cxcl1/H2-Q7/Cd177/Slamf6/Adora2b
PM specific, LPS induced	GO:0072001	renal system development	'6/99	285/20565	0.0025663	0.0265348	0.0200001	6	Tgfb2/Pdgfrb/Lif/Efnb2/Epha4/Lrrk2
PM specific, LPS induced	GO:0050673	epithelial cell proliferation	'7/99	385/20565	0.00259946	0.0265348	0.0200001	7	Fabp7/Tgfb2/Areg/Thbs1/Egfr/F3/Efnb2
PM specific, LPS induced	GO:0019730	antimicrobial humoral response	'3/99	57/20565	0.00262275	0.0265348	0.0200001	3	Cxcl5/Pf4/Slpi
PM specific, LPS induced	GO:1903428	positive regulation of reactive oxygen species biosynthetic process	'3/99	57/20565	0.00262275	0.0265348	0.0200001	3	Ptgs2/Egfr/Ass1
PM specific, LPS induced	GO:0046824	positive regulation of nucleocytoplasmic transport	'4/99	119/20565	0.00262841	0.0265348	0.0200001	4	Ptgs2/Egfr/Lrrk2/Csf3
PM specific, LPS induced	GO:0015813	L-glutamate transport	'2/99	16/20565	0.00263451	0.0265348	0.0200001	2	Slc1a2/Slc7a11
PM specific, LPS induced	GO:0046697	decidualization	'2/99	16/20565	0.00263451	0.0265348	0.0200001	2	Ptgs2/Lif
PM specific, LPS induced	GO:0071498	cellular response to fluid shear stress	'2/99	16/20565	0.00263451	0.0265348	0.0200001	2	Ptgs2/Ass1
PM specific, LPS induced	GO:2001233	regulation of apoptotic signaling pathway	'7/99	391/20565	0.00283243	0.0284146	0.0214169	7	Tgfb2/Thbs1/Ptgs2/Pf4/Lrrk2/Csf2/Il19
PM specific, LPS induced	GO:0031343	positive regulation of cell killing	'3/99	59/20565	0.00289383	0.0289153	0.0217944	3	Cxcl1/H2-Q7/Slamf6
PM specific, LPS induced	GO:0006816	calcium ion transport	'7/99	394/20565	0.00295477	0.0292918	0.0220781	7	Anxa6/Sestd1/Tgfb2/Ptgs2/Pdgfrb/Calcr/Adrb2
PM specific, LPS induced	GO:0051052	regulation of DNA metabolic process	'7/99	394/20565	0.00295477	0.0292918	0.0220781	7	Cyp1b1/Areg/Egfr/Pdgfrb/Met/Dnmt3l/Csf2
PM specific, LPS induced	GO:0060973	cell migration involved in heart development	'2/99	17/20565	0.00297644	0.0293909	0.0221528	2	Pdgfrb/Flrt3
PM specific, LPS induced	GO:0031349	positive regulation of defense response	'6/99	296/20565	0.00309423	0.0304347	0.0229396	6	Cxcl1/Slamf6/Ptgs2/Egfr/Adora2b/Tgm2
PM specific, LPS induced	GO:0014706	striated muscle tissue development	'7/99	399/20565	0.00316764	0.030931	0.0233137	7	Tgfb2/Boc/Pdgfrb/Ly6e/Met/Efnb2/Adrb2
PM specific, LPS induced	GO:0002292	T cell differentiation involved in immune response	'3/99	61/20565	0.00318155	0.030931	0.0233137	3	Clec4d/Slamf6/Clec4e
PM specific, LPS induced	GO:0051926	negative regulation of calcium ion transport	'3/99	61/20565	0.00318155	0.030931	0.0233137	3	Sestd1/Tgfb2/Ptgs2
PM specific, LPS induced	GO:0050867	positive regulation of cell activation	'6/99	298/20565	0.00319834	0.0309747	0.0233466	6	Thbs1/H2-Ab1/Cd177/Adora2b/Pdgfrb/Efnb2
PM specific, LPS induced	GO:0045981	positive regulation of nucleotide metabolic process	'4/99	127/20565	0.00332238	0.0315982	0.0238166	4	Adora2b/Pf4/Calcr/Adrb2
PM specific, LPS induced	GO:1900544	positive regulation of purine nucleotide metabolic process	'4/99	127/20565	0.00332238	0.0315982	0.0238166	4	Adora2b/Pf4/Calcr/Adrb2
PM specific, LPS induced	GO:0007189	adenylate cyclase-activating G-protein coupled receptor signaling pathway	'3/99	62/20565	0.00333175	0.0315982	0.0238166	3	Adora2b/Calcr/Adrb2
PM specific, LPS induced	GO:0045428	regulation of nitric oxide biosynthetic process	'3/99	62/20565	0.00333175	0.0315982	0.0238166	3	Ptgs2/Egfr/Ass1
PM specific, LPS induced	GO:0002577	regulation of antigen processing and presentation	'2/99	18/20565	0.00333802	0.0315982	0.0238166	2	Thbs1/H2-Ab1
PM specific, LPS induced	GO:0035587	purinergic receptor signaling pathway	'2/99	18/20565	0.00333802	0.0315982	0.0238166	2	Adora2b/Acpp
PM specific, LPS induced	GO:0001933	negative regulation of protein phosphorylation	'7/99	405/20565	0.00343839	0.0324264	0.0244408	7	Adarb1/Met/Lif/Flrt3/Ddit4/Lrrk2/Cish
PM specific, LPS induced	GO:0030814	regulation of cAMP metabolic process	'4/99	129/20565	0.00351358	0.0330119	0.0248821	4	Adora2b/Pf4/Calcr/Adrb2
PM specific, LPS induced	GO:0071900	regulation of protein serine/threonine kinase activity	'7/99	407/20565	0.00353246	0.0330659	0.0249228	7	Thbs1/Egfr/Pdgfrb/Met/Epha4/Lrrk2/Adrb2
PM specific, LPS induced	GO:0014068	positive regulation of phosphatidylinositol 3-kinase signaling	'3/99	64/20565	0.00364504	0.0339934	0.0256218	3	Tgfb2/Pdgfrb/Csf3
PM specific, LPS induced	GO:0002504	antigen processing and presentation of peptide or polysaccharide antigen via MHC class II	'2/99	19/20565	0.00371906	0.0341774	0.0257605	2	Thbs1/H2-Ab1
PM specific, LPS induced	GO:0015800	acidic amino acid transport	'2/99	19/20565	0.00371906	0.0341774	0.0257605	2	Slc1a2/Slc7a11
PM specific, LPS induced	GO:0043092	L-amino acid import	'2/99	19/20565	0.00371906	0.0341774	0.0257605	2	Slc1a2/Slc7a2
PM specific, LPS induced	GO:0045649	regulation of macrophage differentiation	'2/99	19/20565	0.00371906	0.0341774	0.0257605	2	Pf4/Lif
PM specific, LPS induced	GO:0042116	macrophage activation	'3/99	65/20565	0.0038082	0.0348692	0.026282	3	Thbs1/Slc7a2/Csf2
PM specific, LPS induced	GO:2001234	negative regulation of apoptotic signaling pathway	'5/99	215/20565	0.00385001	0.0351244	0.0264743	5	Ptgs2/Pf4/Lrrk2/Csf2/Il19
PM specific, LPS induced	GO:0002687	positive regulation of leukocyte migration	'4/99	133/20565	0.00391818	0.0354368	0.0267098	4	Cxcl5/Cxcl1/Thbs1/Pf4
PM specific, LPS induced	GO:0032635	interleukin-6 production	'4/99	133/20565	0.00391818	0.0354368	0.0267098	4	Adora2b/Met/Il1f6/Il19
PM specific, LPS induced	GO:0046822	regulation of nucleocytoplasmic transport	'5/99	216/20565	0.00392648	0.0354368	0.0267098	5	Fzd1/Ptgs2/Egfr/Lrrk2/Csf3
PM specific, LPS induced	GO:0048844	artery morphogenesis	'3/99	66/20565	0.00397574	0.0357533	0.0269484	3	Tgfb2/Pdgfrb/Efnb2
PM specific, LPS induced	GO:0090257	regulation of muscle system process	'5/99	218/20565	0.00408267	0.0363901	0.0274283	5	Anxa6/Ptgs2/Adora2b/Agrn/Adrb2
PM specific, LPS induced	GO:0060537	muscle tissue development	'7/99	418/20565	0.00408546	0.0363901	0.0274283	7	Tgfb2/Boc/Pdgfrb/Ly6e/Met/Efnb2/Adrb2
PM specific, LPS induced	GO:0042537	benzene-containing compound metabolic process	'2/99	20/20565	0.00411937	0.0363901	0.0274283	2	Cyp1b1/Ido2
PM specific, LPS induced	GO:0061298	retina vasculature development in camera-type eye	'2/99	20/20565	0.00411937	0.0363901	0.0274283	2	Cyp1b1/Pdgfrb
PM specific, LPS induced	GO:2001026	regulation of endothelial cell chemotaxis	'2/99	20/20565	0.00411937	0.0363901	0.0274283	2	Thbs1/Met
PM specific, LPS induced	GO:0006940	regulation of smooth muscle contraction	'3/99	67/20565	0.00414772	0.0363901	0.0274283	3	Ptgs2/Adora2b/Adrb2
PM specific, LPS induced	GO:0051851	modification by host of symbiont morphology or physiology	'3/99	67/20565	0.00414772	0.0363901	0.0274283	3	Cxcl5/Cxcl1/Pf4
PM specific, LPS induced	GO:0034765	regulation of ion transmembrane transport	'7/99	420/20565	0.0041927	0.036657	0.0276295	7	Sestd1/Tgfb2/Thbs1/Agrn/Calcr/Hvcn1/Adrb2
PM specific, LPS induced	GO:0010466	negative regulation of peptidase activity	'5/99	220/20565	0.00424325	0.0368767	0.0277951	5	Thbs1/Ptgs2/Serpinb1a/Serpinb1b/Slpi
PM specific, LPS induced	GO:0007409	axonogenesis	'7/99	421/20565	0.00424711	0.0368767	0.0277951	7	Tgfb2/Boc/Agrn/Adarb1/Flrt3/Efnb2/Epha4
PM specific, LPS induced	GO:0031279	regulation of cyclase activity	'3/99	68/20565	0.00432415	0.0374166	0.028202	3	Adora2b/Calcr/Adrb2
PM specific, LPS induced	GO:0003231	cardiac ventricle development	'4/99	137/20565	0.00435324	0.0375393	0.0282945	4	Fzd1/Tgfb2/Ltbp1/Ly6e
PM specific, LPS induced	GO:1903522	regulation of blood circulation	'5/99	223/20565	0.00449253	0.0384802	0.0290037	5	Tgfb2/Ptgs2/Egfr/Agrn/Adrb2
PM specific, LPS induced	GO:0051966	regulation of synaptic transmission, glutamatergic	'3/99	69/20565	0.00450509	0.0384802	0.0290037	3	Ptgs2/Egfr/Lrrk2
PM specific, LPS induced	GO:0010743	regulation of macrophage derived foam cell differentiation	'2/99	21/20565	0.00453877	0.0384802	0.0290037	2	Pf4/Csf2
PM specific, LPS induced	GO:0043090	amino acid import	'2/99	21/20565	0.00453877	0.0384802	0.0290037	2	Slc1a2/Slc7a2
PM specific, LPS induced	GO:0090280	positive regulation of calcium ion import	'2/99	21/20565	0.00453877	0.0384802	0.0290037	2	Pdgfrb/Calcr
PM specific, LPS induced	GO:0048015	phosphatidylinositol-mediated signaling	'4/99	139/20565	0.00458253	0.0387208	0.0291851	4	Tgfb2/Egfr/Pdgfrb/Csf3
PM specific, LPS induced	GO:0051339	regulation of lyase activity	'3/99	70/20565	0.00469054	0.039319	0.029636	3	Adora2b/Calcr/Adrb2
PM specific, LPS induced	GO:0045766	positive regulation of angiogenesis	'4/99	140/20565	0.00470017	0.039319	0.029636	4	Cyp1b1/Thbs1/Ptgs2/F3
PM specific, LPS induced	GO:0098656	anion transmembrane transport	'4/99	140/20565	0.00470017	0.039319	0.029636	4	Thbs1/Slc1a2/Slc7a2/Slc7a11
PM specific, LPS induced	GO:1903201	regulation of oxidative stress-induced cell death	'3/99	71/20565	0.00488056	0.040689	0.0306686	3	Fzd1/Met/Lrrk2
PM specific, LPS induced	GO:0048017	inositol lipid-mediated signaling	'4/99	142/20565	0.00494151	0.040689	0.0306686	4	Tgfb2/Egfr/Pdgfrb/Csf3
PM specific, LPS induced	GO:0030325	adrenal gland development	'2/99	22/20565	0.00497705	0.040689	0.0306686	2	Pdgfrb/Ly6e
PM specific, LPS induced	GO:0031649	heat generation	'2/99	22/20565	0.00497705	0.040689	0.0306686	2	Ptgs2/Adrb2
PM specific, LPS induced	GO:0034405	response to fluid shear stress	'2/99	22/20565	0.00497705	0.040689	0.0306686	2	Ptgs2/Ass1
PM specific, LPS induced	GO:0044851	hair cycle phase	'2/99	22/20565	0.00497705	0.040689	0.0306686	2	Tgfb2/Ptgs2
PM specific, LPS induced	GO:0072215	regulation of metanephros development	'2/99	22/20565	0.00497705	0.040689	0.0306686	2	Pdgfrb/Lif
PM specific, LPS induced	GO:0001655	urogenital system development	'6/99	327/20565	0.00502007	0.0406984	0.0306756	6	Tgfb2/Pdgfrb/Lif/Efnb2/Epha4/Lrrk2
PM specific, LPS induced	GO:0097191	extrinsic apoptotic signaling pathway	'5/99	229/20565	0.00502215	0.0406984	0.0306756	5	Tgfb2/Thbs1/Pf4/Csf2/Il19
PM specific, LPS induced	GO:0045834	positive regulation of lipid metabolic process	'4/99	143/20565	0.00506524	0.0406984	0.0306756	4	Dgat2/Ptgs2/Adora2b/Pdgfrb
PM specific, LPS induced	GO:0050807	regulation of synapse organization	'4/99	143/20565	0.00506524	0.0406984	0.0306756	4	Tpbg/Agrn/Flrt3/Epha4
PM specific, LPS induced	GO:0010595	positive regulation of endothelial cell migration	'3/99	72/20565	0.00507518	0.0406984	0.0306756	3	Thbs1/Ptgs2/Met
PM specific, LPS induced	GO:0051702	interaction with symbiont	'3/99	72/20565	0.00507518	0.0406984	0.0306756	3	Cxcl5/Cxcl1/Pf4
PM specific, LPS induced	GO:0034762	regulation of transmembrane transport	'7/99	436/20565	0.00512935	0.0408725	0.0308068	7	Sestd1/Tgfb2/Thbs1/Agrn/Calcr/Hvcn1/Adrb2
PM specific, LPS induced	GO:0048608	reproductive structure development	'7/99	436/20565	0.00512935	0.0408725	0.0308068	7	Tgfb2/Ptgs2/Egfr/Met/Dnmt3l/Lif/Csf2
PM specific, LPS induced	GO:0017038	protein import	'6/99	329/20565	0.00516895	0.0410581	0.0309468	6	Fzd1/Tgfb2/Ptgs2/Egfr/Lrrk2/Csf3
PM specific, LPS induced	GO:0032147	activation of protein kinase activity	'5/99	231/20565	0.00520814	0.0412393	0.0310833	5	Tgfb2/Thbs1/Egfr/Met/Lrrk2
PM specific, LPS induced	GO:0030819	positive regulation of cAMP biosynthetic process	'3/99	73/20565	0.00527441	0.0415933	0.0313501	3	Adora2b/Calcr/Adrb2
PM specific, LPS induced	GO:0002449	lymphocyte mediated immunity	'5/99	232/20565	0.00530294	0.0415933	0.0313501	5	Crlf2/H2-Q7/H2-Ab1/Slamf6/C1rl
PM specific, LPS induced	GO:0048738	cardiac muscle tissue development	'5/99	232/20565	0.00530294	0.0415933	0.0313501	5	Tgfb2/Pdgfrb/Ly6e/Met/Efnb2
PM specific, LPS induced	GO:0060041	retina development in camera-type eye	'4/99	145/20565	0.00531892	0.0415933	0.0313501	4	Cyp1b1/Tgfb2/Pdgfrb/Lif
PM specific, LPS induced	GO:0061458	reproductive system development	'7/99	440/20565	0.00538638	0.0419904	0.0316495	7	Tgfb2/Ptgs2/Egfr/Met/Dnmt3l/Lif/Csf2
PM specific, LPS induced	GO:1904646	cellular response to amyloid-beta	'2/99	23/20565	0.00543404	0.0421846	0.0317958	2	Epha4/Adrb2
PM specific, LPS induced	GO:0048871	multicellular organismal homeostasis	'6/99	333/20565	0.00547643	0.0421846	0.0317958	6	Adgrv1/Ptgs2/Egfr/Pdgfrb/Met/Adrb2
PM specific, LPS induced	GO:0097755	positive regulation of blood vessel diameter	'3/99	74/20565	0.0054783	0.0421846	0.0317958	3	Egfr/Adora2b/Adrb2
PM specific, LPS induced	GO:1904063	negative regulation of cation transmembrane transport	'3/99	74/20565	0.0054783	0.0421846	0.0317958	3	Sestd1/Tgfb2/Agrn
PM specific, LPS induced	GO:0022612	gland morphogenesis	'4/99	147/20565	0.00558097	0.0428441	0.032293	4	Areg/Egfr/Tgm2/Met
PM specific, LPS induced	GO:0051965	positive regulation of synapse assembly	'3/99	75/20565	0.00568687	0.0433925	0.0327063	3	Tpbg/Agrn/Flrt3
PM specific, LPS induced	GO:0060079	excitatory postsynaptic potential	'3/99	75/20565	0.00568687	0.0433925	0.0327063	3	Met/Lrrk2/Adrb2
PM specific, LPS induced	GO:0046058	cAMP metabolic process	'4/99	149/20565	0.00585152	0.044155	0.033281	4	Adora2b/Pf4/Calcr/Adrb2
PM specific, LPS induced	GO:0042326	negative regulation of phosphorylation	'7/99	447/20565	0.00585935	0.044155	0.033281	7	Adarb1/Met/Lif/Flrt3/Ddit4/Lrrk2/Cish
PM specific, LPS induced	GO:0003281	ventricular septum development	'3/99	76/20565	0.00590015	0.044155	0.033281	3	Fzd1/Tgfb2/Ltbp1
PM specific, LPS induced	GO:0031100	animal organ regeneration	'2/99	24/20565	0.00590954	0.044155	0.033281	2	Cxcl5/Lif
PM specific, LPS induced	GO:0051560	mitochondrial calcium ion homeostasis	'2/99	24/20565	0.00590954	0.044155	0.033281	2	Anxa6/Tgm2
PM specific, LPS induced	GO:1901032	negative regulation of response to reactive oxygen species	'2/99	24/20565	0.00590954	0.044155	0.033281	2	Met/Lrrk2
PM specific, LPS induced	GO:1903206	negative regulation of hydrogen peroxide-induced cell death	'2/99	24/20565	0.00590954	0.044155	0.033281	2	Met/Lrrk2
PM specific, LPS induced	GO:0050803	regulation of synapse structure or activity	'4/99	150/20565	0.00599001	0.0446238	0.0336344	4	Tpbg/Agrn/Flrt3/Epha4
PM specific, LPS induced	GO:0046777	protein autophosphorylation	'5/99	240/20565	0.00610589	0.0449671	0.0338931	5	Egfr/Pdgfrb/Met/Epha4/Lrrk2
PM specific, LPS induced	GO:0048708	astrocyte differentiation	'3/99	77/20565	0.00611816	0.0449671	0.0338931	3	Egfr/Lif/Epha4
PM specific, LPS induced	GO:0070301	cellular response to hydrogen peroxide	'3/99	77/20565	0.00611816	0.0449671	0.0338931	3	Cyp1b1/Met/Lrrk2
PM specific, LPS induced	GO:1903035	negative regulation of response to wounding	'3/99	77/20565	0.00611816	0.0449671	0.0338931	3	Thbs1/Epha4/Adrb2
PM specific, LPS induced	GO:0051100	negative regulation of binding	'4/99	151/20565	0.00613068	0.0449671	0.0338931	4	Met/Slpi/Lrrk2/Adrb2
PM specific, LPS induced	GO:0061564	axon development	'7/99	451/20565	0.00614325	0.0449671	0.0338931	7	Tgfb2/Boc/Agrn/Adarb1/Flrt3/Efnb2/Epha4
PM specific, LPS induced	GO:0016311	dephosphorylation	'6/99	343/20565	0.00630366	0.0459817	0.0346578	6	Tgfb2/Sh2d4a/Pdgfrb/Acpp/Mtmr7/Ptpn7
PM specific, LPS induced	GO:0010742	macrophage derived foam cell differentiation	'2/99	25/20565	0.00640337	0.0459817	0.0346578	2	Pf4/Csf2
PM specific, LPS induced	GO:0042119	neutrophil activation	'2/99	25/20565	0.00640337	0.0459817	0.0346578	2	Cxcl5/Cd177
PM specific, LPS induced	GO:0048305	immunoglobulin secretion	'2/99	25/20565	0.00640337	0.0459817	0.0346578	2	Crlf2/Traf3ip2
PM specific, LPS induced	GO:1904645	response to amyloid-beta	'2/99	25/20565	0.00640337	0.0459817	0.0346578	2	Epha4/Adrb2
PM specific, LPS induced	GO:0002460	adaptive immune response based on somatic recombination of immune receptors built from immunoglobulin superfamily domains	'5/99	243/20565	0.00642794	0.0459817	0.0346578	5	Crlf2/H2-Q7/H2-Ab1/Slamf6/C1rl
PM specific, LPS induced	GO:0032496	response to lipopolysaccharide	'5/99	243/20565	0.00642794	0.0459817	0.0346578	5	Cxcl5/Cxcl1/Ptgs2/Pf4/Slpi
PM specific, LPS induced	GO:0061448	connective tissue development	'5/99	243/20565	0.00642794	0.0459817	0.0346578	5	Dgat2/Itgb8/Tgfb2/Thbs1/Pdgfrb
PM specific, LPS induced	GO:0002040	sprouting angiogenesis	'3/99	79/20565	0.00656852	0.0463292	0.0349198	3	Thbs1/Ptgs2/Efnb2
PM specific, LPS induced	GO:0003151	outflow tract morphogenesis	'3/99	79/20565	0.00656852	0.0463292	0.0349198	3	Fzd1/Tgfb2/Thbs1
PM specific, LPS induced	GO:0014910	regulation of smooth muscle cell migration	'3/99	79/20565	0.00656852	0.0463292	0.0349198	3	Cyp1b1/F3/Pdgfrb
PM specific, LPS induced	GO:0038034	signal transduction in absence of ligand	'3/99	79/20565	0.00656852	0.0463292	0.0349198	3	Tgfb2/Pf4/Csf2
PM specific, LPS induced	GO:0097192	extrinsic apoptotic signaling pathway in absence of ligand	'3/99	79/20565	0.00656852	0.0463292	0.0349198	3	Tgfb2/Pf4/Csf2
PM specific, LPS induced	GO:0002366	leukocyte activation involved in immune response	'5/99	246/20565	0.00676175	0.0475589	0.0358466	5	Clec4d/Cd177/Slamf6/Adora2b/Clec4e
PM specific, LPS induced	GO:1900407	regulation of cellular response to oxidative stress	'3/99	80/20565	0.00680091	0.0477011	0.0359538	3	Fzd1/Met/Lrrk2
PM specific, LPS induced	GO:0035412	regulation of catenin import into nucleus	'2/99	26/20565	0.00691535	0.0482351	0.0363563	2	Fzd1/Egfr
PM specific, LPS induced	GO:0090077	foam cell differentiation	'2/99	26/20565	0.00691535	0.0482351	0.0363563	2	Pf4/Csf2
PM specific, LPS induced	GO:0048545	response to steroid hormone	'5/99	248/20565	0.00699094	0.0484209	0.0364963	5	Tgfb2/Areg/Calcr/Ass1/Ddit4
PM specific, LPS induced	GO:0035296	regulation of tube diameter	'4/99	157/20565	0.00702104	0.0484209	0.0364963	4	Ptgs2/Egfr/Adora2b/Adrb2
PM specific, LPS induced	GO:0097746	regulation of blood vessel diameter	'4/99	157/20565	0.00702104	0.0484209	0.0364963	4	Ptgs2/Egfr/Adora2b/Adrb2
PM specific, LPS induced	GO:0030279	negative regulation of ossification	'3/99	81/20565	0.00703814	0.0484209	0.0364963	3	Areg/Calcr/Adrb2
PM specific, LPS induced	GO:0043534	blood vessel endothelial cell migration	'3/99	81/20565	0.00703814	0.0484209	0.0364963	3	Thbs1/Ptgs2/Efnb2
PM specific, LPS induced	GO:0002263	cell activation involved in immune response	'5/99	250/20565	0.00722552	0.0495745	0.0373659	5	Clec4d/Cd177/Slamf6/Adora2b/Clec4e
KC specific, Age induced	GO:0019886	antigen processing and presentation of exogenous peptide antigen via MHC class II	'3/27	13/20565	5.7216e-07	0.000552508	0.000307794	3	Cd74/H2-Aa/H2-Eb1
KC specific, Age induced	GO:0002495	antigen processing and presentation of peptide antigen via MHC class II	'3/27	18/20565	1.62532e-06	0.000552508	0.000307794	3	Cd74/H2-Aa/H2-Eb1
KC specific, Age induced	GO:0002504	antigen processing and presentation of peptide or polysaccharide antigen via MHC class II	'3/27	19/20565	1.92838e-06	0.000552508	0.000307794	3	Cd74/H2-Aa/H2-Eb1
KC specific, Age induced	GO:0002478	antigen processing and presentation of exogenous peptide antigen	'3/27	20/20565	2.2667e-06	0.000552508	0.000307794	3	Cd74/H2-Aa/H2-Eb1
KC specific, Age induced	GO:0019884	antigen processing and presentation of exogenous antigen	'3/27	25/20565	4.55319e-06	0.000784601	0.00043709	3	Cd74/H2-Aa/H2-Eb1
KC specific, Age induced	GO:0002250	adaptive immune response	'6/27	368/20565	6.78964e-06	0.000784601	0.00043709	6	Cd74/Jchain/Gzmb/Irf4/Xcl1/Treml4
KC specific, Age induced	GO:0019882	antigen processing and presentation	'4/27	95/20565	6.91232e-06	0.000784601	0.00043709	4	Cd74/H2-Aa/H2-Eb1/Treml4
KC specific, Age induced	GO:0090023	positive regulation of neutrophil chemotaxis	'3/27	29/20565	7.20836e-06	0.000784601	0.00043709	3	Cd74/Ppbp/Xcl1
KC specific, Age induced	GO:0050670	regulation of lymphocyte proliferation	'5/27	215/20565	7.97918e-06	0.000784601	0.00043709	5	Cd74/H2-Aa/Cdkn2a/Xcl1/Mzb1
KC specific, Age induced	GO:0032944	regulation of mononuclear cell proliferation	'5/27	217/20565	8.34595e-06	0.000784601	0.00043709	5	Cd74/H2-Aa/Cdkn2a/Xcl1/Mzb1
KC specific, Age induced	GO:0071624	positive regulation of granulocyte chemotaxis	'3/27	31/20565	8.85191e-06	0.000784601	0.00043709	3	Cd74/Ppbp/Xcl1
KC specific, Age induced	GO:0070663	regulation of leukocyte proliferation	'5/27	225/20565	9.94721e-06	0.000808211	0.000450242	5	Cd74/H2-Aa/Cdkn2a/Xcl1/Mzb1
KC specific, Age induced	GO:0050868	negative regulation of T cell activation	'4/27	107/20565	1.10853e-05	0.000831396	0.000463158	4	Cd74/H2-Aa/Cdkn2a/Xcl1
KC specific, Age induced	GO:0090022	regulation of neutrophil chemotaxis	'3/27	35/20565	1.28439e-05	0.000834853	0.000465084	3	Cd74/Ppbp/Xcl1
KC specific, Age induced	GO:1902624	positive regulation of neutrophil migration	'3/27	35/20565	1.28439e-05	0.000834853	0.000465084	3	Cd74/Ppbp/Xcl1
KC specific, Age induced	GO:0002460	adaptive immune response based on somatic recombination of immune receptors built from immunoglobulin superfamily domains	'5/27	243/20565	1.44301e-05	0.000845505	0.000471018	5	Cd74/Gzmb/Irf4/Xcl1/Treml4
KC specific, Age induced	GO:1903038	negative regulation of leukocyte cell-cell adhesion	'4/27	115/20565	1.47442e-05	0.000845505	0.000471018	4	Cd74/H2-Aa/Cdkn2a/Xcl1
KC specific, Age induced	GO:0002683	negative regulation of immune system process	'6/27	426/20565	1.56093e-05	0.000845505	0.000471018	6	Cd74/H2-Aa/Cdkn2a/Irf4/Xcl1/Zfp36
KC specific, Age induced	GO:1902622	regulation of neutrophil migration	'3/27	43/20565	2.4049e-05	0.00123409	0.000687494	3	Cd74/Ppbp/Xcl1
KC specific, Age induced	GO:0098542	defense response to other organism	'6/27	469/20565	2.68442e-05	0.00130865	0.000729032	6	Cd207/Jchain/Irf4/Mpo/Isg15/Treml4
KC specific, Age induced	GO:0051250	negative regulation of lymphocyte activation	'4/27	138/20565	3.02169e-05	0.00140293	0.000781549	4	Cd74/H2-Aa/Cdkn2a/Xcl1
KC specific, Age induced	GO:0046651	lymphocyte proliferation	'5/27	301/20565	4.02709e-05	0.00176184	0.000981496	5	Cd74/H2-Aa/Cdkn2a/Xcl1/Mzb1
KC specific, Age induced	GO:0032943	mononuclear cell proliferation	'5/27	303/20565	4.15614e-05	0.00176184	0.000981496	5	Cd74/H2-Aa/Cdkn2a/Xcl1/Mzb1
KC specific, Age induced	GO:0071622	regulation of granulocyte chemotaxis	'3/27	53/20565	4.52527e-05	0.00183839	0.00102414	3	Cd74/Ppbp/Xcl1
KC specific, Age induced	GO:0032663	regulation of interleukin-2 production	'3/27	55/20565	5.05903e-05	0.00190318	0.00106023	3	Irf4/Xcl1/Zfp36
KC specific, Age induced	GO:0070661	leukocyte proliferation	'5/27	316/20565	5.07514e-05	0.00190318	0.00106023	5	Cd74/H2-Aa/Cdkn2a/Xcl1/Mzb1
KC specific, Age induced	GO:0002695	negative regulation of leukocyte activation	'4/27	161/20565	5.51863e-05	0.00199284	0.00111018	4	Cd74/H2-Aa/Cdkn2a/Xcl1
KC specific, Age induced	GO:0022408	negative regulation of cell-cell adhesion	'4/27	165/20565	6.07164e-05	0.00210028	0.00117003	4	Cd74/H2-Aa/Cdkn2a/Xcl1
KC specific, Age induced	GO:0048002	antigen processing and presentation of peptide antigen	'3/27	59/20565	6.24698e-05	0.00210028	0.00117003	3	Cd74/H2-Aa/H2-Eb1
KC specific, Age induced	GO:0032623	interleukin-2 production	'3/27	60/20565	6.57002e-05	0.00213526	0.00118952	3	Irf4/Xcl1/Zfp36
KC specific, Age induced	GO:0030888	regulation of B cell proliferation	'3/27	64/20565	7.97128e-05	0.0025071	0.00139667	3	Cd74/Cdkn2a/Mzb1
KC specific, Age induced	GO:0050866	negative regulation of cell activation	'4/27	180/20565	8.51059e-05	0.00259307	0.00144456	4	Cd74/H2-Aa/Cdkn2a/Xcl1
KC specific, Age induced	GO:0042130	negative regulation of T cell proliferation	'3/27	67/20565	9.1413e-05	0.00270084	0.0015046	3	H2-Aa/Cdkn2a/Xcl1
KC specific, Age induced	GO:0043900	regulation of multi-organism process	'5/27	373/20565	0.00011104	0.00291682	0.00162492	5	Cd74/Mpo/Isg15/Zfp36/Treml4
KC specific, Age induced	GO:1903706	regulation of hemopoiesis	'5/27	373/20565	0.00011104	0.00291682	0.00162492	5	Cd74/H2-Aa/Cdkn2a/Isg15/Zfp36
KC specific, Age induced	GO:0043903	regulation of symbiosis, encompassing mutualism through parasitism	'4/27	193/20565	0.000111437	0.00291682	0.00162492	4	Cd74/Mpo/Isg15/Zfp36
KC specific, Age induced	GO:0030099	myeloid cell differentiation	'5/27	374/20565	0.000112444	0.00291682	0.00162492	5	Cd74/Irf4/Isg15/Hoxb7/Zfp36
KC specific, Age induced	GO:0045089	positive regulation of innate immune response	'4/27	194/20565	0.000113681	0.00291682	0.00162492	4	Cd74/Irf4/Xcl1/Treml4
KC specific, Age induced	GO:0070374	positive regulation of ERK1 and ERK2 cascade	'4/27	201/20565	0.000130322	0.00325804	0.00181501	4	Cd74/Xcl1/Cysltr2/Scimp
KC specific, Age induced	GO:0051249	regulation of lymphocyte activation	'5/27	391/20565	0.000138467	0.00337513	0.00188024	5	Cd74/H2-Aa/Cdkn2a/Xcl1/Mzb1
KC specific, Age induced	GO:0032945	negative regulation of mononuclear cell proliferation	'3/27	80/20565	0.000155007	0.00359837	0.0020046	3	H2-Aa/Cdkn2a/Xcl1
KC specific, Age induced	GO:0050672	negative regulation of lymphocyte proliferation	'3/27	80/20565	0.000155007	0.00359837	0.0020046	3	H2-Aa/Cdkn2a/Xcl1
KC specific, Age induced	GO:0002830	positive regulation of type 2 immune response	'2/27	15/20565	0.00017247	0.00383114	0.00213427	2	Cd74/Xcl1
KC specific, Age induced	GO:0070664	negative regulation of leukocyte proliferation	'3/27	83/20565	0.000172893	0.00383114	0.00213427	3	H2-Aa/Cdkn2a/Xcl1
KC specific, Age induced	GO:0002702	positive regulation of production of molecular mediator of immune response	'3/27	84/20565	0.000179139	0.00388135	0.00216224	3	Cd74/Xcl1/Mzb1
KC specific, Age induced	GO:0002690	positive regulation of leukocyte chemotaxis	'3/27	87/20565	0.000198755	0.00421273	0.00234685	3	Cd74/Ppbp/Xcl1
KC specific, Age induced	GO:0002449	lymphocyte mediated immunity	'4/27	232/20565	0.00022588	0.00466511	0.00259887	4	Cd74/Gzmb/Xcl1/Treml4
KC specific, Age induced	GO:0002456	T cell mediated immunity	'3/27	92/20565	0.000234452	0.00466511	0.00259887	3	Gzmb/Xcl1/Treml4
KC specific, Age induced	GO:0030593	neutrophil chemotaxis	'3/27	92/20565	0.000234452	0.00466511	0.00259887	3	Cd74/Ppbp/Xcl1
KC specific, Age induced	GO:0045088	regulation of innate immune response	'4/27	237/20565	0.000245027	0.00477802	0.00266176	4	Cd74/Irf4/Xcl1/Treml4
KC specific, Age induced	GO:0045076	regulation of interleukin-2 biosynthetic process	'2/27	18/20565	0.000250704	0.00479286	0.00267003	2	Irf4/Zfp36
KC specific, Age induced	GO:0034341	response to interferon-gamma	'3/27	96/20565	0.000265819	0.00498411	0.00277657	3	H2-Aa/H2-Eb1/Xcl1
KC specific, Age induced	GO:0009615	response to virus	'4/27	245/20565	0.000278058	0.00511521	0.00284961	4	Cd207/Isg15/Xcl1/Treml4
KC specific, Age induced	GO:0030217	T cell differentiation	'4/27	250/20565	0.000300262	0.00539969	0.00300809	4	Cd74/H2-Aa/Cdkn2a/Irf4
KC specific, Age induced	GO:0007162	negative regulation of cell adhesion	'4/27	252/20565	0.000309491	0.00539969	0.00300809	4	Cd74/H2-Aa/Cdkn2a/Xcl1
KC specific, Age induced	GO:0042094	interleukin-2 biosynthetic process	'2/27	20/20565	0.000310827	0.00539969	0.00300809	2	Irf4/Zfp36
KC specific, Age induced	GO:0002694	regulation of leukocyte activation	'5/27	467/20565	0.000315674	0.00539969	0.00300809	5	Cd74/H2-Aa/Cdkn2a/Xcl1/Mzb1
KC specific, Age induced	GO:0042110	T cell activation	'5/27	472/20565	0.000331523	0.00557302	0.00310465	5	Cd74/H2-Aa/Cdkn2a/Irf4/Xcl1
KC specific, Age induced	GO:0009617	response to bacterium	'5/27	484/20565	0.000372031	0.00603044	0.00335947	5	Ppbp/Jchain/Mpo/Isg15/Zfp36
KC specific, Age induced	GO:1990266	neutrophil migration	'3/27	108/20565	0.000375856	0.00603044	0.00335947	3	Cd74/Ppbp/Xcl1
KC specific, Age induced	GO:0032703	negative regulation of interleukin-2 production	'2/27	22/20565	0.000377289	0.00603044	0.00335947	2	Xcl1/Zfp36
KC specific, Age induced	GO:0002688	regulation of leukocyte chemotaxis	'3/27	110/20565	0.000396636	0.00623742	0.00347478	3	Cd74/Ppbp/Xcl1
KC specific, Age induced	GO:0042100	B cell proliferation	'3/27	112/20565	0.000418142	0.00647125	0.00360504	3	Cd74/Cdkn2a/Mzb1
KC specific, Age induced	GO:0071621	granulocyte chemotaxis	'3/27	113/20565	0.000429171	0.00653815	0.00364231	3	Cd74/Ppbp/Xcl1
KC specific, Age induced	GO:0070372	regulation of ERK1 and ERK2 cascade	'4/27	282/20565	0.000473677	0.00709147	0.00395055	4	Cd74/Xcl1/Cysltr2/Scimp
KC specific, Age induced	GO:0050863	regulation of T cell activation	'4/27	283/20565	0.000480038	0.00709147	0.00395055	4	Cd74/H2-Aa/Cdkn2a/Xcl1
KC specific, Age induced	GO:0045730	respiratory burst	'2/27	25/20565	0.000488797	0.00711309	0.0039626	2	Jchain/Mpo
KC specific, Age induced	GO:0002700	regulation of production of molecular mediator of immune response	'3/27	122/20565	0.000536936	0.00758713	0.00422668	3	Cd74/Xcl1/Mzb1
KC specific, Age induced	GO:0050864	regulation of B cell activation	'3/27	122/20565	0.000536936	0.00758713	0.00422668	3	Cd74/Cdkn2a/Mzb1
KC specific, Age induced	GO:0031349	positive regulation of defense response	'4/27	296/20565	0.000568391	0.00791688	0.00441037	4	Cd74/Irf4/Xcl1/Treml4
KC specific, Age induced	GO:1903037	regulation of leukocyte cell-cell adhesion	'4/27	298/20565	0.000582944	0.00799391	0.00445329	4	Cd74/H2-Aa/Cdkn2a/Xcl1
KC specific, Age induced	GO:0070371	ERK1 and ERK2 cascade	'4/27	299/20565	0.00059032	0.00799391	0.00445329	4	Cd74/Xcl1/Cysltr2/Scimp
KC specific, Age induced	GO:0002443	leukocyte mediated immunity	'4/27	306/20565	0.000643823	0.008599	0.00479037	4	Cd74/Gzmb/Xcl1/Treml4
KC specific, Age induced	GO:0097530	granulocyte migration	'3/27	131/20565	0.000660672	0.0087048	0.00484931	3	Cd74/Ppbp/Xcl1
KC specific, Age induced	GO:0002687	positive regulation of leukocyte migration	'3/27	133/20565	0.00069043	0.00882366	0.00491553	3	Cd74/Ppbp/Xcl1
KC specific, Age induced	GO:0045580	regulation of T cell differentiation	'3/27	133/20565	0.00069043	0.00882366	0.00491553	3	Cd74/H2-Aa/Cdkn2a
KC specific, Age induced	GO:0050921	positive regulation of chemotaxis	'3/27	134/20565	0.000705625	0.00882366	0.00491553	3	Cd74/Ppbp/Xcl1
KC specific, Age induced	GO:0002828	regulation of type 2 immune response	'2/27	30/20565	0.000705893	0.00882366	0.00491553	2	Cd74/Xcl1
KC specific, Age induced	GO:0032733	positive regulation of interleukin-10 production	'2/27	31/20565	0.000753964	0.00918894	0.00511902	2	Irf4/Xcl1
KC specific, Age induced	GO:0043516	regulation of DNA damage response, signal transduction by p53 class mediator	'2/27	31/20565	0.000753964	0.00918894	0.00511902	2	Cd74/Cdkn2a
KC specific, Age induced	GO:0044403	symbiosis, encompassing mutualism through parasitism	'4/27	324/20565	0.000797142	0.00959522	0.00534536	4	Cd74/Mpo/Isg15/Zfp36
KC specific, Age induced	GO:0007159	leukocyte cell-cell adhesion	'4/27	328/20565	0.000834437	0.00980779	0.00546377	4	Cd74/H2-Aa/Cdkn2a/Xcl1
KC specific, Age induced	GO:1903707	negative regulation of hemopoiesis	'3/27	142/20565	0.00083492	0.00980779	0.00546377	3	Cd74/Cdkn2a/Zfp36
KC specific, Age induced	GO:0002697	regulation of immune effector process	'4/27	337/20565	0.000922849	0.0107116	0.0059673	4	Cd74/Xcl1/Mzb1/Treml4
KC specific, Age induced	GO:0043368	positive T cell selection	'2/27	35/20565	0.000961632	0.0110305	0.00614492	2	Cd74/Irf4
KC specific, Age induced	GO:0044419	interspecies interaction between organisms	'4/27	344/20565	0.000996049	0.0112924	0.00629083	4	Cd74/Mpo/Isg15/Zfp36
KC specific, Age induced	GO:0002720	positive regulation of cytokine production involved in immune response	'2/27	37/20565	0.00107464	0.0117728	0.00655843	2	Cd74/Xcl1
KC specific, Age induced	GO:0042092	type 2 immune response	'2/27	37/20565	0.00107464	0.0117728	0.00655843	2	Cd74/Xcl1
KC specific, Age induced	GO:0045581	negative regulation of T cell differentiation	'2/27	37/20565	0.00107464	0.0117728	0.00655843	2	Cd74/Cdkn2a
KC specific, Age induced	GO:0050792	regulation of viral process	'3/27	157/20565	0.00111603	0.0120904	0.00673536	3	Cd74/Isg15/Zfp36
KC specific, Age induced	GO:0001913	T cell mediated cytotoxicity	'2/27	39/20565	0.00119373	0.0127899	0.00712508	2	Gzmb/Xcl1
KC specific, Age induced	GO:0045619	regulation of lymphocyte differentiation	'3/27	162/20565	0.00122148	0.012945	0.00721149	3	Cd74/H2-Aa/Cdkn2a
KC specific, Age induced	GO:0042129	regulation of T cell proliferation	'3/27	163/20565	0.0012433	0.0129874	0.00723511	3	H2-Aa/Cdkn2a/Xcl1
KC specific, Age induced	GO:0043901	negative regulation of multi-organism process	'3/27	164/20565	0.00126536	0.0129874	0.00723511	3	Mpo/Isg15/Zfp36
KC specific, Age induced	GO:0030098	lymphocyte differentiation	'4/27	367/20565	0.00126544	0.0129874	0.00723511	4	Cd74/H2-Aa/Cdkn2a/Irf4
KC specific, Age induced	GO:0050870	positive regulation of T cell activation	'3/27	173/20565	0.00147512	0.0149817	0.00834607	3	Cd74/H2-Aa/Xcl1
KC specific, Age induced	GO:0022407	regulation of cell-cell adhesion	'4/27	389/20565	0.00156756	0.0157564	0.00877764	4	Cd74/H2-Aa/Cdkn2a/Xcl1
KC specific, Age induced	GO:0002685	regulation of leukocyte migration	'3/27	179/20565	0.00162641	0.0160049	0.00891607	3	Cd74/Ppbp/Xcl1
KC specific, Age induced	GO:0002639	positive regulation of immunoglobulin production	'2/27	46/20565	0.00165794	0.0160049	0.00891607	2	Xcl1/Mzb1
KC specific, Age induced	GO:0032653	regulation of interleukin-10 production	'2/27	46/20565	0.00165794	0.0160049	0.00891607	2	Irf4/Xcl1
KC specific, Age induced	GO:0045620	negative regulation of lymphocyte differentiation	'2/27	46/20565	0.00165794	0.0160049	0.00891607	2	Cd74/Cdkn2a
KC specific, Age induced	GO:0097529	myeloid leukocyte migration	'3/27	181/20565	0.00167892	0.0160485	0.00894036	3	Cd74/Ppbp/Xcl1
KC specific, Age induced	GO:0002440	production of molecular mediator of immune response	'3/27	182/20565	0.00170557	0.0160873	0.008962	3	Cd74/Xcl1/Mzb1
KC specific, Age induced	GO:0045646	regulation of erythrocyte differentiation	'2/27	47/20565	0.00173023	0.0160873	0.008962	2	Isg15/Zfp36
KC specific, Age induced	GO:1903039	positive regulation of leukocyte cell-cell adhesion	'3/27	183/20565	0.00173248	0.0160873	0.008962	3	Cd74/H2-Aa/Xcl1
KC specific, Age induced	GO:0050920	regulation of chemotaxis	'3/27	185/20565	0.00178711	0.016438	0.00915736	3	Cd74/Ppbp/Xcl1
KC specific, Age induced	GO:0032613	interleukin-10 production	'2/27	49/20565	0.00187924	0.0171239	0.00953948	2	Irf4/Xcl1
KC specific, Age induced	GO:1903708	positive regulation of hemopoiesis	'3/27	193/20565	0.00201637	0.0182034	0.0101408	3	Cd74/H2-Aa/Isg15
KC specific, Age induced	GO:0002699	positive regulation of immune effector process	'3/27	195/20565	0.00207642	0.0184046	0.0102529	3	Cd74/Xcl1/Mzb1
KC specific, Age induced	GO:0030595	leukocyte chemotaxis	'3/27	195/20565	0.00207642	0.0184046	0.0102529	3	Cd74/Ppbp/Xcl1
KC specific, Age induced	GO:0042098	T cell proliferation	'3/27	197/20565	0.00213757	0.018776	0.0104598	3	H2-Aa/Cdkn2a/Xcl1
KC specific, Age induced	GO:0045058	T cell selection	'2/27	53/20565	0.00219493	0.0191076	0.0106446	2	Cd74/Irf4
KC specific, Age induced	GO:0035019	somatic stem cell population maintenance	'2/27	54/20565	0.00227751	0.0196312	0.0109363	2	Cdkn2a/Erdr1
KC specific, Age induced	GO:0051607	defense response to virus	'3/27	202/20565	0.00229534	0.0196312	0.0109363	3	Cd207/Isg15/Treml4
KC specific, Age induced	GO:0070098	chemokine-mediated signaling pathway	'2/27	55/20565	0.00236154	0.0200218	0.0111538	2	Ppbp/Xcl1
KC specific, Age induced	GO:0045637	regulation of myeloid cell differentiation	'3/27	205/20565	0.00239339	0.0201169	0.0112068	3	Cd74/Isg15/Zfp36
KC specific, Age induced	GO:0034121	regulation of toll-like receptor signaling pathway	'2/27	56/20565	0.00244703	0.0203278	0.0113243	2	Irf4/Treml4
KC specific, Age induced	GO:0032845	negative regulation of homeostatic process	'3/27	207/20565	0.00246018	0.0203278	0.0113243	3	Cd74/Xcl1/Zfp36
KC specific, Age induced	GO:0030330	DNA damage response, signal transduction by p53 class mediator	'2/27	59/20565	0.00271216	0.0222215	0.0123793	2	Cd74/Cdkn2a
KC specific, Age induced	GO:0022409	positive regulation of cell-cell adhesion	'3/27	218/20565	0.00284827	0.0231422	0.0128922	3	Cd74/H2-Aa/Xcl1
KC specific, Age induced	GO:0002637	regulation of immunoglobulin production	'2/27	64/20565	0.00318275	0.0252636	0.014074	2	Xcl1/Mzb1
KC specific, Age induced	GO:0002718	regulation of cytokine production involved in immune response	'2/27	64/20565	0.00318275	0.0252636	0.014074	2	Cd74/Xcl1
KC specific, Age induced	GO:0043410	positive regulation of MAPK cascade	'4/27	473/20565	0.00318711	0.0252636	0.014074	4	Cd74/Xcl1/Cysltr2/Scimp
KC specific, Age induced	GO:1901796	regulation of signal transduction by p53 class mediator	'2/27	65/20565	0.00328113	0.0257992	0.0143724	2	Cd74/Cdkn2a
KC specific, Age induced	GO:0050778	positive regulation of immune response	'4/27	484/20565	0.00346084	0.0269946	0.0150383	4	Cd74/Irf4/Xcl1/Treml4
KC specific, Age induced	GO:0032844	regulation of homeostatic process	'4/27	497/20565	0.00380463	0.0294406	0.0164009	4	Cd74/Isg15/Xcl1/Zfp36
KC specific, Age induced	GO:0031397	negative regulation of protein ubiquitination	'2/27	71/20565	0.00390107	0.0297836	0.016592	2	Cdkn2a/Isg15
KC specific, Age induced	GO:0051251	positive regulation of lymphocyte activation	'3/27	244/20565	0.00391005	0.0297836	0.016592	3	Cd74/H2-Aa/Xcl1
KC specific, Age induced	GO:0042770	signal transduction in response to DNA damage	'2/27	73/20565	0.0041189	0.0311312	0.0173427	2	Cd74/Cdkn2a
KC specific, Age induced	GO:0016032	viral process	'3/27	250/20565	0.00418497	0.0313873	0.0174854	3	Cd74/Isg15/Zfp36
KC specific, Age induced	GO:0042113	B cell activation	'3/27	253/20565	0.00432675	0.0322029	0.0179397	3	Cd74/Cdkn2a/Mzb1
KC specific, Age induced	GO:0042742	defense response to bacterium	'3/27	255/20565	0.00442287	0.032669	0.0181994	3	Jchain/Mpo/Isg15
KC specific, Age induced	GO:0060326	cell chemotaxis	'3/27	263/20565	0.00482039	0.0353374	0.019686	3	Cd74/Ppbp/Xcl1
KC specific, Age induced	GO:0035710	CD4-positive, alpha-beta T cell activation	'2/27	81/20565	0.00504542	0.0364392	0.0202997	2	Irf4/Xcl1
KC specific, Age induced	GO:0048525	negative regulation of viral process	'2/27	81/20565	0.00504542	0.0364392	0.0202997	2	Isg15/Zfp36
KC specific, Age induced	GO:1903321	negative regulation of protein modification by small protein conjugation or removal	'2/27	82/20565	0.00516739	0.0369039	0.0205586	2	Cdkn2a/Isg15
KC specific, Age induced	GO:1902105	regulation of leukocyte differentiation	'3/27	270/20565	0.00518547	0.0369039	0.0205586	3	Cd74/H2-Aa/Cdkn2a
KC specific, Age induced	GO:0032103	positive regulation of response to external stimulus	'3/27	271/20565	0.00523896	0.0370144	0.0206201	3	Cd74/Ppbp/Xcl1
KC specific, Age induced	GO:0002367	cytokine production involved in immune response	'2/27	84/20565	0.00541538	0.0379856	0.0211612	2	Cd74/Xcl1
KC specific, Age induced	GO:0045582	positive regulation of T cell differentiation	'2/27	85/20565	0.0055414	0.0385919	0.021499	2	Cd74/H2-Aa
KC specific, Age induced	GO:0033077	T cell differentiation in thymus	'2/27	87/20565	0.00579747	0.0400889	0.0223329	2	Cd74/Cdkn2a
KC specific, Age induced	GO:0002696	positive regulation of leukocyte activation	'3/27	284/20565	0.00596484	0.0409558	0.0228159	3	Cd74/H2-Aa/Xcl1
KC specific, Age induced	GO:1902106	negative regulation of leukocyte differentiation	'2/27	90/20565	0.00619161	0.0422155	0.0235176	2	Cd74/Cdkn2a
KC specific, Age induced	GO:0002224	toll-like receptor signaling pathway	'2/27	91/20565	0.00632564	0.0428299	0.0238599	2	Irf4/Treml4
KC specific, Age induced	GO:0048872	homeostasis of number of cells	'3/27	296/20565	0.00668608	0.0449581	0.0250455	3	Cd74/Isg15/Zfp36
KC specific, Age induced	GO:0050867	positive regulation of cell activation	'3/27	298/20565	0.00681113	0.0454853	0.0253392	3	Cd74/H2-Aa/Xcl1
KC specific, Age induced	GO:0045639	positive regulation of myeloid cell differentiation	'2/27	95/20565	0.00687499	0.0455994	0.0254028	2	Cd74/Isg15
KC specific, Age induced	GO:0001909	leukocyte mediated cytotoxicity	'2/27	97/20565	0.00715754	0.046524	0.0259178	2	Gzmb/Xcl1
KC specific, Age induced	GO:0045621	positive regulation of lymphocyte differentiation	'2/27	97/20565	0.00715754	0.046524	0.0259178	2	Cd74/H2-Aa
KC specific, Age induced	GO:2000106	regulation of leukocyte apoptotic process	'2/27	97/20565	0.00715754	0.046524	0.0259178	2	Cd74/Cdkn2a
KC specific, Age induced	GO:0042035	regulation of cytokine biosynthetic process	'2/27	98/20565	0.00730077	0.0471407	0.0262614	2	Irf4/Zfp36
KC specific, Age induced	GO:0050900	leukocyte migration	'3/27	308/20565	0.0074574	0.0478353	0.0266483	3	Cd74/Ppbp/Xcl1
KC specific, Age induced	GO:0032649	regulation of interferon-gamma production	'2/27	100/20565	0.00759112	0.0483748	0.0269489	2	Isg15/Xcl1
KC specific, Age induced	GO:0002821	positive regulation of adaptive immune response	'2/27	101/20565	0.00773824	0.0489921	0.0272928	2	Cd74/Xcl1
KC specific, Age reduced	GO:0034330	cell junction organization	'22/336	212/20565	6.48201e-12	1.40934e-08	1.128e-08	22	Cttn/Epb41l3/Ptprk/Phldb2/F2r/Gja1/Afdn/Dlg5/Itgb3/Fscn1/Cldn5/Rhod/Sorbs1/Fermt2/Tek/Cdh5/Dlc1/Gjc1/Lims2/Hdac7/Tns1/Shroom2
KC specific, Age reduced	GO:0001525	angiogenesis	'31/336	437/20565	7.83618e-12	1.40934e-08	1.128e-08	31	Loxl2/Cd59a/Sparc/Cyr61/Parva/Aqp1/Adm/Ahr/Jam3/Ddah1/Itgb3/Tal1/Fap/Lepr/Ctgf/Dab2ip/Jcad/Pdgfra/Flt1/Tie1/Rasip1/Tek/Col4a1/Tspan12/Tnfrsf12a/Cxcl10/Hbegf/Hdac7/Epas1/Shb/Angptl3
KC specific, Age reduced	GO:0031589	cell-substrate adhesion	'25/336	300/20565	2.97042e-11	3.56154e-08	2.85056e-08	25	Cttn/Ptprk/Ccdc80/Cyr61/Parva/Phldb2/Jam3/Bcar1/Dbn1/Itga2b/Itgb3/Net1/Fzd4/Ctgf/Vcam1/Bcam/Rhod/Sorbs1/Fermt2/Dmd/Tek/Tnfrsf12a/Dlc1/Lama5/Angptl3
KC specific, Age reduced	GO:0045216	cell-cell junction organization	'20/336	193/20565	6.17153e-11	5.54975e-08	4.44188e-08	20	Cttn/Epb41l3/Ptprk/Phldb2/F2r/Gja1/Afdn/Dlg5/Fscn1/Cldn5/Rhod/Sorbs1/Fermt2/Tek/Cdh5/Dlc1/Gjc1/Lims2/Hdac7/Shroom2
KC specific, Age reduced	GO:0034329	cell junction assembly	'18/336	167/20565	2.97721e-10	2.1418e-07	1.71424e-07	18	Cttn/Epb41l3/Ptprk/Phldb2/Gja1/Dlg5/Itgb3/Fscn1/Cldn5/Rhod/Sorbs1/Fermt2/Tek/Cdh5/Dlc1/Gjc1/Hdac7/Tns1
KC specific, Age reduced	GO:0030947	regulation of vascular endothelial growth factor receptor signaling pathway	'8/336	27/20565	7.91516e-09	4.74514e-06	3.79789e-06	8	Cd59a/Grb10/Nedd4/Fzd4/Dab2ip/Flt1/Tek/Tmem204
KC specific, Age reduced	GO:0001667	ameboidal-type cell migration	'23/336	342/20565	1.18214e-08	6.07449e-06	4.86187e-06	23	Loxl2/Ednrb/Stc1/Tgfbr3/Sparc/Aqp1/Nckap1/Bcar1/Schip1/Itgb3/Fap/Dab2ip/Jcad/Tek/Kitl/Syde1/Prr5l/Hbegf/Ptprg/Lama5/Hdac7/Tns1/Nr2f2
KC specific, Age reduced	GO:0048010	vascular endothelial growth factor receptor signaling pathway	'9/336	43/20565	2.57863e-08	1.15942e-05	9.27968e-06	9	Cd59a/Grb10/Nedd4/Bcar1/Fzd4/Dab2ip/Flt1/Tek/Tmem204
KC specific, Age reduced	GO:0090287	regulation of cellular response to growth factor stimulus	'19/336	250/20565	3.29924e-08	1.3186e-05	1.05537e-05	19	Cd59a/Ngf/Htra1/Tgfbr3/Cyr61/Grb10/Nedd4/Neo1/Fgfbp3/Hes1/Fzd4/Tgfb1i1/Cdkn2b/Dab2ip/Jcad/Dmd/Flt1/Tek/Tmem204
KC specific, Age reduced	GO:0035239	tube morphogenesis	'24/336	405/20565	6.34654e-08	2.25129e-05	1.80187e-05	24	Hmga2/Prickle1/Nckap1/Adm/Gja1/Ahr/Dlg5/Tead2/Hes1/Yap1/Dab2ip/Pdgfra/Flt1/Rasip1/Tek/Col4a1/Chd7/Cecr2/Dlc1/Cxcl10/Nfib/Tead1/Lama5/Tulp3
KC specific, Age reduced	GO:0007160	cell-matrix adhesion	'16/336	185/20565	6.88467e-08	2.25129e-05	1.80187e-05	16	Cttn/Ptprk/Phldb2/Jam3/Itga2b/Itgb3/Ctgf/Vcam1/Bcam/Rhod/Sorbs1/Fermt2/Dmd/Tek/Dlc1/Angptl3
KC specific, Age reduced	GO:0050678	regulation of epithelial cell proliferation	'21/336	323/20565	9.20578e-08	2.75943e-05	2.20858e-05	21	Ednrb/Htra1/Tgfbr3/Hmga2/Ptprk/Sparc/Ccnd2/Bmp6/Sfn/Gja1/Itgb3/Hes1/Yap1/Erbb2/Cdkn2b/Dab2ip/Jcad/Tek/Lims2/Nfib/Nr2f2
KC specific, Age reduced	GO:0050673	epithelial cell proliferation	'23/336	385/20565	1.04004e-07	2.87771e-05	2.30325e-05	23	Loxl2/Ednrb/Htra1/Tgfbr3/Hmga2/Ptprk/Sparc/Ccnd2/Bmp6/Sfn/Gja1/Itgb3/Fap/Hes1/Yap1/Erbb2/Cdkn2b/Dab2ip/Jcad/Tek/Lims2/Nfib/Nr2f2
KC specific, Age reduced	GO:0007265	Ras protein signal transduction	'20/336	311/20565	2.23249e-07	5.7359e-05	4.59087e-05	20	Ngf/F2r/Rhoj/Nckap1/Arhgef5/Rasgrf2/Net1/Psd3/Arhgef28/Prex2/Erbb2/Dab2ip/Kitl/Farp2/Arap3/Dlc1/Cdc42ep1/Rasal2/Arhgef10/Rtkn
KC specific, Age reduced	GO:0001101	response to acid chemical	'17/336	232/20565	2.96326e-07	6.89632e-05	5.51964e-05	17	Ngf/Tgfbr3/Adcy6/Atp2b4/Krt8/Aqp1/Tead2/Yap1/Mest/Map7/Scd1/Pdgfra/Tie1/Tek/Col4a1/Pdk4/Tead1
KC specific, Age reduced	GO:2000147	positive regulation of cell motility	'25/336	476/20565	3.34292e-07	6.89632e-05	5.51964e-05	25	Cavin1/Sparc/Cyr61/F2r/Aqp1/Fam110c/Bcar1/Pawr/Itga2b/Itgb3/Rhod/Trip6/Sema6d/Dab2ip/Jcad/Pdgfra/Flt1/Tek/Kitl/Syde1/Cxcl10/Hbegf/Il1r1/Hdac7/Angptl3
KC specific, Age reduced	GO:0035329	hippo signaling	'7/336	29/20565	3.34555e-07	6.89632e-05	5.51964e-05	7	Wwc2/Amotl2/Dlg5/Wtip/Tead2/Yap1/Tead1
KC specific, Age reduced	GO:0046578	regulation of Ras protein signal transduction	'16/336	208/20565	3.45104e-07	6.89632e-05	5.51964e-05	16	Ngf/F2r/Arhgef5/Rasgrf2/Net1/Psd3/Arhgef28/Prex2/Erbb2/Dab2ip/Kitl/Farp2/Arap3/Dlc1/Rasal2/Arhgef10
KC specific, Age reduced	GO:0007264	small GTPase mediated signal transduction	'23/336	416/20565	4.10815e-07	7.52908e-05	6.02608e-05	23	Ngf/F2r/Rhoj/Nckap1/Arhgef5/Rasgrf2/Bcar3/Net1/Psd3/Rhod/Arhgef28/Prex2/Erbb2/Dab2ip/Kitl/Farp2/Arap3/Dlc1/Cdc42ep1/Rgl1/Rasal2/Arhgef10/Rtkn
KC specific, Age reduced	GO:0007044	cell-substrate junction assembly	'10/336	76/20565	4.35493e-07	7.52908e-05	6.02608e-05	10	Cttn/Ptprk/Phldb2/Itgb3/Rhod/Sorbs1/Fermt2/Tek/Dlc1/Tns1
KC specific, Age reduced	GO:0032956	regulation of actin cytoskeleton organization	'19/336	295/20565	4.39563e-07	7.52908e-05	6.02608e-05	19	Arhgap28/Cttn/Phldb2/Nckap1/Jam3/Arhgef5/Dbn1/Itgb3/Fscn1/Sptbn1/Ctgf/Rhod/Prkcq/Tek/Dlc1/Cdc42ep1/Tpm1/Arhgef10/Shroom2
KC specific, Age reduced	GO:0060485	mesenchyme development	'17/336	243/20565	5.69444e-07	8.93857e-05	7.1542e-05	17	Loxl2/Ednrb/Tgfbr3/Nedd4/Phldb2/Nckap1/Gja1/Dlg5/Pawr/Tead2/Hes1/Tgfb1i1/Yap1/Dab2ip/Kitl/Tead1/Lama5
KC specific, Age reduced	GO:0051272	positive regulation of cellular component movement	'25/336	490/20565	5.71551e-07	8.93857e-05	7.1542e-05	25	Cavin1/Sparc/Cyr61/F2r/Aqp1/Fam110c/Bcar1/Pawr/Itga2b/Itgb3/Rhod/Trip6/Sema6d/Dab2ip/Jcad/Pdgfra/Flt1/Tek/Kitl/Syde1/Cxcl10/Hbegf/Il1r1/Hdac7/Angptl3
KC specific, Age reduced	GO:0030335	positive regulation of cell migration	'24/336	458/20565	6.02054e-07	9.02328e-05	7.22201e-05	24	Sparc/Cyr61/F2r/Aqp1/Fam110c/Bcar1/Pawr/Itga2b/Itgb3/Rhod/Trip6/Sema6d/Dab2ip/Jcad/Pdgfra/Flt1/Tek/Kitl/Syde1/Cxcl10/Hbegf/Il1r1/Hdac7/Angptl3
KC specific, Age reduced	GO:0060562	epithelial tube morphogenesis	'21/336	366/20565	7.28514e-07	0.000104819	8.38942e-05	21	Hmga2/Prickle1/Nckap1/Adm/Gja1/Ahr/Dlg5/Tead2/Hes1/Yap1/Pdgfra/Flt1/Rasip1/Tek/Col4a1/Cecr2/Dlc1/Cxcl10/Tead1/Lama5/Tulp3
KC specific, Age reduced	GO:0032970	regulation of actin filament-based process	'20/336	339/20565	8.72463e-07	0.000120702	9.66067e-05	20	Arhgap28/Cttn/Stc1/Phldb2/Nckap1/Jam3/Arhgef5/Dbn1/Itgb3/Fscn1/Sptbn1/Ctgf/Rhod/Prkcq/Tek/Dlc1/Cdc42ep1/Tpm1/Arhgef10/Shroom2
KC specific, Age reduced	GO:0051017	actin filament bundle assembly	'13/336	147/20565	9.15122e-07	0.000121915	9.75774e-05	13	Arhgap28/Phldb2/Arhgef5/Pawr/Dbn1/Fscn1/Ctgf/Rhod/Sorbs1/Prkcq/Dlc1/Tpm1/Arhgef10
KC specific, Age reduced	GO:0061572	actin filament bundle organization	'13/336	150/20565	1.15181e-06	0.000147966	0.000118428	13	Arhgap28/Phldb2/Arhgef5/Pawr/Dbn1/Fscn1/Ctgf/Rhod/Sorbs1/Prkcq/Dlc1/Tpm1/Arhgef10
KC specific, Age reduced	GO:0007015	actin filament organization	'20/336	346/20565	1.19808e-06	0.000148603	0.000118938	20	Arhgap28/Cttn/Phldb2/Nckap1/Arhgef5/Bcar1/Pawr/Dbn1/Fscn1/Sptbn1/Ctgf/Rhod/Sorbs1/Akap2/Prkcq/Dlc1/Cdc42ep1/Tpm1/Arhgef10/Shroom2
KC specific, Age reduced	GO:0030198	extracellular matrix organization	'15/336	207/20565	1.70724e-06	0.000204698	0.000163835	15	Loxl2/Ccdc80/Cyr61/Phldb2/Serpinh1/Lamb2/Itgb3/Fscn1/Fap/Ctgf/Csgalnact1/Pdgfra/Col4a1/Pxdn/Creb3l1
KC specific, Age reduced	GO:0043062	extracellular structure organization	'15/336	208/20565	1.8131e-06	0.000208237	0.000166668	15	Loxl2/Ccdc80/Cyr61/Phldb2/Serpinh1/Lamb2/Itgb3/Fscn1/Fap/Ctgf/Csgalnact1/Pdgfra/Col4a1/Pxdn/Creb3l1
KC specific, Age reduced	GO:0051056	regulation of small GTPase mediated signal transduction	'16/336	236/20565	1.85254e-06	0.000208237	0.000166668	16	Ngf/F2r/Arhgef5/Rasgrf2/Net1/Psd3/Arhgef28/Prex2/Erbb2/Dab2ip/Kitl/Farp2/Arap3/Dlc1/Rasal2/Arhgef10
KC specific, Age reduced	GO:0001570	vasculogenesis	'10/336	89/20565	1.92315e-06	0.000209623	0.000167777	10	Tgfbr3/Adm/Tead2/Fzd4/Yap1/Tie1/Rasip1/Tek/Gjc1/Hdac7
KC specific, Age reduced	GO:0045765	regulation of angiogenesis	'16/336	238/20565	2.0681e-06	0.000218793	0.000175116	16	Cd59a/Sparc/Aqp1/Adm/Ddah1/Itgb3/Dab2ip/Jcad/Flt1/Tie1/Tek/Tspan12/Tnfrsf12a/Cxcl10/Hdac7/Angptl3
KC specific, Age reduced	GO:0034332	adherens junction organization	'10/336	90/20565	2.13256e-06	0.000219167	0.000175415	10	Cttn/Ptprk/Phldb2/Afdn/Dlg5/Rhod/Sorbs1/Fermt2/Tek/Dlc1
KC specific, Age reduced	GO:0044057	regulation of system process	'24/336	496/20565	2.43843e-06	0.00024364	0.000195003	24	Cttn/Ednrb/Stc1/Atp2b4/F2r/Aqp1/Adm/Bmp6/Gja1/Ahr/Fgfbp3/Pawr/Dbn1/Inhbb/Ctgf/Dmpk/Dmd/Abcb1a/Ece1/Hbegf/Gjc1/Tpm1/Tead1/Epas1
KC specific, Age reduced	GO:0034333	adherens junction assembly	'9/336	76/20565	4.05861e-06	0.000394562	0.000315798	9	Cttn/Ptprk/Phldb2/Dlg5/Rhod/Sorbs1/Fermt2/Tek/Dlc1
KC specific, Age reduced	GO:0007266	Rho protein signal transduction	'13/336	169/20565	4.37496e-06	0.000414124	0.000331454	13	F2r/Rhoj/Arhgef5/Rasgrf2/Net1/Arhgef28/Prex2/Farp2/Arap3/Dlc1/Cdc42ep1/Arhgef10/Rtkn
KC specific, Age reduced	GO:0042692	muscle cell differentiation	'21/336	414/20565	5.10771e-06	0.000471088	0.000377047	21	Ednrb/Krt8/Prickle1/Adm/Neo1/Mbnl3/Syne1/Pdlim5/Hes1/Nexn/Dmpk/Chrnb1/Ddit3/Pdgfra/Dmd/Cxcl10/Ankrd1/Ifrd1/Gdf15/Epas1/Tmem204
KC specific, Age reduced	GO:0051493	regulation of cytoskeleton organization	'22/336	459/20565	7.49374e-06	0.000673875	0.000539352	22	Arhgap28/Cttn/Phldb2/Nckap1/Jam3/Arhgef5/Dbn1/Itgb3/Fscn1/Sptbn1/Ctgf/Rhod/Map1b/Prkcq/Nexn/Tek/Syde1/Dlc1/Cdc42ep1/Tpm1/Arhgef10/Shroom2
KC specific, Age reduced	GO:1901342	regulation of vasculature development	'16/336	264/20565	7.80685e-06	0.000684908	0.000548183	16	Cd59a/Sparc/Aqp1/Adm/Ddah1/Itgb3/Dab2ip/Jcad/Flt1/Tie1/Tek/Tspan12/Tnfrsf12a/Cxcl10/Hdac7/Angptl3
KC specific, Age reduced	GO:0022604	regulation of cell morphogenesis	'22/336	462/20565	8.30138e-06	0.000710954	0.000569029	22	Cttn/Ngf/Epb41l3/Sparc/Parva/Nedd4/Rhoj/Bcar1/Dbn1/Itgb3/Wtip/Syne1/Net1/Pdlim5/Map1b/Sh3d19/Fermt2/Arap3/Tnfrsf12a/Dlc1/Cdc42ep1/Ifrd1
KC specific, Age reduced	GO:0010631	epithelial cell migration	'15/336	237/20565	8.95188e-06	0.000748836	0.000599349	15	Loxl2/Stc1/Tgfbr3/Sparc/Aqp1/Bcar1/Itgb3/Fap/Dab2ip/Jcad/Tek/Hbegf/Ptprg/Hdac7/Nr2f2
KC specific, Age reduced	GO:0090132	epithelium migration	'15/336	239/20565	9.89912e-06	0.000809253	0.000647706	15	Loxl2/Stc1/Tgfbr3/Sparc/Aqp1/Bcar1/Itgb3/Fap/Dab2ip/Jcad/Tek/Hbegf/Ptprg/Hdac7/Nr2f2
KC specific, Age reduced	GO:0090130	tissue migration	'15/336	241/20565	1.09344e-05	0.00084528	0.000676541	15	Loxl2/Stc1/Tgfbr3/Sparc/Aqp1/Bcar1/Itgb3/Fap/Dab2ip/Jcad/Tek/Hbegf/Ptprg/Hdac7/Nr2f2
KC specific, Age reduced	GO:0010632	regulation of epithelial cell migration	'13/336	184/20565	1.10448e-05	0.00084528	0.000676541	13	Stc1/Tgfbr3/Sparc/Aqp1/Bcar1/Itgb3/Dab2ip/Jcad/Tek/Hbegf/Ptprg/Hdac7/Nr2f2
KC specific, Age reduced	GO:0031032	actomyosin structure organization	'13/336	184/20565	1.10448e-05	0.00084528	0.000676541	13	Arhgap28/Epb41l3/Krt8/Phldb2/Arhgef5/Cnn3/Ctgf/Sorbs1/Prkcq/Pdgfra/Dlc1/Tpm1/Arhgef10
KC specific, Age reduced	GO:0034446	substrate adhesion-dependent cell spreading	'9/336	86/20565	1.13548e-05	0.000850902	0.00068104	9	Parva/Bcar1/Dbn1/Itgb3/Net1/Fzd4/Fermt2/Tek/Lama5
KC specific, Age reduced	GO:0043410	positive regulation of MAPK cascade	'22/336	473/20565	1.19832e-05	0.000879663	0.00070406	22	F2r/Fgfbp3/Arhgef5/Itgb3/Map3k20/Lepr/Fzd4/Ctgf/Erbb2/Dab2ip/Jcad/Pdgfra/Flt1/Tek/Kitl/Ccl7/Ccl6/Fgf23/Gadd45g/Magi3/Ghr/Eda2r
KC specific, Age reduced	GO:0007045	cell-substrate adherens junction assembly	'8/336	67/20565	1.31751e-05	0.000929234	0.000743735	8	Cttn/Ptprk/Phldb2/Rhod/Sorbs1/Fermt2/Tek/Dlc1
KC specific, Age reduced	GO:0048041	focal adhesion assembly	'8/336	67/20565	1.31751e-05	0.000929234	0.000743735	8	Cttn/Ptprk/Phldb2/Rhod/Sorbs1/Fermt2/Tek/Dlc1
KC specific, Age reduced	GO:0003007	heart morphogenesis	'15/336	250/20565	1.6882e-05	0.00116778	0.000934659	15	Tgfbr3/Cyr61/Parva/Nedd4/Gja1/Ahr/Tead2/Hes1/Yap1/Tek/Chd7/Dlc1/Ankrd1/Tpm1/Tead1
KC specific, Age reduced	GO:0070372	regulation of ERK1 and ERK2 cascade	'16/336	282/20565	1.77436e-05	0.00120422	0.000963828	16	Cyr61/F2r/Fgfbp3/Itgb3/Gstp1/Ctgf/Timp3/Erbb2/Dab2ip/Pdgfra/Dmd/Tek/Ccl7/Ece1/Ccl6/Fgf23
KC specific, Age reduced	GO:0050808	synapse organization	'16/336	284/20565	1.93528e-05	0.00128911	0.00103177	16	Nedd4/F2r/Lamb2/Dlg5/Dbn1/Pdlim5/Pcdhgc4/Dmpk/Chrnb1/Erbb2/Pcdhgc3/Dab2ip/Cacnb3/Col4a1/Adgrl1/Amigo2
KC specific, Age reduced	GO:0016049	cell growth	'22/336	490/20565	2.06259e-05	0.00134893	0.00107965	22	Cttn/Ngf/Epb41l3/Htra1/Tgfbr3/Cyr61/Sfn/Gja1/Lamb2/Dbn1/Itgb3/Pdlim5/Igfbp7/Ctgf/Map1b/Erbb2/Dab2ip/Tnfrsf12a/Hbegf/Kmt2d/Socs2/Ifrd1
KC specific, Age reduced	GO:0030038	contractile actin filament bundle assembly	'9/336	93/20565	2.14899e-05	0.00135612	0.00108541	9	Arhgap28/Phldb2/Arhgef5/Ctgf/Sorbs1/Prkcq/Dlc1/Tpm1/Arhgef10
KC specific, Age reduced	GO:0043149	stress fiber assembly	'9/336	93/20565	2.14899e-05	0.00135612	0.00108541	9	Arhgap28/Phldb2/Arhgef5/Ctgf/Sorbs1/Prkcq/Dlc1/Tpm1/Arhgef10
KC specific, Age reduced	GO:0110053	regulation of actin filament organization	'14/336	230/20565	2.74622e-05	0.00169204	0.00135427	14	Arhgap28/Cttn/Phldb2/Nckap1/Arhgef5/Dbn1/Sptbn1/Ctgf/Prkcq/Dlc1/Cdc42ep1/Tpm1/Arhgef10/Shroom2
KC specific, Age reduced	GO:0032231	regulation of actin filament bundle assembly	'9/336	96/20565	2.77538e-05	0.00169204	0.00135427	9	Arhgap28/Phldb2/Arhgef5/Dbn1/Ctgf/Prkcq/Dlc1/Tpm1/Arhgef10
KC specific, Age reduced	GO:0001654	eye development	'18/336	359/20565	2.82367e-05	0.00169279	0.00135487	18	Nectin3/Rhoj/Aqp1/Bmp6/Gja1/Lamb2/Ahr/Rcn1/Inhbb/Bcar3/Fzd4/Pdgfra/Flt1/Col4a1/Chd7/Tspan12/Shroom2/Tulp3
KC specific, Age reduced	GO:0060326	cell chemotaxis	'15/336	263/20565	3.04993e-05	0.00179846	0.00143944	15	Ednrb/Parva/Jam3/Arhgef5/Bcar1/Saa2/Vcam1/Il17rc/Prkcq/Pdgfra/Flt1/Ccl7/Ccl6/Cxcl10/Hbegf
KC specific, Age reduced	GO:0035023	regulation of Rho protein signal transduction	'10/336	123/20565	3.47781e-05	0.00201769	0.00161491	10	F2r/Arhgef5/Rasgrf2/Net1/Arhgef28/Prex2/Farp2/Arap3/Dlc1/Arhgef10
KC specific, Age reduced	GO:0070371	ERK1 and ERK2 cascade	'16/336	299/20565	3.61649e-05	0.00204319	0.00163532	16	Cyr61/F2r/Fgfbp3/Itgb3/Gstp1/Ctgf/Timp3/Erbb2/Dab2ip/Pdgfra/Dmd/Tek/Ccl7/Ece1/Ccl6/Fgf23
KC specific, Age reduced	GO:0001701	in utero embryonic development	'20/336	436/20565	3.63537e-05	0.00204319	0.00163532	20	Tgfbr3/Cyr61/Krt8/Nckap1/Adm/Gja1/Rcn1/Hes1/Vcam1/Pdgfra/Tie1/Chd7/Ccnk/Brd4/Hbegf/Kmt2d/Tpm1/Mecom/Epas1/Nr2f2
KC specific, Age reduced	GO:0071800	podosome assembly	'5/336	24/20565	3.72061e-05	0.00205893	0.00164791	5	Arhgef5/Fscn1/Sh3pxd2a/Farp2/Palld
KC specific, Age reduced	GO:0007043	cell-cell junction assembly	'8/336	78/20565	4.05378e-05	0.00220931	0.00176828	8	Epb41l3/Gja1/Dlg5/Fscn1/Cldn5/Cdh5/Gjc1/Hdac7
KC specific, Age reduced	GO:0071900	regulation of protein serine/threonine kinase activity	'19/336	407/20565	4.49694e-05	0.00241425	0.00193231	19	Ccnd2/Atp2b4/F2r/Sfn/Arhgef5/Gstp1/Map3k20/Fzd4/Erbb2/Cdkn2b/Dab2ip/Flt1/Kitl/Ccnk/Gadd45g/Magi3/Ghr/Tead1/Nr2f2
KC specific, Age reduced	GO:0072012	glomerulus vasculature development	'5/336	25/20565	4.58879e-05	0.00242734	0.00194278	5	Aqp1/Itgb3/Hes1/Pdgfra/Tek
KC specific, Age reduced	GO:0032835	glomerulus development	'7/336	59/20565	4.80448e-05	0.00250355	0.00200378	7	Aqp1/Lamb2/Ahr/Itgb3/Hes1/Pdgfra/Tek
KC specific, Age reduced	GO:0032526	response to retinoic acid	'8/336	80/20565	4.87208e-05	0.00250355	0.00200378	8	Aqp1/Tead2/Yap1/Mest/Map7/Tie1/Tek/Tead1
KC specific, Age reduced	GO:0008015	blood circulation	'20/336	448/20565	5.30537e-05	0.00266287	0.00213129	20	Ednrb/Stc1/Tgfbr3/Adcy6/Atp2b4/F2r/Adm/Gja1/Ahr/Fgfbp3/Ddah1/Ctgf/Dmpk/Dmd/Chd7/Ece1/Hbegf/Tpm1/Epas1/Nr2f2
KC specific, Age reduced	GO:0051492	regulation of stress fiber assembly	'8/336	81/20565	5.33018e-05	0.00266287	0.00213129	8	Arhgap28/Phldb2/Arhgef5/Ctgf/Prkcq/Dlc1/Tpm1/Arhgef10
KC specific, Age reduced	GO:0061437	renal system vasculature development	'5/336	26/20565	5.60569e-05	0.00272482	0.00218088	5	Aqp1/Itgb3/Hes1/Pdgfra/Tek
KC specific, Age reduced	GO:0061440	kidney vasculature development	'5/336	26/20565	5.60569e-05	0.00272482	0.00218088	5	Aqp1/Itgb3/Hes1/Pdgfra/Tek
KC specific, Age reduced	GO:0040013	negative regulation of locomotion	'15/336	278/20565	5.75337e-05	0.00273547	0.0021894	15	Stc1/Tgfbr3/Ptprk/Phldb2/Dlg5/Dbn1/Sema6d/Dab2ip/Tie1/Arap3/Dlc1/Tpm1/Mid2/Ptprg/Nr2f2
KC specific, Age reduced	GO:0043010	camera-type eye development	'16/336	311/20565	5.78361e-05	0.00273547	0.0021894	16	Nectin3/Rhoj/Aqp1/Gja1/Lamb2/Ahr/Rcn1/Bcar3/Fzd4/Pdgfra/Flt1/Col4a1/Chd7/Tspan12/Shroom2/Tulp3
KC specific, Age reduced	GO:0010810	regulation of cell-substrate adhesion	'12/336	186/20565	5.85575e-05	0.00273547	0.0021894	12	Ccdc80/Cyr61/Phldb2/Bcar1/Dbn1/Itgb3/Net1/Fzd4/Rhod/Dmd/Tek/Dlc1
KC specific, Age reduced	GO:0003013	circulatory system process	'20/336	452/20565	5.99759e-05	0.00274655	0.00219827	20	Ednrb/Stc1/Tgfbr3/Adcy6/Atp2b4/F2r/Adm/Gja1/Ahr/Fgfbp3/Ddah1/Ctgf/Dmpk/Dmd/Chd7/Ece1/Hbegf/Tpm1/Epas1/Nr2f2
KC specific, Age reduced	GO:0044089	positive regulation of cellular component biogenesis	'21/336	489/20565	6.03217e-05	0.00274655	0.00219827	21	Ide/Cttn/Phldb2/Aqp1/Nckap1/Ahr/Dlg5/Arhgef5/Fscn1/Tal1/Ctgf/Map1b/Prkcq/Tek/Palld/Adgrl1/Cdc42ep1/Amigo2/Tpm1/Sept9/Arhgef10
KC specific, Age reduced	GO:0043542	endothelial cell migration	'11/336	159/20565	6.33273e-05	0.00283007	0.00226512	11	Loxl2/Stc1/Sparc/Bcar1/Itgb3/Fap/Dab2ip/Jcad/Tek/Hdac7/Nr2f2
KC specific, Age reduced	GO:0033674	positive regulation of kinase activity	'20/336	454/20565	6.37297e-05	0.00283007	0.00226512	20	Ccnd2/Cyr61/Atp2b4/F2r/Arhgef5/Itgb3/Map3k20/Mmd/Fzd4/Erbb2/Dab2ip/Pdgfra/Flt1/Tek/Kitl/Ccnk/Gadd45g/Magi3/Ghr/Tead1
KC specific, Age reduced	GO:0007163	establishment or maintenance of cell polarity	'12/336	188/20565	6.49284e-05	0.00284325	0.00227566	12	Parva/Aqp1/Nckap1/Gja1/Jam3/Dlg5/Fscn1/Hes1/Map1b/Tek/Cdh5/Pard6g
KC specific, Age reduced	GO:0090100	positive regulation of transmembrane receptor protein serine/threonine kinase signaling pathway	'9/336	107/20565	6.56074e-05	0.00284325	0.00227566	9	Tgfbr3/Cyr61/Neo1/Bmp6/Inhbb/Hes1/Tgfb1i1/Cdkn2b/Gdf15
KC specific, Age reduced	GO:0050680	negative regulation of epithelial cell proliferation	'10/336	133/20565	6.77612e-05	0.00290163	0.00232239	10	Tgfbr3/Ptprk/Sparc/Sfn/Gja1/Cdkn2b/Dab2ip/Lims2/Nfib/Nr2f2
KC specific, Age reduced	GO:0007178	transmembrane receptor protein serine/threonine kinase signaling pathway	'16/336	317/20565	7.24497e-05	0.0030659	0.00245387	16	Htra1/Tgfbr3/Ptprk/Cyr61/Neo1/Bmp6/Inhbb/Cldn5/Hes1/Tgfb1i1/Sptbn1/Akap2/Fermt2/Cdkn2b/Cdh5/Gdf15
KC specific, Age reduced	GO:0048762	mesenchymal cell differentiation	'12/336	191/20565	7.56043e-05	0.00316219	0.00253094	12	Loxl2/Ednrb/Tgfbr3/Phldb2/Gja1/Dlg5/Pawr/Hes1/Tgfb1i1/Dab2ip/Kitl/Lama5
KC specific, Age reduced	GO:1903522	regulation of blood circulation	'13/336	223/20565	8.22825e-05	0.00340196	0.00272284	13	Stc1/Atp2b4/F2r/Adm/Gja1/Ahr/Ctgf/Dmpk/Dmd/Hbegf/Gjc1/Tpm1/Epas1
KC specific, Age reduced	GO:0008016	regulation of heart contraction	'11/336	165/20565	8.8441e-05	0.00359594	0.0028781	11	Stc1/Atp2b4/Adm/Gja1/Ctgf/Dmpk/Dmd/Hbegf/Gjc1/Tpm1/Epas1
KC specific, Age reduced	GO:0071902	positive regulation of protein serine/threonine kinase activity	'15/336	289/20565	8.89737e-05	0.00359594	0.0028781	15	Ccnd2/Atp2b4/F2r/Arhgef5/Map3k20/Fzd4/Erbb2/Dab2ip/Flt1/Kitl/Ccnk/Gadd45g/Magi3/Ghr/Tead1
KC specific, Age reduced	GO:0051271	negative regulation of cellular component movement	'14/336	259/20565	9.92631e-05	0.00396722	0.00317526	14	Stc1/Tgfbr3/Ptprk/Phldb2/Dlg5/Dbn1/Sema6d/Dab2ip/Tie1/Arap3/Dlc1/Tpm1/Ptprg/Nr2f2
KC specific, Age reduced	GO:0007528	neuromuscular junction development	'6/336	47/20565	0.00011107	0.00434351	0.00347644	6	Nedd4/F2r/Lamb2/Erbb2/Cacnb3/Col4a1
KC specific, Age reduced	GO:0048608	reproductive structure development	'19/336	436/20565	0.000111637	0.00434351	0.00347644	19	Htra1/Hmga2/Cyr61/Krt8/Adm/Bmp6/Id4/Ahr/Schip1/Hes1/Fzd4/Vcam1/Map7/Serpinb6b/Pdgfra/Kitl/Chd7/Epas1/Nr2f2
KC specific, Age reduced	GO:0030336	negative regulation of cell migration	'13/336	230/20565	0.000112301	0.00434351	0.00347644	13	Stc1/Tgfbr3/Ptprk/Phldb2/Dlg5/Sema6d/Dab2ip/Tie1/Arap3/Dlc1/Tpm1/Ptprg/Nr2f2
KC specific, Age reduced	GO:0009611	response to wounding	'19/336	437/20565	0.000115005	0.00439311	0.00351613	19	Cyr61/Phldb2/F2r/Aqp1/Adm/Neo1/Gja1/Lamb2/Dysf/Itga2b/Itgb3/Csrp1/Prkcq/Erbb2/Pdgfra/Tnfrsf12a/Hbegf/Tpm1/Ifrd1
KC specific, Age reduced	GO:0048872	homeostasis of number of cells	'15/336	296/20565	0.000116026	0.00439311	0.00351613	15	Tgfbr3/Heph/F2r/Afdn/Ahr/Jam3/Tal1/Map7/Kitl/Sfxn1/Kmt2a/Pmaip1/Rbfox2/Mecom/Epas1
KC specific, Age reduced	GO:0061458	reproductive system development	'19/336	440/20565	0.000125654	0.00470808	0.00376823	19	Htra1/Hmga2/Cyr61/Krt8/Adm/Bmp6/Id4/Ahr/Schip1/Hes1/Fzd4/Vcam1/Map7/Serpinb6b/Pdgfra/Kitl/Chd7/Epas1/Nr2f2
KC specific, Age reduced	GO:0110020	regulation of actomyosin structure organization	'8/336	92/20565	0.000132074	0.00489764	0.00391995	8	Arhgap28/Phldb2/Arhgef5/Ctgf/Prkcq/Dlc1/Tpm1/Arhgef10
KC specific, Age reduced	GO:0010594	regulation of endothelial cell migration	'9/336	120/20565	0.000159011	0.00583634	0.00467126	9	Stc1/Sparc/Bcar1/Itgb3/Dab2ip/Jcad/Tek/Hdac7/Nr2f2
KC specific, Age reduced	GO:1902903	regulation of supramolecular fiber organization	'15/336	306/20565	0.000166992	0.00606739	0.00485619	15	Arhgap28/Cttn/Phldb2/Nckap1/Arhgef5/Dbn1/Sptbn1/Ctgf/Map1b/Prkcq/Dlc1/Cdc42ep1/Tpm1/Arhgef10/Shroom2
KC specific, Age reduced	GO:0050900	leukocyte migration	'15/336	308/20565	0.000179241	0.00644731	0.00516027	15	Ednrb/Jam3/Arhgef5/Pawr/Itga2b/Itgb3/Vcam1/Il17rc/Flt1/Kitl/Ccl7/Ccl6/Cxcl10/Podxl/Il1r1
KC specific, Age reduced	GO:2000146	negative regulation of cell motility	'13/336	243/20565	0.000193599	0.00686755	0.00549661	13	Stc1/Tgfbr3/Ptprk/Phldb2/Dlg5/Sema6d/Dab2ip/Tie1/Arap3/Dlc1/Tpm1/Ptprg/Nr2f2
KC specific, Age reduced	GO:0045860	positive regulation of protein kinase activity	'18/336	418/20565	0.000195077	0.00686755	0.00549661	18	Ccnd2/Cyr61/Atp2b4/F2r/Arhgef5/Itgb3/Map3k20/Mmd/Fzd4/Erbb2/Dab2ip/Flt1/Kitl/Ccnk/Gadd45g/Magi3/Ghr/Tead1
KC specific, Age reduced	GO:2000736	regulation of stem cell differentiation	'6/336	52/20565	0.000196652	0.00686755	0.00549661	6	Prickle1/Tead2/Hes1/Yap1/Pdgfra/Ccnk
KC specific, Age reduced	GO:0006874	cellular calcium ion homeostasis	'18/336	419/20565	0.000200859	0.00694703	0.00556022	18	Ngf/Ednrb/Stc1/Atp2b4/F2r/Adm/Gja1/Pawr/Itgb3/Slc24a5/Dmpk/Ddit3/Pdgfra/Dmd/Cacnb3/Chd7/Cxcl10/Bok
KC specific, Age reduced	GO:0003073	regulation of systemic arterial blood pressure	'8/336	99/20565	0.000220108	0.00754028	0.00603505	8	F2r/Adm/Gja1/Ahr/Ddah1/Ece1/Tpm1/Nr2f2
KC specific, Age reduced	GO:0001558	regulation of cell growth	'17/336	387/20565	0.000231874	0.00786842	0.00629768	17	Cttn/Ngf/Epb41l3/Htra1/Cyr61/Sfn/Gja1/Dbn1/Igfbp7/Ctgf/Map1b/Erbb2/Dab2ip/Tnfrsf12a/Hbegf/Socs2/Ifrd1
KC specific, Age reduced	GO:0042060	wound healing	'16/336	353/20565	0.000248688	0.00834355	0.00667797	16	Cyr61/Phldb2/F2r/Aqp1/Gja1/Dysf/Itga2b/Itgb3/Csrp1/Prkcq/Erbb2/Pdgfra/Tnfrsf12a/Hbegf/Tpm1/Ifrd1
KC specific, Age reduced	GO:0061138	morphogenesis of a branching epithelium	'12/336	217/20565	0.000250515	0.00834355	0.00667797	12	Hmga2/Ntn4/Adm/Ahr/Dlg5/Yap1/Pdgfra/Flt1/Rasip1/Tek/Col4a1/Lama5
KC specific, Age reduced	GO:0060401	cytosolic calcium ion transport	'10/336	156/20565	0.000253064	0.0083511	0.00668401	10	Ngf/F2r/Pawr/Itgb3/Ctgf/Ddit3/Dmd/Cacnb3/Chd7/Cxcl10
KC specific, Age reduced	GO:0021700	developmental maturation	'14/336	284/20565	0.000258607	0.00845644	0.00676832	14	Ngf/Ednrb/Ntn4/Gja1/Npr2/Tal1/Hes1/Ddit3/Dab2ip/Cdh5/Farp2/Adgrl1/Epas1/Shb
KC specific, Age reduced	GO:0072001	renal system development	'14/336	285/20565	0.000268033	0.00868573	0.00695183	14	Aqp1/Bmp6/Lamb2/Ahr/Dlg5/Schip1/Itgb3/Hes1/Yap1/Pdgfra/Tek/Col4a1/Lama5/Mecom
KC specific, Age reduced	GO:0061298	retina vasculature development in camera-type eye	'4/336	20/20565	0.00027573	0.008777	0.00702489	4	Rhoj/Fzd4/Pdgfra/Col4a1
KC specific, Age reduced	GO:0072243	metanephric nephron epithelium development	'4/336	20/20565	0.00027573	0.008777	0.00702489	4	Aqp1/Lamb2/Hes1/Yap1
KC specific, Age reduced	GO:0051235	maintenance of location	'14/336	287/20565	0.000287775	0.0090774	0.00726532	14	Ngf/Epb41l3/Adcy6/F2r/Dbn1/Itgb3/Syne1/Mest/Trip6/Ddit3/Dmd/Chd7/Cxcl10/Angptl3
KC specific, Age reduced	GO:0048568	embryonic organ development	'19/336	470/20565	0.000290214	0.0090774	0.00726532	19	Cyr61/Krt8/Nckap1/Adm/Gja1/Ahr/Tal1/Tead2/Hes1/Vcam1/Yap1/Pdgfra/Kitl/Chd7/Kmt2a/Tead1/Epas1/Nr2f2/Tulp3
KC specific, Age reduced	GO:0055074	calcium ion homeostasis	'18/336	434/20565	0.000307437	0.00953319	0.00763012	18	Ngf/Ednrb/Stc1/Atp2b4/F2r/Adm/Gja1/Pawr/Itgb3/Slc24a5/Dmpk/Ddit3/Pdgfra/Dmd/Cacnb3/Chd7/Cxcl10/Bok
KC specific, Age reduced	GO:0030903	notochord development	'4/336	21/20565	0.000336244	0.0102828	0.00823007	4	Nckap1/Tead2/Yap1/Tead1
KC specific, Age reduced	GO:0010817	regulation of hormone levels	'19/336	476/20565	0.000339703	0.0102828	0.00823007	19	Ide/Adh7/Hmga2/Aqp1/Adm/Bmp6/Gja1/Schip1/Ica1/Inhbb/Dkk3/Gabbr1/Lepr/Fzd4/Pdgfra/Abcb1a/Chd7/Ece1/Fgf23
KC specific, Age reduced	GO:0001655	urogenital system development	'15/336	327/20565	0.000340186	0.0102828	0.00823007	15	Aqp1/Bmp6/Id4/Lamb2/Ahr/Dlg5/Schip1/Itgb3/Hes1/Yap1/Pdgfra/Tek/Col4a1/Lama5/Mecom
KC specific, Age reduced	GO:0072503	cellular divalent inorganic cation homeostasis	'18/336	443/20565	0.000392634	0.0117692	0.00941977	18	Ngf/Ednrb/Stc1/Atp2b4/F2r/Adm/Gja1/Pawr/Itgb3/Slc24a5/Dmpk/Ddit3/Pdgfra/Dmd/Cacnb3/Chd7/Cxcl10/Bok
KC specific, Age reduced	GO:0044236	multicellular organism metabolic process	'8/336	108/20565	0.00039877	0.0118544	0.00948792	8	Tgfbr3/F2r/Serpinh1/Cyp2j6/Fap/Ctgf/Ghr/Creb3l1
KC specific, Age reduced	GO:0048339	paraxial mesoderm development	'4/336	22/20565	0.000405703	0.0118643	0.00949592	4	Nckap1/Tead2/Yap1/Tead1
KC specific, Age reduced	GO:2000737	negative regulation of stem cell differentiation	'4/336	22/20565	0.000405703	0.0118643	0.00949592	4	Prickle1/Hes1/Yap1/Ccnk
KC specific, Age reduced	GO:0048871	multicellular organismal homeostasis	'15/336	333/20565	0.000411824	0.0119462	0.00956145	15	Ednrb/Adcy6/F2r/Aqp1/Bmp6/Sfn/Itgb3/Lepr/Ctgf/Abca4/Scd1/Adgrf5/Kmt2a/Pdk4/Epas1
KC specific, Age reduced	GO:0051345	positive regulation of hydrolase activity	'19/336	484/20565	0.000417034	0.0119518	0.00956595	19	Cyr61/F2r/Afdn/Arhgef5/Pawr/Net1/Ctgf/Erbb2/Pdgfra/Flt1/Ppp1r15a/Ccl7/Ccl6/Dlc1/Tbc1d15/Bok/Tpm1/Pmaip1/Arhgef10
KC specific, Age reduced	GO:0007229	integrin-mediated signaling pathway	'7/336	83/20565	0.000418664	0.0119518	0.00956595	7	Bcar1/Itga2b/Itgb3/Ctgf/Fermt2/Lims2/Lama5
KC specific, Age reduced	GO:0071396	cellular response to lipid	'18/336	448/20565	0.000448286	0.0124871	0.00999436	18	Hmga2/Adcy6/Aqp1/Bmp6/Gstp1/Inhbb/Tead2/Yap1/Dab2ip/Pdk4/Cxcl10/Ifnb1/Kmt2d/Ankrd1/Nr3c2/Rbfox2/Tead1/Nr2f2
KC specific, Age reduced	GO:0034754	cellular hormone metabolic process	'7/336	84/20565	0.000450429	0.0124871	0.00999436	7	Adh7/Adm/Bmp6/Schip1/Dkk3/Pdgfra/Ece1
KC specific, Age reduced	GO:0003158	endothelium development	'8/336	110/20565	0.000451248	0.0124871	0.00999436	8	Stc1/Bmp6/Afdn/Cldn5/Dmd/Cdh5/Cxcl10/Nr2f2
KC specific, Age reduced	GO:0072006	nephron development	'9/336	138/20565	0.000451299	0.0124871	0.00999436	9	Aqp1/Lamb2/Ahr/Itgb3/Hes1/Yap1/Pdgfra/Tek/Lama5
KC specific, Age reduced	GO:0071695	anatomical structure maturation	'10/336	168/20565	0.000456951	0.012547	0.0100423	10	Ngf/Ednrb/Ntn4/Gja1/Npr2/Tal1/Ddit3/Cdh5/Farp2/Shb
KC specific, Age reduced	GO:0035330	regulation of hippo signaling	'3/336	10/20565	0.00047635	0.012823	0.0102632	3	Wwc2/Dlg5/Wtip
KC specific, Age reduced	GO:0045176	apical protein localization	'3/336	10/20565	0.00047635	0.012823	0.0102632	3	Nckap1/Dlg5/Shroom2
KC specific, Age reduced	GO:0046328	regulation of JNK cascade	'10/336	169/20565	0.0004788	0.012823	0.0102632	10	Arhgef5/Gstp1/Map3k20/Fzd4/Ctgf/Dab2ip/Gadd45g/Magi3/Eda2r/Mecom
KC specific, Age reduced	GO:0055072	iron ion homeostasis	'7/336	85/20565	0.000484088	0.012823	0.0102632	7	Steap1/Steap2/Heph/Neo1/Bmp6/Sfxn1/Epas1
KC specific, Age reduced	GO:0072207	metanephric epithelium development	'4/336	23/20565	0.00048483	0.012823	0.0102632	4	Aqp1/Lamb2/Hes1/Yap1
KC specific, Age reduced	GO:0045766	positive regulation of angiogenesis	'9/336	140/20565	0.000501275	0.0130719	0.0104625	9	Aqp1/Adm/Ddah1/Itgb3/Jcad/Flt1/Tek/Hdac7/Angptl3
KC specific, Age reduced	GO:0060491	regulation of cell projection assembly	'10/336	170/20565	0.000501509	0.0130719	0.0104625	10	Aqp1/Fam110c/Nckap1/Dbn1/Fscn1/Syne1/Prkcq/Cdc42ep1/Podxl/Sept9
KC specific, Age reduced	GO:0001763	morphogenesis of a branching structure	'12/336	235/20565	0.000514787	0.0132264	0.010586	12	Hmga2/Ntn4/Adm/Ahr/Dlg5/Yap1/Pdgfra/Flt1/Rasip1/Tek/Col4a1/Lama5
KC specific, Age reduced	GO:0060541	respiratory system development	'12/336	235/20565	0.000514787	0.0132264	0.010586	12	Hmga2/Sparc/Dlg5/Hes1/Ctgf/Yap1/Pdgfra/Chd7/Nfib/Lama5/Epas1/Tulp3
KC specific, Age reduced	GO:0032963	collagen metabolic process	'7/336	86/20565	0.000519721	0.0132584	0.0106117	7	Tgfbr3/F2r/Serpinh1/Cyp2j6/Fap/Ctgf/Creb3l1
KC specific, Age reduced	GO:0044259	multicellular organismal macromolecule metabolic process	'7/336	87/20565	0.000557412	0.0141198	0.0113011	7	Tgfbr3/F2r/Serpinh1/Cyp2j6/Fap/Ctgf/Creb3l1
KC specific, Age reduced	GO:0060216	definitive hemopoiesis	'4/336	24/20565	0.000574354	0.0144472	0.0115632	4	Tgfbr3/Tal1/Kmt2a/Rbfox2
KC specific, Age reduced	GO:0045834	positive regulation of lipid metabolic process	'9/336	143/20565	0.000584683	0.0146049	0.0116894	9	Cyr61/Bmp6/Sorbs1/Scd1/Pdgfra/Flt1/Tek/Adgrf5/Angptl3
KC specific, Age reduced	GO:0030323	respiratory tube development	'11/336	206/20565	0.000603262	0.01486	0.0118935	11	Hmga2/Sparc/Dlg5/Hes1/Ctgf/Yap1/Pdgfra/Nfib/Lama5/Epas1/Tulp3
KC specific, Age reduced	GO:0001935	endothelial cell proliferation	'8/336	115/20565	0.000607288	0.01486	0.0118935	8	Loxl2/Sparc/Bmp6/Gja1/Itgb3/Jcad/Tek/Nr2f2
KC specific, Age reduced	GO:0010634	positive regulation of epithelial cell migration	'8/336	115/20565	0.000607288	0.01486	0.0118935	8	Sparc/Aqp1/Bcar1/Itgb3/Jcad/Tek/Hbegf/Hdac7
KC specific, Age reduced	GO:0060402	calcium ion transport into cytosol	'9/336	144/20565	0.000614887	0.0149443	0.011961	9	Ngf/F2r/Pawr/Itgb3/Ddit3/Dmd/Cacnb3/Chd7/Cxcl10
KC specific, Age reduced	GO:0045927	positive regulation of growth	'13/336	276/20565	0.0006533	0.0157626	0.012616	13	Ngf/Tgfbr3/Hmga2/Sfn/Ahr/Dbn1/Yap1/Map1b/Erbb2/Chd7/Tnfrsf12a/Hbegf/Ghr
KC specific, Age reduced	GO:0035265	organ growth	'10/336	176/20565	0.000657323	0.0157626	0.012616	10	Stc1/Tgfbr3/Wwc2/Gja1/Ahr/Pdlim5/Lepr/Yap1/Map7/Pdgfra
KC specific, Age reduced	GO:0048638	regulation of developmental growth	'15/336	349/20565	0.00066914	0.0159397	0.0127577	15	Cttn/Ngf/Tgfbr3/Hmga2/Wwc2/Gja1/Ahr/Dbn1/Yap1/Map1b/Chd7/Tnfrsf12a/Socs2/Ghr/Ifrd1
KC specific, Age reduced	GO:0043406	positive regulation of MAP kinase activity	'11/336	210/20565	0.000707488	0.0166678	0.0133405	11	F2r/Arhgef5/Map3k20/Fzd4/Erbb2/Dab2ip/Flt1/Kitl/Gadd45g/Magi3/Ghr
KC specific, Age reduced	GO:0072507	divalent inorganic cation homeostasis	'18/336	466/20565	0.000708972	0.0166678	0.0133405	18	Ngf/Ednrb/Stc1/Atp2b4/F2r/Adm/Gja1/Pawr/Itgb3/Slc24a5/Dmpk/Ddit3/Pdgfra/Dmd/Cacnb3/Chd7/Cxcl10/Bok
KC specific, Age reduced	GO:0007422	peripheral nervous system development	'6/336	66/20565	0.000724919	0.0168862	0.0135153	6	Ngf/Ednrb/Lamb2/Erbb2/Dmd/Arhgef10
KC specific, Age reduced	GO:0010712	regulation of collagen metabolic process	'5/336	44/20565	0.00072765	0.0168862	0.0135153	5	F2r/Cyp2j6/Fap/Ctgf/Creb3l1
KC specific, Age reduced	GO:0048469	cell maturation	'10/336	179/20565	0.000749067	0.0172717	0.0138239	10	Ngf/Ednrb/Ntn4/Gja1/Npr2/Tal1/Hes1/Farp2/Epas1/Shb
KC specific, Age reduced	GO:0048754	branching morphogenesis of an epithelial tube	'10/336	180/20565	0.000781895	0.0179139	0.0143378	10	Hmga2/Ahr/Dlg5/Yap1/Pdgfra/Flt1/Rasip1/Tek/Col4a1/Lama5
KC specific, Age reduced	GO:0044246	regulation of multicellular organismal metabolic process	'5/336	45/20565	0.000807782	0.0183424	0.0146808	5	F2r/Cyp2j6/Fap/Ctgf/Creb3l1
KC specific, Age reduced	GO:0071560	cellular response to transforming growth factor beta stimulus	'10/336	181/20565	0.000815899	0.0183424	0.0146808	10	Htra1/Tgfbr3/Ptprk/Dbn1/Cldn5/Tgfb1i1/Fermt2/Cdkn2b/Cdh5/Ankrd1
KC specific, Age reduced	GO:0097529	myeloid leukocyte migration	'10/336	181/20565	0.000815899	0.0183424	0.0146808	10	Ednrb/Jam3/Arhgef5/Pawr/Il17rc/Flt1/Ccl7/Ccl6/Cxcl10/Il1r1
KC specific, Age reduced	GO:0061299	retina vasculature morphogenesis in camera-type eye	'3/336	12/20565	0.000852346	0.0188091	0.0150543	3	Rhoj/Fzd4/Col4a1
KC specific, Age reduced	GO:1902414	protein localization to cell junction	'3/336	12/20565	0.000852346	0.0188091	0.0150543	3	Nectin3/Afdn/Dlg5
KC specific, Age reduced	GO:1903430	negative regulation of cell maturation	'3/336	12/20565	0.000852346	0.0188091	0.0150543	3	Ednrb/Npr2/Shb
KC specific, Age reduced	GO:0071559	response to transforming growth factor beta	'10/336	183/20565	0.000887559	0.0194668	0.0155807	10	Htra1/Tgfbr3/Ptprk/Dbn1/Cldn5/Tgfb1i1/Fermt2/Cdkn2b/Cdh5/Ankrd1
KC specific, Age reduced	GO:1903429	regulation of cell maturation	'4/336	27/20565	0.000912713	0.0198971	0.0159252	4	Ngf/Ednrb/Npr2/Shb
KC specific, Age reduced	GO:0007204	positive regulation of cytosolic calcium ion concentration	'13/336	287/20565	0.000936303	0.0202884	0.0162384	13	Ngf/Ednrb/F2r/Adm/Gja1/Pawr/Itgb3/Ddit3/Pdgfra/Dmd/Cacnb3/Chd7/Cxcl10
KC specific, Age reduced	GO:0097553	calcium ion transmembrane import into cytosol	'8/336	123/20565	0.000945165	0.0203342	0.016275	8	Ngf/F2r/Pawr/Itgb3/Ddit3/Dmd/Chd7/Cxcl10
KC specific, Age reduced	GO:0007162	negative regulation of cell adhesion	'12/336	252/20565	0.00094972	0.0203342	0.016275	12	Phldb2/Dlg5/Bcar1/Pawr/Jam2/Vsig4/Gstp1/Fzd4/Erbb2/Dlc1/Ifnb1/Podxl
KC specific, Age reduced	GO:0090257	regulation of muscle system process	'11/336	218/20565	0.000961145	0.0204036	0.0163306	11	Cttn/Stc1/Atp2b4/F2r/Pawr/Dbn1/Ctgf/Dmpk/Dmd/Ece1/Tead1
KC specific, Age reduced	GO:0048863	stem cell differentiation	'10/336	185/20565	0.000964309	0.0204036	0.0163306	10	Ednrb/Prickle1/Tal1/Tead2/Hes1/Yap1/Pdgfra/Kitl/Ccnk/Lama5
KC specific, Age reduced	GO:0032964	collagen biosynthetic process	'5/336	47/20565	0.000987556	0.0207733	0.0166265	5	F2r/Serpinh1/Cyp2j6/Ctgf/Creb3l1
KC specific, Age reduced	GO:0046330	positive regulation of JNK cascade	'8/336	124/20565	0.00099629	0.0208352	0.016676	8	Arhgef5/Map3k20/Fzd4/Ctgf/Dab2ip/Gadd45g/Magi3/Eda2r
KC specific, Age reduced	GO:0007254	JNK cascade	'10/336	186/20565	0.00100468	0.0208891	0.0167191	10	Arhgef5/Gstp1/Map3k20/Fzd4/Ctgf/Dab2ip/Gadd45g/Magi3/Eda2r/Mecom
KC specific, Age reduced	GO:0051480	regulation of cytosolic calcium ion concentration	'14/336	327/20565	0.00104007	0.0215007	0.0172086	14	Ngf/Ednrb/F2r/Adm/Gja1/Pawr/Itgb3/Ddit3/Pdgfra/Dmd/Cacnb3/Chd7/Cxcl10/Bok
KC specific, Age reduced	GO:0035162	embryonic hemopoiesis	'4/336	28/20565	0.00105124	0.0216075	0.0172941	4	Ahr/Tal1/Kitl/Kmt2a
KC specific, Age reduced	GO:0051091	positive regulation of DNA binding transcription factor activity	'11/336	221/20565	0.00107383	0.0219464	0.0175653	11	Ngf/Tgfbr3/Hmga2/Arhgef5/Ankrd42/Fzd4/Prkcq/Ddit3/Eda2r/Ifrd1/Mid2
KC specific, Age reduced	GO:0051496	positive regulation of stress fiber assembly	'5/336	48/20565	0.00108783	0.0220851	0.0176764	5	Arhgef5/Ctgf/Prkcq/Tpm1/Arhgef10
KC specific, Age reduced	GO:0001553	luteinization	'3/336	13/20565	0.00109469	0.0220851	0.0176764	3	Schip1/Fzd4/Pdgfra
KC specific, Age reduced	GO:0050878	regulation of body fluid levels	'14/336	329/20565	0.00110224	0.0220851	0.0176764	14	Ednrb/Adcy6/F2r/Aqp1/Adm/Sfn/Gja1/Itga2b/Itgb3/Csrp1/Prkcq/Scd1/Pdgfra/Socs2
KC specific, Age reduced	GO:1902904	negative regulation of supramolecular fiber organization	'8/336	126/20565	0.00110518	0.0220851	0.0176764	8	Arhgap28/Phldb2/Dbn1/Sptbn1/Map1b/Dlc1/Tpm1/Shroom2
KC specific, Age reduced	GO:0003014	renal system process	'7/336	98/20565	0.00113322	0.0224871	0.0179981	7	Ednrb/Stc1/Adcy6/F2r/Aqp1/Adm/Gja1
KC specific, Age reduced	GO:1904018	positive regulation of vasculature development	'9/336	157/20565	0.00113779	0.0224871	0.0179981	9	Aqp1/Adm/Ddah1/Itgb3/Jcad/Flt1/Tek/Hdac7/Angptl3
KC specific, Age reduced	GO:0010595	positive regulation of endothelial cell migration	'6/336	72/20565	0.00114878	0.02258	0.0180725	6	Sparc/Bcar1/Itgb3/Jcad/Tek/Hdac7
KC specific, Age reduced	GO:0071229	cellular response to acid chemical	'9/336	158/20565	0.00118958	0.0231733	0.0185473	9	Ngf/Adcy6/Aqp1/Tead2/Yap1/Pdgfra/Col4a1/Pdk4/Tead1
KC specific, Age reduced	GO:0010517	regulation of phospholipase activity	'5/336	49/20565	0.00119545	0.0231733	0.0185473	5	Cyr61/Pdgfra/Flt1/Dlc1/Angptl3
KC specific, Age reduced	GO:0045446	endothelial cell differentiation	'7/336	99/20565	0.00120269	0.0231733	0.0185473	7	Stc1/Bmp6/Afdn/Cldn5/Dmd/Cdh5/Nr2f2
KC specific, Age reduced	GO:0003012	muscle system process	'15/336	370/20565	0.00120473	0.0231733	0.0185473	15	Cttn/Ednrb/Stc1/Atp2b4/F2r/Pawr/Dbn1/Pdlim5/Ctgf/Dmpk/Chrnb1/Dmd/Ece1/Tpm1/Tead1
KC specific, Age reduced	GO:0001837	epithelial to mesenchymal transition	'8/336	128/20565	0.00122336	0.0234066	0.018734	8	Loxl2/Tgfbr3/Phldb2/Gja1/Dlg5/Pawr/Tgfb1i1/Dab2ip
KC specific, Age reduced	GO:0002064	epithelial cell development	'11/336	226/20565	0.00128575	0.0244702	0.0195853	11	Stc1/Bmp6/Sfn/Gja1/Afdn/Lamb2/Cldn5/Map7/Dmd/Cdh5/Palld
KC specific, Age reduced	GO:0003018	vascular process in circulatory system	'10/336	193/20565	0.00132772	0.0250055	0.0200138	10	Ednrb/Tgfbr3/Adcy6/F2r/Adm/Gja1/Ahr/Fgfbp3/Ddah1/Ece1
KC specific, Age reduced	GO:0045785	positive regulation of cell adhesion	'15/336	374/20565	0.00133967	0.0250055	0.0200138	15	Ccdc80/Cyr61/Pawr/Dbn1/Itgb3/Net1/Hes1/Vcam1/Rhod/Prkcq/Erbb2/Dmd/Tek/Tpm1/Shb
KC specific, Age reduced	GO:0001936	regulation of endothelial cell proliferation	'7/336	101/20565	0.00135163	0.0250055	0.0200138	7	Sparc/Bmp6/Gja1/Itgb3/Jcad/Tek/Nr2f2
KC specific, Age reduced	GO:0048145	regulation of fibroblast proliferation	'7/336	101/20565	0.00135163	0.0250055	0.0200138	7	Aqp1/Pawr/Itgb3/Gstp1/Dab2ip/Pdgfra/Pmaip1
KC specific, Age reduced	GO:0032232	negative regulation of actin filament bundle assembly	'4/336	30/20565	0.00137139	0.0250055	0.0200138	4	Arhgap28/Phldb2/Dbn1/Dlc1
KC specific, Age reduced	GO:0045662	negative regulation of myoblast differentiation	'4/336	30/20565	0.00137139	0.0250055	0.0200138	4	Prickle1/Mbnl3/Ddit3/Cxcl10
KC specific, Age reduced	GO:0030949	positive regulation of vascular endothelial growth factor receptor signaling pathway	'3/336	14/20565	0.00137645	0.0250055	0.0200138	3	Grb10/Flt1/Tek
KC specific, Age reduced	GO:0071803	positive regulation of podosome assembly	'3/336	14/20565	0.00137645	0.0250055	0.0200138	3	Arhgef5/Fscn1/Palld
KC specific, Age reduced	GO:0072224	metanephric glomerulus development	'3/336	14/20565	0.00137645	0.0250055	0.0200138	3	Aqp1/Lamb2/Pdgfra
KC specific, Age reduced	GO:0001822	kidney development	'12/336	264/20565	0.00141347	0.0253992	0.0203289	12	Aqp1/Bmp6/Lamb2/Ahr/Dlg5/Schip1/Itgb3/Hes1/Yap1/Pdgfra/Tek/Lama5
KC specific, Age reduced	GO:0002262	myeloid cell homeostasis	'9/336	162/20565	0.00141612	0.0253992	0.0203289	9	Tgfbr3/Heph/Jam3/Tal1/Kitl/Sfxn1/Rbfox2/Mecom/Epas1
KC specific, Age reduced	GO:0072089	stem cell proliferation	'8/336	131/20565	0.0014193	0.0253992	0.0203289	8	Ngf/Hmga2/Id4/Yap1/Abcb1a/Kitl/Mecom/Shb
KC specific, Age reduced	GO:0001974	blood vessel remodeling	'5/336	51/20565	0.00143406	0.0255361	0.0204385	5	Tgfbr3/Gja1/Ahr/Chd7/Epas1
KC specific, Age reduced	GO:0043254	regulation of protein complex assembly	'15/336	377/20565	0.00144902	0.0256756	0.0205501	15	Ide/Cttn/Nckap1/Ahr/Arhgef5/Dbn1/Fscn1/Tal1/Sptbn1/Map1b/Dab2ip/Farp2/Palld/Cdc42ep1/Tpm1
KC specific, Age reduced	GO:0001503	ossification	'15/336	378/20565	0.0014871	0.0262211	0.0209867	15	Stc1/Tgfbr3/Cyr61/Bmp6/Gja1/Id4/Npr2/Gabbr1/Pdlim7/Ctgf/Csgalnact1/Fgf23/Rsad2/Creb3l1/Hdac7
KC specific, Age reduced	GO:0048144	fibroblast proliferation	'7/336	103/20565	0.00151461	0.0264539	0.0211731	7	Aqp1/Pawr/Itgb3/Gstp1/Dab2ip/Pdgfra/Pmaip1
KC specific, Age reduced	GO:0060537	muscle tissue development	'16/336	418/20565	0.00151714	0.0264539	0.0211731	16	Tgfbr3/Gja1/Ahr/Schip1/Pdlim5/Nexn/Pdgfra/Dmd/Chd7/Hivep3/Ankrd1/Gjc1/Tpm1/Ifrd1/Hdac7/Nr2f2
KC specific, Age reduced	GO:0051279	regulation of release of sequestered calcium ion into cytosol	'6/336	76/20565	0.00152237	0.0264539	0.0211731	6	Ngf/F2r/Itgb3/Dmd/Chd7/Cxcl10
KC specific, Age reduced	GO:0051494	negative regulation of cytoskeleton organization	'8/336	133/20565	0.00156322	0.0270332	0.0216367	8	Arhgap28/Phldb2/Dbn1/Sptbn1/Map1b/Dlc1/Tpm1/Shroom2
KC specific, Age reduced	GO:0060047	heart contraction	'10/336	198/20565	0.00160664	0.0276512	0.0221313	10	Stc1/Atp2b4/Adm/Gja1/Ctgf/Dmpk/Dmd/Hbegf/Tpm1/Epas1
KC specific, Age reduced	GO:0019216	regulation of lipid metabolic process	'13/336	305/20565	0.00161787	0.0277118	0.0221798	13	Cyr61/Bmp6/Dkk3/Igfbp7/Sorbs1/Scd1/Dab2ip/Pdgfra/Flt1/Tek/Adgrf5/Pdk4/Angptl3
KC specific, Age reduced	GO:0032535	regulation of cellular component size	'14/336	344/20565	0.0016757	0.0283071	0.0226563	14	Cttn/Ngf/Aqp1/Nckap1/Ahr/Dbn1/Sptbn1/Map1b/Ppp1r15a/Tnfrsf12a/Cdc42ep1/Tpm1/Ifrd1/Shroom2
KC specific, Age reduced	GO:0051209	release of sequestered calcium ion into cytosol	'7/336	105/20565	0.0016925	0.0283071	0.0226563	7	Ngf/F2r/Itgb3/Ddit3/Dmd/Chd7/Cxcl10
KC specific, Age reduced	GO:0051283	negative regulation of sequestering of calcium ion	'7/336	105/20565	0.0016925	0.0283071	0.0226563	7	Ngf/F2r/Itgb3/Ddit3/Dmd/Chd7/Cxcl10
KC specific, Age reduced	GO:0010644	cell communication by electrical coupling	'3/336	15/20565	0.00169985	0.0283071	0.0226563	3	Gja1/Dbn1/Gjc1
KC specific, Age reduced	GO:0017014	protein nitrosylation	'3/336	15/20565	0.00169985	0.0283071	0.0226563	3	Atp2b4/Ddah1/Dmd
KC specific, Age reduced	GO:1900119	positive regulation of execution phase of apoptosis	'3/336	15/20565	0.00169985	0.0283071	0.0226563	3	Fap/Dlc1/Bok
KC specific, Age reduced	GO:0003206	cardiac chamber morphogenesis	'8/336	135/20565	0.00171846	0.0284853	0.0227989	8	Tgfbr3/Cyr61/Parva/Ahr/Hes1/Tek/Chd7/Tpm1
KC specific, Age reduced	GO:0051495	positive regulation of cytoskeleton organization	'10/336	200/20565	0.00173073	0.0285571	0.0228564	10	Cttn/Nckap1/Arhgef5/Ctgf/Map1b/Prkcq/Tek/Cdc42ep1/Tpm1/Arhgef10
KC specific, Age reduced	GO:0008202	steroid metabolic process	'12/336	271/20565	0.00176118	0.0289268	0.0231523	12	Adm/Bmp6/Schip1/Dkk3/Lepr/Igfbp7/Scd1/Pdgfra/Fgf23/G6pc/Soat2/Angptl3
KC specific, Age reduced	GO:0002791	regulation of peptide secretion	'17/336	465/20565	0.00178236	0.0290906	0.0232834	17	Hmga2/F2r/Neo1/Gja1/Cyp2j6/Ica1/Inhbb/Gabbr1/Lepr/Sptbn1/Rhbdf1/Il17rc/Prkcq/Tek/Chd7/Rsad2/Ankrd1
KC specific, Age reduced	GO:0051282	regulation of sequestering of calcium ion	'7/336	106/20565	0.00178733	0.0290906	0.0232834	7	Ngf/F2r/Itgb3/Ddit3/Dmd/Chd7/Cxcl10
KC specific, Age reduced	GO:0003015	heart process	'10/336	201/20565	0.00179563	0.029094	0.0232861	10	Stc1/Atp2b4/Adm/Gja1/Ctgf/Dmpk/Dmd/Hbegf/Tpm1/Epas1
KC specific, Age reduced	GO:0120032	regulation of plasma membrane bounded cell projection assembly	'9/336	168/20565	0.00181982	0.0292739	0.0234301	9	Aqp1/Nckap1/Dbn1/Fscn1/Syne1/Prkcq/Cdc42ep1/Podxl/Sept9
KC specific, Age reduced	GO:0032870	cellular response to hormone stimulus	'17/336	466/20565	0.00182301	0.0292739	0.0234301	17	Hmga2/Adcy6/Grb10/Aqp1/Bcar1/Inhbb/Lepr/Sorbs1/Prkcq/Pdk4/Ifnb1/Kmt2d/Nr3c2/Rbfox2/Socs2/Ghr/Nr2f2
KC specific, Age reduced	GO:0002040	sprouting angiogenesis	'6/336	79/20565	0.00185835	0.0295124	0.023621	6	Loxl2/Parva/Jcad/Flt1/Tek/Hdac7
KC specific, Age reduced	GO:0035050	embryonic heart tube development	'6/336	79/20565	0.00185835	0.0295124	0.023621	6	Nckap1/Gja1/Tead2/Hes1/Yap1/Tead1
KC specific, Age reduced	GO:2000021	regulation of ion homeostasis	'10/336	202/20565	0.00186247	0.0295124	0.023621	10	Ngf/Ednrb/F2r/Gja1/Itgb3/Ddit3/Dmd/Chd7/Cxcl10/Bok
KC specific, Age reduced	GO:0001843	neural tube closure	'7/336	107/20565	0.00188623	0.0296278	0.0237134	7	Prickle1/Nckap1/Adm/Tead2/Cecr2/Dlc1/Tulp3
KC specific, Age reduced	GO:0051208	sequestering of calcium ion	'7/336	107/20565	0.00188623	0.0296278	0.0237134	7	Ngf/F2r/Itgb3/Ddit3/Dmd/Chd7/Cxcl10
KC specific, Age reduced	GO:0030324	lung development	'10/336	203/20565	0.00193132	0.0302041	0.0241746	10	Hmga2/Sparc/Dlg5/Hes1/Ctgf/Yap1/Pdgfra/Nfib/Lama5/Epas1
KC specific, Age reduced	GO:0010959	regulation of metal ion transport	'15/336	389/20565	0.00196431	0.0304612	0.0243804	15	Ngf/Stc1/Atp2b4/Nedd4/F2r/Gja1/Pawr/Itgb3/Hes1/Dmpk/Plcb4/Dmd/Cacnb3/Chd7/Cxcl10
KC specific, Age reduced	GO:1903053	regulation of extracellular matrix organization	'4/336	33/20565	0.00197047	0.0304612	0.0243804	4	Phldb2/Itgb3/Fscn1/Fap
KC specific, Age reduced	GO:0035148	tube formation	'9/336	170/20565	0.00197316	0.0304612	0.0243804	9	Prickle1/Nckap1/Adm/Tead2/Dab2ip/Cecr2/Dlc1/Nfib/Tulp3
KC specific, Age reduced	GO:0060606	tube closure	'7/336	108/20565	0.00198932	0.0305795	0.024475	7	Prickle1/Nckap1/Adm/Tead2/Cecr2/Dlc1/Tulp3
KC specific, Age reduced	GO:0048015	phosphatidylinositol-mediated signaling	'8/336	139/20565	0.0020654	0.0313705	0.0251082	8	F2r/Prex2/Erbb2/Dab2ip/Pdgfra/Flt1/Tek/Prr5l
KC specific, Age reduced	GO:0034331	cell junction maintenance	'3/336	16/20565	0.00206695	0.0313705	0.0251082	3	F2r/Afdn/Shroom2
KC specific, Age reduced	GO:0045603	positive regulation of endothelial cell differentiation	'3/336	16/20565	0.00206695	0.0313705	0.0251082	3	Bmp6/Cldn5/Cdh5
KC specific, Age reduced	GO:0042110	T cell activation	'17/336	472/20565	0.00208358	0.03149	0.0252038	17	Nedd4/Dlg5/Pawr/Ctps/Vsig4/Gimap1/Lepr/Hes1/Vcam1/Prkcq/Erbb2/Ctla2a/Chd7/Gadd45g/Ifnb1/Rsad2/Shb
KC specific, Age reduced	GO:0048147	negative regulation of fibroblast proliferation	'4/336	34/20565	0.00220479	0.0329633	0.026383	4	Pawr/Gstp1/Dab2ip/Pmaip1
KC specific, Age reduced	GO:0070661	leukocyte proliferation	'13/336	316/20565	0.00220771	0.0329633	0.026383	13	Ahr/Dlg5/Pawr/Ctps/Vsig4/Gstp1/Hes1/Vcam1/Prkcq/Erbb2/Kitl/Ifnb1/Shb
KC specific, Age reduced	GO:0002526	acute inflammatory response	'7/336	110/20565	0.00220855	0.0329633	0.026383	7	Cd59a/Cd55/Ednrb/Orm1/Gstp1/Cd163/Saa2
KC specific, Age reduced	GO:0006816	calcium ion transport	'15/336	394/20565	0.00222006	0.0329731	0.0263908	15	Ngf/Stc1/Atp2b4/F2r/Gja1/Pawr/Itgb3/Hes1/Ctgf/Slc24a5/Ddit3/Dmd/Cacnb3/Chd7/Cxcl10
KC specific, Age reduced	GO:0032872	regulation of stress-activated MAPK cascade	'10/336	207/20565	0.00222754	0.0329731	0.0263908	10	Arhgef5/Gstp1/Map3k20/Fzd4/Ctgf/Dab2ip/Gadd45g/Magi3/Eda2r/Mecom
KC specific, Age reduced	GO:0061448	connective tissue development	'11/336	243/20565	0.00227814	0.0335839	0.0268797	11	Loxl2/Stc1/Hmga2/Cyr61/Bmp6/Serpinh1/Id4/Itgb3/Ctgf/Csgalnact1/Nfib
KC specific, Age reduced	GO:0070302	regulation of stress-activated protein kinase signaling cascade	'10/336	208/20565	0.00230703	0.0336511	0.0269335	10	Arhgef5/Gstp1/Map3k20/Fzd4/Ctgf/Dab2ip/Gadd45g/Magi3/Eda2r/Mecom
KC specific, Age reduced	GO:0043405	regulation of MAP kinase activity	'12/336	280/20565	0.00230868	0.0336511	0.0269335	12	F2r/Arhgef5/Gstp1/Map3k20/Fzd4/Erbb2/Dab2ip/Flt1/Kitl/Gadd45g/Magi3/Ghr
KC specific, Age reduced	GO:0048771	tissue remodeling	'9/336	174/20565	0.00231076	0.0336511	0.0269335	9	Tgfbr3/F2r/Gja1/Ahr/Itgb3/Lepr/Chd7/Pdk4/Epas1
KC specific, Age reduced	GO:0048017	inositol lipid-mediated signaling	'8/336	142/20565	0.00236003	0.0339653	0.027185	8	F2r/Prex2/Erbb2/Dab2ip/Pdgfra/Flt1/Tek/Prr5l
KC specific, Age reduced	GO:0032233	positive regulation of actin filament bundle assembly	'5/336	57/20565	0.00236067	0.0339653	0.027185	5	Arhgef5/Ctgf/Prkcq/Tpm1/Arhgef10
KC specific, Age reduced	GO:0070527	platelet aggregation	'5/336	57/20565	0.00236067	0.0339653	0.027185	5	Itga2b/Itgb3/Csrp1/Prkcq/Pdgfra
KC specific, Age reduced	GO:0001649	osteoblast differentiation	'10/336	209/20565	0.00238878	0.0342329	0.0273991	10	Tgfbr3/Cyr61/Bmp6/Gja1/Id4/Gabbr1/Pdlim7/Fgf23/Creb3l1/Hdac7
KC specific, Age reduced	GO:0060441	epithelial tube branching involved in lung morphogenesis	'4/336	35/20565	0.00245764	0.0348417	0.0278864	4	Hmga2/Dlg5/Yap1/Pdgfra
KC specific, Age reduced	GO:0050807	regulation of synapse organization	'8/336	143/20565	0.00246524	0.0348417	0.0278864	8	Nedd4/Dlg5/Dbn1/Pdlim5/Dmpk/Dab2ip/Adgrl1/Amigo2
KC specific, Age reduced	GO:0010001	glial cell differentiation	'10/336	210/20565	0.00247285	0.0348417	0.0278864	10	Hmga2/Afdn/Id4/Lamb2/Tal1/Hes1/Erbb2/Dmd/Arhgef10/Nfib
KC specific, Age reduced	GO:0048368	lateral mesoderm development	'3/336	17/20565	0.0024797	0.0348417	0.0278864	3	Tead2/Yap1/Tead1
KC specific, Age reduced	GO:0072234	metanephric nephron tubule development	'3/336	17/20565	0.0024797	0.0348417	0.0278864	3	Aqp1/Hes1/Yap1
KC specific, Age reduced	GO:0010633	negative regulation of epithelial cell migration	'5/336	58/20565	0.00254939	0.0356816	0.0285586	5	Stc1/Tgfbr3/Dab2ip/Ptprg/Nr2f2
KC specific, Age reduced	GO:0001892	embryonic placenta development	'7/336	113/20565	0.00257182	0.035856	0.0286982	7	Cyr61/Krt8/Adm/Hes1/Vcam1/Epas1/Nr2f2
KC specific, Age reduced	GO:1902905	positive regulation of supramolecular fiber organization	'9/336	177/20565	0.00259289	0.0358736	0.0287123	9	Cttn/Nckap1/Arhgef5/Ctgf/Map1b/Prkcq/Cdc42ep1/Tpm1/Arhgef10
KC specific, Age reduced	GO:0042063	gliogenesis	'12/336	284/20565	0.00259303	0.0358736	0.0287123	12	Hmga2/Afdn/Id4/Lamb2/Tal1/Hes1/Erbb2/Cdkn2b/Dab2ip/Dmd/Arhgef10/Nfib
KC specific, Age reduced	GO:0060041	retina development in camera-type eye	'8/336	145/20565	0.00268665	0.0366838	0.0293607	8	Nectin3/Rhoj/Lamb2/Fzd4/Pdgfra/Col4a1/Chd7/Tspan12
KC specific, Age reduced	GO:0016331	morphogenesis of embryonic epithelium	'9/336	178/20565	0.00269277	0.0366838	0.0293607	9	Prickle1/Nckap1/Adm/Tead2/Tgfb1i1/Cecr2/Dlc1/Lama5/Tulp3
KC specific, Age reduced	GO:0001656	metanephros development	'6/336	85/20565	0.00269553	0.0366838	0.0293607	6	Aqp1/Lamb2/Dlg5/Hes1/Yap1/Pdgfra
KC specific, Age reduced	GO:0010811	positive regulation of cell-substrate adhesion	'7/336	114/20565	0.00270258	0.0366838	0.0293607	7	Ccdc80/Cyr61/Dbn1/Itgb3/Net1/Dmd/Tek
KC specific, Age reduced	GO:0014020	primary neural tube formation	'7/336	114/20565	0.00270258	0.0366838	0.0293607	7	Prickle1/Nckap1/Adm/Tead2/Cecr2/Dlc1/Tulp3
KC specific, Age reduced	GO:0031334	positive regulation of protein complex assembly	'10/336	213/20565	0.00273937	0.0370433	0.0296486	10	Ide/Cttn/Nckap1/Ahr/Arhgef5/Fscn1/Tal1/Map1b/Palld/Cdc42ep1
KC specific, Age reduced	GO:0051924	regulation of calcium ion transport	'11/336	250/20565	0.00283555	0.0382003	0.0305745	11	Ngf/Stc1/F2r/Gja1/Pawr/Itgb3/Hes1/Dmd/Cacnb3/Chd7/Cxcl10
KC specific, Age reduced	GO:0016525	negative regulation of angiogenesis	'6/336	86/20565	0.00285871	0.038226	0.0305951	6	Cd59a/Sparc/Dab2ip/Tie1/Tek/Cxcl10
KC specific, Age reduced	GO:0043506	regulation of JUN kinase activity	'6/336	86/20565	0.00285871	0.038226	0.0305951	6	Arhgef5/Gstp1/Map3k20/Fzd4/Dab2ip/Magi3
KC specific, Age reduced	GO:0032874	positive regulation of stress-activated MAPK cascade	'8/336	147/20565	0.00292331	0.0387078	0.0309807	8	Arhgef5/Map3k20/Fzd4/Ctgf/Dab2ip/Gadd45g/Magi3/Eda2r
KC specific, Age reduced	GO:0003094	glomerular filtration	'3/336	18/20565	0.00293989	0.0387078	0.0309807	3	F2r/Aqp1/Gja1
KC specific, Age reduced	GO:0060123	regulation of growth hormone secretion	'3/336	18/20565	0.00293989	0.0387078	0.0309807	3	Hmga2/Gabbr1/Chd7
KC specific, Age reduced	GO:0071801	regulation of podosome assembly	'3/336	18/20565	0.00293989	0.0387078	0.0309807	3	Arhgef5/Fscn1/Palld
KC specific, Age reduced	GO:0032623	interleukin-2 production	'5/336	60/20565	0.00295931	0.0387078	0.0309807	5	Pawr/Vsig4/Sptbn1/Prkcq/Hdac7
KC specific, Age reduced	GO:0070059	intrinsic apoptotic signaling pathway in response to endoplasmic reticulum stress	'5/336	60/20565	0.00295931	0.0387078	0.0309807	5	Ddit3/Dab2ip/Bok/Pmaip1/Creb3l1
KC specific, Age reduced	GO:0048675	axon extension	'7/336	116/20565	0.00297937	0.0388289	0.0310777	7	Cttn/Ngf/Lamb2/Dbn1/Map1b/Tnfrsf12a/Ifrd1
KC specific, Age reduced	GO:0008217	regulation of blood pressure	'9/336	181/20565	0.0030108	0.0388727	0.0311127	9	Ednrb/F2r/Adm/Gja1/Ahr/Ddah1/Ece1/Tpm1/Nr2f2
KC specific, Age reduced	GO:0030513	positive regulation of BMP signaling pathway	'4/336	37/20565	0.00302172	0.0388727	0.0311127	4	Tgfbr3/Cyr61/Neo1/Hes1
KC specific, Age reduced	GO:0090092	regulation of transmembrane receptor protein serine/threonine kinase signaling pathway	'10/336	216/20565	0.00302841	0.0388727	0.0311127	10	Htra1/Tgfbr3/Cyr61/Neo1/Bmp6/Inhbb/Hes1/Tgfb1i1/Cdkn2b/Gdf15
KC specific, Age reduced	GO:0014066	regulation of phosphatidylinositol 3-kinase signaling	'6/336	87/20565	0.00302918	0.0388727	0.0311127	6	F2r/Erbb2/Dab2ip/Flt1/Tek/Prr5l
KC specific, Age reduced	GO:0007179	transforming growth factor beta receptor signaling pathway	'8/336	148/20565	0.00304757	0.0388727	0.0311127	8	Htra1/Tgfbr3/Ptprk/Cldn5/Tgfb1i1/Fermt2/Cdkn2b/Cdh5
KC specific, Age reduced	GO:0070304	positive regulation of stress-activated protein kinase signaling cascade	'8/336	148/20565	0.00304757	0.0388727	0.0311127	8	Arhgef5/Map3k20/Fzd4/Ctgf/Dab2ip/Gadd45g/Magi3/Eda2r
KC specific, Age reduced	GO:0014065	phosphatidylinositol 3-kinase signaling	'7/336	117/20565	0.00312564	0.0397277	0.031797	7	F2r/Prex2/Erbb2/Dab2ip/Flt1/Tek/Prr5l
KC specific, Age reduced	GO:0006937	regulation of muscle contraction	'8/336	149/20565	0.0031759	0.04015	0.032135	8	Cttn/Stc1/F2r/Pawr/Dbn1/Ctgf/Dmpk/Dmd
KC specific, Age reduced	GO:0001885	endothelial cell development	'5/336	61/20565	0.00318119	0.04015	0.032135	5	Stc1/Afdn/Cldn5/Dmd/Cdh5
KC specific, Age reduced	GO:0050803	regulation of synapse structure or activity	'8/336	150/20565	0.0033084	0.0415006	0.0332161	8	Nedd4/Dlg5/Dbn1/Pdlim5/Dmpk/Dab2ip/Adgrl1/Amigo2
KC specific, Age reduced	GO:0035924	cellular response to vascular endothelial growth factor stimulus	'4/336	38/20565	0.00333436	0.0415006	0.0332161	4	Dab2ip/Jcad/Pdgfra/Flt1
KC specific, Age reduced	GO:0072210	metanephric nephron development	'4/336	38/20565	0.00333436	0.0415006	0.0332161	4	Aqp1/Lamb2/Hes1/Pdgfra
KC specific, Age reduced	GO:0098801	regulation of renal system process	'4/336	38/20565	0.00333436	0.0415006	0.0332161	4	Ednrb/Stc1/F2r/Gja1
KC specific, Age reduced	GO:0045445	myoblast differentiation	'6/336	89/20565	0.00339275	0.0419372	0.0335655	6	Prickle1/Mbnl3/Ddit3/Cxcl10/Ankrd1/Epas1
KC specific, Age reduced	GO:2000181	negative regulation of blood vessel morphogenesis	'6/336	89/20565	0.00339275	0.0419372	0.0335655	6	Cd59a/Sparc/Dab2ip/Tie1/Tek/Cxcl10
KC specific, Age reduced	GO:1903725	regulation of phospholipid metabolic process	'5/336	62/20565	0.00341481	0.0420653	0.033668	5	Dab2ip/Pdgfra/Flt1/Tek/Adgrf5
KC specific, Age reduced	GO:0097205	renal filtration	'3/336	19/20565	0.00344923	0.0423443	0.0338913	3	F2r/Aqp1/Gja1
KC specific, Age reduced	GO:0042552	myelination	'7/336	120/20565	0.00359754	0.0440148	0.0352283	7	Epb41l3/Mpdz/Id4/Jam3/Cldn5/Erbb2/Arhgef10
KC specific, Age reduced	GO:0032965	regulation of collagen biosynthetic process	'4/336	39/20565	0.0036683	0.0447284	0.0357995	4	F2r/Cyp2j6/Ctgf/Creb3l1
KC specific, Age reduced	GO:0045667	regulation of osteoblast differentiation	'7/336	121/20565	0.0037663	0.0457681	0.0366316	7	Cyr61/Bmp6/Gja1/Id4/Pdlim7/Fgf23/Hdac7
KC specific, Age reduced	GO:0010769	regulation of cell morphogenesis involved in differentiation	'12/336	298/20565	0.00382101	0.0462767	0.0370387	12	Cttn/Ngf/Nedd4/Bcar1/Dbn1/Itgb3/Syne1/Net1/Pdlim5/Map1b/Tnfrsf12a/Ifrd1
KC specific, Age reduced	GO:0014068	positive regulation of phosphatidylinositol 3-kinase signaling	'5/336	64/20565	0.00391862	0.0467847	0.0374453	5	F2r/Erbb2/Flt1/Tek/Prr5l
KC specific, Age reduced	GO:0060425	lung morphogenesis	'5/336	64/20565	0.00391862	0.0467847	0.0374453	5	Hmga2/Dlg5/Yap1/Pdgfra/Nfib
KC specific, Age reduced	GO:0009914	hormone transport	'13/336	338/20565	0.0039201	0.0467847	0.0374453	13	Hmga2/Aqp1/Adm/Bmp6/Gja1/Ica1/Inhbb/Gabbr1/Lepr/Fzd4/Abcb1a/Chd7/Fgf23
KC specific, Age reduced	GO:0045862	positive regulation of proteolysis	'12/336	299/20565	0.0039241	0.0467847	0.0374453	12	Cyr61/F2r/Prickle1/Pawr/Ctgf/Sh3d19/Dab2ip/Rnf217/Dlc1/Bok/Pmaip1/Rnf125
KC specific, Age reduced	GO:0007272	ensheathment of neurons	'7/336	122/20565	0.003941	0.0467847	0.0374453	7	Epb41l3/Mpdz/Id4/Jam3/Cldn5/Erbb2/Arhgef10
KC specific, Age reduced	GO:0008366	axon ensheathment	'7/336	122/20565	0.003941	0.0467847	0.0374453	7	Epb41l3/Mpdz/Id4/Jam3/Cldn5/Erbb2/Arhgef10
KC specific, Age reduced	GO:0030168	platelet activation	'6/336	92/20565	0.00399771	0.0469972	0.0376153	6	F2r/Itga2b/Itgb3/Csrp1/Prkcq/Pdgfra
KC specific, Age reduced	GO:0072170	metanephric tubule development	'3/336	20/20565	0.00400926	0.0469972	0.0376153	3	Aqp1/Hes1/Yap1
KC specific, Age reduced	GO:0006182	cGMP biosynthetic process	'4/336	40/20565	0.00402422	0.0469972	0.0376153	4	Adcy6/Aqp1/Npr2/Adcy4
KC specific, Age reduced	GO:0010518	positive regulation of phospholipase activity	'4/336	40/20565	0.00402422	0.0469972	0.0376153	4	Cyr61/Pdgfra/Flt1/Dlc1
KC specific, Age reduced	GO:0043551	regulation of phosphatidylinositol 3-kinase activity	'4/336	40/20565	0.00402422	0.0469972	0.0376153	4	Dab2ip/Pdgfra/Flt1/Tek
KC specific, Age reduced	GO:0070663	regulation of leukocyte proliferation	'10/336	225/20565	0.00404395	0.0470747	0.0376774	10	Ahr/Dlg5/Pawr/Vsig4/Gstp1/Hes1/Vcam1/Prkcq/Erbb2/Kitl
KC specific, Age reduced	GO:2001056	positive regulation of cysteine-type endopeptidase activity	'7/336	123/20565	0.00412178	0.047826	0.0382787	7	Cyr61/F2r/Pawr/Ctgf/Dlc1/Bok/Pmaip1
KC specific, Age reduced	GO:0003143	embryonic heart tube morphogenesis	'5/336	65/20565	0.0041895	0.0483001	0.0386582	5	Gja1/Tead2/Hes1/Yap1/Tead1
KC specific, Age reduced	GO:0045669	positive regulation of osteoblast differentiation	'5/336	65/20565	0.0041895	0.0483001	0.0386582	5	Cyr61/Bmp6/Gja1/Id4/Pdlim7
KC specific, Age reduced	GO:0030516	regulation of axon extension	'6/336	93/20565	0.00421606	0.0484511	0.038779	6	Cttn/Ngf/Dbn1/Map1b/Tnfrsf12a/Ifrd1
KC specific, Age reduced	GO:0055076	transition metal ion homeostasis	'7/336	124/20565	0.00430878	0.0493588	0.0395056	7	Steap1/Steap2/Heph/Neo1/Bmp6/Sfxn1/Epas1
MG specific, Age induced	GO:0032663	regulation of interleukin-2 production	'4/87	55/20565	8.64333e-05	0.0480354	0.0457845	4	Havcr2/Nav3/Lag3/Cd83
MG specific, Age induced	GO:0032703	negative regulation of interleukin-2 production	'3/87	22/20565	0.000106256	0.0480354	0.0457845	3	Havcr2/Nav3/Lag3
MG specific, Age induced	GO:0032623	interleukin-2 production	'4/87	60/20565	0.000121609	0.0480354	0.0457845	4	Havcr2/Nav3/Lag3/Cd83
MG specific, Age reduced	GO:0044782	cilium organization	'41/689	297/20565	1.33966e-14	3.33642e-11	2.67019e-11	41	Spag6l/Drc1/Foxj1/Iqub/Rsph1/Dzip1l/Kif27/Rsph4a/Ccdc39/Cfap126/Klc3/Mns1/Tmem231/Eno4/Ablim1/Dync2li1/Ccdc113/Tekt1/Iqcg/Nme5/Dnal1/Ift80/Spef2/Ccdc114/Wdr35/Rsph9/B9d1/Ulk4/Dnaic1/Ccdc65/Gmnc/Zic2/Ttc26/Ttll5/Ift74/Bbs1/Arl6/Rpgr/Ift81/Ttc8/Stk36
MG specific, Age reduced	GO:0120031	plasma membrane bounded cell projection assembly	'52/689	460/20565	1.61726e-14	3.33642e-11	2.67019e-11	52	Gpm6a/Spag6l/Drc1/Foxj1/Iqub/Rsph1/Tgfb3/Dzip1l/Emp2/Kif27/Rsph4a/Kank1/Ccdc39/Stk26/Mns1/Tmem231/Ajuba/Myh10/Arhgef26/Fgd1/Ablim1/Dync2li1/Ccdc113/Tekt1/Iqcg/Nme5/Dnal1/Slit2/Ift80/Spef2/Ccdc114/Pfn2/Wdr35/Rsph9/B9d1/Ulk4/Cobl/Dnaic1/Eps8l2/Ccdc65/Ezr/Gmnc/Ttc26/Ttll5/Ift74/Bbs1/Arl6/Rpgr/Ift81/Ttc8/Gm14137/Stk36
MG specific, Age reduced	GO:0030031	cell projection assembly	'52/689	467/20565	2.98374e-14	4.10364e-11	3.28421e-11	52	Gpm6a/Spag6l/Drc1/Foxj1/Iqub/Rsph1/Tgfb3/Dzip1l/Emp2/Kif27/Rsph4a/Kank1/Ccdc39/Stk26/Mns1/Tmem231/Ajuba/Myh10/Arhgef26/Fgd1/Ablim1/Dync2li1/Ccdc113/Tekt1/Iqcg/Nme5/Dnal1/Slit2/Ift80/Spef2/Ccdc114/Pfn2/Wdr35/Rsph9/B9d1/Ulk4/Cobl/Dnaic1/Eps8l2/Ccdc65/Ezr/Gmnc/Ttc26/Ttll5/Ift74/Bbs1/Arl6/Rpgr/Ift81/Ttc8/Gm14137/Stk36
MG specific, Age reduced	GO:0060271	cilium assembly	'37/689	277/20565	7.44174e-13	7.67616e-10	6.14335e-10	37	Spag6l/Drc1/Foxj1/Iqub/Rsph1/Dzip1l/Kif27/Rsph4a/Ccdc39/Mns1/Tmem231/Ablim1/Dync2li1/Ccdc113/Tekt1/Iqcg/Nme5/Dnal1/Ift80/Spef2/Ccdc114/Wdr35/Rsph9/B9d1/Ulk4/Dnaic1/Ccdc65/Gmnc/Ttc26/Ttll5/Ift74/Bbs1/Arl6/Rpgr/Ift81/Ttc8/Stk36
MG specific, Age reduced	GO:0061564	axon development	'45/689	451/20565	7.15229e-11	5.90207e-08	4.72352e-08	45	Smo/Folr1/Bdnf/Matn2/Plxnb1/Map2/Ncam1/Ndn/Dclk1/Tnc/Snap91/Enah/Nrn1/Otx2/Lmx1a/Rtn4rl1/Cdh2/Myh10/Ablim1/Brsk1/Lgi1/Wnt5a/Ntrk2/Fgfr2/Plppr4/Lrrn2/Slit2/Myo5b/Dixdc1/Ddr1/Nfasc/Cobl/Fzd3/Mgll/Ccr5/Zic2/Cdkl5/Gas1/Kif5c/Tubb2b/Ptprf/Apbb1/Ttc8/Crabp2/Chn1
MG specific, Age reduced	GO:0030900	forebrain development	'36/689	355/20565	3.8346e-09	2.63693e-06	2.11038e-06	36	Bmpr1a/Smo/Tyro3/Ccdc141/Ncam1/Dclk1/Lrp2/Emx2/Efhc1/Otx2/Cntnap2/Cdon/Lamb1/Lmx1a/Rtn4rl1/Wnt2b/Cdh2/Myh10/Wnt5a/Ntrk2/Slc4a10/Fgfr2/Msx1/Kif1a/Slit2/Aplp1/Dixdc1/Tmem108/Ulk4/Bmp4/Mfsd2a/Aldh1a3/Lrp8/Bbs1/Fgf2/Ttc8
MG specific, Age reduced	GO:0007018	microtubule-based movement	'29/689	247/20565	4.84938e-09	2.85836e-06	2.28759e-06	29	Kif27/Rsph4a/Ccdc39/Klc3/Dynlrb2/Dync2li1/Tekt1/Nme5/Kif1a/Kif21a/Ift80/Spef2/Ccdc114/Bicd1/Wdr78/Wdr35/Rsph9/Tmem108/Ulk4/Dnaic1/Ccdc65/Kif5c/Ttc26/Ift74/Bbs1/Rpgr/Ift81/Kif9/Stk36
MG specific, Age reduced	GO:0007409	axonogenesis	'39/689	421/20565	1.09929e-08	5.66961e-06	4.53748e-06	39	Smo/Bdnf/Matn2/Plxnb1/Map2/Ndn/Dclk1/Snap91/Enah/Nrn1/Otx2/Lmx1a/Cdh2/Myh10/Ablim1/Brsk1/Lgi1/Wnt5a/Ntrk2/Fgfr2/Plppr4/Lrrn2/Slit2/Myo5b/Dixdc1/Nfasc/Cobl/Fzd3/Mgll/Ccr5/Zic2/Cdkl5/Gas1/Kif5c/Tubb2b/Apbb1/Ttc8/Crabp2/Chn1
MG specific, Age reduced	GO:0003341	cilium movement	'14/689	70/20565	6.70797e-08	3.07523e-05	2.46116e-05	14	Kif27/Rsph4a/Ccdc39/Tekt1/Nme5/Spef2/Ccdc114/Wdr78/Rsph9/Ulk4/Dnaic1/Ccdc65/Bbs1/Stk36
MG specific, Age reduced	GO:0030198	extracellular matrix organization	'24/689	207/20565	1.3008e-07	4.19948e-05	3.36091e-05	24	Spint2/Col5a2/Sulf1/Eln/Ddr2/Tnfrsf11b/Col4a3/P3h4/Mia/Lox/Crispld2/Aplp1/Smoc1/Fbln5/Col5a1/Ddr1/Has2/Scx/Lamc2/Pdpn/Mmp11/Apbb1/Kif9/Reck
MG specific, Age reduced	GO:0060560	developmental growth involved in morphogenesis	'26/689	238/20565	1.30652e-07	4.19948e-05	3.36091e-05	26	Smo/Bdnf/Sfrp1/Plxnb1/Ndn/Dclk1/Tnc/Nrn1/Rdh10/Slc12a2/Wnt5a/Ptk7/Fgfr2/Slit2/Myo5b/Tmem108/Ddr1/Cobl/Six4/Syt17/Pthlh/Mgll/Ccr5/Bmp4/Cdkl5/Crabp2
MG specific, Age reduced	GO:0090596	sensory organ morphogenesis	'29/689	287/20565	1.36472e-07	4.19948e-05	3.36091e-05	29	Col5a2/Bdnf/Mfrp/Cthrc1/Prrx1/Fzd6/Col8a1/Col8a2/Otx2/Cdon/Wnt5a/Ntrk2/Ptk7/Fgfr2/Msx1/Megf11/Lrig1/Gdf11/Col5a1/Six4/Fat1/Fzd3/Bmp4/Aldh1a3/Gas1/Arl6/Rpgr/Fgf2/Ttc8
MG specific, Age reduced	GO:0016331	morphogenesis of embryonic epithelium	'22/689	178/20565	1.40263e-07	4.19948e-05	3.36091e-05	22	Spint2/Folr1/Sulf1/Sfrp1/Cthrc1/Fzd6/Lrp2/Enah/Vegfc/Wnt2b/Rdh10/Wnt5a/Ptk7/Fgfr2/Llgl2/Cobl/Six4/Fzd3/Bmp4/Aldh1a3/Zic2/Shroom3
MG specific, Age reduced	GO:0043062	extracellular structure organization	'24/689	208/20565	1.42493e-07	4.19948e-05	3.36091e-05	24	Spint2/Col5a2/Sulf1/Eln/Ddr2/Tnfrsf11b/Col4a3/P3h4/Mia/Lox/Crispld2/Aplp1/Smoc1/Fbln5/Col5a1/Ddr1/Has2/Scx/Lamc2/Pdpn/Mmp11/Apbb1/Kif9/Reck
MG specific, Age reduced	GO:0090287	regulation of cellular response to growth factor stimulus	'26/689	250/20565	3.4516e-07	8.30066e-05	6.64316e-05	26	Folr1/Sulf1/Sfrp1/Lrp2/Fbn1/Fstl3/Tgfb3/Vegfc/Dcn/Nrep/Wnt5a/Rasl11b/Fgfr2/Msx1/Slit2/Crb2/Fgfrl1/Tmem108/Itga3/Prdm16/Peg10/Vasn/Bmp4/Msx2/Ptprf/Fgf2
MG specific, Age reduced	GO:1905114	cell surface receptor signaling pathway involved in cell-cell signaling	'38/689	461/20565	3.52239e-07	8.30066e-05	6.64316e-05	38	Smo/Folr1/Sulf1/Bdnf/Sfrp1/Cthrc1/Fzd6/Wisp1/Abat/Kank1/Nxn/Lmx1a/Cx3cl1/Wnt2b/Cdh2/Cdh3/Wnt5a/Ptk7/Fgfr2/Mark1/Adora1/Ndrg2/Ift80/Mpp2/Amer2/Lgr4/Dixdc1/Tmem108/Ptpru/Ins2/Itga3/Fzd3/Dlg4/Unc13b/Bmp4/Snca/Arl6/Fgf2
MG specific, Age reduced	GO:0022604	regulation of cell morphogenesis	'38/689	462/20565	3.71868e-07	8.30066e-05	6.64316e-05	38	Enpp2/Bdnf/Plxnb1/Map2/Strip2/Kank1/Sdc2/Id1/Cdh2/Myh10/Arhgap44/Fgd1/Bhlhb9/Wnt5a/Ntrk2/Slit2/Itga7/Myo5b/Akap5/Dixdc1/Ptprd/Has2/Palmd/Syt17/Mgll/Arhgef18/Ccr5/Ezr/Arc/Cdkl5/Pdpn/Tubb2b/Lrp8/Ptprf/Gm14137/Shroom3/Crabp2/Chn1
MG specific, Age reduced	GO:0007224	smoothened signaling pathway	'18/689	131/20565	3.91863e-07	8.30066e-05	6.64316e-05	18	Smo/Iqub/Sfrp1/Prrx1/Scube3/Cdon/Evc2/Tmem231/Fgfr2/Zic1/Ift80/B9d1/Evc/Gas1/Ttc26/Arl6/Stk36/Glis2
MG specific, Age reduced	GO:0098840	protein transport along microtubule	'11/689	48/20565	4.02359e-07	8.30066e-05	6.64316e-05	11	Klc3/Dync2li1/Kif1a/Ift80/Wdr35/Kif5c/Ttc26/Ift74/Bbs1/Rpgr/Ift81
MG specific, Age reduced	GO:0099118	microtubule-based protein transport	'11/689	48/20565	4.02359e-07	8.30066e-05	6.64316e-05	11	Klc3/Dync2li1/Kif1a/Ift80/Wdr35/Kif5c/Ttc26/Ift74/Bbs1/Rpgr/Ift81
MG specific, Age reduced	GO:0001654	eye development	'32/689	359/20565	5.45459e-07	0.00010717	8.57697e-05	32	Col5a2/Gpm6a/Bdnf/Mfrp/Col8a1/Col8a2/Otx2/Cdon/Tmem231/Myh10/Rdh10/Ntrk2/Fgfr2/Megf11/Smarcd3/Smoc1/Gdf11/Slc4a5/B9d1/Col5a1/Fat1/Sall2/Bmp4/Aldh1a3/Cryab/Gas1/Ttll5/Arl6/Rpgr/Fgf2/Nphp1/Ttc8
MG specific, Age reduced	GO:0045216	cell-cell junction organization	'22/689	193/20565	5.79408e-07	0.000108665	8.69667e-05	22	Enpp2/Lsr/Perp/Cxadr/Ace2/Tgfb3/Dsg2/Plekha7/Gjb2/Ajuba/Dsp/Ocln/Cldn1/Nfasc/Pard3/Crb3/Ace/Pkp2/Cgn/Jup/Cldn3/Nphp1
MG specific, Age reduced	GO:0035082	axoneme assembly	'12/689	62/20565	8.45697e-07	0.000151711	0.000121417	12	Spag6l/Drc1/Rsph1/Rsph4a/Ccdc39/Iqcg/Dnal1/Spef2/Ccdc114/Rsph9/Dnaic1/Ttll5
MG specific, Age reduced	GO:0010769	regulation of cell morphogenesis involved in differentiation	'28/689	298/20565	9.83349e-07	0.000169054	0.000135297	28	Enpp2/Bdnf/Plxnb1/Map2/Kank1/Sdc2/Id1/Cdh2/Arhgap44/Bhlhb9/Wnt5a/Ntrk2/Slit2/Myo5b/Akap5/Dixdc1/Ptprd/Has2/Mgll/Ccr5/Arc/Cdkl5/Pdpn/Tubb2b/Lrp8/Ptprf/Crabp2/Chn1
MG specific, Age reduced	GO:0060572	morphogenesis of an epithelial bud	'7/689	18/20565	1.0596e-06	0.000174877	0.000139957	7	Sulf1/Wnt2b/Rdh10/Wnt5a/Fgfr2/Pthlh/Bmp4
MG specific, Age reduced	GO:0030048	actin filament-based movement	'15/689	100/20565	1.16751e-06	0.000185275	0.000148279	15	Acta2/Fxyd1/Emp2/Dsg2/Mylk2/Myh10/Cacna2d1/Atp1a2/Dsp/Pard3/Kcnh2/Pkp2/Jup/Pdpn/Apbb1
MG specific, Age reduced	GO:0061351	neural precursor cell proliferation	'20/689	171/20565	1.24969e-06	0.000190972	0.000152838	20	Smo/Spint2/Bdnf/Fzd6/Lrp2/Emx2/Vegfc/Cdon/Cx3cl1/Cdh2/Wnt5a/Fgfr2/Kif1a/Smarcd3/Dixdc1/Acsl6/Fzd3/Ccr5/Bbs1/Fgf2
MG specific, Age reduced	GO:0031346	positive regulation of cell projection organization	'34/689	414/20565	1.58284e-06	0.000233243	0.000186669	34	Enpp2/Gpm6a/Cntn1/Bdnf/Vldlr/Plxnb1/Efemp1/Tgfb3/Mns1/Cx3cl1/Bhlhb9/Wnt5a/Ntrk2/Lcn2/Ptk7/Myo5b/Akap5/Dixdc1/Ptprd/Ins2/Cobl/Il1rap/Acsl6/Eps8l2/Itga3/Syt17/Bmp4/Cdkl5/Tubb2b/Lrp8/Ptprf/Apbb1/Gm14137/Crabp2
MG specific, Age reduced	GO:0001578	microtubule bundle formation	'14/689	90/20565	1.69117e-06	0.000237633	0.000190181	14	Spag6l/Drc1/Map2/Rsph1/Rsph4a/Ccdc39/Iqcg/Dnal1/Spef2/Ccdc114/Rsph9/Dnaic1/Ttll5/Tppp3
MG specific, Age reduced	GO:0007043	cell-cell junction assembly	'13/689	78/20565	1.7776e-06	0.000237633	0.000190181	13	Lsr/Ace2/Gjb2/Ocln/Cldn1/Nfasc/Pard3/Ace/Pkp2/Cgn/Jup/Cldn3/Nphp1
MG specific, Age reduced	GO:0035088	establishment or maintenance of apical/basal cell polarity	'10/689	45/20565	1.84301e-06	0.000237633	0.000190181	10	Foxj1/Ooep/Dlg3/Wnt5a/Ptk7/Crb2/Crb3/Fat1/Dlg4/Ezr
MG specific, Age reduced	GO:0061245	establishment or maintenance of bipolar cell polarity	'10/689	45/20565	1.84301e-06	0.000237633	0.000190181	10	Foxj1/Ooep/Dlg3/Wnt5a/Ptk7/Crb2/Crb3/Fat1/Dlg4/Ezr
MG specific, Age reduced	GO:0070252	actin-mediated cell contraction	'13/689	79/20565	2.06333e-06	0.000257978	0.000206464	13	Acta2/Fxyd1/Emp2/Dsg2/Mylk2/Cacna2d1/Atp1a2/Dsp/Pard3/Kcnh2/Pkp2/Jup/Pdpn
MG specific, Age reduced	GO:0021537	telencephalon development	'23/689	225/20565	2.18897e-06	0.000265638	0.000212595	23	Smo/Ccdc141/Emx2/Efhc1/Otx2/Cdon/Lamb1/Lmx1a/Rtn4rl1/Cdh2/Myh10/Wnt5a/Ntrk2/Slit2/Dixdc1/Tmem108/Ulk4/Bmp4/Mfsd2a/Aldh1a3/Lrp8/Bbs1/Ttc8
MG specific, Age reduced	GO:0003351	epithelial cilium movement	'7/689	20/20565	2.43415e-06	0.000286952	0.000229652	7	Kif27/Ccdc39/Nme5/Spef2/Ulk4/Dnaic1/Stk36
MG specific, Age reduced	GO:0034330	cell junction organization	'22/689	212/20565	2.82811e-06	0.000323314	0.000258753	22	Enpp2/Lsr/Perp/Cxadr/Ace2/Tgfb3/Dsg2/Plekha7/Gjb2/Ajuba/Dsp/Ocln/Cldn1/Nfasc/Pard3/Crb3/Ace/Pkp2/Cgn/Jup/Cldn3/Nphp1
MG specific, Age reduced	GO:0048592	eye morphogenesis	'19/689	165/20565	2.89932e-06	0.000323314	0.000258753	19	Col5a2/Bdnf/Mfrp/Col8a1/Col8a2/Otx2/Cdon/Ntrk2/Megf11/Gdf11/Col5a1/Fat1/Bmp4/Aldh1a3/Gas1/Arl6/Rpgr/Fgf2/Ttc8
MG specific, Age reduced	GO:0045995	regulation of embryonic development	'16/689	122/20565	3.21463e-06	0.000349041	0.000279343	16	Bmpr1a/Col5a2/Sulf1/Sfrp1/Otx2/Wnt2b/Amot/Wnt5a/Ptk7/Crb2/Col5a1/Scx/Six4/Fzd3/Bmp4/Tenm4
MG specific, Age reduced	GO:0050808	synapse organization	'26/689	284/20565	3.84903e-06	0.000407208	0.000325895	26	Gpm6a/Bdnf/Rab39b/Tnc/Col4a5/Lmx1a/Cdh2/Myh10/Arhgap44/Bhlhb9/Wnt5a/Ntrk2/Fgfr2/Frmpd4/Ptprd/Pdzrn3/Dok7/Tmem108/Nfasc/Pcdhgc5/Six4/Il1rap/Dlg4/Unc13b/Snca/Shank2
MG specific, Age reduced	GO:0072001	renal system development	'26/689	285/20565	4.10427e-06	0.000423356	0.000338819	26	Smo/Sulf1/Bdnf/Sfrp1/Fras1/Pdgfd/Fbn1/Emx2/Crlf1/Col4a3/Wnt2b/Rdh10/Maged1/Wnt5a/Fgfr2/Plce1/Slit2/Gdf11/Lgr4/Six4/Ace/Itga3/Bmp4/Fgf2/Ttc8/Glis2
MG specific, Age reduced	GO:0007411	axon guidance	'20/689	185/20565	4.26212e-06	0.000428915	0.000343268	20	Smo/Bdnf/Matn2/Enah/Otx2/Lmx1a/Myh10/Ablim1/Lgi1/Wnt5a/Slit2/Nfasc/Fzd3/Zic2/Gas1/Kif5c/Tubb2b/Apbb1/Ttc8/Chn1
MG specific, Age reduced	GO:0060541	respiratory system development	'23/689	235/20565	4.57696e-06	0.000449632	0.000359848	23	Bmpr1a/Chil1/Foxj1/Tnc/Tgfb3/Ccdc39/Id1/Lox/Wnt2b/Rdh10/Wnt5a/Ptk7/Fgfr2/Spef2/Fgfrl1/Six4/Ace/Itga3/Pthlh/Bmp4/Aldh1a3/Pdpn/Fgf2
MG specific, Age reduced	GO:0097485	neuron projection guidance	'20/689	187/20565	5.02356e-06	0.000482029	0.000385775	20	Smo/Bdnf/Matn2/Enah/Otx2/Lmx1a/Myh10/Ablim1/Lgi1/Wnt5a/Slit2/Nfasc/Fzd3/Zic2/Gas1/Kif5c/Tubb2b/Apbb1/Ttc8/Chn1
MG specific, Age reduced	GO:0001655	urogenital system development	'28/689	327/20565	5.9864e-06	0.000561361	0.000449267	28	Smo/Cyp7b1/Sulf1/Bdnf/Sfrp1/Fras1/Pdgfd/Tnc/Fbn1/Emx2/Crlf1/Col4a3/Wnt2b/Rdh10/Maged1/Wnt5a/Fgfr2/Plce1/Slit2/Gdf11/Lgr4/Six4/Ace/Itga3/Bmp4/Fgf2/Ttc8/Glis2
MG specific, Age reduced	GO:0060562	epithelial tube morphogenesis	'30/689	366/20565	6.71702e-06	0.000615876	0.000492896	30	Smo/Spint2/Folr1/Sfrp1/Cthrc1/Fzd6/Lrp2/Tnc/Enah/Ccdc39/Wnt2b/Rdh10/Maged1/Slc12a2/Wnt5a/Ptk7/Fgfr2/Stard13/Slit2/Lgr4/Ddr1/Cobl/Six4/Fzd3/Pthlh/Bmp4/Msx2/Zic2/Fgf2/Shroom3
MG specific, Age reduced	GO:0035239	tube morphogenesis	'32/689	405/20565	7.14492e-06	0.000640868	0.000512897	32	Smo/Spint2/Folr1/Sfrp1/Cthrc1/Fzd6/Lrp2/Tnc/Enah/Ccdc39/Wnt2b/Rdh10/Maged1/Slc12a2/Wnt5a/Ptk7/Fgfr2/Stard13/Slit2/Lgr4/Ddr1/Cobl/Six4/Fzd3/Pthlh/Bmp4/Msx2/Zic2/Pdpn/Atoh8/Fgf2/Shroom3
MG specific, Age reduced	GO:0051271	negative regulation of cellular component movement	'24/689	259/20565	7.33221e-06	0.000643674	0.000515143	24	Bmpr1a/Spint2/Sulf1/Sfrp1/Kank1/Stk26/Cx3cl1/Angpt4/Ppargc1a/Abhd2/Dcn/Wnt5a/Stard13/Adora1/Slit2/Tcaf1/Pfn2/Srgap3/Ptpru/Ccr5/Pkp2/Frmd5/Fgf2/Reck
MG specific, Age reduced	GO:0008589	regulation of smoothened signaling pathway	'12/689	76/20565	7.91478e-06	0.000664034	0.000531437	12	Smo/Sfrp1/Prrx1/Scube3/Fgfr2/Zic1/Ift80/Evc/Gas1/Arl6/Stk36/Glis2
MG specific, Age reduced	GO:2000146	negative regulation of cell motility	'23/689	243/20565	7.98789e-06	0.000664034	0.000531437	23	Bmpr1a/Spint2/Sulf1/Sfrp1/Kank1/Stk26/Cx3cl1/Angpt4/Ppargc1a/Abhd2/Dcn/Stard13/Adora1/Slit2/Tcaf1/Pfn2/Srgap3/Ptpru/Ccr5/Pkp2/Frmd5/Fgf2/Reck
MG specific, Age reduced	GO:0040013	negative regulation of locomotion	'25/689	278/20565	8.04694e-06	0.000664034	0.000531437	25	Bmpr1a/Spint2/Sulf1/Htr2c/Sfrp1/Kank1/Stk26/Cx3cl1/Angpt4/Ppargc1a/Abhd2/Dcn/Wnt5a/Stard13/Adora1/Slit2/Tcaf1/Pfn2/Srgap3/Ptpru/Ccr5/Pkp2/Frmd5/Fgf2/Reck
MG specific, Age reduced	GO:0042073	intraciliary transport	'9/689	42/20565	8.3528e-06	0.000675758	0.00054082	9	Klc3/Dync2li1/Ift80/Wdr35/Ttc26/Ift74/Bbs1/Rpgr/Ift81
MG specific, Age reduced	GO:0008015	blood circulation	'34/689	448/20565	8.82697e-06	0.000700386	0.000560531	34	Acta2/Htr2c/Npr3/Cxadr/Ace2/Fxyd1/Abat/Emp2/Vegfc/Dsg2/Kl/Stk39/Cx3cl1/Amot/Cacna2d1/Ncald/Nppc/Atp1a2/Adora1/Slit2/Dsp/Wdr35/Slc4a5/Atp1b1/Ephx2/Pde5a/Arhgap42/Bdkrb1/Kcnh2/Ace/Mgll/Pkp2/Jup/Hey2
MG specific, Age reduced	GO:0002934	desmosome organization	'5/689	10/20565	9.11574e-06	0.000709652	0.000567946	5	Perp/Dsg2/Dsp/Pkp2/Jup
MG specific, Age reduced	GO:0007389	pattern specification process	'34/689	451/20565	1.01636e-05	0.000769112	0.000615533	34	Bmpr1a/Smo/Folr1/Drc1/Foxj1/Sfrp1/Ooep/Lrp2/Emx2/Ccdc39/Otx2/Cdon/Mns1/Wnt2b/Dync2li1/Wnt5a/Fgfr2/Msx1/Smarcd3/Zic1/Crb2/Gdf11/Cobl/Dnaic1/Bmp4/Msx2/Arc/Zic2/Gas1/Hey2/Ift74/Fgf2/Ttc8/Shroom3
MG specific, Age reduced	GO:1903115	regulation of actin filament-based movement	'9/689	43/20565	1.02523e-05	0.000769112	0.000615533	9	Acta2/Fxyd1/Dsg2/Mylk2/Atp1a2/Dsp/Pkp2/Jup/Pdpn
MG specific, Age reduced	GO:0003013	circulatory system process	'34/689	452/20565	1.06488e-05	0.00078459	0.00062792	34	Acta2/Htr2c/Npr3/Cxadr/Ace2/Fxyd1/Abat/Emp2/Vegfc/Dsg2/Kl/Stk39/Cx3cl1/Amot/Cacna2d1/Ncald/Nppc/Atp1a2/Adora1/Slit2/Dsp/Wdr35/Slc4a5/Atp1b1/Ephx2/Pde5a/Arhgap42/Bdkrb1/Kcnh2/Ace/Mgll/Pkp2/Jup/Hey2
MG specific, Age reduced	GO:0032970	regulation of actin filament-based process	'28/689	339/20565	1.17535e-05	0.000848084	0.000678735	28	Acta2/Fxyd1/Ppm1e/Eln/Nox4/Tgfb3/Ankrd23/Kank1/Dsg2/Baiap2l1/Mylk2/Id1/Arhgap44/Atp1a2/Hip1r/Slit2/Dsp/Pfn2/Dixdc1/Kirrel/Pard3/Lmod1/Pkp2/Jup/Pdpn/Plekhg2/Ttc8/Gm14137
MG specific, Age reduced	GO:0034109	homotypic cell-cell adhesion	'12/689	79/20565	1.19217e-05	0.000848084	0.000678735	12	Myl9/Tyro3/Cxadr/Ncam1/Abat/Dsg2/Dsp/Megf11/Ptpru/Pkp2/Jup/Pdpn
MG specific, Age reduced	GO:0072657	protein localization to membrane	'33/689	436/20565	1.2618e-05	0.000854183	0.000683617	33	Efcab7/Folr1/Reep2/Krt18/Emp2/Prnp/Cdh2/Arhgap44/Dlg3/Tspan33/Dusp18/Adora1/Myo5b/Tcaf1/Sytl2/Atp1b1/Plekhf1/Dok7/Ins2/Nfasc/Pard3/Itga3/Dlg4/Pkp2/Ezr/Jup/Tcaf2/Nsg1/Pls1/Cemip/Bbs1/Arl6/Ttc8
MG specific, Age reduced	GO:0045880	positive regulation of smoothened signaling pathway	'8/689	34/20565	1.27831e-05	0.000854183	0.000683617	8	Smo/Sfrp1/Prrx1/Scube3/Ift80/Evc/Gas1/Stk36
MG specific, Age reduced	GO:2000027	regulation of organ morphogenesis	'20/689	199/20565	1.27943e-05	0.000854183	0.000683617	20	Bmpr1a/Smo/Sulf1/Bdnf/Sfrp1/Cthrc1/Fzd6/Tnfrsf11b/Wnt2b/Maged1/Wnt5a/Ptk7/Fgfr2/Msx1/Lgr4/Six4/Fzd3/Bmp4/Odaph/Fgf2
MG specific, Age reduced	GO:0001501	skeletal system development	'35/689	476/20565	1.29024e-05	0.000854183	0.000683617	35	Bmpr1a/Col5a2/Sulf1/Npr3/Sfrp1/Plxnb1/Thbs3/Prrx1/Fbn1/Efemp1/Tgfb3/Rdh10/Frem1/Nppc/Wnt5a/Fgfr2/Msx1/Bmp1/Zic1/Ift80/Spef2/Gdf11/Fgfrl1/Has2/Scx/Six4/Pdgfc/Pthlh/Bmp4/Msx2/Gas1/Bbs1/Fgf2/Ttc9/Rflnb
MG specific, Age reduced	GO:0090092	regulation of transmembrane receptor protein serine/threonine kinase signaling pathway	'21/689	216/20565	1.30425e-05	0.000854183	0.000683617	21	Bmpr1a/Folr1/Sulf1/Sfrp1/Lrp2/Fbn1/Fstl3/Tgfb3/Nrep/Wnt5a/Rasl11b/Msx1/Crb2/Gdf11/Itga3/Prdm16/Peg10/Vasn/Bmp4/Msx2/Zic2
MG specific, Age reduced	GO:0001843	neural tube closure	'14/689	107/20565	1.3477e-05	0.000868843	0.000695349	14	Spint2/Folr1/Sfrp1/Cthrc1/Fzd6/Lrp2/Enah/Wnt5a/Ptk7/Cobl/Fzd3/Bmp4/Zic2/Shroom3
MG specific, Age reduced	GO:0060606	tube closure	'14/689	108/20565	1.50149e-05	0.000953102	0.000762783	14	Spint2/Folr1/Sfrp1/Cthrc1/Fzd6/Lrp2/Enah/Wnt5a/Ptk7/Cobl/Fzd3/Bmp4/Zic2/Shroom3
MG specific, Age reduced	GO:0050804	modulation of chemical synaptic transmission	'29/689	364/20565	1.63127e-05	0.00101979	0.000816153	29	Syt12/Bdnf/Htr2c/Abat/Nat8l/Gnai1/Prnp/Bace1/Mylk2/Grm8/Cdh2/Lgi1/Ntrk2/Car2/Adora1/Mpp2/Pfn2/Tmem108/Rin1/Rapgef4/Dlg4/Mgll/Plcl1/Unc13b/Snca/Arc/Shank2/Lrp8/Prepl
MG specific, Age reduced	GO:1905330	regulation of morphogenesis of an epithelium	'14/689	109/20565	1.67057e-05	0.00102877	0.000823342	14	Smo/Sulf1/Sfrp1/Cthrc1/Fzd6/Wnt2b/Maged1/Wnt5a/Ptk7/Fgfr2/Lgr4/Six4/Fzd3/Bmp4
MG specific, Age reduced	GO:0048645	animal organ formation	'11/689	69/20565	1.71468e-05	0.0010404	0.000832653	11	Bmpr1a/Folr1/Sulf1/Lrp2/Wnt2b/Rdh10/Wnt5a/Fgfr2/Smarcd3/Bmp4/Fgf2
MG specific, Age reduced	GO:0007163	establishment or maintenance of cell polarity	'19/689	188/20565	1.93588e-05	0.0011576	0.000926447	19	Spint2/Foxj1/Ooep/Map2/Snap91/Kank1/Amot/Brsk1/Dlg3/Wnt5a/Ptk7/Mark1/Llgl2/Crb2/Pard3/Crb3/Fat1/Dlg4/Ezr
MG specific, Age reduced	GO:0003401	axis elongation	'8/689	36/20565	2.00806e-05	0.00118361	0.000947262	8	Sfrp1/Tnc/Rdh10/Wnt5a/Ptk7/Fgfr2/Six4/Bmp4
MG specific, Age reduced	GO:0006836	neurotransmitter transport	'18/689	175/20565	2.51281e-05	0.00146026	0.00116867	18	Slc6a14/Syt12/Htr2c/Snap91/Nat8l/Sytl3/Grm8/Brsk1/Ntrk2/Atp1a2/Slc6a17/Slc6a20a/Pfn2/Syt17/Unc13b/Snca/Syt9/Prepl
MG specific, Age reduced	GO:0090288	negative regulation of cellular response to growth factor stimulus	'15/689	128/20565	2.56359e-05	0.00146055	0.0011689	15	Sulf1/Sfrp1/Lrp2/Fbn1/Fstl3/Tgfb3/Dcn/Wnt5a/Rasl11b/Slit2/Fgfrl1/Prdm16/Peg10/Vasn/Ptprf
MG specific, Age reduced	GO:0043583	ear development	'21/689	226/20565	2.58411e-05	0.00146055	0.0011689	21	C1qtnf5/Bdnf/Cthrc1/Prrx1/Fzd6/Otx2/Rdh10/Wnt5a/Ptk7/Fgfr2/Msx1/Plppr4/Lrig1/Ddr1/Six4/Fzd3/Bmp4/Aldh1a3/Gas1/Hey2/Ttc8
MG specific, Age reduced	GO:0014020	primary neural tube formation	'14/689	114/20565	2.79318e-05	0.00155739	0.0012464	14	Spint2/Folr1/Sfrp1/Cthrc1/Fzd6/Lrp2/Enah/Wnt5a/Ptk7/Cobl/Fzd3/Bmp4/Zic2/Shroom3
MG specific, Age reduced	GO:0001822	kidney development	'23/689	264/20565	3.03985e-05	0.00167232	0.00133839	23	Smo/Sulf1/Bdnf/Sfrp1/Fras1/Pdgfd/Fbn1/Crlf1/Col4a3/Wnt2b/Rdh10/Maged1/Fgfr2/Plce1/Slit2/Gdf11/Lgr4/Six4/Ace/Itga3/Bmp4/Fgf2/Glis2
MG specific, Age reduced	GO:0001657	ureteric bud development	'13/689	101/20565	3.24902e-05	0.00171865	0.00137546	13	Smo/Bdnf/Sfrp1/Crlf1/Wnt2b/Maged1/Fgfr2/Slit2/Gdf11/Lgr4/Six4/Bmp4/Fgf2
MG specific, Age reduced	GO:0072163	mesonephric epithelium development	'13/689	101/20565	3.24902e-05	0.00171865	0.00137546	13	Smo/Bdnf/Sfrp1/Crlf1/Wnt2b/Maged1/Fgfr2/Slit2/Gdf11/Lgr4/Six4/Bmp4/Fgf2
MG specific, Age reduced	GO:0072164	mesonephric tubule development	'13/689	101/20565	3.24902e-05	0.00171865	0.00137546	13	Smo/Bdnf/Sfrp1/Crlf1/Wnt2b/Maged1/Fgfr2/Slit2/Gdf11/Lgr4/Six4/Bmp4/Fgf2
MG specific, Age reduced	GO:0030336	negative regulation of cell migration	'21/689	230/20565	3.35372e-05	0.00175158	0.00140181	21	Bmpr1a/Sulf1/Sfrp1/Kank1/Stk26/Cx3cl1/Angpt4/Ppargc1a/Abhd2/Dcn/Stard13/Adora1/Slit2/Tcaf1/Pfn2/Srgap3/Ptpru/Ccr5/Pkp2/Fgf2/Reck
MG specific, Age reduced	GO:0016358	dendrite development	'23/689	267/20565	3.62982e-05	0.00184466	0.00147631	23	Bdnf/Vldlr/Matn2/Map2/Dclk1/Sdc2/Id1/Arhgap44/Bhlhb9/Ntrk2/Myo5b/Akap5/Ptprd/Cobl/Il1rap/Rapgef4/Dlg4/Arc/Cdkl5/Map6/Lrp8/Bbs1/Ptprf
MG specific, Age reduced	GO:1990778	protein localization to cell periphery	'23/689	267/20565	3.62982e-05	0.00184466	0.00147631	23	Efcab7/Krt18/Emp2/Gnai1/Prnp/Cdh2/Arhgap44/Tspan33/Myo5b/Sytl2/Atp1b1/Plekhf1/Ins2/Nfasc/Itga3/Pkp2/Ezr/Jup/Nsg1/Pls1/Bbs1/Arl6/Ttc8
MG specific, Age reduced	GO:0001505	regulation of neurotransmitter levels	'18/689	180/20565	3.66608e-05	0.00184466	0.00147631	18	Syt12/Htr2c/Snap91/Abat/Nat8l/Sytl3/Grm8/Brsk1/Moxd1/Ntrk2/Atp1a2/Maob/Pfn2/Syt17/Unc13b/Snca/Syt9/Prepl
MG specific, Age reduced	GO:0060571	morphogenesis of an epithelial fold	'7/689	29/20565	3.76736e-05	0.00187279	0.00149882	7	Sulf1/Wnt2b/Rdh10/Wnt5a/Fgfr2/Pthlh/Bmp4
MG specific, Age reduced	GO:0030901	midbrain development	'9/689	51/20565	4.35487e-05	0.0021316	0.00170596	9	Sfrp1/Fzd6/Otx2/Lmx1a/Wnt5a/Fgfr2/Msx1/Fzd3/Fgf2
MG specific, Age reduced	GO:0001823	mesonephros development	'13/689	104/20565	4.44299e-05	0.0021316	0.00170596	13	Smo/Bdnf/Sfrp1/Crlf1/Wnt2b/Maged1/Fgfr2/Slit2/Gdf11/Lgr4/Six4/Bmp4/Fgf2
MG specific, Age reduced	GO:2000177	regulation of neural precursor cell proliferation	'13/689	104/20565	4.44299e-05	0.0021316	0.00170596	13	Smo/Spint2/Bdnf/Lrp2/Vegfc/Cdon/Cx3cl1/Cdh2/Wnt5a/Smarcd3/Fzd3/Ccr5/Fgf2
MG specific, Age reduced	GO:0043010	camera-type eye development	'25/689	311/20565	5.32543e-05	0.0025256	0.00202128	25	Gpm6a/Mfrp/Col8a1/Col8a2/Cdon/Tmem231/Myh10/Rdh10/Ntrk2/Fgfr2/Megf11/Smarcd3/Gdf11/Slc4a5/B9d1/Fat1/Bmp4/Aldh1a3/Cryab/Gas1/Ttll5/Arl6/Rpgr/Nphp1/Ttc8
MG specific, Age reduced	GO:0016049	cell growth	'34/689	490/20565	5.52693e-05	0.00253741	0.00203073	34	Smo/Wisp2/Bdnf/Sfrp1/Igfbp2/Plxnb1/Ndn/Dclk1/Wisp1/Tgfb3/Fhl1/Nrn1/Lmx1a/Igfbpl1/Lgi1/Wnt5a/Msx1/Slit2/Myo5b/Tmem108/Ddr1/Sorbs2/Cobl/Bdkrb1/Hrasls/Syt17/Mgll/Ccr5/Cdkl5/Cryab/Gas1/Taf9b/Apbb1/Crabp2
MG specific, Age reduced	GO:0006942	regulation of striated muscle contraction	'11/689	78/20565	5.5673e-05	0.00253741	0.00203073	11	Ace2/Fxyd1/Dsg2/Mylk2/Atp1a2/Adora1/Dsp/Atp1b1/Pde5a/Pkp2/Jup
MG specific, Age reduced	GO:0030324	lung development	'19/689	203/20565	5.6065e-05	0.00253741	0.00203073	19	Bmpr1a/Chil1/Foxj1/Tnc/Tgfb3/Ccdc39/Id1/Lox/Wnt2b/Rdh10/Wnt5a/Ptk7/Fgfr2/Ace/Itga3/Pthlh/Bmp4/Pdpn/Fgf2
MG specific, Age reduced	GO:0055117	regulation of cardiac muscle contraction	'10/689	65/20565	5.65781e-05	0.00253741	0.00203073	10	Ace2/Fxyd1/Dsg2/Atp1a2/Adora1/Dsp/Atp1b1/Pde5a/Pkp2/Jup
MG specific, Age reduced	GO:0060688	regulation of morphogenesis of a branching structure	'10/689	65/20565	5.65781e-05	0.00253741	0.00203073	10	Smo/Sulf1/Sfrp1/Wnt2b/Maged1/Wnt5a/Fgfr2/Lgr4/Six4/Bmp4
MG specific, Age reduced	GO:0072659	protein localization to plasma membrane	'21/689	239/20565	5.88084e-05	0.00260907	0.00208808	21	Krt18/Emp2/Prnp/Cdh2/Arhgap44/Tspan33/Myo5b/Sytl2/Atp1b1/Plekhf1/Ins2/Nfasc/Itga3/Pkp2/Ezr/Jup/Nsg1/Pls1/Bbs1/Arl6/Ttc8
MG specific, Age reduced	GO:0035148	tube formation	'17/689	170/20565	5.98551e-05	0.00262726	0.00210264	17	Spint2/Folr1/Sfrp1/Cthrc1/Fzd6/Lrp2/Enah/Wnt5a/Ptk7/Fgfr2/Cobl/Six4/Fzd3/Bmp4/Zic2/Atoh8/Shroom3
MG specific, Age reduced	GO:0086069	bundle of His cell to Purkinje myocyte communication	'5/689	14/20565	6.47542e-05	0.00280288	0.00224319	5	Dsg2/Cacna2d1/Dsp/Pkp2/Jup
MG specific, Age reduced	GO:0060602	branch elongation of an epithelium	'6/689	22/20565	6.52149e-05	0.00280288	0.00224319	6	Tnc/Rdh10/Wnt5a/Fgfr2/Six4/Bmp4
MG specific, Age reduced	GO:0030323	respiratory tube development	'19/689	206/20565	6.83748e-05	0.00290839	0.00232764	19	Bmpr1a/Chil1/Foxj1/Tnc/Tgfb3/Ccdc39/Id1/Lox/Wnt2b/Rdh10/Wnt5a/Ptk7/Fgfr2/Ace/Itga3/Pthlh/Bmp4/Pdpn/Fgf2
MG specific, Age reduced	GO:0072175	epithelial tube formation	'16/689	156/20565	7.22978e-05	0.00302263	0.00241906	16	Spint2/Folr1/Sfrp1/Cthrc1/Fzd6/Lrp2/Enah/Wnt5a/Ptk7/Fgfr2/Cobl/Six4/Fzd3/Bmp4/Zic2/Shroom3
MG specific, Age reduced	GO:0007178	transmembrane receptor protein serine/threonine kinase signaling pathway	'25/689	317/20565	7.25255e-05	0.00302263	0.00241906	25	Bmpr1a/Folr1/Sulf1/Sfrp1/Lrp2/Fbn1/Fstl3/Tgfb3/Zcchc18/Id1/Nrep/Wnt5a/Rasl11b/Msx1/Crb2/Gdf11/Scx/Itga3/Prdm16/Peg10/Vasn/Bmp4/Msx2/Zic2/Atoh8
MG specific, Age reduced	GO:0060485	mesenchyme development	'21/689	243/20565	7.46919e-05	0.00305128	0.00244199	21	Bmpr1a/Smo/Folr1/Sfrp1/Tgfb3/Rdh10/Wnt5a/Ptk7/Fgfr2/Msx1/Crb2/Has2/Scx/Six4/Vasn/Bmp4/Msx2/Zic2/Pdpn/Hey2/Rflnb
MG specific, Age reduced	GO:0061448	connective tissue development	'21/689	243/20565	7.46919e-05	0.00305128	0.00244199	21	Bmpr1a/Sulf1/Pdgfd/Thbs3/Prrx1/Efemp1/Ppargc1a/Rorc/Nppc/Wnt5a/Msx1/Bmp1/Ift80/Col5a1/Scx/Pthlh/Bmp4/Msx2/Bbs1/Fgf2/Rflnb
MG specific, Age reduced	GO:0010976	positive regulation of neuron projection development	'25/689	318/20565	7.62844e-05	0.00308578	0.0024696	25	Cntn1/Bdnf/Vldlr/Plxnb1/Cx3cl1/Bhlhb9/Wnt5a/Ntrk2/Ptk7/Myo5b/Akap5/Dixdc1/Ptprd/Cobl/Il1rap/Acsl6/Itga3/Syt17/Bmp4/Cdkl5/Tubb2b/Lrp8/Ptprf/Apbb1/Crabp2
MG specific, Age reduced	GO:0009611	response to wounding	'31/689	437/20565	7.78886e-05	0.00309664	0.00247829	31	Acta2/Folr1/Matn2/Myl9/Tyro3/Cxadr/Pdgfd/Fzd6/Tnc/Abat/Kank1/Cx3cl1/Rtn4rl1/Lox/Ajuba/Myh10/Abhd2/Anxa8/Wnt5a/Ptk7/Col5a1/Ddr1/Ins2/Morn4/Pard3/Pdgfc/Msx2/Pdpn/Ptprf/P2rx5/Fgf2
MG specific, Age reduced	GO:0006941	striated muscle contraction	'16/689	157/20565	7.80539e-05	0.00309664	0.00247829	16	Ace2/Fxyd1/Dsg2/Mylk2/Cacna2d1/Atp1a2/Adora1/Dsp/Atp1b1/Pde5a/Synm/Kcnh2/Obsl1/Pkp2/Jup/Mybph
MG specific, Age reduced	GO:0090190	positive regulation of branching involved in ureteric bud morphogenesis	'6/689	23/20565	8.57434e-05	0.00336931	0.00269651	6	Smo/Wnt2b/Maged1/Lgr4/Six4/Bmp4
MG specific, Age reduced	GO:0030509	BMP signaling pathway	'16/689	159/20565	9.07837e-05	0.00353371	0.00282809	16	Bmpr1a/Sulf1/Sfrp1/Lrp2/Fbn1/Fstl3/Tgfb3/Zcchc18/Id1/Wnt5a/Msx1/Crb2/Scx/Itga3/Bmp4/Msx2
MG specific, Age reduced	GO:0060740	prostate gland epithelium morphogenesis	'7/689	33/20565	9.17744e-05	0.00353889	0.00283223	7	Cyp7b1/Sulf1/Sfrp1/Tnc/Wnt5a/Fgfr2/Bmp4
MG specific, Age reduced	GO:0010463	mesenchymal cell proliferation	'9/689	56/20565	9.34239e-05	0.00354488	0.00283703	9	Bmpr1a/Smo/Prrx1/Irs1/Wnt5a/Fgfr2/Msx1/Bmp4/Gas1
MG specific, Age reduced	GO:0051146	striated muscle cell differentiation	'23/689	284/20565	9.36482e-05	0.00354488	0.00283703	23	Smo/Bdnf/Cxadr/Igf2/Wisp1/Nox4/Ankrd23/Cdon/Mylk2/Cdh2/Myh10/Msx1/Nek5/Sorbs2/Ins2/Six4/Obsl1/Lmod1/Bmp4/Fhl2/Mybph/Hey2/Flnc
MG specific, Age reduced	GO:0015849	organic acid transport	'22/689	266/20565	9.72786e-05	0.00364883	0.00292022	22	Slc16a9/Slc6a14/Folr1/Bdnf/Slco1c1/Htr2c/Ace2/Fxyd1/Lrp2/Abat/Stk39/Ntrk2/Slc6a17/Slc6a20a/Adora1/Slc16a4/Acsl6/Ace/Tmem27/Slco1a5/Mfsd2a/Snca
MG specific, Age reduced	GO:0001841	neural tube formation	'14/689	128/20565	0.000101088	0.00375754	0.00300722	14	Spint2/Folr1/Sfrp1/Cthrc1/Fzd6/Lrp2/Enah/Wnt5a/Ptk7/Cobl/Fzd3/Bmp4/Zic2/Shroom3
MG specific, Age reduced	GO:0010464	regulation of mesenchymal cell proliferation	'8/689	45/20565	0.000109654	0.00402112	0.00321816	8	Bmpr1a/Smo/Prrx1/Irs1/Wnt5a/Fgfr2/Bmp4/Gas1
MG specific, Age reduced	GO:0001539	cilium or flagellum-dependent cell motility	'6/689	24/20565	0.000111102	0.00402112	0.00321816	6	Cfap44/Drc1/Ccdc39/Tekt1/Rsph9/Bbs1
MG specific, Age reduced	GO:0060285	cilium-dependent cell motility	'6/689	24/20565	0.000111102	0.00402112	0.00321816	6	Cfap44/Drc1/Ccdc39/Tekt1/Rsph9/Bbs1
MG specific, Age reduced	GO:0060512	prostate gland morphogenesis	'7/689	34/20565	0.000112254	0.00402747	0.00322325	7	Cyp7b1/Sulf1/Sfrp1/Tnc/Wnt5a/Fgfr2/Bmp4
MG specific, Age reduced	GO:0051216	cartilage development	'17/689	179/20565	0.000113668	0.00404304	0.00323571	17	Bmpr1a/Sulf1/Thbs3/Prrx1/Efemp1/Nppc/Wnt5a/Msx1/Bmp1/Ift80/Scx/Pthlh/Bmp4/Msx2/Bbs1/Fgf2/Rflnb
MG specific, Age reduced	GO:0007015	actin filament organization	'26/689	346/20565	0.000115745	0.00408173	0.00326667	26	Ppm1e/Eln/Cald1/Nox4/Tgfb3/Enah/Emp2/Kank1/Baiap2l1/Id1/Myh10/Hip1r/Slit2/Pfn2/Cobl/Kirrel/Obsl1/Lmod1/Fat1/Ezr/Mybph/Pls1/Plekhg2/Rflnb/Ttc8/Gm14137
MG specific, Age reduced	GO:0021543	pallium development	'15/689	146/20565	0.000118165	0.00413177	0.00330672	15	Smo/Ccdc141/Emx2/Efhc1/Cdon/Lamb1/Lmx1a/Cdh2/Ntrk2/Slit2/Dixdc1/Tmem108/Mfsd2a/Lrp8/Bbs1
MG specific, Age reduced	GO:0034113	heterotypic cell-cell adhesion	'8/689	46/20565	0.000128885	0.00446872	0.00357639	8	Perp/Cxadr/Dsg2/Itga7/Dsp/Madcam1/Pkp2/Jup
MG specific, Age reduced	GO:0048638	regulation of developmental growth	'26/689	349/20565	0.000132989	0.00457259	0.00365952	26	Bmpr1a/Smo/Bdnf/Wwc1/Sfrp1/Cxadr/Ncam1/Igf2/Wisp1/Nppc/Wnt5a/Fgfr2/Slit2/Myo5b/Six4/Syt17/Mgll/Ccr5/Ezr/Bmp4/Cdkl5/Pls1/Hey2/P2rx5/Fgf2/Crabp2
MG specific, Age reduced	GO:0061138	morphogenesis of a branching epithelium	'19/689	217/20565	0.00013649	0.00465418	0.00372482	19	Smo/Spint2/Sulf1/Sfrp1/Tnc/Wnt2b/Rdh10/Maged1/Slc12a2/Wnt5a/Fgfr2/Slit2/Llgl2/Lgr4/Ddr1/Six4/Bmp4/Msx2/Fgf2
MG specific, Age reduced	GO:0061213	positive regulation of mesonephros development	'6/689	25/20565	0.000142069	0.00478447	0.00382909	6	Smo/Wnt2b/Maged1/Lgr4/Six4/Bmp4
MG specific, Age reduced	GO:0045666	positive regulation of neuron differentiation	'29/689	411/20565	0.000143926	0.00478447	0.00382909	29	Cntn1/Bdnf/Vldlr/Plxnb1/Cdon/Lmx1a/Cx3cl1/Bhlhb9/Wnt5a/Ntrk2/Ptk7/Myo5b/Akap5/Dixdc1/Ptprd/Cobl/Il1rap/Acsl6/Nap1l2/Itga3/Syt17/Ccr5/Bmp4/Cdkl5/Tubb2b/Lrp8/Ptprf/Apbb1/Crabp2
MG specific, Age reduced	GO:0043410	positive regulation of MAPK cascade	'32/689	473/20565	0.00014473	0.00478447	0.00382909	32	Acta2/Chil1/Htr2c/Wwc1/Pdgfd/Igf2/C1qtnf3/Nox4/Tgfb3/Mt3/Cdon/Kl/Cx3cl1/Ccl20/Cdh2/Ajuba/Maged1/Tpd52l1/Cavin3/Wnt5a/Ntrk2/Fgfr2/Plce1/Adora1/Dixdc1/Ins2/Pde5a/Pdgfc/Bmp4/St5/Fgf2/5730559C18Rik
MG specific, Age reduced	GO:0048588	developmental cell growth	'19/689	218/20565	0.000144949	0.00478447	0.00382909	19	Smo/Bdnf/Plxnb1/Ndn/Dclk1/Wisp1/Nrn1/Wnt5a/Slit2/Myo5b/Tmem108/Ddr1/Sorbs2/Cobl/Syt17/Mgll/Ccr5/Cdkl5/Crabp2
MG specific, Age reduced	GO:0007528	neuromuscular junction development	'8/689	47/20565	0.000150814	0.00493855	0.0039524	8	Tnc/Col4a5/Ntrk2/Fgfr2/Pdzrn3/Dok7/Six4/Unc13b
MG specific, Age reduced	GO:0031032	actomyosin structure organization	'17/689	184/20565	0.000159013	0.00511682	0.00409507	17	Ppm1e/Eln/Nox4/Tgfb3/Epb41l4a/Ankrd23/Myh10/Pfn2/Cnn1/Six4/Obsl1/Lmod1/Limch1/Lurap1/Frmd5/Mybph/Ttc8
MG specific, Age reduced	GO:0001838	embryonic epithelial tube formation	'15/689	150/20565	0.000159978	0.00511682	0.00409507	15	Spint2/Folr1/Sfrp1/Cthrc1/Fzd6/Lrp2/Enah/Wnt5a/Ptk7/Cobl/Six4/Fzd3/Bmp4/Zic2/Shroom3
MG specific, Age reduced	GO:0034764	positive regulation of transmembrane transport	'15/689	150/20565	0.000159978	0.00511682	0.00409507	15	Fxyd1/Stk39/Cacna2d1/Azin2/Car2/Tcaf1/Atp1b1/Bdkrb1/Kcnh2/Acsl6/Bmp4/Snca/Trpc1/Arc/Cemip
MG specific, Age reduced	GO:0008286	insulin receptor signaling pathway	'12/689	103/20565	0.000171434	0.00544105	0.00435456	12	Igf2/Kank1/Kl/Baiap2l1/Grb14/Irs1/Pik3r3/Sesn3/Ins2/Dnaic1/Stxbp4/Ptprf
MG specific, Age reduced	GO:0061311	cell surface receptor signaling pathway involved in heart development	'6/689	26/20565	0.000179491	0.00556826	0.00445637	6	Bmpr1a/Wnt5a/Msx1/Bmp4/Msx2/Hey2
MG specific, Age reduced	GO:0090189	regulation of branching involved in ureteric bud morphogenesis	'6/689	26/20565	0.000179491	0.00556826	0.00445637	6	Smo/Wnt2b/Maged1/Lgr4/Six4/Bmp4
MG specific, Age reduced	GO:1903959	regulation of anion transmembrane transport	'6/689	26/20565	0.000179491	0.00556826	0.00445637	6	Fxyd1/Prnp/Stk39/Tcaf1/Acsl6/Tcaf2
MG specific, Age reduced	GO:0050773	regulation of dendrite development	'16/689	169/20565	0.000185603	0.00571492	0.00457375	16	Vldlr/Sdc2/Id1/Arhgap44/Bhlhb9/Ntrk2/Myo5b/Akap5/Ptprd/Cobl/Il1rap/Rapgef4/Arc/Cdkl5/Lrp8/Ptprf
MG specific, Age reduced	GO:0021915	neural tube development	'17/689	187/20565	0.000193216	0.00577257	0.00461988	17	Smo/Spint2/Folr1/Sfrp1/Cthrc1/Fzd6/Lrp2/Enah/Wnt5a/Ptk7/Cobl/Fzd3/Sall2/Bmp4/Zic2/Gas1/Shroom3
MG specific, Age reduced	GO:0099531	presynaptic process involved in chemical synaptic transmission	'14/689	136/20565	0.000193348	0.00577257	0.00461988	14	Syt12/Htr2c/Snap91/Nat8l/Sytl3/Grm8/Brsk1/Ntrk2/Pfn2/Syt17/Unc13b/Snca/Syt9/Prepl
MG specific, Age reduced	GO:0002053	positive regulation of mesenchymal cell proliferation	'7/689	37/20565	0.000196891	0.00577257	0.00461988	7	Bmpr1a/Smo/Prrx1/Irs1/Wnt5a/Fgfr2/Gas1
MG specific, Age reduced	GO:0045197	establishment or maintenance of epithelial cell apical/basal polarity	'7/689	37/20565	0.000196891	0.00577257	0.00461988	7	Dlg3/Wnt5a/Ptk7/Crb2/Crb3/Fat1/Dlg4
MG specific, Age reduced	GO:0001503	ossification	'27/689	378/20565	0.000198182	0.00577257	0.00461988	27	Bmpr1a/Smo/Sfrp1/Plxnb1/Cthrc1/Thbs3/Igf2/Tnc/Ddr2/Fstl3/Kl/Id1/Nppc/Wnt5a/Fgfr2/Bmp1/Ift80/Smoc1/Lgr4/Scx/Mrc2/Pthlh/Bmp4/Fhl2/Msx2/Fgf2/Rflnb
MG specific, Age reduced	GO:0016055	Wnt signaling pathway	'27/689	378/20565	0.000198182	0.00577257	0.00461988	27	Folr1/Sulf1/Sfrp1/Cthrc1/Fzd6/Wisp1/Kank1/Nxn/Lmx1a/Wnt2b/Cdh2/Cdh3/Wnt5a/Ptk7/Fgfr2/Mark1/Ndrg2/Ift80/Amer2/Lgr4/Dixdc1/Ptpru/Ins2/Itga3/Fzd3/Arl6/Fgf2
MG specific, Age reduced	GO:0071772	response to BMP	'16/689	170/20565	0.000198668	0.00577257	0.00461988	16	Bmpr1a/Sulf1/Sfrp1/Lrp2/Fbn1/Fstl3/Tgfb3/Zcchc18/Id1/Wnt5a/Msx1/Crb2/Scx/Itga3/Bmp4/Msx2
MG specific, Age reduced	GO:0071773	cellular response to BMP stimulus	'16/689	170/20565	0.000198668	0.00577257	0.00461988	16	Bmpr1a/Sulf1/Sfrp1/Lrp2/Fbn1/Fstl3/Tgfb3/Zcchc18/Id1/Wnt5a/Msx1/Crb2/Scx/Itga3/Bmp4/Msx2
MG specific, Age reduced	GO:0021987	cerebral cortex development	'12/689	105/20565	0.000205912	0.00594121	0.00475485	12	Smo/Ccdc141/Emx2/Efhc1/Cdon/Lamb1/Cdh2/Ntrk2/Slit2/Dixdc1/Lrp8/Bbs1
MG specific, Age reduced	GO:0043270	positive regulation of ion transport	'22/689	281/20565	0.000213846	0.00612728	0.00490376	22	Cntn1/Htr2c/Fxyd1/Abat/Fhl1/Nat8l/Stk39/Cacna2d1/Itpr1/Adora1/Akap5/Tcaf1/Atp1b1/Bdkrb1/Kcnh2/Acsl6/Tmem27/Bmp4/Snca/Trpc1/Arc/Cemip
MG specific, Age reduced	GO:0198738	cell-cell signaling by wnt	'27/689	380/20565	0.000215737	0.00612773	0.00490413	27	Folr1/Sulf1/Sfrp1/Cthrc1/Fzd6/Wisp1/Kank1/Nxn/Lmx1a/Wnt2b/Cdh2/Cdh3/Wnt5a/Ptk7/Fgfr2/Mark1/Ndrg2/Ift80/Amer2/Lgr4/Dixdc1/Ptpru/Ins2/Itga3/Fzd3/Arl6/Fgf2
MG specific, Age reduced	GO:0061180	mammary gland epithelium development	'10/689	76/20565	0.000216832	0.00612773	0.00490413	10	Smo/Slc12a2/Wnt5a/Fgfr2/Msx1/Slit2/Ddr1/Pthlh/Msx2/Fgf2
MG specific, Age reduced	GO:0016264	gap junction assembly	'4/689	10/20565	0.000223216	0.00623769	0.00499213	4	Ace2/Gjb2/Ace/Pkp2
MG specific, Age reduced	GO:0006936	muscle contraction	'22/689	282/20565	0.000224818	0.00623769	0.00499213	22	Acta2/Sulf1/Ace2/Fxyd1/Cald1/Abat/Dsg2/Mylk2/Cacna2d1/Atp1a2/Adora1/Dsp/Atp1b1/Pde5a/Synm/Arhgap42/Kcnh2/Obsl1/Lmod1/Pkp2/Jup/Mybph
MG specific, Age reduced	GO:0044070	regulation of anion transport	'12/689	106/20565	0.000225258	0.00623769	0.00499213	12	Htr2c/Fxyd1/Abat/Prnp/Stk39/Car2/Adora1/Tcaf1/Acsl6/Tmem27/Snca/Tcaf2
MG specific, Age reduced	GO:0048736	appendage development	'17/689	190/20565	0.000233663	0.00638472	0.00510979	17	Bmpr1a/Fras1/Prrx1/Fzd6/Tmem231/Rdh10/Wnt5a/Fgfr2/Msx1/Smoc1/B9d1/Scx/Bmp4/Msx2/Gas1/Reck/Crabp2
MG specific, Age reduced	GO:0060173	limb development	'17/689	190/20565	0.000233663	0.00638472	0.00510979	17	Bmpr1a/Fras1/Prrx1/Fzd6/Tmem231/Rdh10/Wnt5a/Fgfr2/Msx1/Smoc1/B9d1/Scx/Bmp4/Msx2/Gas1/Reck/Crabp2
MG specific, Age reduced	GO:0071417	cellular response to organonitrogen compound	'28/689	403/20565	0.000240103	0.00651753	0.00521609	28	Col5a2/Folr1/Sfrp1/Pdgfd/Igf2/Prnp/Kank1/Kl/Baiap2l1/Grb14/Irs1/Cacna2d1/Gpd1/Pik3r3/Itpr1/Ntrk2/Car2/Mmp3/Sesn3/Slit2/Aplp1/Ins2/Pdgfc/Dnaic1/Ezr/Jup/Stxbp4/Ptprf
MG specific, Age reduced	GO:0048762	mesenchymal cell differentiation	'17/689	191/20565	0.00024869	0.00666616	0.00533504	17	Bmpr1a/Smo/Folr1/Sfrp1/Tgfb3/Rdh10/Wnt5a/Fgfr2/Msx1/Crb2/Has2/Vasn/Bmp4/Msx2/Pdpn/Hey2/Rflnb
MG specific, Age reduced	GO:0001649	osteoblast differentiation	'18/689	209/20565	0.00024881	0.00666616	0.00533504	18	Bmpr1a/Smo/Sfrp1/Cthrc1/Igf2/Tnc/Ddr2/Id1/Nppc/Ift80/Smoc1/Lgr4/Mrc2/Pthlh/Bmp4/Fhl2/Msx2/Fgf2
MG specific, Age reduced	GO:0046942	carboxylic acid transport	'21/689	265/20565	0.000250539	0.00666918	0.00533746	21	Slc16a9/Slc6a14/Folr1/Bdnf/Slco1c1/Htr2c/Ace2/Lrp2/Abat/Stk39/Ntrk2/Slc6a17/Slc6a20a/Adora1/Slc16a4/Acsl6/Ace/Tmem27/Slco1a5/Mfsd2a/Snca
MG specific, Age reduced	GO:0060348	bone development	'17/689	192/20565	0.000264551	0.00699703	0.00559983	17	Sulf1/Plxnb1/Thbs3/Fbn1/Frem1/Nppc/Fgfr2/Msx1/Ift80/Has2/Scx/Pdgfc/Pthlh/Bmp4/Msx2/Ttc9/Rflnb
MG specific, Age reduced	GO:1904888	cranial skeletal system development	'9/689	64/20565	0.000267688	0.00703491	0.00563015	9	Prrx1/Tgfb3/Rdh10/Frem1/Fgfr2/Six4/Bmp4/Msx2/Gas1
MG specific, Age reduced	GO:0001736	establishment of planar polarity	'8/689	51/20565	0.00027148	0.0070894	0.00567376	8	Sfrp1/Cthrc1/Fzd6/Dlg3/Wnt5a/Ptk7/Fzd3/Ttc8
MG specific, Age reduced	GO:0030510	regulation of BMP signaling pathway	'11/689	93/20565	0.000277314	0.00710963	0.00568995	11	Sulf1/Sfrp1/Lrp2/Fbn1/Fstl3/Wnt5a/Msx1/Crb2/Itga3/Bmp4/Msx2
MG specific, Age reduced	GO:0045992	negative regulation of embryonic development	'6/689	28/20565	0.000277424	0.00710963	0.00568995	6	Col5a2/Sulf1/Wnt5a/Col5a1/Fzd3/Bmp4
MG specific, Age reduced	GO:0061217	regulation of mesonephros development	'6/689	28/20565	0.000277424	0.00710963	0.00568995	6	Smo/Wnt2b/Maged1/Lgr4/Six4/Bmp4
MG specific, Age reduced	GO:0035265	organ growth	'16/689	176/20565	0.000295118	0.00751641	0.0060155	16	Bmpr1a/Smo/Wwc1/Cxadr/Thbs3/Ncam1/Wisp1/Ddr2/Nppc/Fgfr2/Sorbs2/Evc/Msx2/Hey2/Tenm4/Fgf2
MG specific, Age reduced	GO:0030326	embryonic limb morphogenesis	'14/689	142/20565	0.000303544	0.00763671	0.00611178	14	Bmpr1a/Fras1/Prrx1/Fzd6/Tmem231/Rdh10/Wnt5a/Msx1/B9d1/Bmp4/Msx2/Gas1/Reck/Crabp2
MG specific, Age reduced	GO:0035113	embryonic appendage morphogenesis	'14/689	142/20565	0.000303544	0.00763671	0.00611178	14	Bmpr1a/Fras1/Prrx1/Fzd6/Tmem231/Rdh10/Wnt5a/Msx1/B9d1/Bmp4/Msx2/Gas1/Reck/Crabp2
MG specific, Age reduced	GO:0007164	establishment of tissue polarity	'8/689	52/20565	0.000311546	0.00779053	0.00623489	8	Sfrp1/Cthrc1/Fzd6/Dlg3/Wnt5a/Ptk7/Fzd3/Ttc8
MG specific, Age reduced	GO:0048738	cardiac muscle tissue development	'19/689	232/20565	0.000322024	0.00793192	0.00634805	19	Bmpr1a/Cxadr/Ncam1/Lrp2/Wisp1/Nox4/Dsg2/Mylk2/Myh10/Wnt5a/Fgfr2/Dsp/Sorbs2/Pkp2/Bmp4/Fhl2/Hey2/Tenm4/Fgf2
MG specific, Age reduced	GO:0048813	dendrite morphogenesis	'15/689	160/20565	0.000324617	0.00793192	0.00634805	15	Vldlr/Dclk1/Sdc2/Id1/Arhgap44/Bhlhb9/Myo5b/Akap5/Ptprd/Dlg4/Arc/Cdkl5/Map6/Lrp8/Ptprf
MG specific, Age reduced	GO:0048854	brain morphogenesis	'7/689	40/20565	0.000326812	0.00793192	0.00634805	7	Smo/Otx2/Cdh2/Wnt5a/Slc4a10/Spef2/Bbs1
MG specific, Age reduced	GO:0060603	mammary gland duct morphogenesis	'7/689	40/20565	0.000326812	0.00793192	0.00634805	7	Slc12a2/Wnt5a/Fgfr2/Slit2/Ddr1/Pthlh/Msx2
MG specific, Age reduced	GO:0070830	bicellular tight junction assembly	'7/689	40/20565	0.000326812	0.00793192	0.00634805	7	Ocln/Cldn1/Pard3/Pkp2/Cgn/Cldn3/Nphp1
MG specific, Age reduced	GO:0003012	muscle system process	'26/689	370/20565	0.00033259	0.00802495	0.0064225	26	Acta2/Sulf1/Ace2/Fxyd1/Cald1/Wisp1/Abat/Dsg2/Mylk2/Cacna2d1/Pde9a/Atp1a2/Adora1/Dsp/Atp1b1/Sorbs2/Pde5a/Synm/Arhgap42/Kcnh2/Obsl1/Lmod1/Pkp2/Jup/Mybph/Hey2
MG specific, Age reduced	GO:0044057	regulation of system process	'32/689	496/20565	0.000337386	0.00809335	0.00647724	32	Htr2c/Cxadr/Ace2/Fxyd1/Ncam1/Cald1/Wisp1/C1qtnf3/Abat/Emp2/Dsg2/Mylk2/Stk39/Cx3cl1/Cacna2d1/Pde9a/Atp1a2/Hip1r/Adora1/Dsp/Atp1b1/Pde5a/Arhgap42/Pard3/Kcnh2/Ace/Rapgef4/Mgll/Pkp2/Jup/Hey2/Tenm4
MG specific, Age reduced	GO:0038063	collagen-activated tyrosine kinase receptor signaling pathway	'4/689	11/20565	0.000341482	0.00814425	0.00651797	4	Ddr2/Col4a5/Col4a3/Ddr1
MG specific, Age reduced	GO:0033674	positive regulation of kinase activity	'30/689	454/20565	0.000344159	0.00816092	0.00653132	30	Chil1/Vldlr/Pdgfd/Clu/Pifo/Ddr2/Nox4/Tgfb3/Emp2/Prnp/Stk39/Irs1/Ajuba/Maged1/Tpd52l1/Wnt5a/Plce1/Adora1/Dok7/Ins2/Pde5a/Pdgfc/Ace/Bmp4/Snca/Gckr/Cemip/Lrp8/Fgf2/5730559C18Rik
MG specific, Age reduced	GO:1990138	neuron projection extension	'15/689	161/20565	0.000347149	0.00818479	0.00655042	15	Smo/Bdnf/Plxnb1/Ndn/Dclk1/Nrn1/Wnt5a/Slit2/Myo5b/Tmem108/Ddr1/Syt17/Mgll/Ccr5/Cdkl5
MG specific, Age reduced	GO:0048839	inner ear development	'17/689	197/20565	0.000357731	0.00838635	0.00671173	17	C1qtnf5/Bdnf/Cthrc1/Prrx1/Fzd6/Otx2/Wnt5a/Ptk7/Fgfr2/Plppr4/Lrig1/Six4/Fzd3/Bmp4/Aldh1a3/Hey2/Ttc8
MG specific, Age reduced	GO:0060349	bone morphogenesis	'11/689	96/20565	0.000366478	0.00847231	0.00678053	11	Thbs3/Frem1/Nppc/Fgfr2/Msx1/Ift80/Has2/Scx/Pthlh/Bmp4/Msx2
MG specific, Age reduced	GO:0001837	epithelial to mesenchymal transition	'13/689	128/20565	0.000369611	0.00847231	0.00678053	13	Sfrp1/Tgfb3/Wnt5a/Fgfr2/Msx1/Crb2/Has2/Vasn/Bmp4/Msx2/Pdpn/Hey2/Rflnb
MG specific, Age reduced	GO:0007269	neurotransmitter secretion	'13/689	128/20565	0.000369611	0.00847231	0.00678053	13	Syt12/Htr2c/Snap91/Sytl3/Grm8/Brsk1/Ntrk2/Pfn2/Syt17/Unc13b/Snca/Syt9/Prepl
MG specific, Age reduced	GO:0099643	signal release from synapse	'13/689	128/20565	0.000369611	0.00847231	0.00678053	13	Syt12/Htr2c/Snap91/Sytl3/Grm8/Brsk1/Ntrk2/Pfn2/Syt17/Unc13b/Snca/Syt9/Prepl
MG specific, Age reduced	GO:0001763	morphogenesis of a branching structure	'19/689	235/20565	0.000378294	0.00857606	0.00686356	19	Smo/Spint2/Sulf1/Sfrp1/Tnc/Wnt2b/Rdh10/Maged1/Slc12a2/Wnt5a/Fgfr2/Slit2/Llgl2/Lgr4/Ddr1/Six4/Bmp4/Msx2/Fgf2
MG specific, Age reduced	GO:0048705	skeletal system morphogenesis	'19/689	235/20565	0.000378294	0.00857606	0.00686356	19	Sfrp1/Thbs3/Prrx1/Tgfb3/Rdh10/Frem1/Nppc/Fgfr2/Msx1/Ift80/Spef2/Has2/Scx/Six4/Pthlh/Bmp4/Msx2/Gas1/Rflnb
MG specific, Age reduced	GO:0010470	regulation of gastrulation	'7/689	41/20565	0.000382836	0.0086316	0.00690801	7	Bmpr1a/Col5a2/Otx2/Crb2/Col5a1/Scx/Tenm4
MG specific, Age reduced	GO:0010770	positive regulation of cell morphogenesis involved in differentiation	'15/689	163/20565	0.000396271	0.0088367	0.00707216	15	Enpp2/Bdnf/Plxnb1/Bhlhb9/Ntrk2/Myo5b/Akap5/Dixdc1/Ptprd/Has2/Cdkl5/Tubb2b/Lrp8/Ptprf/Crabp2
MG specific, Age reduced	GO:0098742	cell-cell adhesion via plasma-membrane adhesion molecules	'15/689	163/20565	0.000396271	0.0088367	0.00707216	15	Cldn2/Cxadr/Dsg2/Cx3cl1/Cdh2/Cdh3/Ajuba/Pcdh18/Ptprd/Fgfrl1/Cldn1/Cadm2/Cldn3/Ptprf/Tenm4
MG specific, Age reduced	GO:0030335	positive regulation of cell migration	'30/689	458/20565	0.000398358	0.0088367	0.00707216	30	Lbp/Acta2/Smo/Enpp2/Pdgfd/Ddr2/Nox4/Vegfc/Lamb1/Cx3cl1/Angpt4/Irs1/Ccl20/Amot/Wnt5a/Mmp3/Madcam1/Has2/Bdkrb1/Pdgfc/Rapgef4/Itga3/Ccr5/Bmp4/Lamc2/Tcaf2/Pdpn/Atoh8/Cemip/Fgf2
MG specific, Age reduced	GO:0003205	cardiac chamber development	'16/689	181/20565	0.000404111	0.00886894	0.00709796	16	Bmpr1a/Smo/Lrp2/Myh10/Wnt5a/Ptk7/Fgfr2/Dsp/Smarcd3/Fgfrl1/Adamts6/Pkp2/Bmp4/Fhl2/Msx2/Hey2
MG specific, Age reduced	GO:0008217	regulation of blood pressure	'16/689	181/20565	0.000404111	0.00886894	0.00709796	16	Acta2/Npr3/Ace2/Abat/Emp2/Vegfc/Kl/Stk39/Ncald/Atp1a2/Adora1/Slc4a5/Ephx2/Arhgap42/Bdkrb1/Ace
MG specific, Age reduced	GO:0044319	wound healing, spreading of cells	'6/689	30/20565	0.000413027	0.00896921	0.0071782	6	Ajuba/Col5a1/Ddr1/Pard3/Msx2/Pdpn
MG specific, Age reduced	GO:0090505	epiboly involved in wound healing	'6/689	30/20565	0.000413027	0.00896921	0.0071782	6	Ajuba/Col5a1/Ddr1/Pard3/Msx2/Pdpn
MG specific, Age reduced	GO:0014812	muscle cell migration	'11/689	98/20565	0.000438394	0.00947024	0.00757919	11	Bmpr1a/Smo/Pdgfd/Nox4/Ppargc1a/Slit2/Ddr1/Has2/Six4/Ace/Rapgef4
MG specific, Age reduced	GO:0030199	collagen fibril organization	'7/689	42/20565	0.000446284	0.00959045	0.0076754	7	Col5a2/Ddr2/P3h4/Lox/Col5a1/Scx/Mmp11
MG specific, Age reduced	GO:0061337	cardiac conduction	'8/689	55/20565	0.000461554	0.00976117	0.00781202	8	Cxadr/Ace2/Dsg2/Cacna2d1/Dsp/Kcnh2/Pkp2/Jup
MG specific, Age reduced	GO:0086003	cardiac muscle cell contraction	'8/689	55/20565	0.000461554	0.00976117	0.00781202	8	Fxyd1/Dsg2/Cacna2d1/Atp1a2/Dsp/Kcnh2/Pkp2/Jup
MG specific, Age reduced	GO:0042471	ear morphogenesis	'13/689	131/20565	0.000462775	0.00976117	0.00781202	13	Cthrc1/Prrx1/Fzd6/Otx2/Wnt5a/Ptk7/Fgfr2/Msx1/Lrig1/Six4/Fzd3/Aldh1a3/Gas1
MG specific, Age reduced	GO:0030705	cytoskeleton-dependent intracellular transport	'14/689	148/20565	0.000463691	0.00976117	0.00781202	14	Hook1/Klc3/Dync2li1/Kif1a/Ift80/Bicd1/Wdr35/Tmem108/Kif5c/Ttc26/Ift74/Bbs1/Rpgr/Ift81
MG specific, Age reduced	GO:2000021	regulation of ion homeostasis	'17/689	202/20565	0.000478049	0.0100123	0.00801304	17	Htr2c/Fhl1/Prnp/Stk39/Itpr1/Dcn/Car2/Adora1/Akap5/Bdkrb1/Ace/Ccr5/Bmp4/Snca/Trpc1/Cemip/Fgf2
MG specific, Age reduced	GO:0010632	regulation of epithelial cell migration	'16/689	184/20565	0.000484875	0.010104	0.00808641	16	Enpp2/Emp2/Vegfc/Angpt4/Amot/Dcn/Wnt5a/Stard13/Slit2/Pfn2/Has2/Itga3/Ccr5/Bmp4/Atoh8/Fgf2
MG specific, Age reduced	GO:0006937	regulation of muscle contraction	'14/689	149/20565	0.00049638	0.010171	0.00814	14	Ace2/Fxyd1/Cald1/Abat/Dsg2/Mylk2/Atp1a2/Adora1/Dsp/Atp1b1/Pde5a/Arhgap42/Pkp2/Jup
MG specific, Age reduced	GO:0090504	epiboly	'6/689	31/20565	0.000497783	0.010171	0.00814	6	Ajuba/Col5a1/Ddr1/Pard3/Msx2/Pdpn
MG specific, Age reduced	GO:0010970	transport along microtubule	'13/689	132/20565	0.000497949	0.010171	0.00814	13	Klc3/Dync2li1/Kif1a/Ift80/Bicd1/Wdr35/Tmem108/Kif5c/Ttc26/Ift74/Bbs1/Rpgr/Ift81
MG specific, Age reduced	GO:0099111	microtubule-based transport	'13/689	132/20565	0.000497949	0.010171	0.00814	13	Klc3/Dync2li1/Kif1a/Ift80/Bicd1/Wdr35/Tmem108/Kif5c/Ttc26/Ift74/Bbs1/Rpgr/Ift81
MG specific, Age reduced	GO:0034329	cell junction assembly	'15/689	167/20565	0.000512602	0.0102645	0.00821483	15	Enpp2/Lsr/Ace2/Gjb2/Ajuba/Ocln/Cldn1/Nfasc/Pard3/Ace/Pkp2/Cgn/Jup/Cldn3/Nphp1
MG specific, Age reduced	GO:0035107	appendage morphogenesis	'15/689	167/20565	0.000512602	0.0102645	0.00821483	15	Bmpr1a/Fras1/Prrx1/Fzd6/Tmem231/Rdh10/Wnt5a/Fgfr2/Msx1/B9d1/Bmp4/Msx2/Gas1/Reck/Crabp2
MG specific, Age reduced	GO:0035108	limb morphogenesis	'15/689	167/20565	0.000512602	0.0102645	0.00821483	15	Bmpr1a/Fras1/Prrx1/Fzd6/Tmem231/Rdh10/Wnt5a/Fgfr2/Msx1/B9d1/Bmp4/Msx2/Gas1/Reck/Crabp2
MG specific, Age reduced	GO:0003382	epithelial cell morphogenesis	'7/689	43/20565	0.000517846	0.0102645	0.00821483	7	Spint2/Id1/Arhgef26/Pard3/Fat1/Cgn/Cldn3
MG specific, Age reduced	GO:0003279	cardiac septum development	'12/689	116/20565	0.000519941	0.0102645	0.00821483	12	Bmpr1a/Smo/Lrp2/Myh10/Wnt5a/Ptk7/Fgfr2/Fgfrl1/Adamts6/Bmp4/Msx2/Hey2
MG specific, Age reduced	GO:0031503	protein complex localization	'12/689	116/20565	0.000519941	0.0102645	0.00821483	12	C1qtnf3/Klc3/Dync2li1/Ift80/Wdr35/Stxbp6/Ezr/Ttc26/Ift74/Bbs1/Rpgr/Ift81
MG specific, Age reduced	GO:0060048	cardiac muscle contraction	'12/689	116/20565	0.000519941	0.0102645	0.00821483	12	Ace2/Fxyd1/Dsg2/Cacna2d1/Atp1a2/Adora1/Dsp/Atp1b1/Pde5a/Kcnh2/Pkp2/Jup
MG specific, Age reduced	GO:0046626	regulation of insulin receptor signaling pathway	'8/689	56/20565	0.000522909	0.0102739	0.00822238	8	Igf2/Kank1/Baiap2l1/Grb14/Irs1/Sesn3/Ins2/Ptprf
MG specific, Age reduced	GO:0001738	morphogenesis of a polarized epithelium	'9/689	70/20565	0.000529017	0.0102959	0.00823995	9	Sfrp1/Cthrc1/Fzd6/Dlg3/Wnt5a/Ptk7/Crb3/Fzd3/Ttc8
MG specific, Age reduced	GO:0042733	embryonic digit morphogenesis	'9/689	70/20565	0.000529017	0.0102959	0.00823995	9	Bmpr1a/Fzd6/Tmem231/Wnt5a/Msx1/B9d1/Bmp4/Msx2/Gas1
MG specific, Age reduced	GO:0007611	learning or memory	'20/689	261/20565	0.000535937	0.0103816	0.00830855	20	Cyp7b1/Bdnf/Ppp1r1b/Ncam1/Igf2/Prnp/Cntnap2/Bace1/Lamb1/Lmx1a/Rcan2/Bhlhb9/Ntrk2/Atp1a2/Rin1/Pde5a/Itga3/Shank2/Aff2/Apbb1
MG specific, Age reduced	GO:0033002	muscle cell proliferation	'17/689	205/20565	0.000565809	0.0109039	0.00872656	17	Bmpr1a/Npr3/Cxadr/Ace2/Pdgfd/Ncam1/Wisp1/Tgfb3/Cx3cl1/Ppargc1a/Fgfr2/Ndrg2/Cnn1/Bmp4/Hey2/Tenm4/Fgf2
MG specific, Age reduced	GO:0048814	regulation of dendrite morphogenesis	'11/689	101/20565	0.000568186	0.0109039	0.00872656	11	Sdc2/Id1/Arhgap44/Bhlhb9/Myo5b/Akap5/Ptprd/Arc/Cdkl5/Lrp8/Ptprf
MG specific, Age reduced	GO:0051272	positive regulation of cellular component movement	'31/689	490/20565	0.000576697	0.011016	0.00881628	31	Lbp/Acta2/Smo/Enpp2/Pdgfd/Ddr2/Nox4/Vegfc/Lamb1/Cx3cl1/Angpt4/Irs1/Ccl20/Amot/Wnt5a/Mmp3/Madcam1/Has2/Bdkrb1/Pdgfc/Rapgef4/Itga3/Ccr5/Bmp4/Lamc2/Tcaf2/Pdpn/Atoh8/Tubb2b/Cemip/Fgf2
MG specific, Age reduced	GO:0021591	ventricular system development	'6/689	32/20565	0.000595477	0.0112199	0.00897946	6	Spag6l/Kif27/Myh10/Nme5/Ulk4/Bbs1
MG specific, Age reduced	GO:0086091	regulation of heart rate by cardiac conduction	'6/689	32/20565	0.000595477	0.0112199	0.00897946	6	Dsg2/Cacna2d1/Dsp/Kcnh2/Pkp2/Jup
MG specific, Age reduced	GO:0014909	smooth muscle cell migration	'10/689	86/20565	0.000596332	0.0112199	0.00897946	10	Bmpr1a/Smo/Pdgfd/Nox4/Ppargc1a/Slit2/Ddr1/Has2/Ace/Rapgef4
MG specific, Age reduced	GO:0090184	positive regulation of kidney development	'7/689	44/20565	0.000598249	0.0112199	0.00897946	7	Smo/Pdgfd/Wnt2b/Maged1/Lgr4/Six4/Bmp4
MG specific, Age reduced	GO:0003206	cardiac chamber morphogenesis	'13/689	135/20565	0.000617348	0.0114335	0.00915044	13	Bmpr1a/Smo/Lrp2/Wnt5a/Fgfr2/Dsp/Smarcd3/Fgfrl1/Pkp2/Bmp4/Fhl2/Msx2/Hey2
MG specific, Age reduced	GO:0030879	mammary gland development	'13/689	135/20565	0.000617348	0.0114335	0.00915044	13	Smo/Tgfb3/Irs1/Slc12a2/Wnt5a/Fgfr2/Msx1/Slit2/Ddr1/Pthlh/Bmp4/Msx2/Fgf2
MG specific, Age reduced	GO:0050806	positive regulation of synaptic transmission	'15/689	170/20565	0.000617954	0.0114335	0.00915044	15	Syt12/Htr2c/Abat/Nat8l/Prnp/Lgi1/Ntrk2/Car2/Adora1/Mpp2/Dlg4/Unc13b/Snca/Arc/Shank2
MG specific, Age reduced	GO:0060411	cardiac septum morphogenesis	'9/689	72/20565	0.000652519	0.011992	0.00959737	9	Bmpr1a/Smo/Lrp2/Wnt5a/Fgfr2/Fgfrl1/Bmp4/Msx2/Hey2
MG specific, Age reduced	GO:0021761	limbic system development	'10/689	87/20565	0.000653949	0.011992	0.00959737	10	Smo/Emx2/Cntnap2/Lmx1a/Fgfr2/Tmem108/Mfsd2a/Aldh1a3/Lrp8/Bbs1
MG specific, Age reduced	GO:0060443	mammary gland morphogenesis	'8/689	58/20565	0.000665416	0.0121483	0.00972246	8	Slc12a2/Wnt5a/Fgfr2/Slit2/Ddr1/Pthlh/Bmp4/Msx2
MG specific, Age reduced	GO:0038065	collagen-activated signaling pathway	'4/689	13/20565	0.000701288	0.0126354	0.0101123	4	Ddr2/Col4a5/Col4a3/Ddr1
MG specific, Age reduced	GO:0060601	lateral sprouting from an epithelium	'4/689	13/20565	0.000701288	0.0126354	0.0101123	4	Sulf1/Wnt5a/Fgfr2/Bmp4
MG specific, Age reduced	GO:0098911	regulation of ventricular cardiac muscle cell action potential	'4/689	13/20565	0.000701288	0.0126354	0.0101123	4	Dsg2/Dsp/Pkp2/Jup
MG specific, Age reduced	GO:0010594	regulation of endothelial cell migration	'12/689	120/20565	0.000706144	0.0126676	0.0101381	12	Emp2/Vegfc/Angpt4/Amot/Dcn/Wnt5a/Stard13/Slit2/Ccr5/Bmp4/Atoh8/Fgf2
MG specific, Age reduced	GO:0060976	coronary vasculature development	'9/689	73/20565	0.000722563	0.012906	0.0103289	9	Lrp2/Myh10/Ptk7/Fgfr2/Ace/Adamts6/Bmp4/Hey2/Fgf2
MG specific, Age reduced	GO:2000147	positive regulation of cell motility	'30/689	476/20565	0.000747074	0.0132863	0.0106333	30	Lbp/Acta2/Smo/Enpp2/Pdgfd/Ddr2/Nox4/Vegfc/Lamb1/Cx3cl1/Angpt4/Irs1/Ccl20/Amot/Wnt5a/Mmp3/Madcam1/Has2/Bdkrb1/Pdgfc/Rapgef4/Itga3/Ccr5/Bmp4/Lamc2/Tcaf2/Pdpn/Atoh8/Cemip/Fgf2
MG specific, Age reduced	GO:0050679	positive regulation of epithelial cell proliferation	'15/689	174/20565	0.000786679	0.0139306	0.0111489	15	Bmpr1a/Smo/Cyp7b1/Sfrp1/Cxadr/Vegfc/Id1/Cdh3/Wnt5a/Fgfr2/Has2/Bmp4/Gas1/Stxbp4/Fgf2
MG specific, Age reduced	GO:0051588	regulation of neurotransmitter transport	'9/689	74/20565	0.000798617	0.0140816	0.0112697	9	Syt12/Htr2c/Nat8l/Grm8/Ntrk2/Pfn2/Unc13b/Snca/Prepl
MG specific, Age reduced	GO:0003007	heart morphogenesis	'19/689	250/20565	0.000806572	0.0141613	0.0113336	19	Bmpr1a/Smo/Folr1/Lrp2/Ccdc39/Mylk2/Wnt5a/Fgfr2/Msx1/Dsp/Smarcd3/Fgfrl1/Col5a1/Has2/Pkp2/Bmp4/Fhl2/Msx2/Hey2
MG specific, Age reduced	GO:0072073	kidney epithelium development	'13/689	139/20565	0.00081338	0.0141711	0.0113413	13	Smo/Bdnf/Sfrp1/Crlf1/Wnt2b/Maged1/Fgfr2/Slit2/Gdf11/Lgr4/Six4/Bmp4/Fgf2
MG specific, Age reduced	GO:0042692	muscle cell differentiation	'27/689	414/20565	0.000813996	0.0141711	0.0113413	27	Smo/Bdnf/Cxadr/Igf2/Wisp1/Nox4/Ankrd23/Rbpms2/Cdon/Mylk2/Cdh2/Myh10/Fgfr2/Msx1/Smarcd3/Nek5/Sorbs2/Ins2/Six4/Obsl1/Lmod1/Bmp4/Fhl2/Mybph/Olfm2/Hey2/Flnc
MG specific, Age reduced	GO:0000226	microtubule cytoskeleton organization	'30/689	479/20565	0.000825904	0.014318	0.0114589	30	Spag6l/Drc1/Slc39a12/Hook1/Map2/Rsph1/Gnai1/Rsph4a/Ccdc39/Map9/Brsk1/Iqcg/Dnal1/Mark1/Spef2/Ccdc114/Bicd1/Dixdc1/Rsph9/Ulk4/Pard3/Dnaic1/Ezr/Cgn/Snca/Cryab/Map6/Ttll5/Bbs1/Tppp3
MG specific, Age reduced	GO:0003416	endochondral bone growth	'5/689	23/20565	0.00084732	0.0146278	0.0117069	5	Thbs3/Ddr2/Nppc/Evc/Msx2
MG specific, Age reduced	GO:0048660	regulation of smooth muscle cell proliferation	'13/689	140/20565	0.00086982	0.0149537	0.0119677	13	Bmpr1a/Npr3/Ace2/Pdgfd/Wisp1/Tgfb3/Cx3cl1/Ppargc1a/Fgfr2/Ndrg2/Cnn1/Bmp4/Fgf2
MG specific, Age reduced	GO:0042060	wound healing	'24/689	353/20565	0.000881263	0.0150845	0.0120724	24	Acta2/Myl9/Tyro3/Cxadr/Pdgfd/Fzd6/Abat/Kank1/Cx3cl1/Lox/Ajuba/Myh10/Anxa8/Wnt5a/Ptk7/Col5a1/Ddr1/Ins2/Pard3/Pdgfc/Msx2/Pdpn/P2rx5/Fgf2
MG specific, Age reduced	GO:0050770	regulation of axonogenesis	'15/689	176/20565	0.000884744	0.0150845	0.0120724	15	Bdnf/Plxnb1/Map2/Cdh2/Wnt5a/Ntrk2/Slit2/Myo5b/Dixdc1/Mgll/Ccr5/Cdkl5/Tubb2b/Crabp2/Chn1
MG specific, Age reduced	GO:0050890	cognition	'21/689	292/20565	0.000896691	0.0152253	0.0121851	21	Cyp7b1/Bdnf/Ppp1r1b/Ncam1/Igf2/Prnp/Cntnap2/Bace1/Lamb1/Lmx1a/Rcan2/Bhlhb9/Ntrk2/Atp1a2/Adora1/Rin1/Pde5a/Itga3/Shank2/Aff2/Apbb1
MG specific, Age reduced	GO:0045860	positive regulation of protein kinase activity	'27/689	418/20565	0.000939056	0.0158145	0.0126566	27	Chil1/Vldlr/Pdgfd/Clu/Ddr2/Nox4/Tgfb3/Emp2/Prnp/Stk39/Ajuba/Maged1/Tpd52l1/Wnt5a/Plce1/Adora1/Dok7/Ins2/Pde5a/Pdgfc/Ace/Bmp4/Snca/Cemip/Lrp8/Fgf2/5730559C18Rik
MG specific, Age reduced	GO:0060537	muscle tissue development	'27/689	418/20565	0.000939056	0.0158145	0.0126566	27	Bmpr1a/Smo/Bdnf/Cxadr/Ncam1/Eln/Lrp2/Wisp1/Nox4/Plagl1/Dsg2/Cdon/Mylk2/Ppargc1a/Myh10/Wnt5a/Fgfr2/Dsp/Sorbs2/Scx/Six4/Pkp2/Bmp4/Fhl2/Hey2/Tenm4/Fgf2
MG specific, Age reduced	GO:0007288	sperm axoneme assembly	'4/689	14/20565	0.000955901	0.0159678	0.0127793	4	Spag6l/Iqcg/Spef2/Ttll5
MG specific, Age reduced	GO:1901213	regulation of transcription from RNA polymerase II promoter involved in heart development	'4/689	14/20565	0.000955901	0.0159678	0.0127793	4	Bmpr1a/Msx1/Bmp4/Msx2
MG specific, Age reduced	GO:0060071	Wnt signaling pathway, planar cell polarity pathway	'6/689	35/20565	0.000979492	0.0162959	0.0130419	6	Sfrp1/Cthrc1/Fzd6/Wnt5a/Ptk7/Fzd3
MG specific, Age reduced	GO:0034767	positive regulation of ion transmembrane transport	'13/689	142/20565	0.000992591	0.0164475	0.0131632	13	Fxyd1/Stk39/Cacna2d1/Tcaf1/Atp1b1/Bdkrb1/Kcnh2/Acsl6/Bmp4/Snca/Trpc1/Arc/Cemip
MG specific, Age reduced	GO:0042476	odontogenesis	'11/689	108/20565	0.000999278	0.0164921	0.0131989	11	Bmpr1a/Smo/Perp/Tnfrsf11b/Lamb1/Fgfr2/Msx1/Bmp4/Msx2/Odaph/Gas1
MG specific, Age reduced	GO:0014706	striated muscle tissue development	'26/689	399/20565	0.00102087	0.0167656	0.0134178	26	Bmpr1a/Smo/Bdnf/Cxadr/Ncam1/Eln/Lrp2/Wisp1/Nox4/Plagl1/Dsg2/Cdon/Mylk2/Myh10/Wnt5a/Fgfr2/Dsp/Sorbs2/Scx/Six4/Pkp2/Bmp4/Fhl2/Hey2/Tenm4/Fgf2
MG specific, Age reduced	GO:0048701	embryonic cranial skeleton morphogenesis	'7/689	48/20565	0.00102398	0.0167656	0.0134178	7	Prrx1/Tgfb3/Rdh10/Fgfr2/Six4/Bmp4/Gas1
MG specific, Age reduced	GO:0046928	regulation of neurotransmitter secretion	'8/689	62/20565	0.00104402	0.0169591	0.0135726	8	Syt12/Htr2c/Grm8/Ntrk2/Pfn2/Unc13b/Snca/Prepl
MG specific, Age reduced	GO:2000179	positive regulation of neural precursor cell proliferation	'8/689	62/20565	0.00104402	0.0169591	0.0135726	8	Smo/Lrp2/Vegfc/Cdon/Cx3cl1/Smarcd3/Fzd3/Fgf2
MG specific, Age reduced	GO:1901863	positive regulation of muscle tissue development	'9/689	77/20565	0.0010667	0.0172596	0.0138131	9	Bmpr1a/Ncam1/Wisp1/Cdon/Ppargc1a/Fgfr2/Bmp4/Hey2/Fgf2
MG specific, Age reduced	GO:0042472	inner ear morphogenesis	'11/689	109/20565	0.00107857	0.0173835	0.0139123	11	Cthrc1/Prrx1/Fzd6/Otx2/Wnt5a/Ptk7/Fgfr2/Lrig1/Six4/Fzd3/Aldh1a3
MG specific, Age reduced	GO:0017157	regulation of exocytosis	'15/689	180/20565	0.00111216	0.0177859	0.0142343	15	Syt12/Ncam1/Sytl3/Sept5/Myo5b/Llgl2/Pfn2/Tmem27/Rapgef4/Syt17/Unc13b/Snca/Syt9/Prepl/Rab15
MG specific, Age reduced	GO:0048754	branching morphogenesis of an epithelial tube	'15/689	180/20565	0.00111216	0.0177859	0.0142343	15	Smo/Tnc/Wnt2b/Rdh10/Maged1/Slc12a2/Wnt5a/Fgfr2/Slit2/Lgr4/Ddr1/Six4/Bmp4/Msx2/Fgf2
MG specific, Age reduced	GO:0010092	specification of animal organ identity	'6/689	36/20565	0.00114252	0.0179424	0.0143596	6	Lrp2/Wnt2b/Fgfr2/Smarcd3/Bmp4/Fgf2
MG specific, Age reduced	GO:0040019	positive regulation of embryonic development	'6/689	36/20565	0.00114252	0.0179424	0.0143596	6	Otx2/Wnt2b/Amot/Scx/Six4/Tenm4
MG specific, Age reduced	GO:0086004	regulation of cardiac muscle cell contraction	'6/689	36/20565	0.00114252	0.0179424	0.0143596	6	Fxyd1/Dsg2/Atp1a2/Dsp/Pkp2/Jup
MG specific, Age reduced	GO:1902692	regulation of neuroblast proliferation	'6/689	36/20565	0.00114252	0.0179424	0.0143596	6	Smo/Bdnf/Vegfc/Cx3cl1/Smarcd3/Fzd3
MG specific, Age reduced	GO:0044089	positive regulation of cellular component biogenesis	'30/689	489/20565	0.00114369	0.0179424	0.0143596	30	Enpp2/Gpm6a/Bdnf/Ace2/Clu/Ppm1e/Nox4/Tgfb3/Snap91/Baiap2l1/Mns1/Id1/Ajuba/Bhlhb9/Ntrk2/Mmp3/Hip1r/Myo5b/Pfn2/Ptprd/Cldn1/Cobl/Kirrel/Il1rap/Lmod1/Tmem27/Eps8l2/Unc13b/Nphp1/Gm14137
MG specific, Age reduced	GO:0043297	apical junction assembly	'7/689	49/20565	0.00116065	0.0180032	0.0144083	7	Ocln/Cldn1/Pard3/Pkp2/Cgn/Cldn3/Nphp1
MG specific, Age reduced	GO:0050775	positive regulation of dendrite morphogenesis	'7/689	49/20565	0.00116065	0.0180032	0.0144083	7	Bhlhb9/Myo5b/Akap5/Ptprd/Cdkl5/Lrp8/Ptprf
MG specific, Age reduced	GO:0055025	positive regulation of cardiac muscle tissue development	'7/689	49/20565	0.00116065	0.0180032	0.0144083	7	Bmpr1a/Ncam1/Wisp1/Fgfr2/Bmp4/Hey2/Fgf2
MG specific, Age reduced	GO:0048659	smooth muscle cell proliferation	'13/689	145/20565	0.00120371	0.0185317	0.0148312	13	Bmpr1a/Npr3/Ace2/Pdgfd/Wisp1/Tgfb3/Cx3cl1/Ppargc1a/Fgfr2/Ndrg2/Cnn1/Bmp4/Fgf2
MG specific, Age reduced	GO:0060041	retina development in camera-type eye	'13/689	145/20565	0.00120371	0.0185317	0.0148312	13	Gpm6a/Mfrp/Cdon/Myh10/Ntrk2/Megf11/Smarcd3/Slc4a5/Ttll5/Arl6/Rpgr/Nphp1/Ttc8
MG specific, Age reduced	GO:0060045	positive regulation of cardiac muscle cell proliferation	'5/689	25/20565	0.00126581	0.0191814	0.0153512	5	Bmpr1a/Ncam1/Fgfr2/Hey2/Fgf2
MG specific, Age reduced	GO:0086005	ventricular cardiac muscle cell action potential	'5/689	25/20565	0.00126581	0.0191814	0.0153512	5	Dsg2/Dsp/Kcnh2/Pkp2/Jup
MG specific, Age reduced	GO:0098868	bone growth	'5/689	25/20565	0.00126581	0.0191814	0.0153512	5	Thbs3/Ddr2/Nppc/Evc/Msx2
MG specific, Age reduced	GO:0098901	regulation of cardiac muscle cell action potential	'5/689	25/20565	0.00126581	0.0191814	0.0153512	5	Cxadr/Dsg2/Dsp/Pkp2/Jup
MG specific, Age reduced	GO:0061430	bone trabecula morphogenesis	'4/689	15/20565	0.00126915	0.0191814	0.0153512	4	Sfrp1/Plxnb1/Thbs3/Msx2
MG specific, Age reduced	GO:0014910	regulation of smooth muscle cell migration	'9/689	79/20565	0.00128278	0.0193166	0.0154594	9	Bmpr1a/Smo/Pdgfd/Nox4/Ppargc1a/Slit2/Has2/Ace/Rapgef4
MG specific, Age reduced	GO:0007405	neuroblast proliferation	'8/689	64/20565	0.00128908	0.0193408	0.0154788	8	Smo/Bdnf/Vegfc/Cx3cl1/Fgfr2/Smarcd3/Acsl6/Fzd3
MG specific, Age reduced	GO:0009798	axis specification	'10/689	95/20565	0.0013011	0.0194505	0.0155666	10	Bmpr1a/Smo/Sfrp1/Otx2/Mns1/Wnt5a/Cobl/Bmp4/Hey2/Ttc8
MG specific, Age reduced	GO:0055023	positive regulation of cardiac muscle tissue growth	'6/689	37/20565	0.00132555	0.0195329	0.0156325	6	Bmpr1a/Ncam1/Wisp1/Fgfr2/Hey2/Fgf2
MG specific, Age reduced	GO:0086065	cell communication involved in cardiac conduction	'6/689	37/20565	0.00132555	0.0195329	0.0156325	6	Cxadr/Dsg2/Cacna2d1/Dsp/Pkp2/Jup
MG specific, Age reduced	GO:0090175	regulation of establishment of planar polarity	'6/689	37/20565	0.00132555	0.0195329	0.0156325	6	Sfrp1/Cthrc1/Fzd6/Wnt5a/Ptk7/Fzd3
MG specific, Age reduced	GO:1905332	positive regulation of morphogenesis of an epithelium	'6/689	37/20565	0.00132555	0.0195329	0.0156325	6	Smo/Wnt2b/Maged1/Lgr4/Six4/Bmp4
MG specific, Age reduced	GO:0099003	vesicle-mediated transport in synapse	'12/689	129/20565	0.00133511	0.0196038	0.0156892	12	Syt12/Snap91/Sytl3/Mylk2/Arhgap44/Fgfr2/Pfn2/Syt17/Unc13b/Snca/Syt9/Prepl
MG specific, Age reduced	GO:0008016	regulation of heart contraction	'14/689	165/20565	0.00135326	0.0197298	0.0157901	14	Cxadr/Ace2/Fxyd1/Dsg2/Cacna2d1/Atp1a2/Adora1/Dsp/Atp1b1/Pde5a/Kcnh2/Pkp2/Jup/Hey2
MG specific, Age reduced	GO:0055002	striated muscle cell development	'14/689	165/20565	0.00135326	0.0197298	0.0157901	14	Smo/Cxadr/Wisp1/Ankrd23/Myh10/Sorbs2/Six4/Obsl1/Lmod1/Bmp4/Fhl2/Mybph/Hey2/Flnc
MG specific, Age reduced	GO:1901699	cellular response to nitrogen compound	'30/689	495/20565	0.00138157	0.0200717	0.0160637	30	Col5a2/Folr1/Sfrp1/Pdgfd/Igf2/Prnp/Kank1/Kl/Baiap2l1/Grb14/Irs1/Cacna2d1/Gpd1/Pik3r3/Itpr1/Ntrk2/Car2/Mmp3/Sesn3/Slit2/Aplp1/Ins2/Pdgfc/Dnaic1/Ezr/Bmp4/Jup/Stxbp4/Ptprf/Raet1c
MG specific, Age reduced	GO:0002062	chondrocyte differentiation	'10/689	96/20565	0.00140978	0.0204096	0.0163342	10	Bmpr1a/Sulf1/Efemp1/Nppc/Ift80/Scx/Pthlh/Bmp4/Msx2/Rflnb
MG specific, Age reduced	GO:0001558	regulation of cell growth	'25/689	387/20565	0.00142564	0.0205672	0.0164602	25	Wisp2/Bdnf/Sfrp1/Igfbp2/Wisp1/Fhl1/Lmx1a/Igfbpl1/Lgi1/Wnt5a/Msx1/Slit2/Myo5b/Ddr1/Bdkrb1/Hrasls/Syt17/Mgll/Ccr5/Cdkl5/Cryab/Gas1/Taf9b/Apbb1/Crabp2
MG specific, Age reduced	GO:1903522	regulation of blood circulation	'17/689	223/20565	0.00143857	0.0206813	0.0165515	17	Htr2c/Cxadr/Ace2/Fxyd1/Dsg2/Cx3cl1/Cacna2d1/Atp1a2/Adora1/Dsp/Atp1b1/Pde5a/Arhgap42/Kcnh2/Pkp2/Jup/Hey2
MG specific, Age reduced	GO:0086001	cardiac muscle cell action potential	'7/689	51/20565	0.00147664	0.0211549	0.0169306	7	Cxadr/Dsg2/Cacna2d1/Dsp/Kcnh2/Pkp2/Jup
MG specific, Age reduced	GO:0018108	peptidyl-tyrosine phosphorylation	'21/689	304/20565	0.00148311	0.0211741	0.0169459	21	Enpp2/Cntn1/Sfrp1/Pdgfd/Igf2/Ddr2/Efemp1/Crlf1/Vegfc/Prnp/Angpt4/Fgfr2/Adora1/Dyrk3/Dok7/Ddr1/Ins2/Pdgfc/Ace/Frk/Lrp8
MG specific, Age reduced	GO:0072089	stem cell proliferation	'12/689	131/20565	0.00152443	0.0215408	0.0172394	12	Smo/Bdnf/Vegfc/Cx3cl1/Wnt2b/Wnt5a/Fgfr2/Smarcd3/Acsl6/Ace/Fzd3/Bmp4
MG specific, Age reduced	GO:0002052	positive regulation of neuroblast proliferation	'5/689	26/20565	0.00152446	0.0215408	0.0172394	5	Smo/Vegfc/Cx3cl1/Smarcd3/Fzd3
MG specific, Age reduced	GO:0060914	heart formation	'5/689	26/20565	0.00152446	0.0215408	0.0172394	5	Bmpr1a/Folr1/Lrp2/Smarcd3/Bmp4
MG specific, Age reduced	GO:1901342	regulation of vasculature development	'19/689	264/20565	0.00153062	0.021554	0.01725	19	Enpp2/Chil1/Sulf1/Pdgfd/Hspb6/Col4a3/Emp2/Vegfc/Cx3cl1/Angpt4/Id1/Amot/Dcn/Wnt5a/Stard13/Ccr5/Bmp4/Hey2/Fgf2
MG specific, Age reduced	GO:1902903	regulation of supramolecular fiber organization	'21/689	306/20565	0.00160732	0.0225571	0.0180528	21	Slc39a12/Map2/Clu/Ppm1e/Eln/Nox4/Tgfb3/Ankrd23/Kank1/Baiap2l1/Id1/Hip1r/Slit2/Pfn2/Kirrel/Lmod1/Snca/Cryab/Plekhg2/Ttc8/Gm14137
MG specific, Age reduced	GO:0061572	actin filament bundle organization	'13/689	150/20565	0.00163819	0.0227121	0.0181768	13	Ppm1e/Eln/Cald1/Nox4/Tgfb3/Baiap2l1/Id1/Myh10/Pfn2/Ezr/Pls1/Rflnb/Ttc8
MG specific, Age reduced	GO:0090177	establishment of planar polarity involved in neural tube closure	'4/689	16/20565	0.00164767	0.0227121	0.0181768	4	Sfrp1/Cthrc1/Wnt5a/Ptk7
MG specific, Age reduced	GO:0097094	craniofacial suture morphogenesis	'4/689	16/20565	0.00164767	0.0227121	0.0181768	4	Frem1/Fgfr2/Bmp4/Msx2
MG specific, Age reduced	GO:0140115	export across plasma membrane	'4/689	16/20565	0.00164767	0.0227121	0.0181768	4	Fxyd1/Atp1a2/Atp1b1/Kcnh2
MG specific, Age reduced	GO:1900006	positive regulation of dendrite development	'10/689	98/20565	0.00164928	0.0227121	0.0181768	10	Vldlr/Bhlhb9/Myo5b/Akap5/Ptprd/Cobl/Il1rap/Cdkl5/Lrp8/Ptprf
MG specific, Age reduced	GO:0030850	prostate gland development	'7/689	52/20565	0.00165788	0.0227121	0.0181768	7	Cyp7b1/Sulf1/Sfrp1/Tnc/Wnt5a/Fgfr2/Bmp4
MG specific, Age reduced	GO:0010634	positive regulation of epithelial cell migration	'11/689	115/20565	0.00167068	0.0227121	0.0181768	11	Enpp2/Vegfc/Angpt4/Amot/Wnt5a/Has2/Itga3/Ccr5/Bmp4/Atoh8/Fgf2
MG specific, Age reduced	GO:0097061	dendritic spine organization	'9/689	82/20565	0.00167174	0.0227121	0.0181768	9	Prnp/Arhgap44/Bhlhb9/Myo5b/Ins2/Itga3/Dlg4/Arc/Lrp8
MG specific, Age reduced	GO:0018212	peptidyl-tyrosine modification	'21/689	307/20565	0.00167268	0.0227121	0.0181768	21	Enpp2/Cntn1/Sfrp1/Pdgfd/Igf2/Ddr2/Efemp1/Crlf1/Vegfc/Prnp/Angpt4/Fgfr2/Adora1/Dyrk3/Dok7/Ddr1/Ins2/Pdgfc/Ace/Frk/Lrp8
MG specific, Age reduced	GO:0060627	regulation of vesicle-mediated transport	'29/689	479/20565	0.00167341	0.0227121	0.0181768	29	Rab4a/Lbp/Ptx3/Syt12/Clu/Ncam1/Snap91/Sytl3/Sept5/Pacsin3/Wnt5a/Hip1r/Myo5b/Llgl2/Bicd1/Pfn2/Stxbp6/Pard3/Tmem27/Rapgef4/Dlg4/Syt17/Unc13b/Ezr/Snca/Syt9/Gas1/Prepl/Rab15
MG specific, Age reduced	GO:0001764	neuron migration	'14/689	169/20565	0.00169883	0.0229065	0.0183324	14	Gpm6a/Matn2/Ndn/Dclk1/Myh10/Ntrk2/Mark1/Ulk4/Itga3/Fzd3/Cdkl5/Tubb2b/Bbs1/Apbb1
MG specific, Age reduced	GO:0007266	Rho protein signal transduction	'14/689	169/20565	0.00169883	0.0229065	0.0183324	14	Ctnnal1/Kank1/Cdh2/Fgd1/Arhgap42/Lpar4/Arhgef17/Eps8l2/Itga3/Arhgef18/Arhgef25/Pdpn/Plekhg2/Gm14137
MG specific, Age reduced	GO:0060070	canonical Wnt signaling pathway	'18/689	247/20565	0.0017528	0.0235571	0.0188532	18	Folr1/Sfrp1/Cthrc1/Fzd6/Lmx1a/Wnt2b/Cdh2/Cdh3/Wnt5a/Ptk7/Fgfr2/Amer2/Lgr4/Dixdc1/Ptpru/Ins2/Fzd3/Fgf2
MG specific, Age reduced	GO:0048675	axon extension	'11/689	116/20565	0.00179124	0.0239956	0.0192041	11	Smo/Bdnf/Plxnb1/Ndn/Dclk1/Wnt5a/Slit2/Myo5b/Mgll/Ccr5/Cdkl5
MG specific, Age reduced	GO:0003148	outflow tract septum morphogenesis	'5/689	27/20565	0.00181995	0.0241451	0.0193237	5	Bmpr1a/Lrp2/Fgfr2/Bmp4/Msx2
MG specific, Age reduced	GO:0051150	regulation of smooth muscle cell differentiation	'5/689	27/20565	0.00181995	0.0241451	0.0193237	5	Rbpms2/Fgfr2/Smarcd3/Bmp4/Olfm2
MG specific, Age reduced	GO:0060343	trabecula formation	'5/689	27/20565	0.00181995	0.0241451	0.0193237	5	Sfrp1/Thbs3/Fhl2/Msx2/Hey2
MG specific, Age reduced	GO:0035637	multicellular organismal signaling	'12/689	134/20565	0.00184947	0.0242329	0.019394	12	Cxadr/Ace2/Dsg2/Cacna2d1/Dsp/Cacng7/Nfasc/Kcnh2/Rapgef4/Pkp2/Jup/P2rx5
MG specific, Age reduced	GO:0035567	non-canonical Wnt signaling pathway	'7/689	53/20565	0.00185594	0.0242329	0.019394	7	Sfrp1/Cthrc1/Fzd6/Wnt5a/Ptk7/Ift80/Fzd3
MG specific, Age reduced	GO:0046622	positive regulation of organ growth	'7/689	53/20565	0.00185594	0.0242329	0.019394	7	Bmpr1a/Smo/Ncam1/Wisp1/Fgfr2/Hey2/Fgf2
MG specific, Age reduced	GO:0048678	response to axon injury	'7/689	53/20565	0.00185594	0.0242329	0.019394	7	Folr1/Matn2/Tnc/Rtn4rl1/Morn4/Ptprf/Fgf2
MG specific, Age reduced	GO:0061383	trabecula morphogenesis	'7/689	53/20565	0.00185594	0.0242329	0.019394	7	Bmpr1a/Sfrp1/Plxnb1/Thbs3/Fhl2/Msx2/Hey2
MG specific, Age reduced	GO:0048167	regulation of synaptic plasticity	'15/689	190/20565	0.00190453	0.0247889	0.019839	15	Syt12/Bdnf/Prnp/Bace1/Mylk2/Ntrk2/Adora1/Mpp2/Rin1/Dlg4/Mgll/Unc13b/Snca/Arc/Shank2
MG specific, Age reduced	GO:0097479	synaptic vesicle localization	'12/689	135/20565	0.00196968	0.0255563	0.0204531	12	Syt12/Snap91/Sytl3/Mylk2/Cdh2/Fgfr2/Pfn2/Syt17/Unc13b/Snca/Syt9/Prepl
MG specific, Age reduced	GO:0060421	positive regulation of heart growth	'6/689	40/20565	0.00201041	0.0259217	0.0207456	6	Bmpr1a/Ncam1/Wisp1/Fgfr2/Hey2/Fgf2
MG specific, Age reduced	GO:0086002	cardiac muscle cell action potential involved in contraction	'6/689	40/20565	0.00201041	0.0259217	0.0207456	6	Dsg2/Cacna2d1/Dsp/Kcnh2/Pkp2/Jup
MG specific, Age reduced	GO:0006865	amino acid transport	'12/689	136/20565	0.00209622	0.0267995	0.0214481	12	Slc6a14/Bdnf/Htr2c/Ace2/Abat/Stk39/Ntrk2/Slc6a17/Slc6a20a/Adora1/Tmem27/Snca
MG specific, Age reduced	GO:0035089	establishment of apical/basal cell polarity	'4/689	17/20565	0.002098	0.0267995	0.0214481	4	Foxj1/Wnt5a/Ptk7/Crb3
MG specific, Age reduced	GO:0048268	clathrin coat assembly	'4/689	17/20565	0.002098	0.0267995	0.0214481	4	Nsg2/Snap91/Hip1r/Nsg1
MG specific, Age reduced	GO:0017158	regulation of calcium ion-dependent exocytosis	'8/689	69/20565	0.00210447	0.0267995	0.0214481	8	Syt12/Sytl3/Pfn2/Tmem27/Syt17/Unc13b/Syt9/Prepl
MG specific, Age reduced	GO:0043254	regulation of protein complex assembly	'24/689	377/20565	0.00213097	0.0270535	0.0216513	24	Slc39a12/Clu/Ncam1/Eln/Snap91/Kank1/Baiap2l1/Ajuba/Mmp3/Hip1r/Slit2/Pfn2/Ins2/Stxbp6/Kirrel/Lmod1/Tmem27/Unc13b/Snca/Cryab/Hey2/Plekhg2/Kif9/Gm14137
MG specific, Age reduced	GO:0001656	metanephros development	'9/689	85/20565	0.00214994	0.0271274	0.0217105	9	Smo/Fras1/Fbn1/Rdh10/Slit2/Gdf11/Lgr4/Six4/Bmp4
MG specific, Age reduced	GO:0106027	neuron projection organization	'9/689	85/20565	0.00214994	0.0271274	0.0217105	9	Prnp/Arhgap44/Bhlhb9/Myo5b/Ins2/Itga3/Dlg4/Arc/Lrp8
MG specific, Age reduced	GO:0097756	negative regulation of blood vessel diameter	'10/689	102/20565	0.0022271	0.0279796	0.0223925	10	Acta2/Htr2c/Cx3cl1/Atp1a2/Adora1/Wdr35/Pde5a/Arhgap42/Ace/Mgll
MG specific, Age reduced	GO:0090150	establishment of protein localization to membrane	'14/689	174/20565	0.00223104	0.0279796	0.0223925	14	Folr1/Reep2/Krt18/Prnp/Arhgap44/Dusp18/Adora1/Tcaf1/Pard3/Tcaf2/Nsg1/Cemip/Bbs1/Arl6
MG specific, Age reduced	GO:0030111	regulation of Wnt signaling pathway	'18/689	253/20565	0.00227948	0.0284233	0.0227476	18	Folr1/Sulf1/Sfrp1/Cthrc1/Fzd6/Kank1/Nxn/Lmx1a/Wnt2b/Cdh2/Wnt5a/Fgfr2/Ift80/Amer2/Lgr4/Dixdc1/Itga3/Fgf2
MG specific, Age reduced	GO:0007517	muscle organ development	'24/689	379/20565	0.0022827	0.0284233	0.0227476	24	Bmpr1a/Smo/Bdnf/Cxadr/Ncam1/Eln/Lrp2/Wisp1/Plagl1/Cdon/Mylk2/Wnt5a/Fgfr2/Msx1/Dsp/Fgfrl1/Scx/Six4/Pkp2/Bmp4/Cryab/Jph1/Hey2/Fgf2
MG specific, Age reduced	GO:0060038	cardiac muscle cell proliferation	'7/689	55/20565	0.0023067	0.0284233	0.0227476	7	Bmpr1a/Cxadr/Ncam1/Fgfr2/Hey2/Tenm4/Fgf2
MG specific, Age reduced	GO:0098900	regulation of action potential	'7/689	55/20565	0.0023067	0.0284233	0.0227476	7	Cxadr/Dsg2/Cacna2d1/Dsp/Rapgef4/Pkp2/Jup
MG specific, Age reduced	GO:0046530	photoreceptor cell differentiation	'8/689	70/20565	0.00230776	0.0284233	0.0227476	8	Mfrp/Otx2/Ntrk2/Ttc26/Bbs1/Rpgr/Nphp1/Ttc8
MG specific, Age reduced	GO:0055008	cardiac muscle tissue morphogenesis	'8/689	70/20565	0.00230776	0.0284233	0.0227476	8	Bmpr1a/Lrp2/Mylk2/Wnt5a/Fgfr2/Dsp/Pkp2/Hey2
MG specific, Age reduced	GO:0032963	collagen metabolic process	'9/689	86/20565	0.00233154	0.0284613	0.022778	9	Tgfb3/P3h4/Id1/Mmp3/Col5a1/Scx/Mrc2/Bmp4/Mmp11
MG specific, Age reduced	GO:0055017	cardiac muscle tissue growth	'9/689	86/20565	0.00233154	0.0284613	0.022778	9	Bmpr1a/Cxadr/Ncam1/Wisp1/Fgfr2/Sorbs2/Hey2/Tenm4/Fgf2
MG specific, Age reduced	GO:0099565	chemical synaptic transmission, postsynaptic	'9/689	86/20565	0.00233154	0.0284613	0.022778	9	Bdnf/Abat/Cx3cl1/Adora1/Mpp2/Tmem108/Dlg4/Unc13b/Snca
MG specific, Age reduced	GO:0099504	synaptic vesicle cycle	'11/689	120/20565	0.00234645	0.0285589	0.0228561	11	Syt12/Snap91/Sytl3/Cdh2/Pfn2/Syt17/Unc13b/Snca/Syt9/Clcn3/Prepl
MG specific, Age reduced	GO:0072006	nephron development	'12/689	138/20565	0.00236925	0.0287516	0.0230104	12	Smo/Sulf1/Pdgfd/Col4a3/Wnt2b/Maged1/Plce1/Lgr4/Six4/Itga3/Bmp4/Fgf2
MG specific, Age reduced	GO:0090101	negative regulation of transmembrane receptor protein serine/threonine kinase signaling pathway	'10/689	103/20565	0.00239438	0.0289713	0.0231862	10	Sfrp1/Lrp2/Fbn1/Fstl3/Tgfb3/Wnt5a/Rasl11b/Prdm16/Peg10/Vasn
MG specific, Age reduced	GO:0048639	positive regulation of developmental growth	'15/689	195/20565	0.00245047	0.0295633	0.02366	15	Bmpr1a/Smo/Bdnf/Ncam1/Igf2/Wisp1/Fgfr2/Myo5b/Syt17/Ezr/Cdkl5/Pls1/Hey2/Fgf2/Crabp2
MG specific, Age reduced	GO:0048015	phosphatidylinositol-mediated signaling	'12/689	139/20565	0.00251627	0.0300368	0.024039	12	Npr3/Plxnb1/Pdgfd/Irs1/Dcn/Ntrk2/Ptpn13/Ins2/Pik3ip1/Nyap1/Pdgfc/Ezr
MG specific, Age reduced	GO:0044259	multicellular organismal macromolecule metabolic process	'9/689	87/20565	0.0025251	0.0300368	0.024039	9	Tgfb3/P3h4/Id1/Mmp3/Col5a1/Scx/Mrc2/Bmp4/Mmp11
MG specific, Age reduced	GO:1905477	positive regulation of protein localization to membrane	'9/689	87/20565	0.0025251	0.0300368	0.024039	9	Efcab7/Prnp/Myo5b/Tcaf1/Itga3/Ezr/Tcaf2/Pls1/Cemip
MG specific, Age reduced	GO:0007492	endoderm development	'8/689	71/20565	0.00252612	0.0300368	0.024039	8	Bmpr1a/Col5a2/Otx2/Angpt4/Col5a1/Pthlh/Bmp4/Arc
MG specific, Age reduced	GO:0032890	regulation of organic acid transport	'8/689	71/20565	0.00252612	0.0300368	0.024039	8	Htr2c/Fxyd1/Abat/Stk39/Adora1/Acsl6/Tmem27/Snca
MG specific, Age reduced	GO:1904377	positive regulation of protein localization to cell periphery	'7/689	56/20565	0.00256153	0.0303703	0.0243058	7	Efcab7/Gnai1/Prnp/Myo5b/Itga3/Ezr/Pls1
MG specific, Age reduced	GO:0051056	regulation of small GTPase mediated signal transduction	'17/689	236/20565	0.00261953	0.0308757	0.0247103	17	Kank1/Cdon/Amot/Cdh2/Arhgap44/Fgd1/Plce1/Slit2/Arhgap42/Lpar4/Arhgef17/Eps8l2/Itga3/Arhgef18/Arhgef25/Plekhg2/Chn1
MG specific, Age reduced	GO:0021542	dentate gyrus development	'4/689	18/20565	0.0026266	0.0308757	0.0247103	4	Smo/Emx2/Lmx1a/Tmem108
MG specific, Age reduced	GO:0042249	establishment of planar polarity of embryonic epithelium	'4/689	18/20565	0.0026266	0.0308757	0.0247103	4	Sfrp1/Cthrc1/Wnt5a/Ptk7
MG specific, Age reduced	GO:0043588	skin development	'19/689	277/20565	0.00263724	0.0309126	0.0247399	19	Smo/Col5a2/Fras1/Fzd6/Lce1g/Cdh3/Wnt5a/Fgfr2/Dsp/Lgr4/Cldn1/Col5a1/Madcam1/Itga3/Fzd3/Jup/Msx2/Cldn4/Ift74
MG specific, Age reduced	GO:0060078	regulation of postsynaptic membrane potential	'9/689	88/20565	0.00273119	0.0319233	0.0255487	9	Bdnf/Abat/Cx3cl1/Adora1/Mpp2/Tmem108/Dlg4/Unc13b/Snca
MG specific, Age reduced	GO:0010595	positive regulation of endothelial cell migration	'8/689	72/20565	0.00276032	0.0320744	0.0256697	8	Vegfc/Angpt4/Amot/Wnt5a/Ccr5/Bmp4/Atoh8/Fgf2
MG specific, Age reduced	GO:0021885	forebrain cell migration	'8/689	72/20565	0.00276032	0.0320744	0.0256697	8	Tyro3/Ccdc141/Emx2/Efhc1/Lamb1/Slit2/Dixdc1/Lrp8
MG specific, Age reduced	GO:0003002	regionalization	'23/689	363/20565	0.00276745	0.0320744	0.0256697	23	Bmpr1a/Smo/Foxj1/Sfrp1/Lrp2/Emx2/Otx2/Cdon/Mns1/Wnt2b/Wnt5a/Fgfr2/Msx1/Smarcd3/Crb2/Gdf11/Cobl/Bmp4/Msx2/Arc/Gas1/Hey2/Fgf2
MG specific, Age reduced	GO:0050673	epithelial cell proliferation	'24/689	385/20565	0.0027942	0.0322938	0.0258453	24	Bmpr1a/Smo/Cyp7b1/Sulf1/Sfrp1/Cxadr/Col8a1/Vegfc/Col8a2/Id1/Cdh3/Maged1/Wnt5a/Fgfr2/Ift80/Lgr4/Has2/Six4/Bmp4/Gas1/Atoh8/Ift74/Stxbp4/Fgf2
MG specific, Age reduced	GO:0060047	heart contraction	'15/689	198/20565	0.00283614	0.0326869	0.0261598	15	Cxadr/Ace2/Fxyd1/Dsg2/Cacna2d1/Atp1a2/Adora1/Dsp/Atp1b1/Pde5a/Kcnh2/Ace/Pkp2/Jup/Hey2
MG specific, Age reduced	GO:0035023	regulation of Rho protein signal transduction	'11/689	123/20565	0.00284822	0.0327347	0.0261981	11	Kank1/Cdh2/Fgd1/Arhgap42/Lpar4/Arhgef17/Eps8l2/Itga3/Arhgef18/Arhgef25/Plekhg2
MG specific, Age reduced	GO:0031589	cell-substrate adhesion	'20/689	300/20565	0.00286732	0.0327867	0.0262397	20	Enpp2/Epdr1/Tyro3/Sfrp1/Col8a1/Fbln2/Emp2/Vegfc/Kank1/Mia/Lamb1/Ajuba/Frem1/Smoc1/Ddr1/Madcam1/Has2/Itga3/Nid2/Pdpn
MG specific, Age reduced	GO:0090257	regulation of muscle system process	'16/689	218/20565	0.00286864	0.0327867	0.0262397	16	Ace2/Fxyd1/Cald1/Wisp1/Abat/Dsg2/Mylk2/Pde9a/Atp1a2/Adora1/Dsp/Atp1b1/Pde5a/Arhgap42/Pkp2/Jup
MG specific, Age reduced	GO:0060043	regulation of cardiac muscle cell proliferation	'6/689	43/20565	0.00293371	0.0334378	0.0267608	6	Bmpr1a/Cxadr/Ncam1/Fgfr2/Hey2/Fgf2
MG specific, Age reduced	GO:0035640	exploration behavior	'5/689	30/20565	0.00295756	0.0336168	0.0269041	5	Abat/Slc4a10/Itga3/Dlg4/Shank2
MG specific, Age reduced	GO:0048017	inositol lipid-mediated signaling	'12/689	142/20565	0.00300243	0.034033	0.0272372	12	Npr3/Plxnb1/Pdgfd/Irs1/Dcn/Ntrk2/Ptpn13/Ins2/Pik3ip1/Nyap1/Pdgfc/Ezr
MG specific, Age reduced	GO:0050678	regulation of epithelial cell proliferation	'21/689	323/20565	0.00306887	0.0346909	0.0277637	21	Bmpr1a/Smo/Cyp7b1/Sulf1/Sfrp1/Cxadr/Vegfc/Id1/Cdh3/Maged1/Wnt5a/Fgfr2/Ift80/Has2/Six4/Bmp4/Gas1/Atoh8/Ift74/Stxbp4/Fgf2
MG specific, Age reduced	GO:0002011	morphogenesis of an epithelial sheet	'7/689	58/20565	0.00313557	0.0352516	0.0282124	7	Ajuba/Wnt5a/Col5a1/Ddr1/Pard3/Msx2/Pdpn
MG specific, Age reduced	GO:0090183	regulation of kidney development	'7/689	58/20565	0.00313557	0.0352516	0.0282124	7	Smo/Pdgfd/Wnt2b/Maged1/Lgr4/Six4/Bmp4
MG specific, Age reduced	GO:0048593	camera-type eye morphogenesis	'11/689	125/20565	0.00322829	0.0360305	0.0288358	11	Col8a1/Col8a2/Cdon/Megf11/Gdf11/Fat1/Bmp4/Aldh1a3/Arl6/Rpgr/Ttc8
MG specific, Age reduced	GO:0061162	establishment of monopolar cell polarity	'4/689	19/20565	0.00323978	0.0360305	0.0288358	4	Foxj1/Wnt5a/Ptk7/Crb3
MG specific, Age reduced	GO:0097205	renal filtration	'4/689	19/20565	0.00323978	0.0360305	0.0288358	4	Sulf1/Emp2/Adora1/Itga3
MG specific, Age reduced	GO:1905276	regulation of epithelial tube formation	'4/689	19/20565	0.00323978	0.0360305	0.0288358	4	Sfrp1/Wnt5a/Ptk7/Six4
MG specific, Age reduced	GO:0032409	regulation of transporter activity	'17/689	241/20565	0.00324998	0.0360468	0.0288488	17	Fxyd1/Fhl1/Prnp/Stk39/Ppargc1a/Cacna2d1/Atp1a2/Tcaf1/Atp1b1/Cacng7/Ins2/Dlg4/Bmp4/Snca/Tcaf2/Arc/Fxyd7
MG specific, Age reduced	GO:0003015	heart process	'15/689	201/20565	0.00327055	0.036081	0.0288762	15	Cxadr/Ace2/Fxyd1/Dsg2/Cacna2d1/Atp1a2/Adora1/Dsp/Atp1b1/Pde5a/Kcnh2/Ace/Pkp2/Jup/Hey2
MG specific, Age reduced	GO:0070374	positive regulation of ERK1 and ERK2 cascade	'15/689	201/20565	0.00327055	0.036081	0.0288762	15	Acta2/Chil1/Htr2c/Pdgfd/C1qtnf3/Nox4/Mt3/Cx3cl1/Ccl20/Cavin3/Fgfr2/Pdgfc/Bmp4/St5/Fgf2
MG specific, Age reduced	GO:1900076	regulation of cellular response to insulin stimulus	'8/689	74/20565	0.00327931	0.0360811	0.0288763	8	Igf2/Kank1/Baiap2l1/Grb14/Irs1/Sesn3/Ins2/Ptprf
MG specific, Age reduced	GO:0048662	negative regulation of smooth muscle cell proliferation	'6/689	44/20565	0.00330246	0.0362393	0.0290029	6	Npr3/Ace2/Tgfb3/Ppargc1a/Ndrg2/Cnn1
MG specific, Age reduced	GO:0055001	muscle cell development	'14/689	182/20565	0.00336412	0.0366537	0.0293345	14	Smo/Cxadr/Wisp1/Ankrd23/Myh10/Sorbs2/Six4/Obsl1/Lmod1/Bmp4/Fhl2/Mybph/Hey2/Flnc
MG specific, Age reduced	GO:0055067	monovalent inorganic cation homeostasis	'12/689	144/20565	0.00336688	0.0366537	0.0293345	12	Car12/Slc4a4/Car2/Slc4a10/Atp1a2/Adora1/Slc4a5/Atp1b1/Car14/Kcnh2/Ace/Clcn3
MG specific, Age reduced	GO:0060402	calcium ion transport into cytosol	'12/689	144/20565	0.00336688	0.0366537	0.0293345	12	Htr2c/Prnp/Cacna2d1/Itpr1/Akap5/Bdkrb1/Ccr5/Bmp4/Snca/Trpc1/Cemip/Fgf2
MG specific, Age reduced	GO:0060977	coronary vasculature morphogenesis	'5/689	31/20565	0.0034306	0.0371513	0.0297328	5	Lrp2/Fgfr2/Ace/Hey2/Fgf2
MG specific, Age reduced	GO:0070286	axonemal dynein complex assembly	'5/689	31/20565	0.0034306	0.0371513	0.0297328	5	Drc1/Ccdc39/Dnal1/Ccdc114/Dnaic1
MG specific, Age reduced	GO:0046068	cGMP metabolic process	'7/689	59/20565	0.00345703	0.0372849	0.0298397	7	Htr2c/Adcy5/Pde9a/Nppc/Wnt5a/Pde5a/Lhb
MG specific, Age reduced	GO:0034762	regulation of transmembrane transport	'26/689	436/20565	0.00346902	0.0372849	0.0298397	26	Clic6/Fxyd1/Fhl1/Prnp/Stk39/Ppargc1a/Kcnj13/Cacna2d1/Azin2/Car2/Atp1a2/Tcaf1/Atp1b1/Cacng7/Ins2/Bdkrb1/Kcnh2/Acsl6/Dlg4/Bmp4/Snca/Trpc1/Tcaf2/Arc/Cemip/Fxyd7
MG specific, Age reduced	GO:0042063	gliogenesis	'19/689	284/20565	0.00347004	0.0372849	0.0298397	19	Smo/Enpp2/Matn2/Mxra8/Clu/Ndn/Lrp2/Efemp1/Mt3/Otx2/Lamb1/Cdh2/Ntrk2/Pard3/Hdac11/Bmp4/Lrp8/Tenm4/Fgf2
MG specific, Age reduced	GO:0015711	organic anion transport	'23/689	370/20565	0.00350334	0.0375449	0.0300478	23	Slc16a9/Slc6a14/Folr1/Bdnf/Slco1c1/Htr2c/Ace2/Atp9a/Lrp2/Abat/Slc4a4/Stk39/Ntrk2/Slc6a17/Slc6a20a/Adora1/Slc16a4/Acsl6/Ace/Tmem27/Slco1a5/Mfsd2a/Snca
MG specific, Age reduced	GO:0009952	anterior/posterior pattern specification	'16/689	223/20565	0.00358532	0.0383239	0.0306712	16	Bmpr1a/Smo/Sfrp1/Emx2/Otx2/Cdon/Wnt2b/Wnt5a/Msx1/Crb2/Gdf11/Cobl/Bmp4/Msx2/Arc/Hey2
MG specific, Age reduced	GO:0051955	regulation of amino acid transport	'6/689	45/20565	0.00370465	0.0394971	0.0316102	6	Htr2c/Abat/Stk39/Adora1/Tmem27/Snca
MG specific, Age reduced	GO:0010838	positive regulation of keratinocyte proliferation	'3/689	10/20565	0.00376688	0.0397498	0.0318124	3	Cdh3/Has2/Stxbp4
MG specific, Age reduced	GO:0060513	prostatic bud formation	'3/689	10/20565	0.00376688	0.0397498	0.0318124	3	Sulf1/Wnt5a/Bmp4
MG specific, Age reduced	GO:1901678	iron coordination entity transport	'3/689	10/20565	0.00376688	0.0397498	0.0318124	3	Lrp2/Slc22a17/Lcn2
MG specific, Age reduced	GO:2000392	regulation of lamellipodium morphogenesis	'3/689	10/20565	0.00376688	0.0397498	0.0318124	3	Enpp2/Kank1/Pdpn
MG specific, Age reduced	GO:0003229	ventricular cardiac muscle tissue development	'7/689	60/20565	0.00380298	0.0400283	0.0320353	7	Bmpr1a/Lrp2/Dsg2/Fgfr2/Dsp/Pkp2/Hey2
MG specific, Age reduced	GO:0030177	positive regulation of Wnt signaling pathway	'10/689	110/20565	0.00386742	0.0402589	0.0322199	10	Sulf1/Sfrp1/Kank1/Lmx1a/Wnt2b/Wnt5a/Fgfr2/Lgr4/Dixdc1/Fgf2
MG specific, Age reduced	GO:0045844	positive regulation of striated muscle tissue development	'8/689	76/20565	0.003871	0.0402589	0.0322199	8	Bmpr1a/Ncam1/Wisp1/Cdon/Fgfr2/Bmp4/Hey2/Fgf2
MG specific, Age reduced	GO:0048636	positive regulation of muscle organ development	'8/689	76/20565	0.003871	0.0402589	0.0322199	8	Bmpr1a/Ncam1/Wisp1/Cdon/Fgfr2/Bmp4/Hey2/Fgf2
MG specific, Age reduced	GO:0048489	synaptic vesicle transport	'11/689	128/20565	0.00387368	0.0402589	0.0322199	11	Syt12/Snap91/Sytl3/Mylk2/Fgfr2/Pfn2/Syt17/Unc13b/Snca/Syt9/Prepl
MG specific, Age reduced	GO:0097480	establishment of synaptic vesicle localization	'11/689	128/20565	0.00387368	0.0402589	0.0322199	11	Syt12/Snap91/Sytl3/Mylk2/Fgfr2/Pfn2/Syt17/Unc13b/Snca/Syt9/Prepl
MG specific, Age reduced	GO:0042573	retinoic acid metabolic process	'4/689	20/20565	0.00394365	0.0403451	0.0322889	4	Rdh10/Rbp1/Aldh1a3/Crabp2
MG specific, Age reduced	GO:0060080	inhibitory postsynaptic potential	'4/689	20/20565	0.00394365	0.0403451	0.0322889	4	Bdnf/Abat/Cx3cl1/Unc13b
MG specific, Age reduced	GO:0061339	establishment or maintenance of monopolar cell polarity	'4/689	20/20565	0.00394365	0.0403451	0.0322889	4	Foxj1/Wnt5a/Ptk7/Crb3
MG specific, Age reduced	GO:0043536	positive regulation of blood vessel endothelial cell migration	'5/689	32/20565	0.00395562	0.0403451	0.0322889	5	Vegfc/Angpt4/Amot/Ccr5/Fgf2
MG specific, Age reduced	GO:0017015	regulation of transforming growth factor beta receptor signaling pathway	'9/689	93/20565	0.00396938	0.0403451	0.0322889	9	Folr1/Fbn1/Tgfb3/Nrep/Rasl11b/Itga3/Prdm16/Peg10/Vasn
MG specific, Age reduced	GO:0045778	positive regulation of ossification	'9/689	93/20565	0.00396938	0.0403451	0.0322889	9	Bmpr1a/Cthrc1/Ddr2/Kl/Nppc/Wnt5a/Bmp4/Msx2/Fgf2
MG specific, Age reduced	GO:0060021	palate development	'9/689	93/20565	0.00396938	0.0403451	0.0322889	9	Bmpr1a/Fras1/Prrx1/Tgfb3/Wnt5a/Msx1/Gdf11/Prdm16/Gas1
MG specific, Age reduced	GO:0060840	artery development	'9/689	93/20565	0.00396938	0.0403451	0.0322889	9	Bmpr1a/Folr1/Prrx1/Lrp2/Lox/Myh10/Adamts6/Bmp4/Hey2
MG specific, Age reduced	GO:0022612	gland morphogenesis	'12/689	147/20565	0.00397976	0.0403451	0.0322889	12	Cyp7b1/Sulf1/Sfrp1/Tnc/Slc12a2/Wnt5a/Fgfr2/Slit2/Ddr1/Pthlh/Bmp4/Msx2
MG specific, Age reduced	GO:0051017	actin filament bundle assembly	'12/689	147/20565	0.00397976	0.0403451	0.0322889	12	Ppm1e/Eln/Cald1/Nox4/Tgfb3/Baiap2l1/Id1/Myh10/Pfn2/Ezr/Pls1/Ttc8
MG specific, Age reduced	GO:0048562	embryonic organ morphogenesis	'20/689	309/20565	0.0039991	0.0404419	0.0323663	20	Smo/Folr1/Cthrc1/Prrx1/Fzd6/Tgfb3/Ccdc39/Otx2/Rdh10/Wnt5a/Ptk7/Fgfr2/Msx1/Lrig1/Crb2/Six4/Fzd3/Bmp4/Aldh1a3/Gas1
MG specific, Age reduced	GO:0002064	epithelial cell development	'16/689	226/20565	0.00408188	0.0411781	0.0329555	16	Smo/Spint2/Id1/Arhgef26/Wnt5a/Fgfr2/Slc4a5/Cldn1/Pard3/Fat1/Ezr/Bmp4/Cgn/Cldn3/Ift74/Shroom3
MG specific, Age reduced	GO:0061035	regulation of cartilage development	'7/689	61/20565	0.00417458	0.0420106	0.0336217	7	Efemp1/Wnt5a/Bmp1/Scx/Pthlh/Bmp4/Rflnb
MG specific, Age reduced	GO:1901861	regulation of muscle tissue development	'12/689	148/20565	0.00420288	0.0421924	0.0337673	12	Bmpr1a/Bdnf/Cxadr/Ncam1/Wisp1/Cdon/Ppargc1a/Fgfr2/Six4/Bmp4/Hey2/Fgf2
MG specific, Age reduced	GO:0060419	heart growth	'9/689	94/20565	0.00426267	0.0425855	0.0340818	9	Bmpr1a/Cxadr/Ncam1/Wisp1/Fgfr2/Sorbs2/Hey2/Tenm4/Fgf2
MG specific, Age reduced	GO:0061053	somite development	'9/689	94/20565	0.00426267	0.0425855	0.0340818	9	Bmpr1a/Smo/Sfrp1/Otx2/Wnt5a/Crb2/Scx/Cobl/Six4
MG specific, Age reduced	GO:0009799	specification of symmetry	'11/689	130/20565	0.00435835	0.0434361	0.0347626	11	Smo/Folr1/Drc1/Foxj1/Ccdc39/Dync2li1/Wnt5a/Dnaic1/Bmp4/Zic2/Ift74
MG specific, Age reduced	GO:0022898	regulation of transmembrane transporter activity	'16/689	228/20565	0.00444321	0.0441752	0.0353541	16	Fxyd1/Fhl1/Prnp/Stk39/Ppargc1a/Cacna2d1/Atp1a2/Tcaf1/Atp1b1/Cacng7/Ins2/Dlg4/Bmp4/Tcaf2/Arc/Fxyd7
MG specific, Age reduced	GO:0008038	neuron recognition	'5/689	33/20565	0.00453566	0.0448178	0.0358684	5	Bdnf/Ncam1/Ndn/Cntnap2/Wnt5a
MG specific, Age reduced	GO:0050435	amyloid-beta metabolic process	'5/689	33/20565	0.00453566	0.0448178	0.0358684	5	Mme/Clu/Prnp/Bace1/Ace
MG specific, Age reduced	GO:0090263	positive regulation of canonical Wnt signaling pathway	'8/689	78/20565	0.0045419	0.0448178	0.0358684	8	Sfrp1/Lmx1a/Wnt2b/Wnt5a/Fgfr2/Lgr4/Dixdc1/Fgf2
MG specific, Age reduced	GO:1903844	regulation of cellular response to transforming growth factor beta stimulus	'9/689	95/20565	0.00457261	0.0448178	0.0358684	9	Folr1/Fbn1/Tgfb3/Nrep/Rasl11b/Itga3/Prdm16/Peg10/Vasn
MG specific, Age reduced	GO:0001658	branching involved in ureteric bud morphogenesis	'7/689	62/20565	0.00457302	0.0448178	0.0358684	7	Smo/Wnt2b/Maged1/Lgr4/Six4/Bmp4/Fgf2
MG specific, Age reduced	GO:0055021	regulation of cardiac muscle tissue growth	'7/689	62/20565	0.00457302	0.0448178	0.0358684	7	Bmpr1a/Cxadr/Ncam1/Wisp1/Fgfr2/Hey2/Fgf2
MG specific, Age reduced	GO:0055123	digestive system development	'11/689	131/20565	0.00461812	0.0451525	0.0361363	11	Smo/Sfrp1/Igf2/Ccdc39/Wnt5a/Fgfr2/Hip1r/Lgr4/Cobl/Pdgfc/Bmp4
MG specific, Age reduced	GO:0032331	negative regulation of chondrocyte differentiation	'4/689	21/20565	0.00474412	0.0460571	0.0368602	4	Efemp1/Pthlh/Bmp4/Rflnb
MG specific, Age reduced	GO:0042053	regulation of dopamine metabolic process	'4/689	21/20565	0.00474412	0.0460571	0.0368602	4	Htr2c/Abat/Maob/Snca
MG specific, Age reduced	GO:2000678	negative regulation of transcription regulatory region DNA binding	'4/689	21/20565	0.00474412	0.0460571	0.0368602	4	Id1/Msx1/Msx2/Hey2
MG specific, Age reduced	GO:0048568	embryonic organ development	'27/689	470/20565	0.00483514	0.0468305	0.0374792	27	Bmpr1a/Smo/Spint2/Folr1/Cthrc1/Prrx1/Fzd6/Igf2/Tgfb3/Ccdc39/Otx2/Rdh10/Wnt5a/Ptk7/Fgfr2/Msx1/Lrig1/Llgl2/Crb2/Cobl/Six4/Fzd3/Bmp4/Plcd3/Aldh1a3/Gas1/Hey2
MG specific, Age reduced	GO:0003151	outflow tract morphogenesis	'8/689	79/20565	0.00490913	0.0473549	0.0378989	8	Bmpr1a/Folr1/Lrp2/Wnt5a/Fgfr2/Bmp4/Msx2/Hey2
MG specific, Age reduced	GO:0043406	positive regulation of MAP kinase activity	'15/689	210/20565	0.00491224	0.0473549	0.0378989	15	Pdgfd/Nox4/Tgfb3/Ajuba/Maged1/Tpd52l1/Wnt5a/Plce1/Adora1/Ins2/Pde5a/Pdgfc/Bmp4/Fgf2/5730559C18Rik
MG specific, Age reduced	GO:0021766	hippocampus development	'7/689	63/20565	0.00499947	0.047803	0.0382575	7	Smo/Emx2/Lmx1a/Tmem108/Mfsd2a/Lrp8/Bbs1
MG specific, Age reduced	GO:0002138	retinoic acid biosynthetic process	'3/689	11/20565	0.00505141	0.047803	0.0382575	3	Rdh10/Rbp1/Aldh1a3
MG specific, Age reduced	GO:0016102	diterpenoid biosynthetic process	'3/689	11/20565	0.00505141	0.047803	0.0382575	3	Rdh10/Rbp1/Aldh1a3
MG specific, Age reduced	GO:0042048	olfactory behavior	'3/689	11/20565	0.00505141	0.047803	0.0382575	3	Lmx1a/Gjb4/Bbs1
MG specific, Age reduced	GO:0055015	ventricular cardiac muscle cell development	'3/689	11/20565	0.00505141	0.047803	0.0382575	3	Myh10/Fhl2/Hey2
MG specific, Age reduced	GO:0060281	regulation of oocyte development	'3/689	11/20565	0.00505141	0.047803	0.0382575	3	Grb14/Nppc/Pde5a
MG specific, Age reduced	GO:0060346	bone trabecula formation	'3/689	11/20565	0.00505141	0.047803	0.0382575	3	Sfrp1/Thbs3/Msx2
MG specific, Age reduced	GO:1905879	regulation of oogenesis	'3/689	11/20565	0.00505141	0.047803	0.0382575	3	Grb14/Nppc/Pde5a
MG specific, Age reduced	GO:0072330	monocarboxylic acid biosynthetic process	'13/689	171/20565	0.00510359	0.0481863	0.0385643	13	Cyp7b1/Elovl7/Fads2/Elovl6/Fads3/Abat/Scd2/Rdh10/Ptgds/Rbp1/Elovl4/Mgll/Aldh1a3
MG specific, Age reduced	GO:0046189	phenol-containing compound biosynthetic process	'6/689	48/20565	0.00512967	0.0483219	0.0386728	6	Kl/Cdh3/Moxd1/Wnt5a/Snca/Trpc1
MG specific, Age reduced	GO:0033238	regulation of cellular amine metabolic process	'5/689	34/20565	0.00517371	0.0486258	0.038916	5	Htr2c/Abat/Maob/Ins2/Snca
MG specific, Age reduced	GO:0006612	protein targeting to membrane	'8/689	80/20565	0.00529866	0.049687	0.0397653	8	Folr1/Prnp/Dusp18/Adora1/Tcaf1/Pard3/Tcaf2/Cemip
